1 **Single cell preparations of *Mycobacterium tuberculosis* damage the mycobacterial envelope and**  
2 **disrupt macrophage interactions**

3

4 Ekansh Mittal<sup>a,b,1</sup>, Andrew T. Roth<sup>c,1</sup>, Anushree Seth<sup>d</sup>, Srikanth Singamaneni<sup>d,e</sup>, Wandy Beatty<sup>b</sup>, Jennifer  
5 A. Philips<sup>a,b,2</sup>

6

7 <sup>a</sup>Division of Infectious Diseases, Department of Medicine, Washington University School of Medicine, St. Louis,  
8 MO, 63130, USA.

9 <sup>b</sup>Department of Molecular Microbiology, Washington University School of Medicine, St. Louis, MO, 63130, USA.

10 <sup>c</sup>Division of Pulmonary and Critical Care Medicine, Department of Medicine, Washington University School of  
11 Medicine, St. Louis, MO, 63130, USA.

12 <sup>d</sup>Department of Mechanical Engineering and Materials Science, Institute of Materials Science and  
13 Engineering, Washington University in St. Louis, St. Louis, MO, 63130, USA.

<sup>e</sup>Siteman Cancer Center, Washington University in St. Louis, St. Louis, MO, 63110, USA.

<sup>1</sup>Equal contribution.

<sup>2</sup>To whom correspondence can be addressed.

14

15 **Keywords:** *M. tuberculosis*, host-pathogen interactions, phthiocerol dimycocerosate, macrophage

16

17

18

19

20

21

22 **Abstract**

23 For decades, investigators have studied the interaction of *Mycobacterium tuberculosis* (Mtb) with  
24 macrophages, which serve as a major cellular niche for the bacilli. Because Mtb are prone to  
25 aggregation, investigators rely on varied methods to disaggregate the bacteria for these studies. Here,  
26 we examined the impact of routinely used preparation methods on bacterial cell envelope integrity,  
27 macrophage inflammatory responses, intracellular Mtb survival, and virulence in mice. We found that  
28 both gentle sonication and filtering damaged the mycobacterial cell envelope and markedly impacted  
29 the outcome of macrophage infections. Unexpectedly, sonicated bacilli were hyperinflammatory,  
30 eliciting dramatically higher expression of TLR2-dependent genes and elevated secretion of IL-1 $\beta$  and  
31 TNF- $\alpha$ . Despite evoking enhanced inflammatory responses, sonicated bacilli replicated normally in  
32 macrophages. In contrast, Mtb that had been passed through a filter induced little inflammatory  
33 response, and they were highly attenuated in macrophages. Previous work suggests that the  
34 mycobacterial cell envelope lipid, phthiocerol dimycocerosate (PDIM), dampens macrophage  
35 inflammatory responses to Mtb. However, we found that the impact of PDIM depended on the method  
36 used to prepare Mtb. In conclusion, widely used methodologies to disaggregate Mtb may introduce  
37 experimental artifacts in Mtb-host interaction studies, including alteration of host inflammatory signaling,  
38 intracellular bacterial survival, and interpretation of bacterial mutants.

39

## 40 **Introduction**

41 A fundamental feature of the pathogenesis of *Mycobacterium tuberculosis* (Mtb), the etiologic agent of  
42 tuberculosis (TB), is its ability to survive and grow in host macrophages. For more than five decades,  
43 many laboratories have investigated how Mtb interacts with and modulates the function of  
44 macrophages. Mtb is characterized by a “waxy” coat, which confers its distinctive acid-fast staining  
45 properties. The complex cell envelope is important for pathogenesis and also allows Mtb to withstand  
46 adverse conditions (Dulberger et al., 2020). The mycobacterial envelope consists of a plasma  
47 membrane, peptidoglycan-arabinogalactan layer, outer membrane, and capsular layer (Dulberger et  
48 al., 2020). The outermost layers of the envelope are crucial in host-pathogen interactions given that  
49 they are directly able to interact with host cells. The capsule is composed primarily of a loose matrix of  
50 neutral polysaccharides (Kalscheuer et al., 2019), while the outer membrane is composed of long-chain  
51 mycolic fatty acids that are free, attached to trehalose, or covalently attached to the underlying  
52 arabinogalactan-peptidoglycan layer. The outer membrane also contains a complex array of unique  
53 lipids, such as phthiocerol dimycocerosate (PDIM), phenolic glycolipids, and sulfolipids. Many of these  
54 lipids are bioactive; they can intercalate into host membranes, alter inflammatory signaling, disrupt  
55 phagosome maturation, and promote mycobacterial virulence (Cambier et al., 2020; Lerner et al., 2018;  
56 Quigley et al., 2017). Some outer membrane lipids, such as PDIM, phenolic glycolipids, and  
57 sulfoglycolipids, are thought to act as antagonists of pathogen recognition receptors (PRRs) or to shield  
58 underlying pathogen associated molecular patterns (PAMPs) to prevent them from activating PRRs  
59 (Blanc et al., 2017; Cambier et al., 2014; Reed et al., 2004). Thus, the integrity of the envelope is crucial  
60 for host interactions and bacterial virulence.

61

62 Given the importance of Mtb-macrophage interactions, a mainstay of the experimental approach of  
63 many laboratories is the use of *in vitro* cultured Mtb to infect myeloid cells. However, the tendency of  
64 Mtb to form bacterial clumps has long presented an obstacle to these experiments, which depend on  
65 using precise and reproducible amounts of bacteria (Wells, 1946). For this reason, low concentrations  
66 of detergents are commonly added to culture media, but this does not fully resolve the problem.

67 Therefore, additional measures are routinely taken to generate single cell suspensions, including  
68 sonicating, syringing, centrifuging, filtering, vortexing with glass beads, or some combination of these  
69 procedures. The use of these techniques varies widely across different laboratories, the methodology  
70 used is not always reported, and there has been little consideration as to how these techniques impact  
71 experimental outcomes.

72

73 We are interested in how mycobacterial protein and lipid effectors modulate macrophage responses.  
74 Sometimes our results differed from published data, leading us to question whether the method of  
75 preparing the bacilli explained the differences. However, there was minimal literature into how  
76 dispersing mycobacterial clumps impacts the envelope and host-pathogen interactions. Previous  
77 studies demonstrated that use of detergent and agitation can release capsular constituents (Lemassu  
78 et al., 1996; Sani et al., 2010). In addition, it was reported that Mtb that had been sonicated for 90  
79 seconds were better able to bind to macrophages, and the bacterial envelope appeared uneven and  
80 bulging on transmission electron microscopy (Stokes et al., 2004). Another study showed that passing  
81 bacterial cultures through 5 $\mu$ m pore filters improved reproducibility of high-throughput antibacterial drug  
82 screening compared to vortexing, but the impact on host-pathogen interactions was not assessed  
83 (Cheng et al., 2014). Given the lack of published studies addressing our concern, we compared three  
84 routinely used methods of preparing single cell suspensions of Mtb: low-speed spin, gentle sonication  
85 followed by low-speed spin, or filtration through a 5 $\mu$ m filter. We found that the method of bacterial  
86 preparation had a marked impact on intracellular bacterial viability, the global transcriptional pattern of  
87 infected cells, macrophage secretion of key innate immune mediators, and the ultrastructure of the  
88 bacterial cell envelope. Finally, when comparing an Mtb mutant that lacks PDIM to WT bacilli, we found  
89 that the method of preparation had a substantial impact on the inflammatory response to the mutant  
90 bacilli.



91

## 92 **Results**

### 93 **Macrophage transcriptional responses to Mtb depend on the method of bacterial preparation**

94 To investigate whether the method of dispersing bacterial cultures impacts host responses, we  
95 examined gene expression profiles of bone marrow-derived macrophages (BMDMs) that were  
96 uninfected or infected with WT Mtb (H37Rv strain) that had been prepared either by passing through a  
97 5 $\mu$ m filter (5 $\mu$ mF) or by brief sonication (so). The sonicated samples underwent three 10-second cycles  
98 in a water bath sonicator as described in **Methods**, followed by a low-speed spin (sp) and are  
99 designated so/sp. Bacilli prepared by the two methods were added to BMDMs at a multiplicity of  
100 infection (MOI) of 5, washed to remove extracellular bacteria after 4 h, and processed for RNA-seq 72  
101 hours post-infection (hpi). We found that 536 genes were differentially expressed between uninfected  
102 cells and both of the infected samples (adjusted P value  $\leq 0.01$ ; fold change  $\geq |2|$ ). Surprisingly, however,  
103 there were even more genes that were differentially expressed uniquely in macrophages infected by  
104 only one of the two bacterial preparations. 902 differentially expressed genes (DEGs) were unique when  
105 we compared uninfected with so/sp-infected macrophages, while 122 genes were uniquely differentially  
106 expressed in response to 5 $\mu$ mF bacteria (**Fig. 1A; Supplementary Figure 1A; Supplementary Table**  
107 **1**). When we compared the DEGs in BMDM infected with so/sp-Mtb to those infected with the 5 $\mu$ mF-  
108 preparations, there were 732 DEGs (**Fig. 1A-B**). These included important host defense molecules,  
109 including *Il6*, *Nos2*, and *Il1b*, which were markedly higher in so/sp-infected BMDMs compared to 5 $\mu$ mF-  
110 infected BMDMs (**Fig. 1B**).

111

112 In order to further analyze the transcriptional differences, we used Gene Set Enrichment Analysis  
113 (GSEA) to query our expression data against hallmark gene sets from the Molecular Signatures  
114 Database (Liberzon et al., 2015). We found that 10 hallmark gene sets were significantly enriched in  
115 so/sp preparations relative to 5 $\mu$ mF-infected BMDMs (P  $\leq 0.01$ ; FDR  $\leq 0.01$ ) (**Fig. 1C-D, Supplemental**  
116 **Fig. 1B**). The sonicated bacilli elicited a significant enrichment of gene sets that included TNFA

117 signaling via NF $\kappa$ B, inflammatory response, MTORC1 signaling, glycolysis, xenobiotic metabolism, and  
118 IL6 JAK STAT3 signaling (**Fig. 1C, Supplemental Fig. 1B**). In contrast, 1 hallmark gene set was  
119 significantly enriched in 5 $\mu$ mF- relative to so/sp-infected BMDMs (E2F targets) (**Supplemental Fig.**  
120 **1C**). Visualization of transcriptional data from the hallmark gene set “inflammatory response” showed a  
121 distinct gene expression pattern in response to so/sp versus 5 $\mu$ mF bacteria (**Fig. 1D**). Overall, the  
122 macrophages infected with the so/sp bacilli displayed a more robust pro-inflammatory phenotype,  
123 whereas the 5 $\mu$ mF-infected macrophages were enriched in pro-replication pathways. In addition to the  
124 72 hpi timepoint used for RNA-seq, we found that infection with so/sp Mtb elicited significantly higher  
125 levels of expression of *Il1b*, *Nos2*, *Il6* and *Tnf* at 6 and 24 hpi by qPCR compared with 5 $\mu$ mF  
126 preparations, with the greatest difference seen early in infection (**Fig. 1E-F**). Strikingly, while the so/sp  
127 bacilli markedly upregulated inflammatory gene expression, there was minimal difference between  
128 5 $\mu$ mF-infected and uninfected macrophage 6 hpi and 24 hpi. In these experiments, we used 5 $\mu$ m filters  
129 with hydrophilic polyethersulfone (PES) membranes, which are composed of aryl-SO<sub>2</sub>-aryl subunits.  
130 We considered the possibility that the chemical backbone and hydrophilic nature of the filter might be  
131 altering Mtb, but we had similar findings when we used hydrophobic polytetrafluoroethylene (PTFE)  
132 filters (**Supplemental Fig. 2A**). In conclusion, the transcriptional response of BMDMs to Mtb infection  
133 was markedly different depending on the method of bacterial preparation.

134

### 135 **Sonication increases the inflammatory impact of Mtb**

136 Given the dramatic difference between so/sp and 5 $\mu$ mF bacilli, it was important to assess which one  
137 more accurately reflects unperturbed Mtb. However, if we were to use Mtb directly from a liquid culture,  
138 it would not be possible to establish that we are using similar numbers of bacilli compared to the other  
139 preparations given the propensity to clump. Therefore, we used a low-speed spin preparation. This was  
140 the same procedure applied to the so/sp sample, but the sonication step was omitted. Specifically, liquid  
141 cultures were centrifuged at 206 x g for 10 minutes, after which the supernatant was removed and  
142 centrifuged at 132 x g for 8 minutes, and the final supernatant was used to infect BMDMs. We found

143 that macrophages infected with the spin (sp) sample had an intermediate phenotype between so/sp  
144 and 5 $\mu$ mF samples (**Fig. 2A**), eliciting significantly less *Il1b*, *Il6*, *Nos2*, and *Tnf* expression than the  
145 so/sp samples. A variety of Mtb PAMPs have been shown to activate TLR2 (Hinman et al., 2021). In  
146 order to establish whether the so/sp samples were activating TLR2-dependent pathways, we infected  
147 BMDMs from *Tlr2*<sup>-/-</sup> mice. We found that expression of *Il1b*, *Il6*, *Nos2*, and *Tnf* were significantly reduced  
148 in TLR2 KO BMDMs in response to so/sp Mtb relative to WT BMDMs (**Fig. 2B**). This was also true for  
149 the induction observed in response to spin preparations.

150

151 We wondered if the 5 $\mu$ mF bacilli contained a factor that inhibited macrophage gene expression or if  
152 they were just less proinflammatory. To address this, we mixed so/sp and 5 $\mu$ mF bacilli together in equal  
153 proportions and assayed gene expression by qPCR. We found that the mixed samples were still  
154 inflammatory, arguing against a potent inhibitory factor coming from the filtered preparation  
155 (**Supplemental Fig. 2B**). In addition, if we prepared bacteria by first sonicating and then using a 5 $\mu$ mF  
156 (so/5 $\mu$ mF), the expression changes resembled so/sp infection, with marked upregulation of *Il1b*, *Il6*,  
157 *Nos2*, and *Tnf* (**Fig. 2A**). We considered the possibility that the different inflammatory responses might  
158 be a result of different degrees of aggregation of the bacilli in each preparation. To visualize the bacteria,  
159 we infected BMDMs with GFP-expressing Mtb prepared by the various methods and examined them  
160 by fluorescence microscopy. We found that the bacilli from the 5 $\mu$ mF preparation were uniformly  
161 composed of single cells, while small clumps were routinely seen in both the so/sp and sp samples  
162 (**Fig. 2C**). Thus, one possibility was that clumps are more inflammatory, but when the sonicated sample  
163 was filtered (so/5 $\mu$ mF), there were no clumps, and the bacilli still induced high levels of *Il1b*, *Il6*, *Nos2*,  
164 and *Tnf* (**Fig. 2A-C**). To investigate whether the response to sonicated bacteria was due to soluble  
165 factors released from the bacilli, we passed the so/sp sample through a 0.2  $\mu$ m filter to remove bacteria.  
166 We treated macrophages with equal volumes of the sterile filtrate or the unfiltered so/sp sample, and  
167 analyzed subsequent gene expression. In support of extra-bacterial components contributing to the  
168 inflammatory gene expression, the expression of *Il1b*, *Nos2*, *Il6*, and *Tnf* were all significantly increased

169 in response to the sterile filtrate prepared from the so/sp bacteria compared to uninfected BMDMs (**Fig.**  
170 **2D**). In contrast, there was no difference in expression of these genes in the sterile filtrate of 5 $\mu$ mF  
171 bacteria relative to uninfected BMDMs (**Fig. 2D**). To conclude, compared to bacteria prepared by a low-  
172 speed spin or 5 $\mu$ mF, bacilli that were sonicated induced substantially higher TLR2-dependent  
173 transcriptional responses in macrophages, independent of their aggregation status and due in part to  
174 soluble mediators.

175

176 To determine whether the changes in gene expression resulted in altered cytokine secretion, we used  
177 the FluoroDOT assay to evaluate secretion of TNF- $\alpha$ . This approach uses plasmon-enhanced  
178 fluorescent nanoparticles called plasmonic fluors to visualize protein secretion by microscopy  
179 (**Supplemental Fig. 3**). This allowed us to examine secretion of TNF- $\alpha$  at an early time point after  
180 infection and with single cell resolution (Liang et al., 2021). Similar to the transcriptional data, the  
181 sonicated preparations elicited the most TNF- $\alpha$  secretion followed by the sp and 5 $\mu$ mF preparations  
182 (**Fig. 3A-B**). We confirmed these findings by measuring TNF- $\alpha$  by enzyme linked immunosorbent assay  
183 (ELISA; **Fig. 3C**). We also evaluated IL-1 $\beta$  secretion using ELISA and found that the so/sp preparation  
184 elicited increased secretion of IL-1 $\beta$  (**Fig. 3C**). Interestingly, we found that when infected by the  
185 sonicated samples, most of the macrophages, both infected as well as uninfected bystanders in the  
186 same well, secreted TNF- $\alpha$ . In contrast, infection with the sp or 5 $\mu$ mF Mtb resulted in only infected cells  
187 secreting TNF- $\alpha$  (**Fig. 3A-B**). In addition, so/sp samples that had been sterilized by passage through a  
188 0.2  $\mu$ m filter elicited significantly more TNF- $\alpha$  secretion than sterilized 5 $\mu$ mF samples (**Fig.3D-E**). This  
189 is consistent with the observation that extra-bacterial components in the sonicated preparation  
190 contribute to inflammatory gene expression.

191

### 192 **Filtered Mtb are markedly attenuated in BMDMs but not in AMs or mice**

193 Given that the different preparations generated pronounced differences in macrophage gene  
194 expression and cytokine secretion, we hypothesized that they would also exhibit differences in

195 intracellular viability. We infected BMDMs with Mtb prepared by the different methods, and the  
196 intracellular bacilli were enumerated at 4 hpi and 5 days post-infection (dpi). Mtb that were prepared by  
197 so/sp or sp were able to grow in macrophages, a defining feature of Mtb pathogenesis (**Fig. 4A**). In  
198 contrast, the filtered bacteria (so/5 $\mu$ mF and 5 $\mu$ mF) failed to grow. While the transcriptional profile in  
199 response to so/5 $\mu$ mF bacteria resembled so/sp bacteria, their growth was equally attenuated as the  
200 5 $\mu$ mF bacteria, suggesting that filtering was destructive to the bacteria. Increasing the MOI of the filtered  
201 bacteria to 20 or 40 did not overcome the intracellular growth defect. We verified that the filtered Mtb  
202 were still viable, as they grew indistinguishably from other preparations when they were inoculated in  
203 liquid culture (**Supplemental Fig. 2C**). In addition, filtered bacteria were able to grow in alveolar  
204 macrophages, which are more permissive to Mtb growth than BMDMs (**Fig. 4B**). Thus, filtered Mtb  
205 appeared to have lost the ability to counter the antimicrobial properties of BMDMs.

206

207 To assess whether different bacterial preparation alter outcomes *in vivo*, we infected C57BL/6 mice with  
208 different bacterial preparations of Mtb using the low-dose aerosol model of infection. We found that we  
209 had to use twice as many 5 $\mu$ mF bacilli in the nebulizer to achieve the same number of bacteria in the  
210 lung on the day after infection. We did not find any significant difference in whole-lung CFU from lung 7  
211 or 14 days dpi or from spleens at 14 dpi (**Fig. 4C-D**). Further, the whole-lung expression of IL-1 $\beta$ , IL-6,  
212 and TNF- $\alpha$  were the same irrespective of bacterial preparation method (**Fig. 4E-F**). In conclusion,  
213 although the aerosol inoculum had to be adjusted to achieve the same starting dose of the 5 $\mu$ mF  
214 bacteria, we observed no differences in growth of Mtb in the lungs or spleen during the first two weeks  
215 of infection and no differences in expression of pro-inflammatory cytokines based upon preparation  
216 method.

217

## 218 **Sonication and filtering affect the bacterial cell wall**

219 To determine if there were structural differences between the sonicated, spun, and filtered Mtb, we used  
220 transition electron microscopy (TEM). We first generated ultrathin cross-sections of bacteria to visualize

221 the ultrastructure of the cell envelope (**Fig. 5A-C**). In bacteria prepared with low-speed spin, we could  
222 distinguish the structural layers of the cell envelope that have been previously described: the innermost  
223 phospholipid bilayer, followed by electron-dense peptidoglycan and arabinogalactan layers, a  
224 translucent mycobacterial outer membrane, and an outermost carbohydrate-rich capsular layer (**Fig.**  
225 **5B**). In bacteria prepared with sonication, all of these distinct layers were apparent (**Fig. 5A**). In the  
226 5 $\mu$ mF-prepared bacteria, the phospholipid bilayer was seen, surrounded by an electron dense layer,  
227 but there appeared to be loss of the capsular layer and potentially the mycomembrane as well (**Fig.**  
228 **5C**). While TEM of ultrathin cross-sections provided excellent resolution of the cell wall, it was also  
229 subject to artifact introduced by drying and fracturing of the bacteria required in this technique. This  
230 made it difficult to know how representative the well-preserved bacilli were in terms of the total  
231 population. Therefore, we also visualized bacilli by adsorption to a copper grid followed by 1% uranyl  
232 acetate staining, a simple technique which minimized artifact (**Fig. 5D-F**). Uranyl acetate is a common  
233 negative stain used for TEM that can bind to capsular polysaccharides (Stukalov et al., 2008), and it  
234 created an electron dense halo around the bacteria. The prominent electron dense halo was seen on  
235 the majority of so/sp and low-speed spin bacteria (**Fig. 5D-E**), but absent from most bacteria prepared  
236 with the 5 $\mu$ mF (**Fig. 5F**). This suggests a different chemical composition of the outermost layer of the  
237 filtered bacteria and was consistent with the differences noted in the TEM. In addition, the samples from  
238 5 $\mu$ mF-treated bacteria had substantial extracellular debris, which may be damaged fragments from the  
239 outer layers of the envelope. Finally, more dead bacteria were noted in the 5 $\mu$ mF sample as evidenced  
240 by penetration of the dark staining uranyl acetate into the cells. Using this technique, we also observed  
241 that the so/sp bacteria, but not sp or 5 $\mu$ mF bacteria, had prominent round protuberances that were  
242 approximately 0.2 to 1  $\mu$ m in diameter present on the outer surface of the bacteria or, less frequently,  
243 in the culture filtrate. To conclude, both sonicated and filtered preparations had EM evidence of distinct  
244 types of damage to the envelope that were not apparent in the samples which had been prepared by  
245 centrifugation.

246

247 **The interpretation of the role of PDIM in inflammatory responses depends upon preparation**  
248 **method**

249 PDIM is a multifunctional virulence lipid that is present in the envelope of members of the Mtb complex  
250 as well as closely related *Mycobacterium marinum*. Along with the ESX-1 type VII secretion system,  
251 PDIM facilitates phagosomal escape of Mtb, a crucial event that allows the bacteria to gain access to  
252 the cytosol, subvert cell death pathways, and promote extracellular spread (Augenstreich et al., 2017;  
253 Barczak et al., 2017; Cox et al., 1999; Lerner et al., 2018; Osman et al., 2020; Quigley et al., 2017). In  
254 addition, PDIM contributes to the low permeability of the mycobacterial envelope, alters the host's initial  
255 innate immune response, and may physically shield mycobacterial PAMPs or interfere with their  
256 activation of PRRs (Astarie-Dequeker et al., 2009; Camacho et al., 2001; Cambier et al., 2014; Murry  
257 et al., 2009; Rousseau et al., 2004; Siméone et al., 2007). To determine whether PDIM dampens  
258 inflammatory signaling, we used a strain with a deletion in *ppsD*, which results in the absence of  
259 PDIM (Barczak et al., 2017). When we examined macrophage gene expression after infection with  
260  $\Delta ppsD$  by qPCR, we found that expression of *Ii1b*, *Ii6*, *Nos2*, and *Tnf* was significantly increased  
261 compared to infection with WT Mtb, consistent with the idea that PDIM reduces inflammatory signaling  
262 (**Fig. 6A**). However, this was only in the sonicated sample; there was no difference between  $\Delta ppsD$  and  
263 WT Mtb if they were prepared by sp or 5 $\mu$ mF. We had similar findings when we used the FluoroDOT  
264 assay to examine TNF- $\alpha$  secretion (**Fig. 6B**). The  $\Delta ppsD$  mutant elicited more TNF- $\alpha$  secretion than  
265 WT Mtb, but only if the sample was sonicated. Interestingly, when we examined the  $\Delta ppsD$  mutant by  
266 EM, we found that the  $\Delta ppsD$  mutant lacked the dark halo that was seen in so/sp and sp samples of  
267 WT Mtb; the halo was restored by complementation, suggesting that lack of PDIM altered the interaction  
268 of uranyl acetate with the mycobacterial surface (**Fig. 6D-I**). This difference, however, is unlikely to  
269 account for the hyperinflammatory signaling, as it was seen in all  $\Delta ppsD$  samples, and only the  
270 sonicated samples were hyperinflammatory. As we had seen with WT Mtb, there were round protrusions  
271 and vesicles in sonicated sample of both  $\Delta ppsD$  and the complemented strain. There was no obvious  
272 visual difference between the  $\Delta ppsD$  mutant and complemented strain to explain why the so/sp  $\Delta ppsD$



273 mutant was more hyperinflammatory than so/sp WT. To conclude, the hyperinflammatory phenotype  
274 associated with the  $\Delta ppsD$  mutant depended upon the method of bacterial preparation.

275

## 276 **Discussion**

277 For decades, investigators have studied the interaction of Mtb with macrophages. They have also  
278 employed a variety of methods to disperse the bacilli to enable subsequent analysis. We found that two  
279 commonly used single cell preparation methods significantly impact Mtb-host interactions; both gentle  
280 sonication and filtering resulted in visual evidence of cell envelope damage on electron microscopy.  
281 Unexpectedly, sonicated bacilli were hyperinflammatory, and filtered Mtb were highly attenuated in  
282 macrophages. In addition, we found that the impact of PDIM on the early macrophage transcriptional  
283 responses to Mtb depended on the method of preparation. Loss of PDIM had no impact on pro-  
284 inflammatory responses to centrifuged or filtered bacteria, but it resulted in increased pro-inflammatory  
285 gene expression if the bacteria were briefly sonicated. This suggests that the PDIM mutant is either  
286 more sensitive to the sonication-induced damage or that it is more inflammatory once that damage  
287 occurs. It is important to point out that we only examined the early TLR2-dependent response. PDIM  
288 influences a variety of processes, including later TLR2-driven responses, phagosomal escape, and  
289 intracellular survival (Augenstreich et al., 2017; Barczak et al., 2017; Cambier et al., 2020; Hinman et  
290 al., 2021; Lemer et al., 2018; Osman et al., 2020; Quigley et al., 2017). It is possible that these  
291 processes are independent of preparation methods. Nonetheless, our studies demonstrate that the  
292 preparation method needs to be considered in host-pathogen interaction studies, as it can change the  
293 interpretation of bacterial mutants and has a dramatic effect on TLR2-dependent responses and  
294 intracellular bacterial survival.

295

296 We found that Mtb growth in mice was not impacted by the preparation method. This might be explained  
297 by the observation that although filtered bacilli were highly attenuated in BMDMs, they grew normally in  
298 AMs, the first myeloid cells that Mtb encounters in the lung (Cohen et al., 2018). It is notable that the  
299 filtered bacteria, which appear stripped of the outer layers of the envelope, were able to establish



300 infection and grow in AMs, highlighting the permissiveness of the first line of defense against Mtb. AMs  
301 are poised to suppress inflammatory responses to foreign material in order to prevent lung injury, and  
302 they seem poorly equipped to control Mtb infection (Huang et al., 2018; Lavalett et al., 2017; Pisu et al.,  
303 2020; Rothchild et al., 2019). By the time the bacilli enter more restrictive macrophage populations, they  
304 may have recovered from the *in vitro* procedures and adapted to the *in vivo* environment. We did find  
305 that we had to use 2-fold more filtered bacteria in the aerosol machine to achieve the same number of  
306 Mtb in the lungs as so/sp and sp preparations. This suggests that filtered bacteria may be less able to  
307 survive aerosolization or the environment in the airways, although there are a variety of other  
308 possibilities as well.

309

310 Given the extensive use of macrophages in Mtb pathogenesis studies, there are surprisingly few studies  
311 investigating the impact of dispersal methods. A 2004 study demonstrated that prolonged sonication (5  
312 minutes) reduces Mtb viability, while bacteria that had undergone gentle sonication (30 sec x 3)  
313 exhibited enhanced binding to macrophages and altered surface charge relative to syringed bacteria  
314 (Stokes et al., 2004). In that study, the sonicated bacteria had an altered cell envelope, which appeared  
315 uneven and bulging. Even though we sonicated for a shorter time (10 sec x 3), we also saw evidence  
316 of similar cell envelop disruption by TEM. In addition, sonicated bacteria elicited orders-of-magnitude  
317 higher levels of TLR2-dependent transcriptional responses, leading to enhanced IL-1 $\beta$  and TNF-  
318  $\alpha$  secretion. This was mediated in part by material that was no longer cell associated, as even sterile-  
319 filtered samples activated macrophages. In addition, uninfected bystander cells that had been treated  
320 with so/sp preparations secreted TNF- $\alpha$  in the FluoroDOT assay. Our TEM findings suggest that  
321 sonication results in cell envelope damage and generation of small structures that resemble  
322 extracellular vesicles (EVs) that have been described in Mtb, although the vesicles that we saw are  
323 generally larger than the majority of EVs (Prados-Rosales et al., 2011). Mtb EVs are formed by an active  
324 process and contain immunomodulatory molecules including lipoarabinomannan and other TLR2  
325 agonists (Athman et al., 2015; Palacios et al., 2021; Prados-Rosales et al., 2011). Whether the

326 structures formed by sonication have similar content to EVs found in growing cultures will require further  
327 studies.

328

329 While our study was limited to three common single cell preparation methods, we expect that other  
330 techniques would also impact the mycobacterial envelope and host interactions. We queried PubMed  
331 for papers published in 2021 on Mtb and macrophages to determine what methods were commonly  
332 used (**Supplemental Fig. 4**). Of the 119 papers, only 39.5% reported how they generated single cell  
333 suspensions. Of those that did report their methodology, 42.5% used more than one method. The most  
334 commonly reported methods were syringing, followed by sonication and low-speed centrifugation. Less  
335 often, filtering, vortexing with glass beads, or allowing gravity to sediment the larger clumps were used.  
336 Dispersing clumps with glass beads would likely disrupt the envelope, as studies have used this  
337 technique to selectively remove and isolate the capsular layer to analyze its components (Lemassu &  
338 Daffe, 1994; Lemassu et al., 1996; Ortalo-Magne et al., 1995). Others have reported that syringing  
339 through a 25-gauge needle produced no apparent disruption to the envelope on TEM (Stokes et al.,  
340 2004), but these samples were not evaluated further in terms of macrophage responses. We did not  
341 evaluate syringing, because it is not an approved method in our biosafety level 3 facility due to the risk  
342 of aerosolization and needle stick injuries. The physical forces used to disrupt clumps by this method  
343 might also result in envelope alterations, and investigators should consider this in their studies. Overall,  
344 we consider centrifuged samples as the least disrupted, but even centrifugation might disrupt the  
345 capsule, as do detergents that are commonly used in liquid cultures (and were used for all of our  
346 studies). Detergents are known to cause release of capsular components into the culture filtrate  
347 (Kalscheuer et al., 2019; Sani et al., 2010), although the impact on host interactions is relatively  
348 unexplored. The impact of detergent treatment on cytokine responses and vaccine responses have  
349 been evaluated, but after detergent treatment, single cell suspensions were generated by filtering,  
350 sonicating, or syringing (Prados-Rosales et al., 2016; Sani et al., 2010), complicating the interpretation.

351

352 Even if investigators had a non-disruptive way to isolate single cells, this relatively minor population  
353 may not reflect the behavior of small or large aggregates that make up a large fraction of the bacterial  
354 population. The aggregation state of Mtb has long been reported to be important to pathogenesis. For  
355 example, the observation that Mtb forms serpentine cords *in vivo* dates back to the earliest descriptions  
356 of the bacteria. Aggregated Mtb are found at the periphery of human necrotic granulomas, in alveolar  
357 macrophages of Mtb-infected patients, and are exhaled by infected individuals (Dinkele et al., 2021;  
358 Rodel et al., 2021; Ufimtseva et al., 2018). Initially, we considered that one explanation for our findings  
359 was that there are different degrees of aggregation in the different bacterial preparations (Rodel et al.,  
360 2021). We found that so/sp and sp samples contained more clumps than 5 $\mu$ mF-prepared bacilli, but the  
361 clumps cannot account for the hyperinflammatory phenotype because when the sample was  
362 subsequently filtered (so/5uF), the aggregates were removed, but it was still hyperinflammatory. In  
363 addition, the literature describing the impact of aggregation on host interactions is difficult to interpret in  
364 light of our findings, as many of these studies used agitation with glass beads, filtration, sonication, or  
365 some combination of these procedures to generate the dispersed samples (Kolloli et al., 2021;  
366 Mahamed et al., 2017; Rodel et al., 2021). Thus, the aggregation of bacilli is likely an important virulence  
367 property of Mtb, which is overlooked in the effort to generate single cell suspensions. However, in  
368 generating single cell suspensions, investigators also introduce the potential for experimental artifact.  
369 It is possible that experimental differences in how other laboratories sonicate or filter bacteria could  
370 mitigate the effects that we found. We used log phase cultures of the H37Rv strain that had been grown  
371 with gentle agitation, a fatty acid source (oleic acid), and 0.05% Tyloxapol to infect murine  
372 macrophages, but other investigators use different strains, frozen stocks, omit oleic acid, use different  
373 detergents, or infect human macrophages, all of which could lead to differences from our findings.  
374 Based upon our findings, we encourage investigators to fully report the methods that they use to grow  
375 and process mycobacteria and consider the impact of the methodology on their findings.

376

377 While sonication is an artificial stimulus, our findings highlight the massive pro-inflammatory potential  
378 of Mtb that is kept in check by the organization and integrity of the envelop. We imagine that by altering

379 cell envelop architecture, Mtb tune their interactions to achieve the desired host response (Garcia-  
380 Vilanova et al., 2019); for example, for initial infection and persistence, it may benefit the bacilli to  
381 minimize the TLR2-driven inflammatory response to promote immune evasion, whereas in order to drive  
382 tissue pathology and transmission, the bacilli may generate a hyperinflammatory phenotype. While the  
383 Mtb cell wall is known to be dynamic (Dulberger et al., 2020), little is known about the structure and  
384 function of the cell wall during different *in vivo* contexts. To this end, a recent study evaluated the  
385 ultrastructure of the Mtb cell wall *ex vivo* from infected human sputum samples (Vijay et al., 2017). The  
386 characteristic three layers were found, and a reduction in the electron translucent layer was noted when  
387 bacilli were grown under stress conditions. Further *in vivo* studies investigating how Mtb regulates cell  
388 envelop architecture to modulate host responses and deploy virulence lipids and protein effectors are  
389 needed.

390

## 391 **Materials and Methods**

### 392 **Bacterial Strains and Growth Conditions**

393 The Mtb strains H37Rv (WT),  $\Delta ppsD$ , and  $\Delta ppsD::ppsD$  were used in this study. The  $\Delta ppsD$  and  
394  $\Delta ppsD::ppsD$  strains were from A. Barczak and previously described (Barczak et al., 2017). Bacteria  
395 were grown to mid-log phase in an incubator at 37°C with 5% CO<sub>2</sub> and gentle agitation (120 rpm).  
396 Bacteria were grown in 7H9 media supplemented with Middlebrook OADC (oleic acid, albumin,  
397 dextrose, catalase), 0.05% Tyloxapol, and 0.2% glycerol. H37Rv  $\Delta ppsD$  growth media was additionally  
398 supplemented with 50 µg/mL hygromycin, GFP-expressing bacterial strains with 25 µg/mL kanamycin,  
399 and H37Rv  $\Delta ppsD::ppsD$  with 50µg/mL hygromycin and 25µg/mL kanamycin.

400

### 401 **Generation of single cell suspensions of Mtb**

402 Following growth of Mtb to mid-log phase (OD<sub>600</sub> 0.5-0.8), bacteria were washed with phosphate-  
403 buffered saline (PBS) and resuspended in the appropriate media for the subsequent study. Single cell  
404 suspensions of Mtb were generated using one or a combination of the following methods: 1) low-speed  
405 spin (sp): bacteria were centrifuged at 206 x g for 10 min followed by 132 x g for 8 min, with the

406 supernatant collected following each spin; 2) 5 $\mu$ m filter (5 $\mu$ mF): 6-20 ml of bacterial culture were added  
407 to a 10 mL syringe and then, with gentle pressure, passed through a 5 $\mu$ m polyethersulfone (PES) filter  
408 (PALL Life Sciences; cat. 4650) except in the case were polytetrafluoroethylene (PTFE) filters (Tisch  
409 scientific; cat. SF17400) were used; 3) sonication (so): 4-10 ml bacteria in a 15 ml conical tube were  
410 placed in a water bath sonicator (Branson Ultrasonics Corporation, Digital Sonifier 450) and sonicated  
411 with three pulses lasting 10 s each, with an amplitude of 80% and 5 s rests between each pulse.  
412 Following sonication, bacteria were centrifuged with a low-speed spin (so/sp) or passed through a 5 $\mu$ m  
413 filter (so/5 $\mu$ mF), as described above. Following the preparations described above, the concentrations  
414 of bacterial suspensions with OD<sub>600</sub> between 0.04-0.12 were calculated using the formula: 1 OD<sub>600</sub> = 3  
415 x 10<sup>8</sup> bacteria per mL. For some experiments, bacterial cultures were further passed through a 0.2  $\mu$ m  
416 filter (PALL Life Sciences; cat. 4652).

417

#### 418 **Mice**

419 8 to 12 week-old C57BL/6J and *Tlr2*<sup>-/-</sup> (B6.129-Tlr2tm1Kir/J) mice were obtained from The Jackson  
420 Laboratory. Mice infected with Mtb were housed in a biosafety level 3 containment suite. All work with  
421 mice were approved by the Washington University School of Medicine Institutional Animal Care and  
422 Use Committee. Euthanasia was performed in accordance with the 2020 *AVMA Guidelines for the*  
423 *Euthanasia of Animals* prior to tissue harvest.

424

#### 425 **Bone marrow-derived macrophage isolation and infection**

426 Mouse hematopoietic stem cells were isolated as described in (Banaiee et al., 2006). Hematopoietic  
427 cells were differentiated by culturing for 7 days in Dulbecco's Modified Eagle Medium (DMEM) with 10%  
428 FBS, 2 mM L-glutamine, and 1 mM pyruvate (DMEM complete). DMEM complete media was  
429 supplemented with 20% L929 cell supernatant (as a source of macrophage colony stimulating factor  
430 (M-CSF), 100 U/mL final concentration), 10 units/ml penicillin, and 10 units/ml streptomycin. Following  
431 differentiation, BMDMs were washed with PBS, resuspended in DMEM complete with 10% L929 cell

432 supernatant, and plated for infection the following day. Single cell suspensions of Mtb in DMEM  
433 complete with 10% L929 added to macrophages at a MOI of 5, 10, 20, or 40, and plates were spun for  
434 5 minutes at 51 x g. The MOI was verified by plating the inoculum. At 4 hpi, macrophages were washed  
435 3 times with DMEM to remove extracellular bacteria. To enumerate CFU, at specified time points  
436 macrophages were lysed with 0.06% sodium dodecyl sulfate (SDS) in water and serially diluted in PBS.  
437 The cell lysates were plated on 7H11 agar plates supplemented with OADC and glycerol, and CFU  
438 were counted after 14-21 days. For qPCR, macrophages were lysed in TRI Reagent (Zymo Research,  
439 R2050-1-50), and total RNA was extracted.

440

#### 441 **Alveolar macrophage isolation and infection**

442 Mice were euthanized with 1 mg isofluorane instilled in a cotton ball. The trachea was exposed, incised  
443 with a small horizontal cut, and cannulated with an 18-gauge catheter. 8 washes with 1 mL wash buffer  
444 (ice-cold PBS, 2 mM EDTA, 1% FBS) were performed. Cells were washed and seeded in alveolar  
445 macrophage media [DMEM with 10% L929 cell supernatant, 10% FBS, 1 mM pyruvate, and 10 mM N-  
446 2-hydroxyethylpiperazine-N'-2-ethanesulphonic acid (HEPES)] and infected the same day as described  
447 above for BMDM infections.

448

#### 449 **RNA sequencing**

450 Mouse hematopoietic cells were collected and differentiated to BMDMs as above.  $1.6 \times 10^6$  BMDMs per  
451 well were incubated overnight in a six-well plate. BMDMs were either uninfected or infected at a MOI of  
452 5 with Mtb prepared by the designated single cell preparation method. 5 samples per group were used.  
453 At 72 hpi, macrophages were lysed in TRI Reagent and total RNA was extracted. Total RNA integrity  
454 was determined using Agilent Bioanalyzer or 4200 TapeStation. Library preparation was performed with  
455 500ng to 1ug total RNA. Ribosomal RNA was removed by an RNase-H method using RiboErase kits  
456 (Kapa Biosystems). mRNA was then fragmented in reverse transcriptase buffer and heating to 94°C for  
457 8 min. mRNA was reverse transcribed to yield cDNA using SuperScript III RT enzyme (Life  
458 Technologies, per manufacturer's instructions) and random hexamers. A second strand reaction was

459 performed to yield ds-cDNA. cDNA was blunt ended, had an A base added to the 3' ends, and then had  
460 Illumina sequencing adapters ligated to the ends. Ligated fragments were then amplified for 12-15  
461 cycles using primers incorporating unique dual index tags. Fragments were sequenced on an Illumina  
462 NovaSeq-6000 using paired end reads extending 150 bases. The raw CPM values that were generated  
463 underwent filtering, with removal of mitochondrial RNA, autosomal rRNA, and low-expressed genes  
464 with less than 1 CPM in the smallest group size, followed by Voom transformation of counts.  
465 Differentially expressed genes were then determined using the “limma” package from bioconductor.org.  
466 Heatmaps were generated in R using the “pheatmap” package.

467

### 468 **Gene set enrichment analysis**

469 We imputed normalized gene expression data and associated Ensembl Stable IDs of differentially  
470 expressed genes from our RNA-seq experiment into GSEA software. GSEA then analyzed our dataset  
471 for enriched genetic signatures curated in the hallmark gene sets by the Molecular Signatures Database  
472 (Liberzon et al., 2015; Subramanian et al., 2005). Genes were ranked based on their expression and  
473 compared against the hallmark gene sets in order to generate an enrichment score. A nominal P value  
474 was then generated followed by normalization for the size of the gene set and adjustment for multiple  
475 hypothesis testing to yield a false discovery rate (FDR) as previously described (Subramanian et al.,  
476 2005). Gene sets which had a P-value <0.01 and an FDR <0.01 were considered significant.

477

### 478 **Quantitative Polymerase Chain Reaction**

479 BMDMs ( $2.0 \times 10^5$ ) were plated in 24 well plates. At indicated time points, macrophage growth media  
480 was aspirated, and 100 $\mu$ L TRIzol (Zymo Research, R2050-1-50) was added to each well followed by  
481 isolation of total RNA using Direct-Zol RNA Mini-Prep Plus Kit (Zymo Research, R1058) according to  
482 the manufacturer's instructions. RNA concentrations were determined using NanoDrop One  
483 (ThermoScientific), and cDNA was made with High Capacitance cDNA Reverse Transcription Kit  
484 (Thermo-Fisher). Quantitative PCR was performed using SYBR Green dye (Bio-Rad CFX Connect



485 Real-Time System). Fold-changes in gene expression were calculating by normalizing data to *Gapdh*  
486 as a house-keeping gene and values were presented relative to uninfected cells. For analysis of whole  
487 lung gene expression, the left lungs were placed in 800  $\mu$ L TRIzol and lysed using bead beating with  
488 3.2 mm stainless steel beads (BioSpec Products) with three 90 s cycles. Samples were cooled on ice  
489 between cycles. Samples were centrifuged at 15,000 x g for 5 min; the supernatant was filtered through  
490 0.22  $\mu$ m filters and used to isolate total RNA with the Direct-Zol RNA Mini-Prep Plus Kit. The nucleotide  
491 sequences of all primers used are presented in **Supplemental Table 2**.

492

### 493 **Fluorescence microscopy**

494 BMDMs ( $3 \times 10^4$ ) were seeded in glass bottom 96-well plate (Ibidi, catalog number 89626) and infected  
495 with GFP-expressing H37Rv at a MOI of 5. After 4 h, macrophages were washed with PBS and fixed  
496 with 1% paraformaldehyde in PBS overnight followed by permeabilization in 0.1% vol/vol Triton X-100  
497 (Millipore Sigma) in PBS for 10 min at room temperature (RT) and blocked for 45 min in 2% bovine  
498 serum albumin (BSA) in PBS prior to staining with DAPI (4',6-diamidino-2-phenylindole) and mounted  
499 in Prolong Diamond antifade (Molecular Probes, Life Technologies). Images were captured using a  
500 Nikon Eclipse Ti confocal microscope (Nikon Instruments, Inc.) equipped with a 60X apochromat oil  
501 objective lens. Image acquisition was done using NIS-Elements version 4.40.

502

### 503 **ELISA**

504 For *in vitro* samples,  $2.0 \times 10^5$  BMDM in 24 well plates were infected with Mtb at a MOI of 10. At the  
505 indicated timepoints, the cell supernatant was collected and filtered through 0.22  $\mu$ m filters. For lung  
506 samples, tissue was homogenized in 2mL PBS, centrifuged at 400 x g for 5 min to pellet cellular debris,  
507 then the supernatant was filtered using a 96-well 0.22  $\mu$ m filter plate. Cytokines were measured from  
508 the supernatant with R&D Systems DuoSet ELISA kits for TNF- $\alpha$ , IL1B, and IL6 according to the  
509 manufacturer's instructions (R&D Systems, cat. DY406, DY410, DY411). Three biological samples per



510 condition were tested in technical duplicate, and experiments were repeated at least two times per  
511 experimental condition.

512

### 513 **FluoroDOT assay**

514 Assays were performed using reagents from Mouse TNF- $\alpha$  DuoSet ELISA kits (R&D systems, catalog  
515 number DY410-05). Wells of 96 well glass-bottom, black plates (P96-1.5H-N, Cellvis, Mountain View,  
516 USA) were coated with 100 $\mu$ L TNF- $\alpha$  capture antibody (2  $\mu$ g/mL in PBS) at 4°C overnight. Coated wells  
517 were then washed 3 times with PBS, followed by blocking with reagent diluent (0.2 $\mu$ m filtered 1% BSA  
518 in PBS) for at least 1 h at RT. Wells were washed 3 times with PBS and thereafter 8.0 x 10<sup>3</sup> BMDMs in  
519 DMEM complete with 10% L cell supernatant were added to each well. The same day, BMDMs were  
520 infected with the indicated GFP-expressing Mtb strains that had prepared as single cell suspensions.  
521 Macrophages were incubated at 37°C in 5% CO<sub>2</sub> for 3 h, followed by 3 washes with fresh media to  
522 remove extracellular Mtb, and incubated in the same media for an additional 3 h. Media was then  
523 aspirated and 200 $\mu$ L 4% PFA in PBS was added for 30 min at 37°C. Wells were washed with PBS and  
524 incubated with biotinylated 75 ng/mL TNF- $\alpha$  detection antibody in reagent diluent for 2 h at RT. Wells  
525 were washed 3 times with PBS followed by 100 $\mu$ L PBS containing streptavidin plasmonic-fluor 650  
526 (PF650, extinction 0.5; Auragent Bioscience LLC) (Wang et al., 2021) for 30 min at RT in the dark. Cells  
527 were washed 3 times with PBS and stained with 300nM DAPI (Millipore Sigma) for 5 min at RT in the  
528 dark. Wells were washed 3 times with PBS and then visualized using a Nikon TsR2 epifluorescence  
529 microscope.

530

### 531 **Aerosol infection of mice**

532 Mtb was grown to mid-log phase (OD<sub>600</sub> 0.5-0.8), centrifuged at 3000 x g, washed with PBS, and  
533 resuspended in sterile water with 0.05% Tween-80. Single cell suspensions were generated using the  
534 methods described above. Suspensions were diluted in sterile water with 0.05% Tween-80 to achieve  
535 a final concentration of 1 x 10<sup>5</sup> bacteria/mL for the sp and so/sp preparations, and 2 x 10<sup>5</sup> bacteria/mL

536 for the 5 $\mu$ mF preparation, which yielded an inoculum of approximately 100 CFU. 5 mL of the bacterial  
537 suspension was aerosolized using a Glas-Col inhalation exposure system as previously described (Wolf  
538 et al., 2007). Three male and three female, total six mice were used in each group. The initial bacterial  
539 burden was confirmed by plating lung homogenates on 7H11 + 10% OADC on the day following  
540 infection. At the indicated time points, mice were euthanized with CO<sub>2</sub>. Following euthanasia, lungs and  
541 spleens were extracted using aseptic technique and placed in 2 mL PBS. Lungs and spleens were  
542 homogenized, and serial dilutions were plated on 7H11 Middlebrook agar. In most of the experiments,  
543 the left lung was excised, placed in RNAlater (Invitrogen, AM7020), stored at 80°C, followed by RNA  
544 extraction using TRIzol as described above, while the right lung was homogenized in PBS and  
545 processed for CFU. CFU were enumerated 14 to 21 days after plating.

546

#### 547 **Transmission electron microscopy**

548 Bacteria were grown to mid-log phase, and single cell suspensions were generated in PBS as described  
549 above. Bacteria were incubated in 4% PFA for 30 min at 37°C followed by centrifugation at 3000 x g  
550 and resuspension in PBS. For ultrastructural analyses using ultrathin cross-sections through bacteria,  
551 samples were further fixed in 2% paraformaldehyde/2.5% glutaraldehyde (Ted Pella Inc., Redding, CA)  
552 in 100 mM sodium cacodylate buffer, pH 7.2 for 2h at RT and then overnight at 4°C. Samples were  
553 washed in sodium cacodylate buffer at RT and postfixed in 2% osmium tetroxide (Ted Pella Inc) for 1h  
554 at RT. Samples were then rinsed in dH<sub>2</sub>O, dehydrated in a graded series of ethanol, and embedded in  
555 Eponate 12 resin (Ted Pella Inc). Sections of 95 nm were cut with a Leica Ultracut UCT ultramicrotome  
556 (Leica Microsystems Inc., Bannockburn, IL), stained with uranyl acetate and lead citrate, and viewed  
557 on a JEOL 1200 EX transmission electron microscope (JEOL USA Inc., Peabody, MA) equipped with  
558 an AMT 8-megapixel digital camera and AMT Image Capture Engine V602 software (Advanced  
559 Microscopy Techniques, Woburn, MA).

560

561 For analyses of whole bacteria, after bacterial samples were fixed with 4% PFA, they were allowed to  
562 adsorb onto freshly glow discharged formvar/carbon-coated copper grids for 10 min. Grids were then

563 washed in dH<sub>2</sub>O and stained with 1% aqueous uranyl acetate (Ted Pella Inc.) for 1 min. Excess liquid  
564 was gently wicked off, and grids were allowed to air dry. Samples were viewed by transmission electron  
565 microscopy as described above.

566

### 567 **Methodology of literature review**

568 We conducted a search in PubMed using the medical subject headings “*Mycobacterium tuberculosis*”  
569 and “Macrophage” and filtered for articles published in 2021. This generated 183 articles, which were  
570 further filtered to include only original research articles by removing review articles, protocols, and  
571 commentaries. The remaining 155 articles were included in the analysis if they performed an *in vitro*  
572 macrophage infection with live Mtb. The text, supplementary methods, and figures were reviewed to  
573 determine the single cell preparation methods used.

574

### 575 **Statistical analysis**

576 Graph Pad Prism 9 software was used for statistical analysis and to prepare graphs. Error bars used in  
577 the figures correspond to the mean and standard deviation. Statistical significance was determined  
578 using unpaired T test, one-way analysis of variance (ANOVA), or two-way ANOVA, as indicated.

579

### 580 **Acknowledgements**

581 We thank members of the Philips laboratory for their input. Funding for these studies came from  
582 NIAID/NIH (R01 AI087682 and AI30454) to JAP, and the National Cancer Institute (NCI)-Innovative  
583 Molecular Analysis Technologies (R21CA236652) and National Science Foundation (CBET-1900277)  
584 to SS. ATR was supported by NIH/NHLBI (T32 HL007317-37). We thank the Genome Technology  
585 Access Center at Washington University School of Medicine for help with genomic analysis. The Center  
586 is partially supported by NCI Cancer Center Support Grant #P30 CA91842 to the Siteman Cancer  
587 Center and by ICTS/CTSA Grant# UL1TR002345 from the National Center for Research  
588 Resources (NCRR), a component of the National Institutes of Health (NIH), and NIH Roadmap

589 for Medical Research. This publication is solely the responsibility of the authors and does not  
590 necessarily represent the official view of NCRR or NIH.

591

#### 592 **Data availability**

593 RNA-seq data will be deposited in a repository and made available.

594

#### 595 **Competing interests**

596 SS is an inventor on a provisional patent related to plasmonic-fluor technology, and the technology has  
597 been licensed by the Office of Technology Management at Washington University in St. Louis to  
598 Auragent Bioscience LLC. SS is a co-founder/shareholder of Auragent Bioscience LLC. SS along with  
599 Washington University may have financial gain through Auragent Bioscience LLC through this licensing  
600 agreement. AS is currently employed with Auragent Bioscience LLC. These potential conflicts of  
601 interest have been disclosed and are being managed by Washington University in St. Louis.

602

#### 603 **Author contributions**

604 The project was conceptualized by EM and JAP. All experiments were performed by EM and AR, and  
605 formal analysis was performed by AR, EM, and JAP. AS performed FluroDOT experiments. SS  
606 supervised FluroDOT studies. WB performed electron microscopy experiments. Funding was acquired  
607 by JAP and SS. Writing of the original draft was done by AR, EM, and JAP. Editing of the manuscript  
608 was done by all authors. JAP supervised the studies. EM and AR share the first author position,  
609 reflecting their equivalent contributions.

610

611

#### 612 **References**

613

614 Astarie-Dequeker, C., Le Guyader, L., Malaga, W., Seaphanh, F. K., Chalut, C., Lopez, A., & Guilhot,  
615 C. (2009). Phthiocerol dimycocerosates of *M. tuberculosis* participate in macrophage invasion

- 616 by inducing changes in the organization of plasma membrane lipids. *PLoS Pathog*, 5(2),  
617 e1000289. <https://doi.org/10.1371/journal.ppat.1000289>
- 618 Athman, J. J., Wang, Y., McDonald, D. J., Boom, W. H., Harding, C. V., & Wearsch, P. A. (2015).  
619 Bacterial Membrane Vesicles Mediate the Release of Mycobacterium tuberculosis Lipoglycans  
620 and Lipoproteins from Infected Macrophages. *J Immunol*, 195(3), 1044-1053.  
621 <https://doi.org/10.4049/jimmunol.1402894>
- 622 Augenstreich, J., Arbues, A., Simeone, R., Haanappel, E., Wegener, A., Sayes, F., Le Chevalier, F.,  
623 Chalut, C., Malaga, W., Guilhot, C., Brosch, R., & Astarie-Dequeker, C. (2017). ESX-1 and  
624 phthiocerol dimycocerosates of Mycobacterium tuberculosis act in concert to cause  
625 phagosomal rupture and host cell apoptosis. *Cell Microbiol*, 19(7).  
626 <https://doi.org/10.1111/cmi.12726>
- 627 Banaiee, N., Kincaid, E. Z., Buchwald, U., Jacobs, W. R., Jr., & Ernst, J. D. (2006). Potent inhibition of  
628 macrophage responses to IFN-gamma by live virulent Mycobacterium tuberculosis is  
629 independent of mature mycobacterial lipoproteins but dependent on TLR2. *J Immunol*, 176(5),  
630 3019-3027. <https://doi.org/10.4049/jimmunol.176.5.3019>
- 631 Barczak, A. K., Avraham, R., Singh, S., Luo, S. S., Zhang, W. R., Bray, M. A., Hinman, A. E.,  
632 Thompson, M., Nietupski, R. M., Golas, A., Montgomery, P., Fitzgerald, M., Smith, R. S.,  
633 White, D. W., Tischler, A. D., Carpenter, A. E., & Hung, D. T. (2017). Systematic,  
634 multiparametric analysis of Mycobacterium tuberculosis intracellular infection offers insight into  
635 coordinated virulence. *PLoS Pathog*, 13(5), e1006363.  
636 <https://doi.org/10.1371/journal.ppat.1006363>
- 637 Blanc, L., Gilleron, M., Prandi, J., Song, O. R., Jang, M. S., Gicquel, B., Drocourt, D., Neyrolles, O.,  
638 Brodin, P., Tiraby, G., Vercellone, A., & Nigou, J. (2017). Mycobacterium tuberculosis inhibits

- 639 human innate immune responses via the production of TLR2 antagonist glycolipids. *Proc Natl*  
640 *Acad Sci U S A*, 114(42), 11205-11210. <https://doi.org/10.1073/pnas.1707840114>
- 641 Camacho, L. R., Constant, P., Raynaud, C., Laneelle, M. A., Triccas, J. A., Gicquel, B., Daffe, M., &  
642 Guilhot, C. (2001). Analysis of the phthiocerol dimycocerosate locus of *Mycobacterium*  
643 tuberculosis. Evidence that this lipid is involved in the cell wall permeability barrier. *J Biol*  
644 *Chem*, 276(23), 19845-19854. <https://doi.org/10.1074/jbc.M100662200>
- 645 Cambier, C. J., Banik, S. M., Buonomo, J. A., & Bertozzi, C. R. (2020). Spreading of a mycobacterial  
646 cell-surface lipid into host epithelial membranes promotes infectivity. *Elife*, 9.  
647 <https://doi.org/10.7554/eLife.60648>
- 648 Cambier, C. J., Takaki, K. K., Larson, R. P., Hernandez, R. E., Tobin, D. M., Urdahl, K. B., Cosma, C.  
649 L., & Ramakrishnan, L. (2014). Mycobacteria manipulate macrophage recruitment through  
650 coordinated use of membrane lipids. *Nature*, 505(7482), 218-222.  
651 <https://doi.org/10.1038/nature12799>
- 652 Cheng, N., Porter, M. A., Frick, L. W., Nguyen, Y., Hayden, J. D., Young, E. F., Braunstein, M. S.,  
653 Hull-Ryde, E. A., & Janzen, W. P. (2014). Filtration improves the performance of a high-  
654 throughput screen for anti-mycobacterial compounds. *PLoS One*, 9(5), e96348.  
655 <https://doi.org/10.1371/journal.pone.0096348>
- 656 Cohen, S. B., Gern, B. H., Delahaye, J. L., Adams, K. N., Plumlee, C. R., Winkler, J. K., Sherman, D.  
657 R., Gerner, M. Y., & Urdahl, K. B. (2018). Alveolar Macrophages Provide an Early  
658 *Mycobacterium tuberculosis* Niche and Initiate Dissemination. *Cell Host Microbe*, 24(3), 439-  
659 446.e434. <https://doi.org/10.1016/j.chom.2018.08.001>
- 660 Cox, J. S., Chen, B., McNeil, M., & Jacobs, W. R., Jr. (1999). Complex lipid determines tissue-specific  
661 replication of *Mycobacterium tuberculosis* in mice. *Nature*, 402(6757), 79-83.

- 662 Dinkele, R., Gessner, S., McKerry, A., Leonard, B., Seldon, R., Koch, A. S., Morrow, C., Gqada, M.,  
663 Kamariza, M., Bertozzi, C. R., Smith, B., McCloud, C., Kamholz, A., Bryden, W., Call, C.,  
664 Kaplan, G., Mizrahi, V., Wood, R., & Warner, D. F. (2021). Capture and visualization of live  
665 *Mycobacterium tuberculosis* bacilli from tuberculosis patient bioaerosols. *PLoS Pathog*, *17*(2),  
666 e1009262. <https://doi.org/10.1371/journal.ppat.1009262>
- 667 Dulberger, C. L., Rubin, E. J., & Boutte, C. C. (2020). The mycobacterial cell envelope - a moving  
668 target. *Nat Rev Microbiol*, *18*(1), 47-59. <https://doi.org/10.1038/s41579-019-0273-7>
- 669 Garcia-Vilanova, A., Chan, J., & Torrelles, J. B. (2019). Underestimated Manipulative Roles  
670 of *Mycobacterium tuberculosis* Cell Envelope Glycolipids During Infection. *Front Immunol*, *10*,  
671 2909. <https://doi.org/10.3389/fimmu.2019.02909>
- 672 Hinman, A. E., Jani, C., Pringle, S. C., Zhang, W. R., Jain, N., Martinot, A. J., & Barczak, A. K. (2021).  
673 *Mycobacterium tuberculosis* canonical virulence factors interfere with a late component of the  
674 TLR2 response. *Elife*, *10*. <https://doi.org/10.7554/eLife.73984>
- 675 Huang, L., Nazarova, E. V., Tan, S., Liu, Y., & Russell, D. G. (2018). Growth of *Mycobacterium*  
676 *tuberculosis* in vivo segregates with host macrophage metabolism and ontogeny. *J Exp Med*,  
677 *215*(4), 1135-1152. <https://doi.org/10.1084/jem.20172020>
- 678 Kalscheuer, R., Palacios, A., Anso, I., Cifuentes, J., Anguita, J., Jacobs, W. R., Guerin, M. E., &  
679 Prados-Rosales, R. (2019). The *Mycobacterium tuberculosis* capsule: a cell structure with key  
680 implications in pathogenesis. *Biochem J*, *476*(14), 1995-2016.  
681 <https://doi.org/10.1042/BCJ20190324>
- 682 Kolloli, A., Kumar, R., Singh, P., Narang, A., Kaplan, G., Sigal, A., & Subbian, S. (2021). Aggregation  
683 state of *Mycobacterium tuberculosis* impacts host immunity and augments pulmonary disease  
684 pathology. *Commun Biol*, *4*(1), 1256. <https://doi.org/10.1038/s42003-021-02769-9>



- 685 Lavalett, L., Rodriguez, H., Ortega, H., Sadee, W., Schlesinger, L. S., & Barrera, L. F. (2017). Alveolar  
686 macrophages from tuberculosis patients display an altered inflammatory gene expression  
687 profile. *Tuberculosis (Edinb)*, 107, 156-167. <https://doi.org/10.1016/j.tube.2017.08.012>
- 688 Lemassu, A., & Daffe, M. (1994). Structural features of the exocellular polysaccharides of  
689 *Mycobacterium tuberculosis*. *Biochem J*, 297 ( Pt 2), 351-357.  
690 <https://doi.org/10.1042/bj2970351>
- 691 Lemassu, A., Ortalo-Magne, A., Bardou, F., Silve, G., Laneelle, M. A., & Daffe, M. (1996).  
692 Extracellular and surface-exposed polysaccharides of non-tuberculous mycobacteria.  
693 *Microbiology (Reading)*, 142 ( Pt 6), 1513-1520. <https://doi.org/10.1099/13500872-142-6-1513>
- 694 Lerner, T. R., Queval, C. J., Fearn, A., Repnik, U., Griffiths, G., & Gutierrez, M. G. (2018).  
695 Phthiocerol dimycocerosates promote access to the cytosol and intracellular burden of  
696 *Mycobacterium tuberculosis* in lymphatic endothelial cells. *BMC Biol*, 16(1), 1.  
697 <https://doi.org/10.1186/s12915-017-0471-6>
- 698 Liang, C., Luan, J., Wang, Z., Jiang, Q., Gupta, R., Cao, S., Liu, K. K., Morrissey, J. J., Kharasch, E.  
699 D., Naik, R. R., & Singamaneni, S. (2021). Gold Nanorod Size-Dependent Fluorescence  
700 Enhancement for Ultrasensitive Fluoroimmunoassays. *ACS Appl Mater Interfaces*, 13(9),  
701 11414-11423. <https://doi.org/10.1021/acsami.0c20303>
- 702 Liberzon, A., Birger, C., Thorvaldsdottir, H., Ghandi, M., Mesirov, J. P., & Tamayo, P. (2015). The  
703 Molecular Signatures Database (MSigDB) hallmark gene set collection. *Cell Syst*, 1(6), 417-  
704 425. <https://doi.org/10.1016/j.cels.2015.12.004>
- 705 Mahamed, D., Boule, M., Ganga, Y., Mc Arthur, C., Skroch, S., Oom, L., Catinas, O., Pillay, K.,  
706 Naicker, M., Rampersad, S., Mathonsi, C., Hunter, J., Wong, E. B., Suleman, M., Sreejit, G.,  
707 Pym, A. S., Lustig, G., & Sigal, A. (2017). Intracellular growth of *Mycobacterium tuberculosis*



- 708 after macrophage cell death leads to serial killing of host cells. *Elife*, 6.  
709 <https://doi.org/10.7554/eLife.22028>
- 710 Murry, J. P., Pandey, A. K., Sassetti, C. M., & Rubin, E. J. (2009). Phthiocerol dimycocerosate  
711 transport is required for resisting interferon-gamma-independent immunity. *J Infect Dis*, 200(5),  
712 774-782. <https://doi.org/10.1086/605128>
- 713 Ortalo-Magne, A., Dupont, M. A., Lemassu, A., Andersen, A. B., Gounon, P., & Daffe, M. (1995).  
714 Molecular composition of the outermost capsular material of the tubercle bacillus. *Microbiology*  
715 (*Reading*), 141 ( Pt 7), 1609-1620. <https://doi.org/10.1099/13500872-141-7-1609>
- 716 Osman, M. M., Pagán, A. J., Shanahan, J. K., & Ramakrishnan, L. (2020). Mycobacterium marinum  
717 phthiocerol dimycocerosates enhance macrophage phagosomal permeabilization and  
718 membrane damage. *PLoS One*, 15(7), e0233252.  
719 <https://doi.org/10.1371/journal.pone.0233252>
- 720 Palacios, A., Gupta, S., Rodriguez, G. M., & Prados-Rosales, R. (2021). Extracellular vesicles in the  
721 context of Mycobacterium tuberculosis infection. *Mol Immunol*, 133, 175-181.  
722 <https://doi.org/10.1016/j.molimm.2021.02.010>
- 723 Pisu, D., Huang, L., Grenier, J. K., & Russell, D. G. (2020). Dual RNA-Seq of Mtb-Infected  
724 Macrophages In Vivo Reveals Ontologically Distinct Host-Pathogen Interactions. *Cell Rep*,  
725 30(2), 335-350.e334. <https://doi.org/10.1016/j.celrep.2019.12.033>
- 726 Prados-Rosales, R., Baena, A., Martinez, L. R., Luque-Garcia, J., Kalscheuer, R., Veeraraghavan, U.,  
727 Camara, C., Nosanchuk, J. D., Besra, G. S., Chen, B., Jimenez, J., Glatman-Freedman, A.,  
728 Jacobs, W. R., Jr., Porcelli, S. A., & Casadevall, A. (2011). Mycobacteria release active  
729 membrane vesicles that modulate immune responses in a TLR2-dependent manner in mice. *J*  
730 *Clin Invest*, 121(4), 1471-1483. <https://doi.org/10.1172/JCI44261>

- 731 Prados-Rosales, R., Carreno, L. J., Weinrick, B., Batista-Gonzalez, A., Glatman-Freedman, A., Xu, J.,  
732 Chan, J., Jacobs, W. R., Jr., Porcelli, S. A., & Casadevall, A. (2016). The Type of Growth  
733 Medium Affects the Presence of a Mycobacterial Capsule and Is Associated With Differences  
734 in Protective Efficacy of BCG Vaccination Against Mycobacterium tuberculosis. *J Infect Dis*,  
735 214(3), 426-437. <https://doi.org/10.1093/infdis/jiw153>
- 736 Quigley, J., Hughitt, V. K., Velikovsky, C. A., Mariuzza, R. A., El-Sayed, N. M., & Briken, V. (2017).  
737 The Cell Wall Lipid PDIM Contributes to Phagosomal Escape and Host Cell Exit of  
738 Mycobacterium tuberculosis. *mBio*, 8(2). <https://doi.org/10.1128/mBio.00148-17>
- 739 Reed, M. B., Domenech, P., Manca, C., Su, H., Barczak, A. K., Kreiswirth, B. N., Kaplan, G., & Barry,  
740 C. E. (2004). A glycolipid of hypervirulent tuberculosis strains that inhibits the innate immune  
741 response. *Nature*, 431(7004), 84-87. <https://doi.org/10.1038/nature02837>
- 742 Rodel, H. E., Ferreira, I., Ziegler, C. G. K., Ganga, Y., Bernstein, M., Hwa, S. H., Nargan, K., Lustig,  
743 G., Kaplan, G., Noursadeghi, M., Shalek, A. K., Steyn, A. J. C., & Sigal, A. (2021). Aggregated  
744 Mycobacterium tuberculosis Enhances the Inflammatory Response. *Front Microbiol*, 12,  
745 757134. <https://doi.org/10.3389/fmicb.2021.757134>
- 746 Rothchild, A. C., Olson, G. S., Nemeth, J., Amon, L. M., Mai, D., Gold, E. S., Diercks, A. H., &  
747 Aderem, A. (2019). Alveolar macrophages generate a noncanonical NRF2-driven  
748 transcriptional response to Mycobacterium tuberculosis in vivo. *Sci Immunol*, 4(37).  
749 <https://doi.org/10.1126/sciimmunol.aaw6693>
- 750 Rousseau, C., Winter, N., Pivert, E., Bordat, Y., Neyrolles, O., Ave, P., Huerre, M., Gicquel, B., &  
751 Jackson, M. (2004). Production of phthiocerol dimycocerosates protects Mycobacterium  
752 tuberculosis from the cidal activity of reactive nitrogen intermediates produced by  
753 macrophages and modulates the early immune response to infection. *Cell Microbiol*, 6(3), 277-  
754 287. <https://doi.org/10.1046/j.1462-5822.2004.00368.x>

- 755 Sani, M., Houben, E. N., Geurtsen, J., Pierson, J., de Punder, K., van Zon, M., Wever, B., Piersma, S.  
756 R., Jimenez, C. R., Daffe, M., Appelmelk, B. J., Bitter, W., van der Wel, N., & Peters, P. J.  
757 (2010). Direct visualization by cryo-EM of the mycobacterial capsular layer: a labile structure  
758 containing ESX-1-secreted proteins. *PLoS Pathog*, 6(3), e1000794.  
759 <https://doi.org/10.1371/journal.ppat.1000794>
- 760 Siméone, R., Constant, P., Malaga, W., Guilhot, C., Daffé, M., & Chalut, C. (2007). Molecular  
761 dissection of the biosynthetic relationship between phthiocerol and phthiodiolone  
762 dimycocerosates and their critical role in the virulence and permeability of *Mycobacterium*  
763 *tuberculosis*. *FEBS J*, 274(8), 1957-1969. <https://doi.org/10.1111/j.1742-4658.2007.05740.x>
- 764 Stokes, R. W., Norris-Jones, R., Brooks, D. E., Beveridge, T. J., Doxsee, D., & Thorson, L. M. (2004).  
765 The glycan-rich outer layer of the cell wall of *Mycobacterium tuberculosis* acts as an  
766 antiphagocytic capsule limiting the association of the bacterium with macrophages. *Infect*  
767 *Immun*, 72(10), 5676-5686. <https://doi.org/10.1128/IAI.72.10.5676-5686.2004>
- 768 Stukalov, O., Korenevsky, A., Beveridge, T. J., & Dutcher, J. R. (2008). Use of atomic force  
769 microscopy and transmission electron microscopy for correlative studies of bacterial capsules.  
770 *Appl Environ Microbiol*, 74(17), 5457-5465. <https://doi.org/10.1128/AEM.02075-07>
- 771 Subramanian, A., Tamayo, P., Mootha, V. K., Mukherjee, S., Ebert, B. L., Gillette, M. A., Paulovich,  
772 A., Pomeroy, S. L., Golub, T. R., Lander, E. S., & Mesirov, J. P. (2005). Gene set enrichment  
773 analysis: a knowledge-based approach for interpreting genome-wide expression profiles. *Proc*  
774 *Natl Acad Sci U S A*, 102(43), 15545-15550. <https://doi.org/10.1073/pnas.0506580102>
- 775 Ufimtseva, E. G., Eremeeva, N. I., Petrunina, E. M., Umpeleva, T. V., Bayborodin, S. I., Vakhrusheva,  
776 D. V., & Skornyakov, S. N. (2018). *Mycobacterium tuberculosis* cording in alveolar  
777 macrophages of patients with pulmonary tuberculosis is likely associated with increased

- 778 mycobacterial virulence. *Tuberculosis (Edinb)*, 112, 1-10.
- 779 <https://doi.org/10.1016/j.tube.2018.07.001>
- 780 Vijay, S., Hai, H. T., Thu, D. D. A., Johnson, E., Pielach, A., Phu, N. H., Thwaites, G. E., & Thuong, N.
- 781 T. T. (2017). Ultrastructural Analysis of Cell Envelope and Accumulation of Lipid Inclusions in
- 782 Clinical Mycobacterium tuberculosis Isolates from Sputum, Oxidative Stress, and Iron
- 783 Deficiency. *Front Microbiol*, 8, 2681. <https://doi.org/10.3389/fmicb.2017.02681>
- 784 Wang, Z., Luan, J., Seth, A., Liu, L., You, M., Gupta, P., Rathi, P., Wang, Y., Cao, S., Jiang, Q.,
- 785 Zhang, X., Gupta, R., Zhou, Q., Morrissey, J. J., Scheller, E. L., Rudra, J. S., & Singamaneni,
- 786 S. (2021). Microneedle patch for the ultrasensitive quantification of protein biomarkers in
- 787 interstitial fluid. *Nat Biomed Eng*, 5(1), 64-76. <https://doi.org/10.1038/s41551-020-00672-y>
- 788 Wells, W. F. (1946). A Method for Obtaining Standard Suspensions of Tubercle Bacilli in the Form of
- 789 Single Cells. *Science*, 104(2698), 254-255. <https://doi.org/10.1126/science.104.2698.254>
- 790 Wolf, A. J., Linas, B., Trevejo-Nunez, G. J., Kincaid, E., Tamura, T., Takatsu, K., & Ernst, J. D. (2007).
- 791 Mycobacterium tuberculosis infects dendritic cells with high frequency and impairs their
- 792 function in vivo. *J Immunol*, 179(4), 2509-2519. <https://doi.org/10.4049/jimmunol.179.4.2509>
- 793
- 794

Figure 1

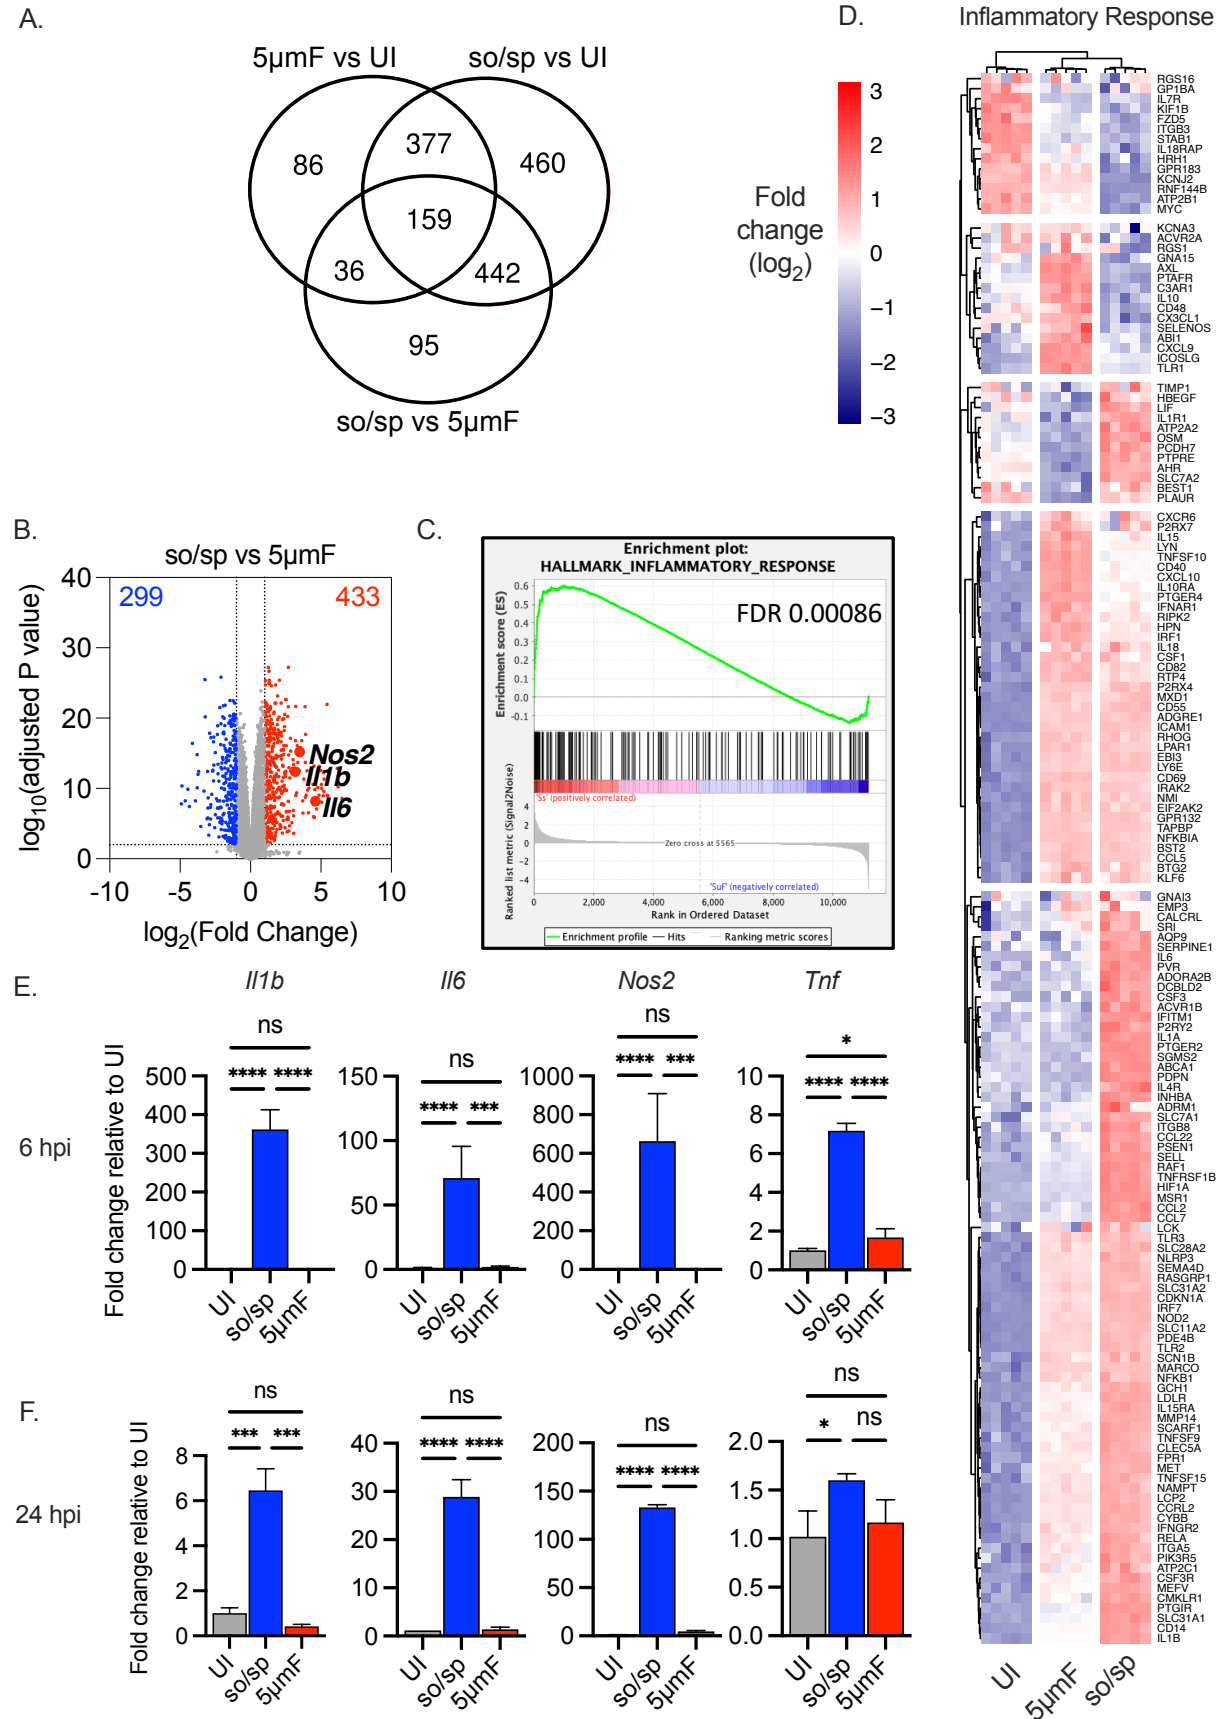

796 **Figure 1. Cell preparation methods of Mtb impact macrophage responses**

797 **(A-D)** BMDMs were uninfected or infected with Mtb prepared by sonication and spin (so/sp) or filtration  
798 (5 $\mu$ mF) at an MOI of 5 and analyzed 72 hpi by RNA-seq (n=5 per condition). **(A)** Venn diagram illustrates  
799 the number of DEGs between samples. **(B)** Volcano plot shows genes differentially expressed in  
800 BMDMs infected with so/sp versus 5 $\mu$ mF Mtb. DEGs exhibiting an adjusted P-value of  $\leq 0.01$  and a  
801 linear fold change  $\geq 2.00$  (red) or  $\leq 2.00$  (blue) are indicated. **(C-D)** GSEA identified hallmark gene sets  
802 that were significantly enriched in so/sp- versus 5 $\mu$ mF-infected BMDMs (P  $\leq 0.01$ ; FDR  $\leq 0.01$ ).  
803 Representative enrichment plot (C) and corresponding heat map (D) for the gene set “inflammatory  
804 response.” Expression values in heatmap were generated using log<sub>2</sub> normalized CPM for each gene.  
805 **(E and F)** qPCR was performed on uninfected BMDMs or BMDMs infected with so/sp- or 5 $\mu$ mF-  
806 prepared Mtb at 6 (E) and 24 (F) hpi using an MOI of 10. Data are shown as fold change in gene  
807 expression relative to uninfected BMDMs. Data shown are mean  $\pm$  SD from one representative  
808 experiment with 3 biological and 2 technical replicates for each group. qPCR experiments were  
809 performed at least 3 independent times. Statistical significance was determined with one-way ANOVA  
810 using Tukey’s multiple comparisons test. (A-F) Error bars indicate mean  $\pm$  SD. ns not significant;  
811 \*P<0.05; \*\*\*< 0.001; \*\*\*\*< 0.0001.

812

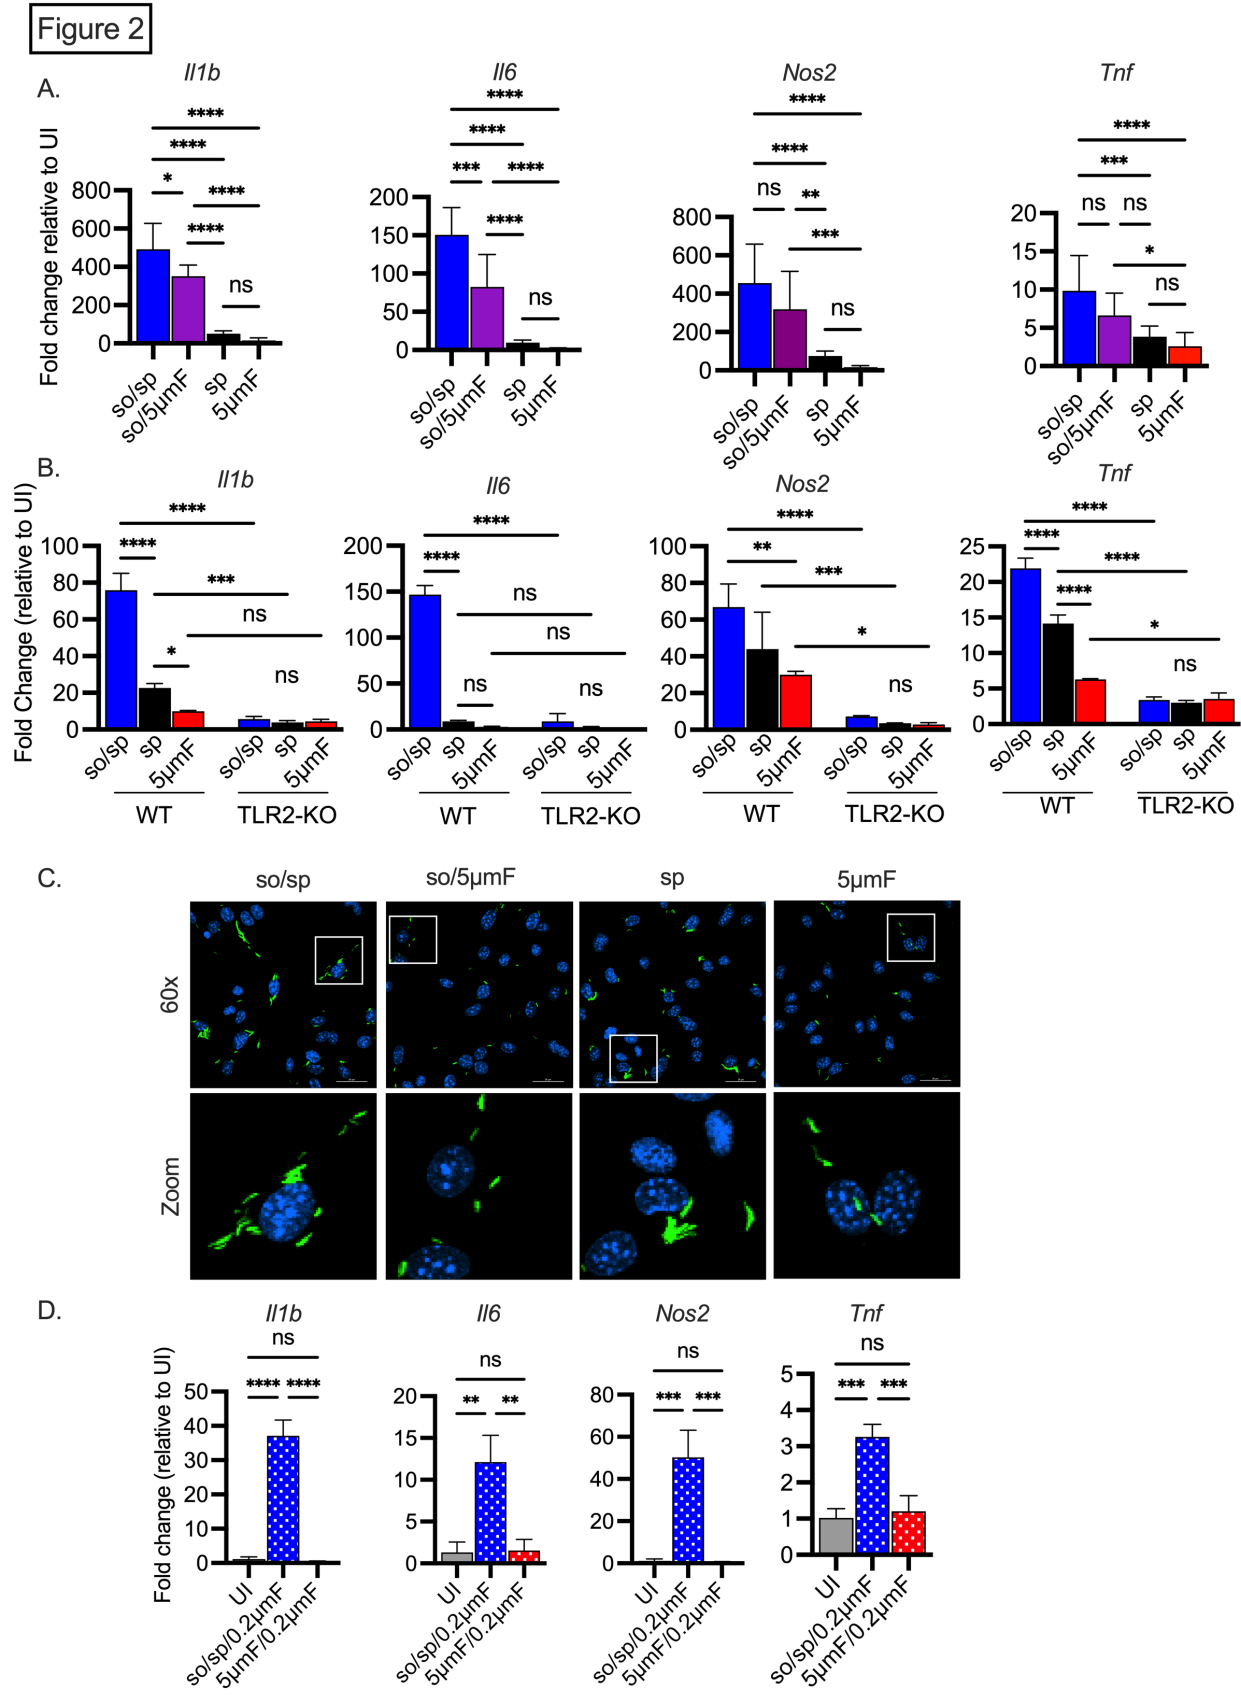

813

814

815 **Figure 2. Sonicated bacteria induce high TLR2-dependent inflammatory responses**

816 **(A)** BMDMs were uninfected or infected with different preparations of Mtb as indicated at an MOI of 10  
817 and analyzed by qPCR 6 hpi. Data are presented as fold changes in gene expression relative to  
818 uninfected BMDMs. Data are combined from 2 to 3 experiments, each with 3 biological replicates in  
819 experimental duplicate. Statistical significance was determined with one-way ANOVA using Tukey's  
820 multiple comparisons test. qPCR data are presented as fold change in gene expression relative to  
821 uninfected BMDMs. **(B)** WT or *Tlr2*<sup>-/-</sup> BMDMs were uninfected or infected with different preparations of  
822 Mtb as indicated for 6 h at an MOI of 10 and analyzed by qPCR. Data are presented as fold change in  
823 gene expression relative to uninfected BMDMs of the same mouse genotype. Data are representative  
824 of 3 experiments, each with 3 biological replicates in experimental duplicate. Statistical significance was  
825 determined with two-way ANOVA using Tukey's multiple comparisons test. **(C)** Fluorescence  
826 microscopy images of GFP-expressing Mtb infected BMDMs. Nuclei were stained with DAPI. Images  
827 are maximum-intensity projections. Boxed areas in the merged image are shown in higher magnification  
828 in the bottom panel. **(D)** BMDMs were untreated or treated with the sterile filtrate from different  
829 preparations of Mtb for 6h and analyzed by qPCR. Data are presented as fold changes in gene  
830 expression relative to untreated BMDMs. Data are representative of 3 experiments, each with 3  
831 biological replicates in experimental duplicate. Statistical significance was determined with one-way  
832 ANOVA using Tukey's multiple comparisons test. **(A-B, D)** Error bars indicate mean +/- SD. ns not  
833 significant; \*P<0.05; \*\*<0.01; \*\*\*< 0.001; \*\*\*\*< 0.0001.

834

835

836



Figure 3

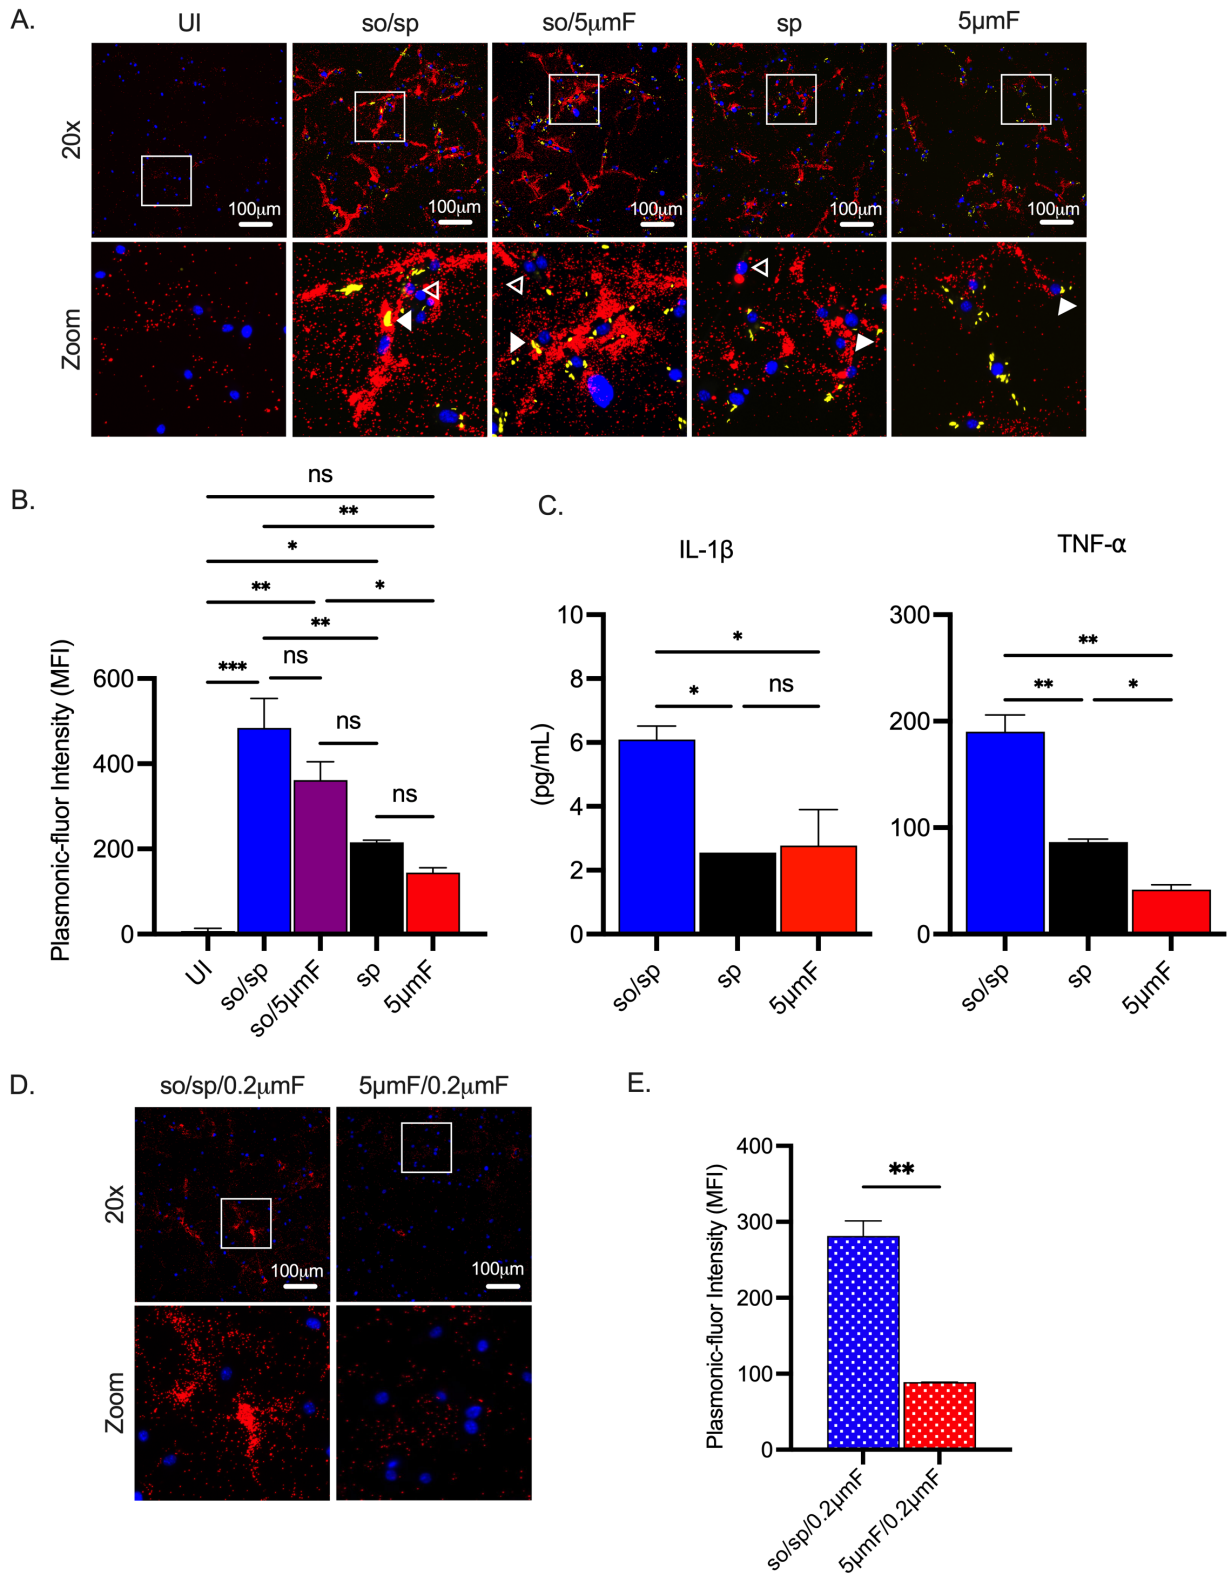

837

838

839

840 **Figure 3. Sonicated bacteria elicit elevated TNF- $\alpha$  and IL-1 $\beta$  secretion**

841 **(A)** Using the FluoroDOT assay, BMDMs were grown on a glass bottom plate that was coated with  
842 TNF- $\alpha$  capture antibody, infected at an MOI of 10 with H37Rv-GFP prepared by the indicated method,  
843 and examined by epifluorescence microscopy (20X) 6 hpi. Images show Plasmonic-fluor 650 (red), Mtb  
844 (GFP), and DAPI (blue). Boxed areas in the image are enlarged in the bottom images. Secretion from  
845 infected BMDMs or uninfected bystander cells are highlighted by open or closed white arrowheads,  
846 respectively. **(B)** Data show the quantification of the mean fluorescence intensity (MFI) of the plasmonic-  
847 fluor in the entire well from each different conditions shown in A with statistical significance determined  
848 with one-way ANOVA using Tukey's multiple comparisons test. **(C)** IL1- $\beta$  and TNF- $\alpha$  were measured  
849 24 hpi in the culture supernatant of uninfected or Mtb-infected BMDMs (MOI 10) by ELISA. Data shown  
850 are mean +/- SD from one representative experiment with 3 biological in experimental duplicate for each  
851 group. Significance was determined using one-way ANOVA with Tukeys' multiple comparisons test. **(D)**  
852 Using the FluoroDOT assay, BMDMs grown on a glass bottom plate that was coated with TNF- $\alpha$  capture  
853 antibody were exposed to the sterile filtrate of bacterial single cell suspension prepared by either so/sp  
854 or 5 $\mu$ mF and examined by epifluorescence microscopy (20X) 6 hpi. Images show Plasmonic-fluor 650  
855 (red) and DAPI (blue). Boxed areas in the image are enlarged in the bottom images. **(E)** Data show the  
856 quantification of the mean fluorescence intensity (MFI) of the plasmonic-fluor in the entire well from  
857 each condition shown in D, with statistical significance determined using an unpaired T test. (A-E) Error  
858 bars indicate mean +/- SD. ns not significant; \*P<0.05; \*\*<0.01; \*\*\*<0.001.

859

860

861

Figure 4

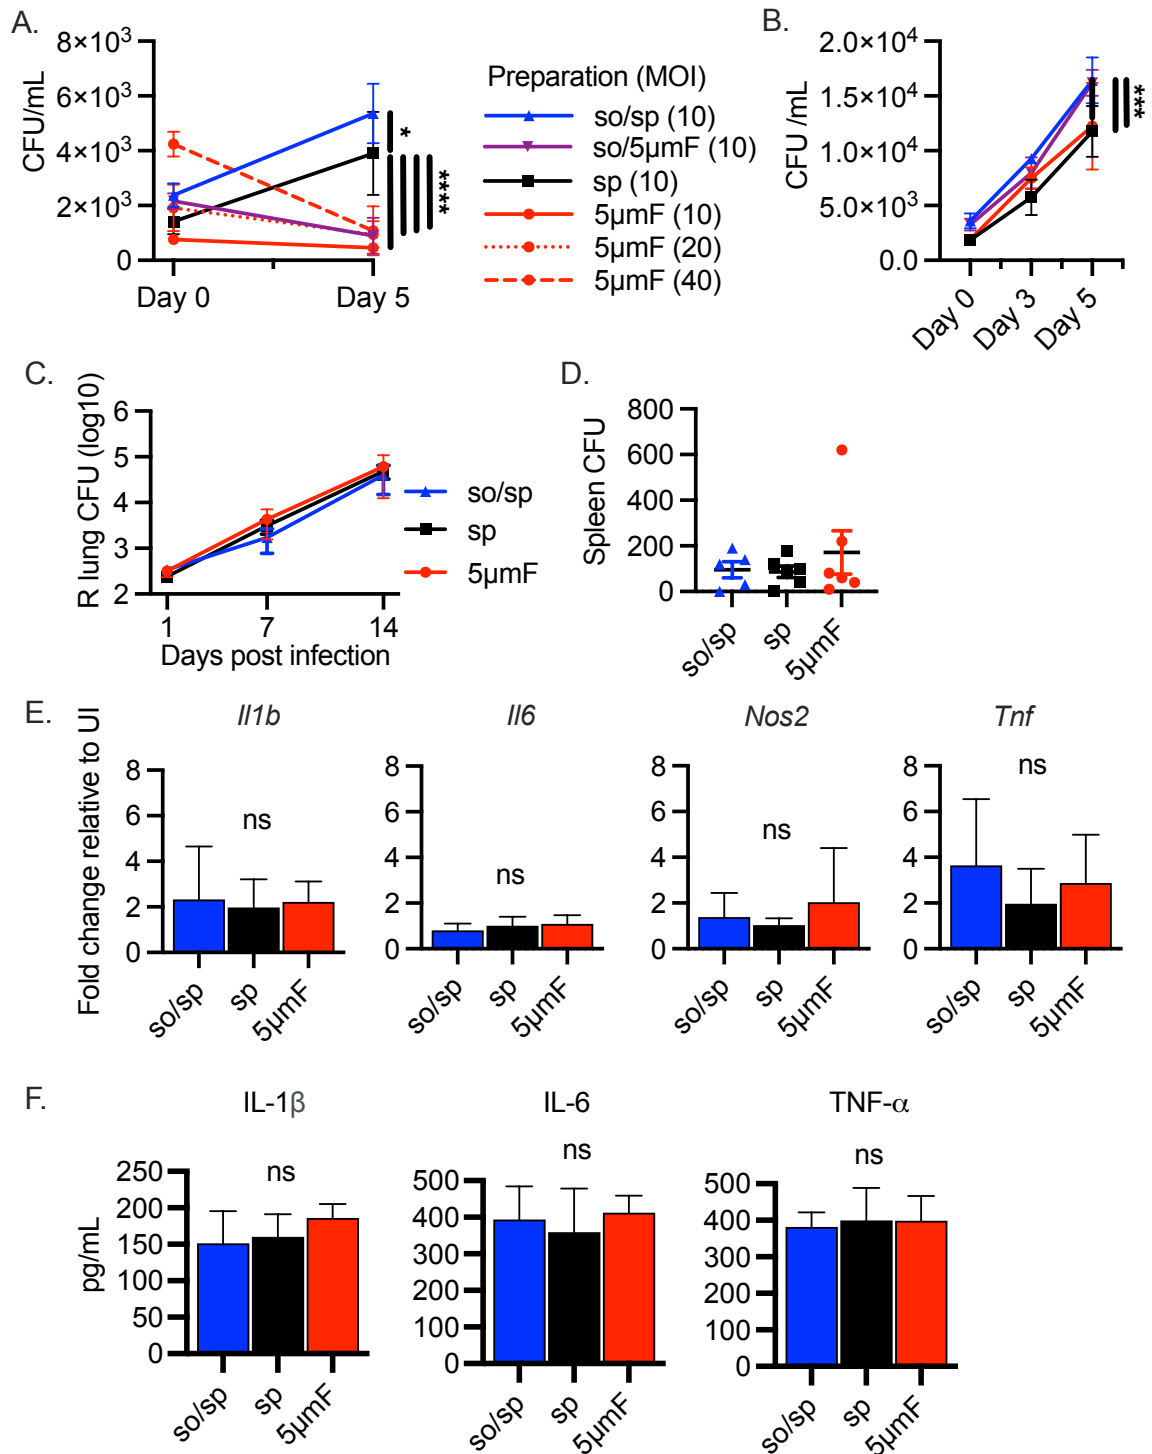

862

863 **Figure 4. Filtered Mtb are attenuated in BMDMs but not AMs or *in vivo***

864 **(A-B)** BMDMs (A) and alveolar macrophages (B) were infected with different preparations of Mtb at an

865 MOI of 10 and intracellular bacteria were enumerated by colony forming units (CFU) 4 hpi, 3 dpi, or 5

866 dpi. 5 biological replicates were used for each group in these experiments. Statistical significance  
867 between preparations was determined with two-way ANOVA using Tukey's multiple comparisons test  
868 with selected significance values presented for 5 dpi relative to spin preparation. **(C)** Right lung CFU at  
869 1, 7, and 14 days following aerosol infection of Mtb with the indicated preparation method. Statistical  
870 significance between preparations was determined with two-way ANOVA using Tukey's multiple  
871 comparisons test. **(D)** Spleen CFU 14 days following aerosol infection of Mtb with the indicated  
872 preparation method. Statistical significance between preparations was determined with one-way  
873 ANOVA using Tukey's multiple comparisons test. **(E)** qPCR of right lung homogenate from lungs of  
874 infected mice at 14 dpi. Gene expression is presented as fold change relative to uninfected mice. 6  
875 mice from each group were analyzed. Statistical significance between preparations was determined  
876 with one-way ANOVA using Tukey's multiple comparisons test. **(F)** Cytokine concentrations were  
877 determined using ELISA from homogenized left lungs of mice at 14 days following aerosol infection. 6  
878 mice from each group were analyzed. Statistical significance between preparations was determined  
879 with one-way ANOVA using Tukey's multiple comparisons test. **(A-F)** Error bars indicate mean +/- SD.  
880 ns not significant; \*P<0.05; \*\*<0.01; \*\*\*<0.001; \*\*\*\*<0.0001.  
881

Figure 5

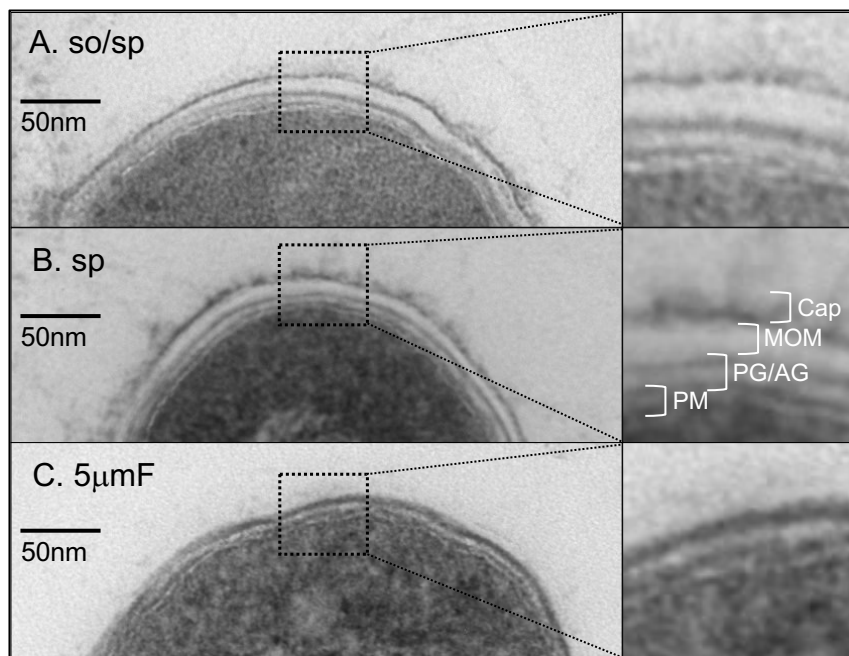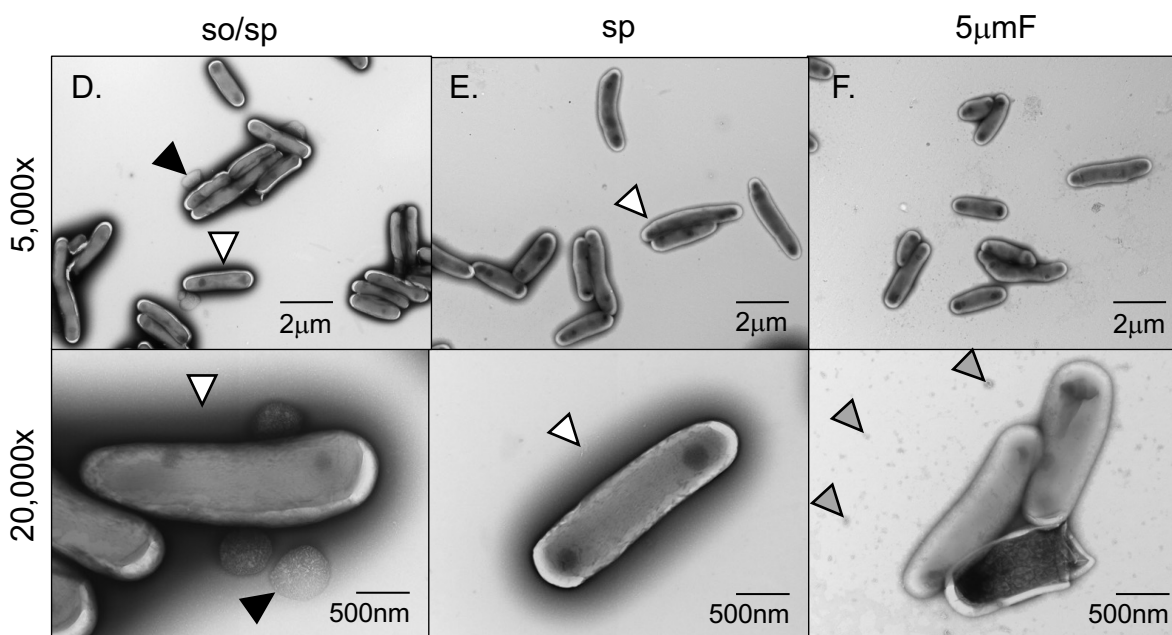

882

883

884

**Figure 5. Sonication and filtering affect the bacterial cell wall.**

885

**(A-C)** TEM of ultrathin cross-sections of Mtb at 50,000x magnification (left) beside enlarged cross-

886

section of the envelope (right). The plasma membrane (PM), peptidoglycan/arabinogalactan layer

887

(PG/AM), mycobacterial outer membrane (MOM), and capsular layer (Cap) are indicated. **(D-F)** Mtb

888

were absorbed on freshly glow discharged formvar/carbon-coated copper grids followed by negative

889 staining with 1% aqueous uranyl acetate. Representative images are 5,000x (above) and 20,000x  
890 (below). So/sp-prepared Mtb had round protuberances that were on or near their envelopes indicated  
891 by black arrows. Electron-dense outer halos seen surrounding so/sp- and sp-prepared bacteria are  
892 indicated with white arrows. Debris seen in the extracellular space of 5 $\mu$ mF-prepared Mtb is indicated  
893 with gray arrows.  
894  
895



896

Figure 6

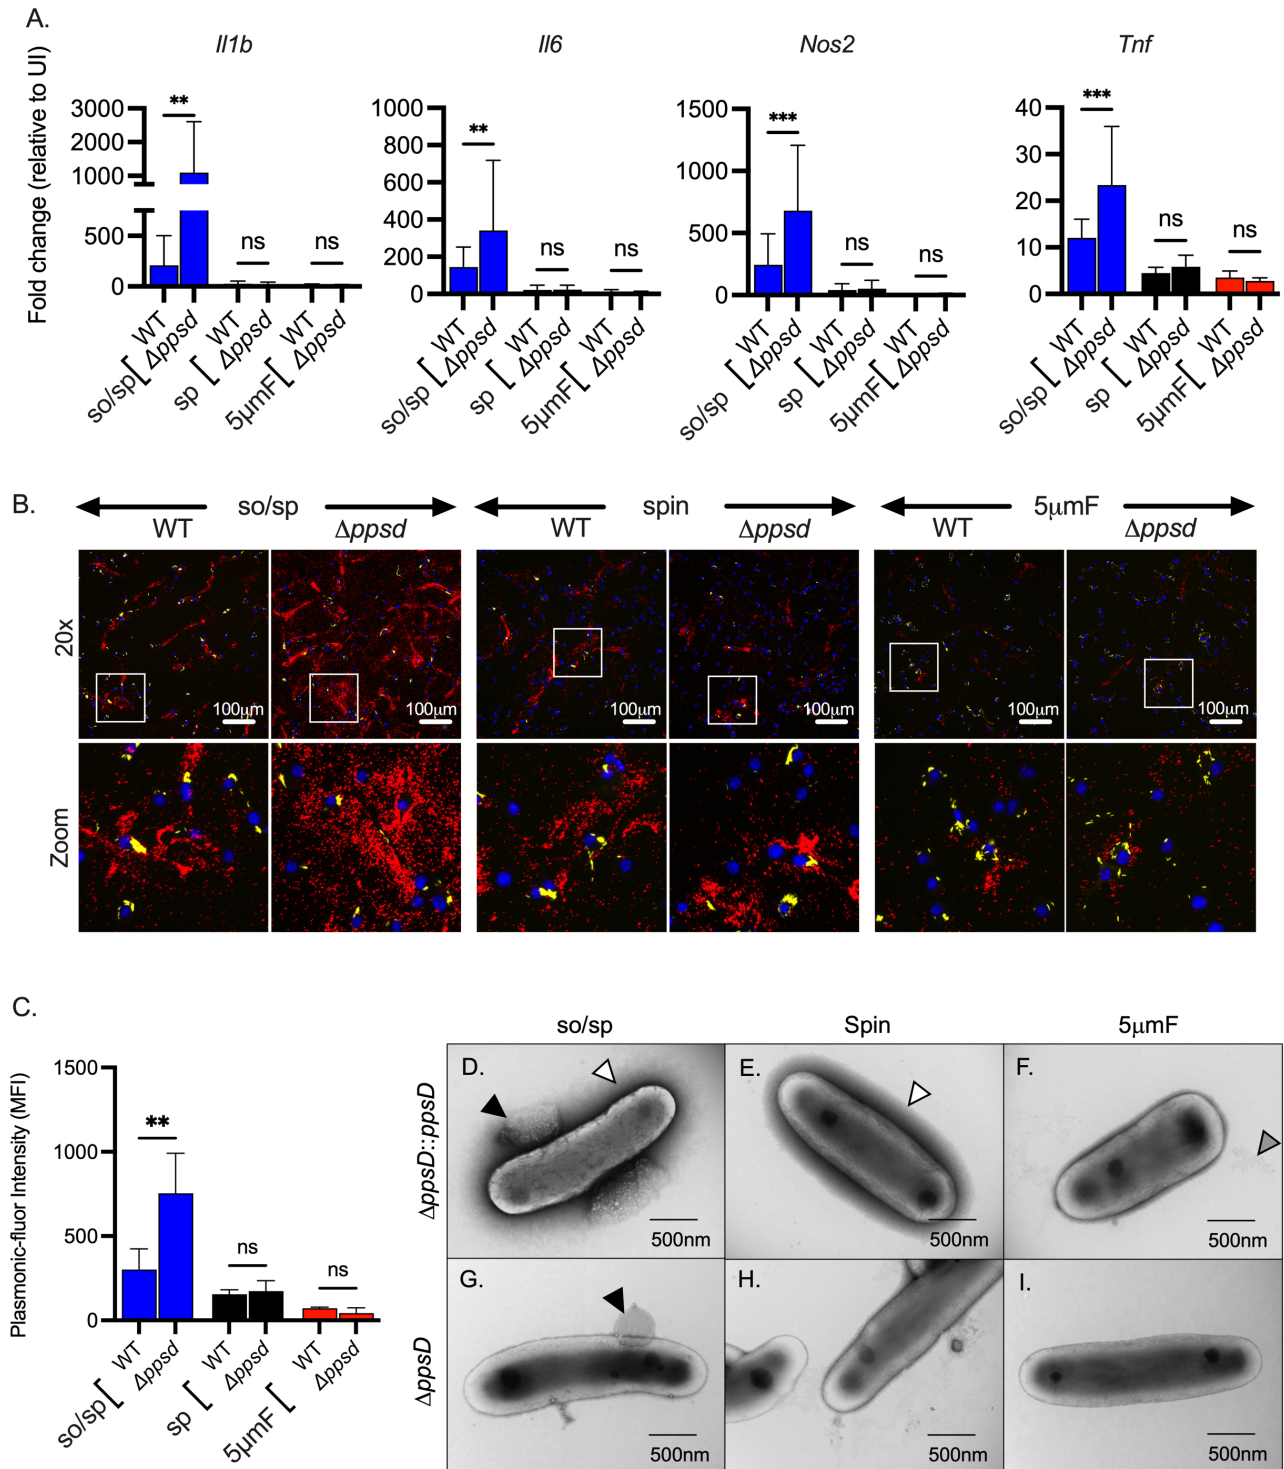

897

898

899



900 **Figure 6. The role of PDIM in inflammatory responses depends upon preparation method**

901 **(A)** BMDMs were uninfected or infected with indicated strains of Mtb at an MOI of 10, and gene  
902 expression was analyzed by qPCR at 6 hpi. Data are presented as fold change in gene expression  
903 relative to uninfected BMDMs of the same mouse genotype. Data are representative of 3 experiments,  
904 each with 3 biological replicates performed in experimental duplicate. Statistical significance was  
905 determined with two-way ANOVA using Tukey's multiple comparisons test. Data are combined from 2  
906 to 3 experiments, each with 3 biological replicates performed in experimental duplicate. **(B)** Using the  
907 FluoroDOT assay, BMDMs were grown on a glass bottom plate that was coated with TNF- $\alpha$  capture  
908 antibody, infected at an MOI of 10 with H37Rv-GFP or  $\Delta ppsD$ -GFP prepared by the indicated method,  
909 and examined by epifluorescence microscopy (20X) 6 hpi. Images show Plasmonic-fluor 650 (red), Mtb  
910 (GFP), and DAPI (blue). Boxed areas in the image are enlarged in the bottom images. **(C)** Data show  
911 the quantification of the mean fluorescence intensity (MFI) of the plasmonic-fluor in the entire well from  
912 each conditions shown in B with statistical significance determined with two-way ANOVA using Tukey's  
913 multiple comparisons test. **(D)** Bacteria were imaged by allowing indicated Mtb strains to absorb on  
914 freshly glow discharged formvar/carbon-coated copper grids followed by negative staining with 1%  
915 aqueous uranyl acetate. Round protuberances seen on or near the envelopes of so/sp-prepared H37Rv  
916 Mtb are indicated by black arrows, the electron-dense outer halos seen surrounding so/sp- and sp-  
917 prepared H37Rv Mtb are indicated with white arrows, and the debris seen in 5 $\mu$ mF-prepared H37Rv  
918 Mtb are indicated with gray arrows. **(A, C)** Error bars indicate mean +/- SD. ns not significant; \*\*P<0.01;  
919 \*\*\*<0.001.

920

921

922

923

924 **Supplementary Files**

925

926

927 **Supplemental Table 1. RNA-seq data**

928 This file lists the genes that were differentially expressed between uninfected macrophages,  
929 macrophages infected with Mtb prepared by sonication followed by low-speed spin (so/sp), and  
930 macrophages infected with Mtb prepared by passing through a 5µm filter (5µmF). Infectious were  
931 carried out at an MOI of 5 at 72 hpi.

932

933 **Supplemental Table 2. PCR primers used**

| Name                       | Primer                   |
|----------------------------|--------------------------|
| <i>M. musculus Gapdh</i> F | AGGTCGGTGTGAACGGATTTG    |
| <i>M. musculus Gapdh</i> R | TGTAGACCATGTAGTTGAGGTCA  |
| <i>M. musculus Il1b</i> F  | GCAACTGTTCTGAACTCAACT    |
| <i>M. musculus Il1b</i> R  | ATCTTTTGGGGTCCGTCAACT    |
| <i>M. musculus Il6</i> F   | TAGTCCTTCCTACCCCAATTTCC  |
| <i>M. musculus Il6</i> R   | TTGGTCCTTAGCCACTCCTTC    |
| <i>M. musculus Nos2</i> F  | GTTCTCAGCCCAACAATACAA GA |
| <i>M. musculus Nos2</i> R  | GTGGACGGGTCGATGTCAC      |
| <i>M. musculus Tnf</i> F   | CCCTCACACTCAGATCATCTTCT  |
| <i>M. musculus Tnf</i> R   | GCTACGACGTGGGCTACAG      |

934

935

Figure S1

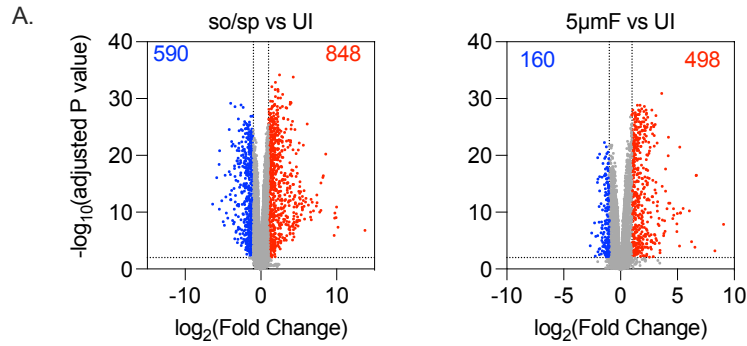

B.

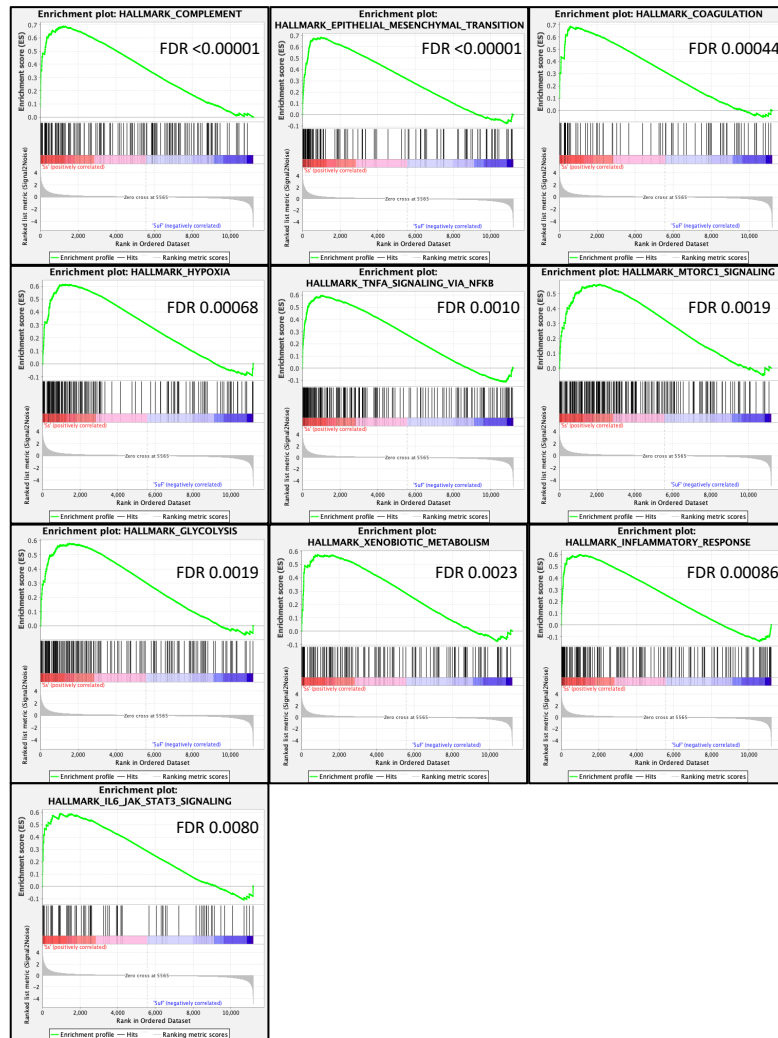

C.

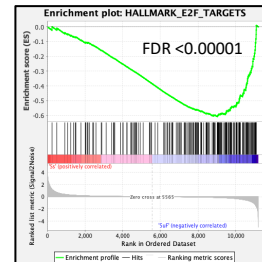

936  
937  
938  
939  
940  
941  
942  
943  
944  
945

**Supplemental Figure 1. Infection-induced changes in macrophage gene expression depend on whether Mtb are sonicated or filtered**

(A) Volcano plot shows genes differentially expressed in BMDMs infected with so/sp versus UI (left) or 5µmF Mtb versus UI (right). DEGs exhibiting an adjusted P-value of  $\leq 0.01$  and a linear fold change  $\geq 2.00$  (red) or  $\leq 2.00$  (blue) are indicated. (B-C) Gene set enrichment analysis (GSEA) leading edge graphs of hallmark gene sets that were enriched in BMDMs infected with so/sp relative to 5µmF Mtb (B) or 5µmF relative to so/sp (C).

Figure S2

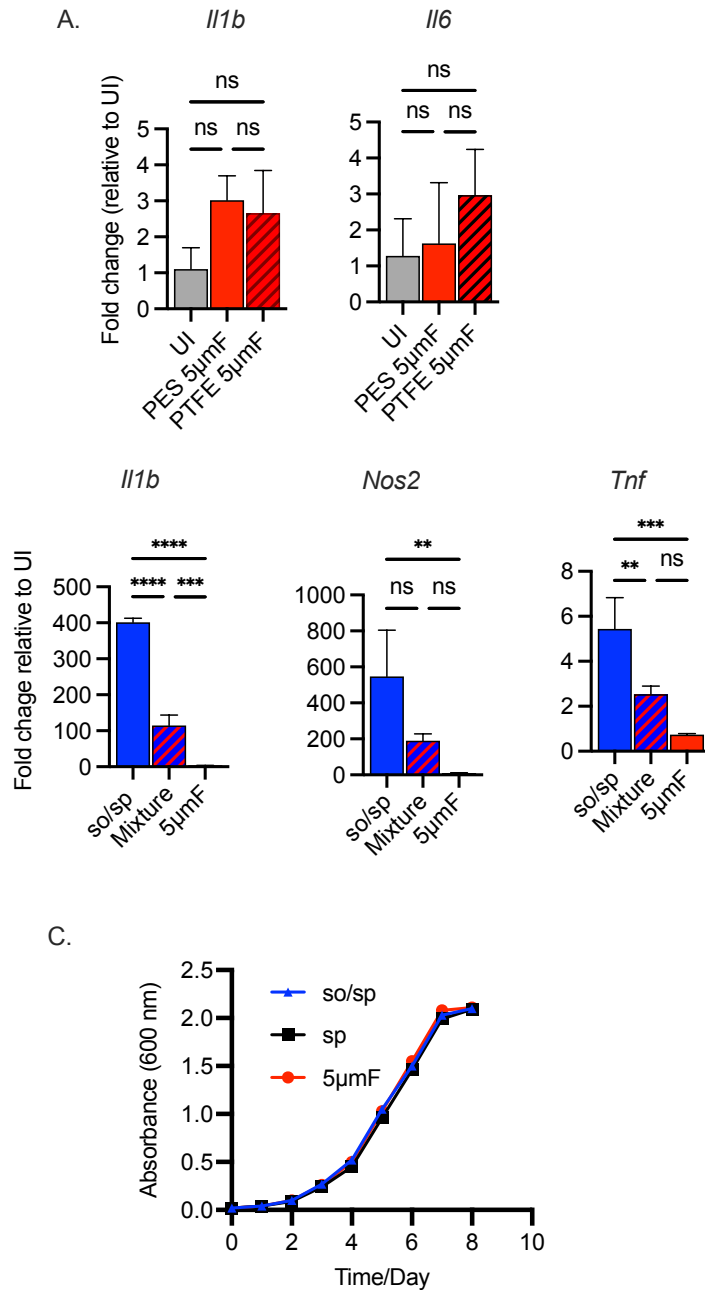

946  
947

948 **Supplemental Figure 2. Filtered Mtb are uninflamatory irrespective of filter type, do not**  
949 **strongly inhibit response from sonicated bacteria, and grow normally in vitro.**

950 **(A)** BMDMs were uninfected or infected with Mtb prepared by passing through a 5µmF made of either  
951 PES or PTFE using a MOI of 10 and analyzed by qPCR 6 hpi. Data are presented as fold changes in  
952 gene expression relative to uninfected BMDMs. **(B)** BMDMs were uninfected or infected for 6h at a MOI  
953 of 10 with bacteria prepared by the so/sp or 5µmF-preparation or a mixture (1:1) of the two samples.  
954 Data are presented as fold change in gene expression relative to uninfected BMDMs. **(A-B)** Each group  
955 used 3 biological replicates performed in experimental duplicate. Statistical significance was determined  
956 with one-way ANOVA using Tukey's multiple comparisons test. qPCR data are presented as fold  
957 change in gene expression relative to uninfected BMDMs. Error bars indicate mean +/- SD. ns not  
958 significant; \*\*P<0.01; \*\*\*<0.001; \*\*\*\*<0.0001. **(C)** Growth curve of different bacterial preparation in liquid  
959 media (7H9 media supplemented with 10% Middlebrook OADC, 0.05% Tyloxapol, and 0.2% glycerol).

Figure S3

A.

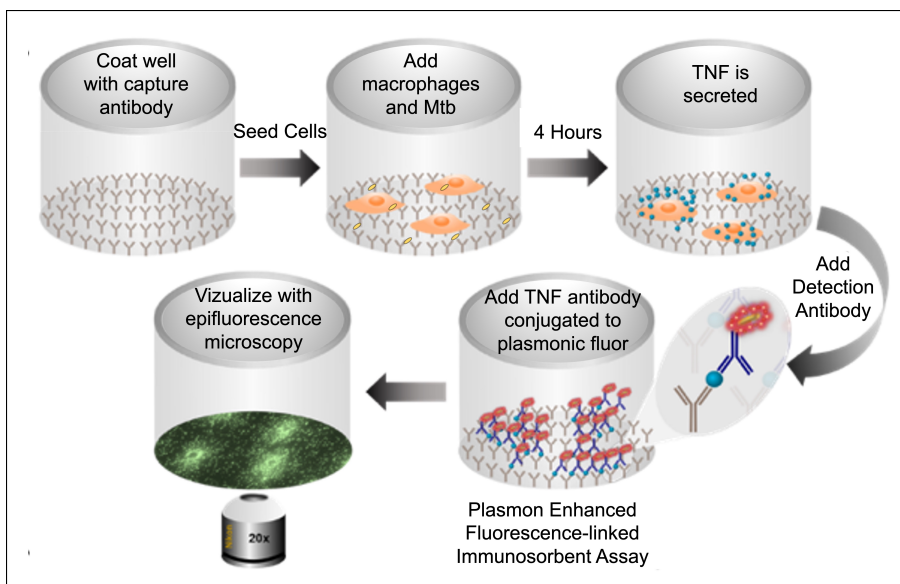

B.

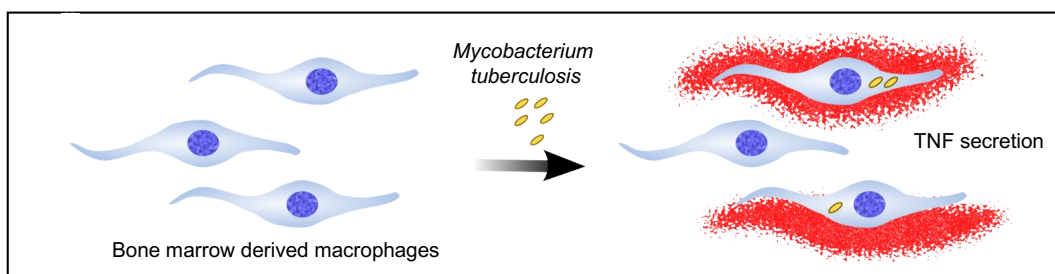

C.

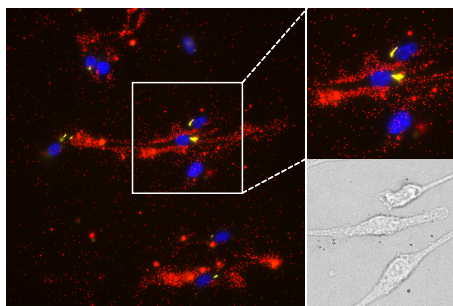

960

961

962

**Supplemental Figure 3. Schematic representation of the FluoroDOT assay**  
(A) 96-well glass bottom plates are coated with TNF- $\alpha$  capture antibody, followed by the addition of BMDMs. The macrophages are then infected with Mtb. TNF- $\alpha$  that is secreted by the BMDMs can be bound by the capture antibody. Samples are fixed and then the detection antibody, which is conjugated to plasmon-fluor 650, is added and the plate is visualized using epifluorescence microscopy. (B) Illustration indicating how the assay can reveal TNF- $\alpha$  secretion from Mtb-infected or bystander macrophages. (C) Representative fluorescent image with zoomed region and corresponding brightfield image. The three cells in the images demonstrate examples of an infected macrophage secreting substantial TNF- $\alpha$  (middle), an infected cell with little TNF- $\alpha$  secretion (top), and an uninfected within minimal TNF- $\alpha$  secretion (bottom). Macrophages were stained with DAPI (blue); TNF- $\alpha$  is red.

972

Figure S4

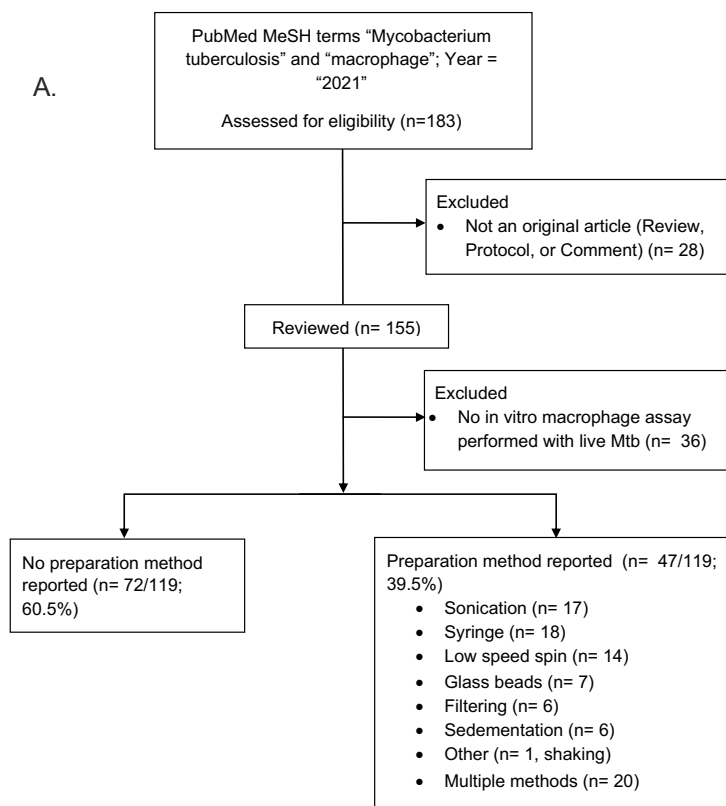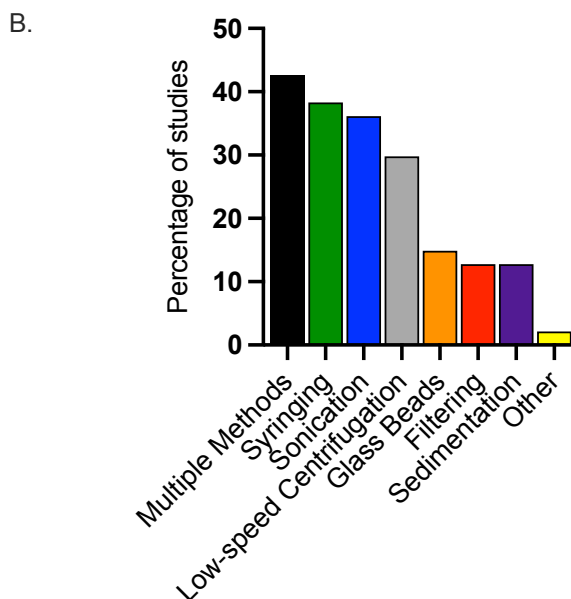

973  
974  
975  
976  
977  
978

**Supplemental Figure 4. Literature review of methods used to generate single cell Mtb suspensions**

(A) Approach used to analyze the literature to define the frequency with which distinct single cell preparation methods are used and how often they are reported. (B) Graph demonstrates the distribution of methods reported. Since some studies used multiple methods, the total does not equal 100.
