# Supplementary material for: Single cell preparations of Mycobacterium tuberculosis damage the mycobacterial envelope and disrupt macrophage interactions
Source: bioRxiv preprint, doi:10.1101/2022.06.16.496372, version 2 (2022-12-08)
Supplement: Supplemental Table 1 [file 496372_file02.xlsx]

## Sheet: so sp vs 5µmF
Differentially expressed genes (adj P val ≥0.01 and linear FC ≥2 in WT BMDMs infected with H37Rv for 72 hours post infection at MOI 5; Differentially expressed genes presented in so/sp- relative to 5µmF-infected BMDMs.
Feature_ID	entrezgene	external_gene_name	gene_biotype	description	linearFC	logFC	CI.L	CI.R	P.Value	adj.P.Val
ENSMUSG00000058624	14544	Gda	protein_coding	guanine deaminase [Source:MGI Symbol;Acc:MGI:95678]	6.48004	2.696	2.83385	2.55815	8.36195e-32	5.78145e-28
ENSMUSG00000026728	22352	Vim	protein_coding	vimentin [Source:MGI Symbol;Acc:MGI:98932]	2.41384	1.27133	1.33589	1.20676	6.54621e-32	5.78145e-28
ENSMUSG00000001128	18636	Cfp	protein_coding	complement factor properdin [Source:MGI Symbol;Acc:MGI:97545]	2.50113	1.32258	1.39339	1.25177	4.38311e-31	2.02032e-27
ENSMUSG00000024053	246707	Emilin2	protein_coding	elastin microfibril interfacer 2 [Source:MGI Symbol;Acc:MGI:2389136]	4.17331	2.06119	2.18402	1.93837	2.02761e-29	4.0054e-26
ENSMUSG00000030786	16409	Itgam	protein_coding	integrin alpha M [Source:MGI Symbol;Acc:MGI:96607]	2.515	1.33056	1.40958	1.25154	1.79537e-29	4.0054e-26
ENSMUSG00000028108	13601	Ecm1	protein_coding	extracellular matrix protein 1 [Source:MGI Symbol;Acc:MGI:103060]	2.08926	1.06299	1.12675	0.999239	2.55685e-29	4.41951e-26
ENSMUSG00000035493	21810	Tgfbi	protein_coding	transforming growth factor, beta induced [Source:MGI Symbol;Acc:MGI:99959]	2.49128	1.31689	1.39814	1.23563	7.02304e-29	1.07905e-25
ENSMUSG00000045312	218454	Lhfpl2	protein_coding	lipoma HMGIC fusion partner-like 2 [Source:MGI Symbol;Acc:MGI:2145236]	2.51963	1.33321	1.41581	1.25061	8.13046e-29	1.12428e-25
ENSMUSG00000057191	382062	AB124611	protein_coding	cDNA sequence AB124611 [Source:MGI Symbol;Acc:MGI:3043001]	2.07044	1.04994	1.11604	0.983841	1.43743e-28	1.80698e-25
ENSMUSG00000048234	67702	Rnf149	protein_coding	ring finger protein 149 [Source:MGI Symbol;Acc:MGI:2677438]	3.42409	1.77572	1.88797	1.66347	1.66666e-28	1.92054e-25
ENSMUSG00000021477	13039	Ctsl	protein_coding	cathepsin L [Source:MGI Symbol;Acc:MGI:88564]	2.8026	1.48676	1.5817	1.39183	2.37889e-28	2.53041e-25
ENSMUSG00000037820	21817	Tgm2	protein_coding	transglutaminase 2, C polypeptide [Source:MGI Symbol;Acc:MGI:98731]	3.79828	1.92535	2.06082	1.78987	7.43503e-27	6.85411e-24
ENSMUSG00000046245	231805	Pilra	protein_coding	paired immunoglobin-like type 2 receptor alpha [Source:MGI Symbol;Acc:MGI:2450529]	5.82492	2.54224	2.72753	2.35695	2.56957e-26	2.17761e-23
ENSMUSG00000076441	11898	Ass1	protein_coding	argininosuccinate synthetase 1 [Source:MGI Symbol;Acc:MGI:88090]	5.65398	2.49927	2.68164	2.3169	2.67713e-26	2.17761e-23
ENSMUSG00000034641	217305	Cd300ld	protein_coding	CD300 molecule like family member d [Source:MGI Symbol;Acc:MGI:2442358]	2.06034	1.04288	1.12103	0.964726	6.83058e-26	4.72266e-23
ENSMUSG00000000204	20558	Slfn4	protein_coding	schlafen 4 [Source:MGI Symbol;Acc:MGI:1329010]	4.53542	2.18123	2.34735	2.01512	1.20219e-25	7.00759e-23
ENSMUSG00000055172	50909	C1ra	protein_coding	complement component 1, r subcomponent A [Source:MGI Symbol;Acc:MGI:1355313]	3.47282	1.79611	1.93294	1.65928	1.21624e-25	7.00759e-23
ENSMUSG00000018927	20305	Ccl6	protein_coding	chemokine (C-C motif) ligand 6 [Source:MGI Symbol;Acc:MGI:98263]	3.35318	1.74553	1.87871	1.61235	1.28289e-25	7.09595e-23
ENSMUSG00000026478	226519	Lamc1	protein_coding	laminin, gamma 1 [Source:MGI Symbol;Acc:MGI:99914]	2.17342	1.11997	1.20566	1.03427	1.41574e-25	7.52955e-23
ENSMUSG00000040026	20210	Saa3	protein_coding	serum amyloid A 3 [Source:MGI Symbol;Acc:MGI:98223]	43.6707	5.4486	5.87017	5.02702	2.09352e-25	1.07219e-22
ENSMUSG00000035778	14594	Ggta1	protein_coding	glycoprotein galactosyltransferase alpha 1, 3 [Source:MGI Symbol;Acc:MGI:95704]	2.28174	1.19014	1.28292	1.09736	2.72526e-25	1.34589e-22
ENSMUSG00000071713	12983	Csf2rb	protein_coding	colony stimulating factor 2 receptor, beta, low-affinity (granulocyte-macrophage) [Source:MGI Symbol;Acc:MGI:1339759]	2.10626	1.07469	1.15929	0.990081	3.83623e-25	1.71121e-22
ENSMUSG00000022180	50934	Slc7a8	protein_coding	solute carrier family 7 (cationic amino acid transporter, y+ system), member 8 [Source:MGI Symbol;Acc:MGI:1355323]	2.14128	1.09847	1.18518	1.01177	4.20203e-25	1.8158e-22
ENSMUSG00000074677	100038947	Sirpb1c	protein_coding	signal-regulatory protein beta 1C [Source:MGI Symbol;Acc:MGI:3807521]	9.33639	3.22287	3.47832	2.96741	4.86708e-25	2.03945e-22
ENSMUSG00000031438	66889	Rnf128	protein_coding	ring finger protein 128 [Source:MGI Symbol;Acc:MGI:1914139]	2.66432	1.41376	1.52644	1.30109	5.89927e-25	2.27186e-22
ENSMUSG00000031709	71310	Tbc1d9	protein_coding	TBC1 domain family, member 9 [Source:MGI Symbol;Acc:MGI:1918560]	2.04327	1.03088	1.11305	0.948713	5.91459e-25	2.27186e-22
ENSMUSG00000040152	21825	Thbs1	protein_coding	thrombospondin 1 [Source:MGI Symbol;Acc:MGI:98737]	14.6458	3.87241	4.1816	3.56323	6.27589e-25	2.28376e-22
ENSMUSG00000023913	27226	Pla2g7	protein_coding	phospholipase A2, group VII (platelet-activating factor acetylhydrolase, plasma) [Source:MGI Symbol;Acc:MGI:1351327]	6.44914	2.68911	2.9037	2.47451	6.16069e-25	2.28376e-22
ENSMUSG00000044864	99696	Ankrd50	protein_coding	ankyrin repeat domain 50 [Source:MGI Symbol;Acc:MGI:2139777]	2.50415	1.32432	1.43202	1.21662	1.19053e-24	4.01527e-22
ENSMUSG00000011752	18648	Pgam1	protein_coding	phosphoglycerate mutase 1 [Source:MGI Symbol;Acc:MGI:97552]	2.68626	1.4256	1.54254	1.30866	1.60638e-24	4.93622e-22
ENSMUSG00000024679	68774	Ms4a6d	protein_coding	membrane-spanning 4-domains, subfamily A, member 6D [Source:MGI Symbol;Acc:MGI:1916024]	2.33886	1.22581	1.32628	1.12533	1.56481e-24	4.93622e-22
ENSMUSG00000025044	20288	Msr1	protein_coding	macrophage scavenger receptor 1 [Source:MGI Symbol;Acc:MGI:98257]	2.44251	1.28836	1.39661	1.18012	3.6994e-24	1.08841e-21
ENSMUSG00000021728	13723	Emb	protein_coding	embigin [Source:MGI Symbol;Acc:MGI:95321]	3.18811	1.6727	1.81433	1.53107	4.83125e-24	1.35114e-21
ENSMUSG00000045092	13609	S1pr1	protein_coding	sphingosine-1-phosphate receptor 1 [Source:MGI Symbol;Acc:MGI:1096355]	2.15759	1.10942	1.20338	1.01545	4.88553e-24	1.35114e-21
ENSMUSG00000042700	217692	Sipa1l1	protein_coding	signal-induced proliferation-associated 1 like 1 [Source:MGI Symbol;Acc:MGI:2443679]	3.12523	1.64396	1.7855	1.50243	8.61051e-24	2.23926e-21
ENSMUSG00000032261	212531	Sh3bgrl2	protein_coding	SH3 domain binding glutamic acid-rich protein like 2 [Source:MGI Symbol;Acc:MGI:1915350]	2.0494	1.0352	1.12437	0.946038	8.74457e-24	2.23926e-21
ENSMUSG00000029135	14284	Fosl2	protein_coding	fos-like antigen 2 [Source:MGI Symbol;Acc:MGI:102858]	5.37939	2.42744	2.63863	2.21625	1.23683e-23	3.00052e-21
ENSMUSG00000017132	19157	Cyth1	protein_coding	cytohesin 1 [Source:MGI Symbol;Acc:MGI:1334257]	2.05036	1.03588	1.12663	0.94513	1.57108e-23	3.62081e-21
ENSMUSG00000033192	270084	Lpcat2	protein_coding	lysophosphatidylcholine acyltransferase 2 [Source:MGI Symbol;Acc:MGI:3606214]	2.10321	1.07259	1.16675	0.978429	1.68889e-23	3.82853e-21
ENSMUSG00000025355	58223	Mmp19	protein_coding	matrix metallopeptidase 19 [Source:MGI Symbol;Acc:MGI:1927899]	2.60811	1.383	1.50541	1.2606	2.23529e-23	4.90628e-21
ENSMUSG00000000957	17387	Mmp14	protein_coding	matrix metallopeptidase 14 (membrane-inserted) [Source:MGI Symbol;Acc:MGI:101900]	6.29498	2.6542	2.89026	2.41815	2.64172e-23	5.61995e-21
ENSMUSG00000075705	27361	Msrb1	protein_coding	methionine sulfoxide reductase B1 [Source:MGI Symbol;Acc:MGI:1351642]	2.25434	1.17271	1.27768	1.06774	3.30018e-23	6.71102e-21
ENSMUSG00000021109	15251	Hif1a	protein_coding	hypoxia inducible factor 1, alpha subunit [Source:MGI Symbol;Acc:MGI:106918]	4.08028	2.02867	2.21088	1.84646	3.71127e-23	7.43759e-21
ENSMUSG00000018796	14081	Acsl1	protein_coding	acyl-CoA synthetase long-chain family member 1 [Source:MGI Symbol;Acc:MGI:102797]	5.18928	2.37553	2.59173	2.15934	5.83351e-23	1.10501e-20
ENSMUSG00000023951	22339	Vegfa	protein_coding	vascular endothelial growth factor A [Source:MGI Symbol;Acc:MGI:103178]	2.79595	1.48334	1.61956	1.34712	7.96193e-23	1.48781e-20
ENSMUSG00000025203	20250	Scd2	protein_coding	stearoyl-Coenzyme A desaturase 2 [Source:MGI Symbol;Acc:MGI:98240]	4.82202	2.26964	2.47836	2.06092	8.34643e-23	1.51861e-20
ENSMUSG00000066684	170741	Pilrb1	protein_coding	paired immunoglobin-like type 2 receptor beta 1 [Source:MGI Symbol;Acc:MGI:2450532]	3.79938	1.92576	2.10336	1.74818	9.17738e-23	1.62698e-20
ENSMUSG00000054676	72244	1600014C10Rik	protein_coding	RIKEN cDNA 1600014C10 gene [Source:MGI Symbol;Acc:MGI:1919494]	2.02596	1.01861	1.11329	0.923923	1.20553e-22	2.08376e-20
ENSMUSG00000001281	16421	Itgb7	protein_coding	integrin beta 7 [Source:MGI Symbol;Acc:MGI:96616]	2.36495	1.24181	1.35756	1.12606	1.32443e-22	2.20653e-20
ENSMUSG00000038539	107503	Atf5	protein_coding	activating transcription factor 5 [Source:MGI Symbol;Acc:MGI:2141857]	2.24662	1.16776	1.27693	1.05859	1.4667e-22	2.38607e-20
ENSMUSG00000034248	67712	Slc25a37	protein_coding	solute carrier family 25, member 37 [Source:MGI Symbol;Acc:MGI:1914962]	2.28476	1.19204	1.30455	1.07953	2.03232e-22	3.12255e-20
ENSMUSG00000005413	15368	Hmox1	protein_coding	heme oxygenase 1 [Source:MGI Symbol;Acc:MGI:96163]	2.6611	1.41202	1.54699	1.27705	3.12876e-22	4.6521e-20
ENSMUSG00000066682	545812	Pilrb2	protein_coding	paired immunoglobin-like type 2 receptor beta 2 [Source:MGI Symbol;Acc:MGI:2450535]	2.98211	1.57634	1.72818	1.42449	4.07491e-22	5.87738e-20
ENSMUSG00000063229	16828	Ldha	protein_coding	lactate dehydrogenase A [Source:MGI Symbol;Acc:MGI:96759]	2.65816	1.41043	1.5466	1.27426	4.3974e-22	6.26879e-20
ENSMUSG00000023456	21991	Tpi1	protein_coding	triosephosphate isomerase 1 [Source:MGI Symbol;Acc:MGI:98797]	2.80015	1.48551	1.62902	1.34199	4.50348e-22	6.33342e-20
ENSMUSG00000057666	100042025	Gapdh	protein_coding	glyceraldehyde-3-phosphate dehydrogenase [Source:MGI Symbol;Acc:MGI:95640]	2.20248	1.13913	1.24921	1.02904	4.55238e-22	6.33342e-20
ENSMUSG00000022126	16365	Acod1	protein_coding	aconitate decarboxylase 1 [Source:MGI Symbol;Acc:MGI:103206]	3.73633	1.90162	2.08683	1.71642	5.92094e-22	7.81919e-20
ENSMUSG00000021069	110095	Pygl	protein_coding	liver glycogen phosphorylase [Source:MGI Symbol;Acc:MGI:97829]	2.57612	1.3652	1.49817	1.23223	5.93734e-22	7.81919e-20
ENSMUSG00000032193	16835	Ldlr	protein_coding	low density lipoprotein receptor [Source:MGI Symbol;Acc:MGI:96765]	2.14839	1.10326	1.21156	0.994953	7.75041e-22	9.83235e-20
ENSMUSG00000025161	80879	Slc16a3	protein_coding	solute carrier family 16 (monocarboxylic acid transporters), member 3 [Source:MGI Symbol;Acc:MGI:1933438]	5.31988	2.4114	2.65177	2.17102	1.30364e-21	1.55403e-19
ENSMUSG00000063524	13806	Eno1	protein_coding	enolase 1, alpha non-neuron [Source:MGI Symbol;Acc:MGI:95393]	2.76566	1.46762	1.61535	1.3199	1.81003e-21	2.1004e-19
ENSMUSG00000047592	381680	Nxpe5	protein_coding	neurexophilin and PC-esterase domain family, member 5 [Source:MGI Symbol;Acc:MGI:3584036]	3.28935	1.7178	1.89192	1.54369	2.29315e-21	2.59916e-19
ENSMUSG00000043017	19222	Ptgir	protein_coding	prostaglandin I receptor (IP) [Source:MGI Symbol;Acc:MGI:99535]	2.69839	1.4321	1.57806	1.28614	2.76332e-21	3.03263e-19
ENSMUSG00000045362	244237	Tnfrsf26	protein_coding	tumor necrosis factor receptor superfamily, member 26 [Source:MGI Symbol;Acc:MGI:2651928]	2.26682	1.18067	1.30164	1.0597	3.29633e-21	3.5023e-19
ENSMUSG00000032294	18746	Pkm	protein_coding	pyruvate kinase, muscle [Source:MGI Symbol;Acc:MGI:97591]	2.16884	1.11692	1.23136	1.00248	3.30041e-21	3.5023e-19
ENSMUSG00000054843	226255	Atrnl1	protein_coding	attractin like 1 [Source:MGI Symbol;Acc:MGI:2147749]	2.13757	1.09597	1.20822	0.983725	3.2572e-21	3.5023e-19
ENSMUSG00000056749	18030	Nfil3	protein_coding	nuclear factor, interleukin 3, regulated [Source:MGI Symbol;Acc:MGI:109495]	3.21234	1.68362	1.85659	1.51065	3.61591e-21	3.78794e-19
ENSMUSG00000020277	18641	Pfkl	protein_coding	phosphofructokinase, liver, B-type [Source:MGI Symbol;Acc:MGI:97547]	3.16065	1.66022	1.83145	1.48899	4.12119e-21	4.2848e-19
ENSMUSG00000020227	73914	Irak3	protein_coding	interleukin-1 receptor-associated kinase 3 [Source:MGI Symbol;Acc:MGI:1921164]	3.88556	1.95812	2.1605	1.75574	4.42661e-21	4.50082e-19
ENSMUSG00000004609	12489	Cd33	protein_coding	CD33 antigen [Source:MGI Symbol;Acc:MGI:99440]	3.15736	1.65872	1.83088	1.48656	5.10256e-21	5.15023e-19
ENSMUSG00000057315	231532	Arhgap24	protein_coding	Rho GTPase activating protein 24 [Source:MGI Symbol;Acc:MGI:1922647]	2.57418	1.36411	1.50575	1.22248	5.16077e-21	5.17124e-19
ENSMUSG00000073557	329251	Ppp1r12b	protein_coding	protein phosphatase 1, regulatory subunit 12B [Source:MGI Symbol;Acc:MGI:1916417]	5.26209	2.39564	2.64551	2.14576	6.02381e-21	5.9076e-19
ENSMUSG00000009185	20307	Ccl8	protein_coding	chemokine (C-C motif) ligand 8 [Source:MGI Symbol;Acc:MGI:101878]	3.09143	1.62827	1.79911	1.45744	7.33512e-21	7.04375e-19
ENSMUSG00000030144	17474	Clec4d	protein_coding	C-type lectin domain family 4, member d [Source:MGI Symbol;Acc:MGI:1298389]	2.35064	1.23306	1.36259	1.10352	7.65797e-21	7.30306e-19
ENSMUSG00000038679	83925	Trps1	protein_coding	transcriptional repressor GATA binding 1 [Source:MGI Symbol;Acc:MGI:1927616]	2.01436	1.01032	1.11685	0.903791	8.66932e-21	8.15506e-19
ENSMUSG00000036427	14751	Gpi1	protein_coding	glucose phosphate isomerase 1 [Source:MGI Symbol;Acc:MGI:95797]	2.02731	1.01956	1.12729	0.911832	9.30627e-21	8.69507e-19
ENSMUSG00000021831	50527	Ero1l	protein_coding	ERO1-like (S. cerevisiae) [Source:MGI Symbol;Acc:MGI:1354385]	4.20318	2.07148	2.29151	1.85145	1.1091e-20	1.01567e-18
ENSMUSG00000037759	19217	Ptger2	protein_coding	prostaglandin E receptor 2 (subtype EP2) [Source:MGI Symbol;Acc:MGI:97794]	4.53612	2.18146	2.41357	1.94935	1.17549e-20	1.06939e-18
ENSMUSG00000053113	12702	Socs3	protein_coding	suppressor of cytokine signaling 3 [Source:MGI Symbol;Acc:MGI:1201791]	2.93562	1.55367	1.71965	1.38768	1.34534e-20	1.20801e-18
ENSMUSG00000026315	20725	Serpinb8	protein_coding	serine (or cysteine) peptidase inhibitor, clade B, member 8 [Source:MGI Symbol;Acc:MGI:894657]	3.31402	1.72858	1.91459	1.54258	1.7138e-20	1.47195e-18
ENSMUSG00000006818	20656	Sod2	protein_coding	superoxide dismutase 2, mitochondrial [Source:MGI Symbol;Acc:MGI:98352]	3.64503	1.86593	2.06691	1.66496	1.76815e-20	1.50926e-18
ENSMUSG00000023349	56620	Clec4n	protein_coding	C-type lectin domain family 4, member n [Source:MGI Symbol;Acc:MGI:1861231]	2.98828	1.57932	1.74978	1.40885	1.89844e-20	1.59382e-18
ENSMUSG00000056220	18783	Pla2g4a	protein_coding	phospholipase A2, group IVA (cytosolic, calcium-dependent) [Source:MGI Symbol;Acc:MGI:1195256]	2.45779	1.29736	1.4374	1.15732	1.90179e-20	1.59382e-18
ENSMUSG00000062070	18655	Pgk1	protein_coding	phosphoglycerate kinase 1 [Source:MGI Symbol;Acc:MGI:97555]	2.60914	1.38357	1.53323	1.23391	2.03975e-20	1.67891e-18
ENSMUSG00000029249	19712	Rest	protein_coding	RE1-silencing transcription factor [Source:MGI Symbol;Acc:MGI:104897]	2.02628	1.01883	1.12946	0.908211	2.31358e-20	1.87089e-18
ENSMUSG00000029082	12182	Bst1	protein_coding	bone marrow stromal cell antigen 1 [Source:MGI Symbol;Acc:MGI:105370]	15.0774	3.91432	4.34047	3.48816	2.53155e-20	2.02349e-18
ENSMUSG00000028874	14191	Fgr	protein_coding	FGR proto-oncogene, Src family tyrosine kinase [Source:MGI Symbol;Acc:MGI:95527]	4.13615	2.04829	2.27165	1.82493	2.67126e-20	2.11076e-18
ENSMUSG00000028645	20525	Slc2a1	protein_coding	solute carrier family 2 (facilitated glucose transporter), member 1 [Source:MGI Symbol;Acc:MGI:95755]	3.4658	1.79319	1.98948	1.5969	3.03606e-20	2.35857e-18
ENSMUSG00000003541	15937	Ier3	protein_coding	immediate early response 3 [Source:MGI Symbol;Acc:MGI:104814]	4.67976	2.22644	2.47308	1.97979	4.51671e-20	3.35791e-18
ENSMUSG00000005057	23921	Sh2b2	protein_coding	SH2B adaptor protein 2 [Source:MGI Symbol;Acc:MGI:1345171]	3.87449	1.95401	2.17262	1.73539	6.27597e-20	4.59176e-18
ENSMUSG00000000628	15277	Hk2	protein_coding	hexokinase 2 [Source:MGI Symbol;Acc:MGI:1315197]	2.55456	1.35307	1.50451	1.20164	6.34912e-20	4.62083e-18
ENSMUSG00000049327	67956	Kmt5a	protein_coding	lysine methyltransferase 5A [Source:MGI Symbol;Acc:MGI:1915206]	2.60522	1.38141	1.53625	1.22656	6.68565e-20	4.80269e-18
ENSMUSG00000060703	66205	Cd302	protein_coding	CD302 antigen [Source:MGI Symbol;Acc:MGI:1913455]	2.65557	1.40902	1.56785	1.25019	8.05616e-20	5.65485e-18
ENSMUSG00000026773	170768	Pfkfb3	protein_coding	6-phosphofructo-2-kinase/fructose-2,6-biphosphatase 3 [Source:MGI Symbol;Acc:MGI:2181202]	2.48238	1.31172	1.46009	1.16336	9.01615e-20	6.23377e-18
ENSMUSG00000030142	56619	Clec4e	protein_coding	C-type lectin domain family 4, member e [Source:MGI Symbol;Acc:MGI:1861232]	3.79324	1.92343	2.14116	1.7057	9.25532e-20	6.33577e-18
ENSMUSG00000022895	23872	Ets2	protein_coding	E26 avian leukemia oncogene 2, 3' domain [Source:MGI Symbol;Acc:MGI:95456]	3.14615	1.65359	1.84103	1.46614	9.69319e-20	6.57046e-18
ENSMUSG00000026581	20343	Sell	protein_coding	selectin, lymphocyte [Source:MGI Symbol;Acc:MGI:98279]	7.15959	2.83988	3.16279	2.51697	1.07315e-19	7.16886e-18
ENSMUSG00000039747	269717	Orai2	protein_coding	ORAI calcium release-activated calcium modulator 2 [Source:MGI Symbol;Acc:MGI:2443195]	2.23417	1.15974	1.29213	1.02734	1.22446e-19	8.10133e-18
ENSMUSG00000031488	75767	Rab11fip1	protein_coding	RAB11 family interacting protein 1 (class I) [Source:MGI Symbol;Acc:MGI:1923017]	2.68137	1.42297	1.58576	1.26018	1.31271e-19	8.64389e-18
ENSMUSG00000046794	244416	Ppp1r3b	protein_coding	protein phosphatase 1, regulatory subunit 3B [Source:MGI Symbol;Acc:MGI:2177268]	2.572	1.36289	1.51926	1.20653	1.44372e-19	9.41685e-18
ENSMUSG00000059108	213002	Ifitm6	protein_coding	interferon induced transmembrane protein 6 [Source:MGI Symbol;Acc:MGI:2686976]	3.17082	1.66485	1.85644	1.47327	1.59353e-19	1.01576e-17
ENSMUSG00000071637	12609	Cebpd	protein_coding	CCAAT/enhancer binding protein (C/EBP), delta [Source:MGI Symbol;Acc:MGI:103573]	2.46582	1.30207	1.45186	1.15227	1.58117e-19	1.01576e-17
ENSMUSG00000047798	246746	Cd300lf	protein_coding	CD300 molecule like family member F [Source:MGI Symbol;Acc:MGI:2442359]	2.04628	1.03301	1.1519	0.91411	1.60397e-19	1.01742e-17
ENSMUSG00000041801	27280	Phlda3	protein_coding	pleckstrin homology like domain, family A, member 3 [Source:MGI Symbol;Acc:MGI:1351485]	2.72999	1.4489	1.61683	1.28096	2.02156e-19	1.2592e-17
ENSMUSG00000078763	20555	Slfn1	protein_coding	schlafen 1 [Source:MGI Symbol;Acc:MGI:1313259]	2.44032	1.28707	1.4364	1.13773	2.09192e-19	1.29718e-17
ENSMUSG00000041268	235380	Dmxl2	protein_coding	Dmx-like 2 [Source:MGI Symbol;Acc:MGI:2444630]	2.1958	1.13475	1.26718	1.00231	2.537e-19	1.51869e-17
ENSMUSG00000045551	14293	Fpr1	protein_coding	formyl peptide receptor 1 [Source:MGI Symbol;Acc:MGI:107443]	12.4105	3.63349	4.05784	3.20914	2.594e-19	1.53144e-17
ENSMUSG00000030187	16633	Klra2	protein_coding	killer cell lectin-like receptor, subfamily A, member 2 [Source:MGI Symbol;Acc:MGI:101906]	9.1987	3.20143	3.5754	2.82746	2.61367e-19	1.53144e-17
ENSMUSG00000027276	16449	Jag1	protein_coding	jagged 1 [Source:MGI Symbol;Acc:MGI:1095416]	3.95067	1.9821	2.21363	1.75056	2.61264e-19	1.53144e-17
ENSMUSG00000031714	14388	Gab1	protein_coding	growth factor receptor bound protein 2-associated protein 1 [Source:MGI Symbol;Acc:MGI:108088]	2.16205	1.1124	1.24314	0.981653	3.1997e-19	1.8208e-17
ENSMUSG00000027508	94212	Pag1	protein_coding	phosphoprotein associated with glycosphingolipid microdomains 1 [Source:MGI Symbol;Acc:MGI:2443160]	2.13361	1.09329	1.22202	0.964564	3.39247e-19	1.90695e-17
ENSMUSG00000025959	93691	Klf7	protein_coding	Kruppel-like factor 7 (ubiquitous) [Source:MGI Symbol;Acc:MGI:1935151]	2.52085	1.33391	1.49177	1.17606	4.0037e-19	2.24142e-17
ENSMUSG00000032724	99382	Abtb2	protein_coding	ankyrin repeat and BTB (POZ) domain containing 2 [Source:MGI Symbol;Acc:MGI:2139365]	4.52298	2.17727	2.4356	1.91894	4.36095e-19	2.41213e-17
ENSMUSG00000031586	19663	Rbpms	protein_coding	RNA binding protein gene with multiple splicing [Source:MGI Symbol;Acc:MGI:1334446]	3.78016	1.91845	2.14701	1.68988	4.99479e-19	2.75171e-17
ENSMUSG00000024529	16948	Lox	protein_coding	lysyl oxidase [Source:MGI Symbol;Acc:MGI:96817]	3.18678	1.6721	1.87439	1.46981	8.24431e-19	4.35123e-17
ENSMUSG00000029007	11610	Agtrap	protein_coding	angiotensin II, type I receptor-associated protein [Source:MGI Symbol;Acc:MGI:1339977]	2.00684	1.00493	1.12853	0.881319	1.41539e-18	7.16925e-17
ENSMUSG00000038527	232371	C1rl	protein_coding	complement component 1, r subcomponent-like [Source:MGI Symbol;Acc:MGI:2660692]	5.18936	2.37556	2.66856	2.08256	1.54714e-18	7.64065e-17
ENSMUSG00000031584	14782	Gsr	protein_coding	glutathione reductase [Source:MGI Symbol;Acc:MGI:95804]	2.37182	1.24599	1.39966	1.09233	1.54305e-18	7.64065e-17
ENSMUSG00000020108	74747	Ddit4	protein_coding	DNA-damage-inducible transcript 4 [Source:MGI Symbol;Acc:MGI:1921997]	5.78892	2.53329	2.84627	2.22032	1.63316e-18	7.96994e-17
ENSMUSG00000027611	19124	Procr	protein_coding	protein C receptor, endothelial [Source:MGI Symbol;Acc:MGI:104596]	10.0635	3.33106	3.74385	2.91827	1.80381e-18	8.63084e-17
ENSMUSG00000006494	228026	Pdk1	protein_coding	pyruvate dehydrogenase kinase, isoenzyme 1 [Source:MGI Symbol;Acc:MGI:1926119]	2.19927	1.13703	1.27801	0.996041	1.83787e-18	8.76347e-17
ENSMUSG00000028082	27059	Sh3d19	protein_coding	SH3 domain protein D19 [Source:MGI Symbol;Acc:MGI:1350923]	2.47643	1.30826	1.47091	1.14561	2.0031e-18	9.4214e-17
ENSMUSG00000003032	16600	Klf4	protein_coding	Kruppel-like factor 4 (gut) [Source:MGI Symbol;Acc:MGI:1342287]	3.06576	1.61625	1.81763	1.41486	2.15293e-18	1.00238e-16
ENSMUSG00000029759	269823	Pon3	protein_coding	paraoxonase 3 [Source:MGI Symbol;Acc:MGI:106686]	2.02801	1.02006	1.14727	0.89286	2.21076e-18	1.02586e-16
ENSMUSG00000026981	16181	Il1rn	protein_coding	interleukin 1 receptor antagonist [Source:MGI Symbol;Acc:MGI:96547]	3.01616	1.59271	1.79164	1.39379	2.32592e-18	1.07209e-16
ENSMUSG00000026980	17076	Ly75	protein_coding	lymphocyte antigen 75 [Source:MGI Symbol;Acc:MGI:106662]	11.7006	3.54851	3.99682	3.1002	3.37179e-18	1.5138e-16
ENSMUSG00000017390	11676	Aldoc	protein_coding	aldolase C, fructose-bisphosphate [Source:MGI Symbol;Acc:MGI:101863]	2.92182	1.54687	1.74415	1.34958	4.57746e-18	2.00307e-16
ENSMUSG00000095028	668101	Sirpb1b	protein_coding	signal-regulatory protein beta 1B [Source:MGI Symbol;Acc:MGI:3779828]	5.04312	2.33432	2.6337	2.03493	5.48311e-18	2.33294e-16
ENSMUSG00000031596	11988	Slc7a2	protein_coding	solute carrier family 7 (cationic amino acid transporter, y+ system), member 2 [Source:MGI Symbol;Acc:MGI:99828]	5.09377	2.34874	2.65415	2.04332	8.53703e-18	3.49021e-16
ENSMUSG00000029223	22223	Uchl1	protein_coding	ubiquitin carboxy-terminal hydrolase L1 [Source:MGI Symbol;Acc:MGI:103149]	4.5476	2.18511	2.46926	1.90095	8.55641e-18	3.49021e-16
ENSMUSG00000027737	26570	Slc7a11	protein_coding	solute carrier family 7 (cationic amino acid transporter, y+ system), member 11 [Source:MGI Symbol;Acc:MGI:1347355]	10.4807	3.38967	3.83341	2.94592	1.0594e-17	4.23392e-16
ENSMUSG00000050994	215772	Adgb	protein_coding	androglobin [Source:MGI Symbol;Acc:MGI:3605549]	7.28796	2.86551	3.24164	2.48939	1.15375e-17	4.58449e-16
ENSMUSG00000028124	14630	Gclm	protein_coding	glutamate-cysteine ligase, modifier subunit [Source:MGI Symbol;Acc:MGI:104995]	2.0294	1.02105	1.15583	0.886275	1.38027e-17	5.39163e-16
ENSMUSG00000003865	14936	Gys1	protein_coding	glycogen synthase 1, muscle [Source:MGI Symbol;Acc:MGI:101805]	2.91039	1.54121	1.74474	1.33768	1.39993e-17	5.44325e-16
ENSMUSG00000020826	18126	Nos2	protein_coding	nitric oxide synthase 2, inducible [Source:MGI Symbol;Acc:MGI:97361]	11.2616	3.49334	3.95656	3.03011	1.59765e-17	6.17102e-16
ENSMUSG00000025791	72157	Pgm1	protein_coding	phosphoglucomutase 1 [Source:MGI Symbol;Acc:MGI:97565]	2.41277	1.27069	1.43977	1.10162	1.78204e-17	6.80719e-16
ENSMUSG00000037613	79201	Tnfrsf23	protein_coding	tumor necrosis factor receptor superfamily, member 23 [Source:MGI Symbol;Acc:MGI:1930269]	2.51819	1.33239	1.51035	1.15443	2.01199e-17	7.60158e-16
ENSMUSG00000045636	102103	Mtus1	protein_coding	mitochondrial tumor suppressor 1 [Source:MGI Symbol;Acc:MGI:2142572]	2.23133	1.15791	1.31393	1.00189	2.6609e-17	9.83822e-16
ENSMUSG00000020057	71712	Dram1	protein_coding	DNA-damage regulated autophagy modulator 1 [Source:MGI Symbol;Acc:MGI:1918962]	2.03898	1.02785	1.16692	0.888778	3.03457e-17	1.10718e-15
ENSMUSG00000024424	72747	Ttc39c	protein_coding	tetratricopeptide repeat domain 39C [Source:MGI Symbol;Acc:MGI:1919997]	2.21956	1.15027	1.30649	0.994055	3.41791e-17	1.23402e-15
ENSMUSG00000035373	20306	Ccl7	protein_coding	chemokine (C-C motif) ligand 7 [Source:MGI Symbol;Acc:MGI:99512]	5.15937	2.36719	2.69043	2.04396	4.05894e-17	1.43181e-15
ENSMUSG00000029822	71720	Osbpl3	protein_coding	oxysterol binding protein-like 3 [Source:MGI Symbol;Acc:MGI:1918970]	2.40789	1.26777	1.44088	1.09466	4.05857e-17	1.43181e-15
ENSMUSG00000051379	71436	Flrt3	protein_coding	fibronectin leucine rich transmembrane protein 3 [Source:MGI Symbol;Acc:MGI:1918686]	6.52614	2.70623	3.07806	2.3344	4.94134e-17	1.72548e-15
ENSMUSG00000053101	353346	Gpr141	protein_coding	G protein-coupled receptor 141 [Source:MGI Symbol;Acc:MGI:2672983]	3.55163	1.82848	2.08013	1.57683	5.20984e-17	1.81465e-15
ENSMUSG00000031762	17750	Mt2	protein_coding	metallothionein 2 [Source:MGI Symbol;Acc:MGI:97172]	4.57659	2.19427	2.49726	1.89128	5.78207e-17	1.98892e-15
ENSMUSG00000020592	20969	Sdc1	protein_coding	syndecan 1 [Source:MGI Symbol;Acc:MGI:1349162]	4.57371	2.19336	2.49637	1.89036	5.86508e-17	2.01246e-15
ENSMUSG00000029490	243197	Mfsd7a	protein_coding	major facilitator superfamily domain containing 7A [Source:MGI Symbol;Acc:MGI:2442629]	2.59392	1.37513	1.56671	1.18356	7.65013e-17	2.57387e-15
ENSMUSG00000028480	384009	Glipr2	protein_coding	GLI pathogenesis-related 2 [Source:MGI Symbol;Acc:MGI:1917770]	4.16208	2.0573	2.34413	1.77048	7.83186e-17	2.62099e-15
ENSMUSG00000074272	26365	Ceacam1	protein_coding	carcinoembryonic antigen-related cell adhesion molecule 1 [Source:MGI Symbol;Acc:MGI:1347245]	2.06462	1.04587	1.19174	0.900004	7.92836e-17	2.64177e-15
ENSMUSG00000051934	72572	Spats2	protein_coding	spermatogenesis associated, serine-rich 2 [Source:MGI Symbol;Acc:MGI:1919822]	2.11217	1.07872	1.22921	0.928241	7.98204e-17	2.65326e-15
ENSMUSG00000028885	100340	Smpdl3b	protein_coding	sphingomyelin phosphodiesterase, acid-like 3B [Source:MGI Symbol;Acc:MGI:1916022]	3.61857	1.85542	2.11447	1.59637	8.19467e-17	2.71741e-15
ENSMUSG00000028517	67916	Plpp3	protein_coding	phospholipid phosphatase 3 [Source:MGI Symbol;Acc:MGI:1915166]	3.61012	1.85204	2.11152	1.59257	9.13398e-17	2.98593e-15
ENSMUSG00000037573	22057	Tob1	protein_coding	transducer of ErbB-2.1 [Source:MGI Symbol;Acc:MGI:1349721]	2.09458	1.06666	1.21688	0.916439	1.07631e-16	3.46122e-15
ENSMUSG00000030103	20893	Bhlhe40	protein_coding	basic helix-loop-helix family, member e40 [Source:MGI Symbol;Acc:MGI:1097714]	2.80327	1.48711	1.69745	1.27676	1.23317e-16	3.92005e-15
ENSMUSG00000068246	71898	Apol9b	protein_coding	apolipoprotein L 9b [Source:MGI Symbol;Acc:MGI:1919148]	3.01898	1.59406	1.82048	1.36764	1.4055e-16	4.40709e-15
ENSMUSG00000035385	20296	Ccl2	protein_coding	chemokine (C-C motif) ligand 2 [Source:MGI Symbol;Acc:MGI:98259]	3.59828	1.84731	2.11046	1.58416	1.53925e-16	4.78309e-15
ENSMUSG00000040675	270685	Mthfd1l	protein_coding	methylenetetrahydrofolate dehydrogenase (NADP+ dependent) 1-like [Source:MGI Symbol;Acc:MGI:1924836]	3.1943	1.6755	1.91453	1.43648	1.61131e-16	4.99579e-15
ENSMUSG00000021639	23894	Gtf2h2	protein_coding	general transcription factor II H, polypeptide 2 [Source:MGI Symbol;Acc:MGI:1345669]	2.08143	1.05758	1.20906	0.9061	1.82623e-16	5.58697e-15
ENSMUSG00000095788	320832	Sirpb1a	protein_coding	signal-regulatory protein beta 1A [Source:MGI Symbol;Acc:MGI:2444824]	4.62516	2.2095	2.52828	1.89072	2.29132e-16	6.87297e-15
ENSMUSG00000038811	14710	Gngt2	protein_coding	guanine nucleotide binding protein (G protein), gamma transducing activity polypeptide 2 [Source:MGI Symbol;Acc:MGI:893584]	2.21722	1.14875	1.31552	0.981988	2.77838e-16	8.13971e-15
ENSMUSG00000005800	17394	Mmp8	protein_coding	matrix metallopeptidase 8 [Source:MGI Symbol;Acc:MGI:1202395]	38.0525	5.24992	6.01216	4.48768	2.7903e-16	8.15736e-15
ENSMUSG00000025804	12768	Ccr1	protein_coding	chemokine (C-C motif) receptor 1 [Source:MGI Symbol;Acc:MGI:104618]	8.1225	3.02192	3.46081	2.58304	2.81563e-16	8.21403e-15
ENSMUSG00000050967	263764	Creg2	protein_coding	cellular repressor of E1A-stimulated genes 2 [Source:MGI Symbol;Acc:MGI:1928333]	2.16684	1.11559	1.27877	0.952407	3.51592e-16	1.00659e-14
ENSMUSG00000036552	381062	Ermard	protein_coding	ER membrane associated RNA degradation [Source:MGI Symbol;Acc:MGI:1917317]	2.11547	1.08098	1.24009	0.921858	4.27341e-16	1.20597e-14
ENSMUSG00000040624	213783	Plekhg1	protein_coding	pleckstrin homology domain containing, family G (with RhoGef domain) member 1 [Source:MGI Symbol;Acc:MGI:2676551]	2.76783	1.46876	1.68505	1.25247	4.32898e-16	1.21917e-14
ENSMUSG00000019256	11622	Ahr	protein_coding	aryl-hydrocarbon receptor [Source:MGI Symbol;Acc:MGI:105043]	2.98806	1.57921	1.81183	1.34659	4.36787e-16	1.22762e-14
ENSMUSG00000025491	68713	Ifitm1	protein_coding	interferon induced transmembrane protein 1 [Source:MGI Symbol;Acc:MGI:1915963]	2.51878	1.33272	1.52928	1.13617	4.53921e-16	1.26805e-14
ENSMUSG00000026829	227671	Gbgt1	protein_coding	globoside alpha-1,3-N-acetylgalactosaminyltransferase 1 [Source:MGI Symbol;Acc:MGI:2449143]	2.90853	1.54029	1.7675	1.31308	4.56288e-16	1.27209e-14
ENSMUSG00000028583	14726	Pdpn	protein_coding	podoplanin [Source:MGI Symbol;Acc:MGI:103098]	14.8802	3.89532	4.47817	3.31247	7.09067e-16	1.90019e-14
ENSMUSG00000026827	14571	Gpd2	protein_coding	glycerol phosphate dehydrogenase 2, mitochondrial [Source:MGI Symbol;Acc:MGI:99778]	2.01599	1.01149	1.16299	0.859995	7.30765e-16	1.95078e-14
ENSMUSG00000021125	11847	Arg2	protein_coding	arginase type II [Source:MGI Symbol;Acc:MGI:1330806]	10.2913	3.36336	3.86762	2.8591	7.53832e-16	2.00077e-14
ENSMUSG00000004151	14009	Etv1	protein_coding	ets variant 1 [Source:MGI Symbol;Acc:MGI:99254]	3.15973	1.6598	1.90947	1.41013	8.34499e-16	2.20218e-14
ENSMUSG00000033307	17319	Mif	protein_coding	macrophage migration inhibitory factor (glycosylation-inhibiting factor) [Source:MGI Symbol;Acc:MGI:96982]	2.21278	1.14586	1.31932	0.972396	1.01483e-15	2.62791e-14
ENSMUSG00000002997	19088	Prkar2b	protein_coding	protein kinase, cAMP dependent regulatory, type II beta [Source:MGI Symbol;Acc:MGI:97760]	2.48471	1.31307	1.51281	1.11334	1.1755e-15	3.01573e-14
ENSMUSG00000049422	103172	Chchd10	protein_coding	coiled-coil-helix-coiled-coil-helix domain containing 10 [Source:MGI Symbol;Acc:MGI:2143558]	2.55414	1.35284	1.55896	1.14672	1.23614e-15	3.15957e-14
ENSMUSG00000031987	112405	Egln1	protein_coding	egl-9 family hypoxia-inducible factor 1 [Source:MGI Symbol;Acc:MGI:1932286]	2.02402	1.01723	1.17239	0.862066	1.28006e-15	3.26581e-14
ENSMUSG00000050931	74442	Sgms2	protein_coding	sphingomyelin synthase 2 [Source:MGI Symbol;Acc:MGI:1921692]	8.42317	3.07436	3.54585	2.60288	1.51014e-15	3.81758e-14
ENSMUSG00000025591	66282	Tma16	protein_coding	translation machinery associated 16 [Source:MGI Symbol;Acc:MGI:1913532]	3.30244	1.72353	1.98824	1.45883	1.57874e-15	3.97646e-14
ENSMUSG00000034488	13612	Edil3	protein_coding	EGF-like repeats and discoidin I-like domains 3 [Source:MGI Symbol;Acc:MGI:1329025]	4.87585	2.28565	2.63855	1.93275	1.85574e-15	4.63197e-14
ENSMUSG00000001036	13855	Epn2	protein_coding	epsin 2 [Source:MGI Symbol;Acc:MGI:1333766]	2.70872	1.43761	1.65996	1.21526	1.95718e-15	4.86761e-14
ENSMUSG00000078566	12176	Bnip3	protein_coding	BCL2/adenovirus E1B interacting protein 3 [Source:MGI Symbol;Acc:MGI:109326]	3.30229	1.72347	1.9901	1.45684	1.97258e-15	4.8971e-14
ENSMUSG00000026580	20344	Selp	protein_coding	selectin, platelet [Source:MGI Symbol;Acc:MGI:98280]	22.9074	4.51774	5.22227	3.81322	2.51507e-15	6.17732e-14
ENSMUSG00000029442	269701	Wdr66	protein_coding	WD repeat domain 66 [Source:MGI Symbol;Acc:MGI:1918495]	4.96042	2.31046	2.67177	1.94916	2.73563e-15	6.6599e-14
ENSMUSG00000029084	12494	Cd38	protein_coding	CD38 antigen [Source:MGI Symbol;Acc:MGI:107474]	29.7566	4.89514	5.66245	4.12783	2.93961e-15	7.10644e-14
ENSMUSG00000017737	17395	Mmp9	protein_coding	matrix metallopeptidase 9 [Source:MGI Symbol;Acc:MGI:97011]	3.55684	1.8306	2.11844	1.54275	3.23158e-15	7.75803e-14
ENSMUSG00000040584	18671	Abcb1a	protein_coding	ATP-binding cassette, sub-family B (MDR/TAP), member 1A [Source:MGI Symbol;Acc:MGI:97570]	2.25881	1.17556	1.36096	0.990158	3.54051e-15	8.44106e-14
ENSMUSG00000016283	14990	H2-M2	protein_coding	histocompatibility 2, M region locus 2 [Source:MGI Symbol;Acc:MGI:95914]	3.57228	1.83685	2.12808	1.54561	4.15414e-15	9.78594e-14
ENSMUSG00000050737	64292	Ptges	protein_coding	prostaglandin E synthase [Source:MGI Symbol;Acc:MGI:1927593]	6.59645	2.72169	3.15479	2.28859	4.63688e-15	1.08126e-13
ENSMUSG00000022707	74185	Gbe1	protein_coding	glucan (1,4-alpha-), branching enzyme 1 [Source:MGI Symbol;Acc:MGI:1921435]	2.03683	1.02632	1.1899	0.862748	4.86504e-15	1.13065e-13
ENSMUSG00000058755	18413	Osm	protein_coding	oncostatin M [Source:MGI Symbol;Acc:MGI:104749]	2.08154	1.05765	1.22627	0.889029	4.90913e-15	1.13898e-13
ENSMUSG00000090231	14962	Cfb	protein_coding	complement factor B [Source:MGI Symbol;Acc:MGI:105975]	7.77049	2.95801	3.43258	2.48343	5.93552e-15	1.36113e-13
ENSMUSG00000036273	66725	Lrrk2	protein_coding	leucine-rich repeat kinase 2 [Source:MGI Symbol;Acc:MGI:1913975]	2.198	1.13619	1.31856	0.95382	6.01953e-15	1.37811e-13
ENSMUSG00000020788	53313	Atp2a3	protein_coding	ATPase, Ca++ transporting, ubiquitous [Source:MGI Symbol;Acc:MGI:1194503]	2.08832	1.06234	1.23306	0.891625	6.23535e-15	1.42281e-13
ENSMUSG00000049093	209590	Il23r	protein_coding	interleukin 23 receptor [Source:MGI Symbol;Acc:MGI:2181693]	71.2284	6.15438	7.14366	5.1651	6.28751e-15	1.43235e-13
ENSMUSG00000040339	329739	Fam102b	protein_coding	family with sequence similarity 102, member B [Source:MGI Symbol;Acc:MGI:3036259]	2.12587	1.08805	1.26376	0.912344	7.22217e-15	1.61599e-13
ENSMUSG00000039081	218820	Zfp503	protein_coding	zinc finger protein 503 [Source:MGI Symbol;Acc:MGI:1353644]	2.57043	1.36201	1.58335	1.14067	8.72943e-15	1.92214e-13
ENSMUSG00000052270	14289	Fpr2	protein_coding	formyl peptide receptor 2 [Source:MGI Symbol;Acc:MGI:1278319]	3.98812	1.99571	2.32345	1.66797	1.1941e-14	2.56001e-13
ENSMUSG00000026579	14067	F5	protein_coding	coagulation factor V [Source:MGI Symbol;Acc:MGI:88382]	31.9205	4.99641	5.81947	4.17335	1.30887e-14	2.79738e-13
ENSMUSG00000032487	19225	Ptgs2	protein_coding	prostaglandin-endoperoxide synthase 2 [Source:MGI Symbol;Acc:MGI:97798]	16.1341	4.01204	4.67486	3.34923	1.42636e-14	3.02975e-13
ENSMUSG00000028527	11639	Ak4	protein_coding	adenylate kinase 4 [Source:MGI Symbol;Acc:MGI:87979]	11.1132	3.4742	4.04826	2.90014	1.4339e-14	3.0411e-13
ENSMUSG00000056501	12608	Cebpb	protein_coding	CCAAT/enhancer binding protein (C/EBP), beta [Source:MGI Symbol;Acc:MGI:88373]	2.25624	1.17392	1.36832	0.979514	1.53192e-14	3.23454e-13
ENSMUSG00000031444	14058	F10	protein_coding	coagulation factor X [Source:MGI Symbol;Acc:MGI:103107]	7.23364	2.85472	3.32887	2.38057	1.67253e-14	3.47785e-13
ENSMUSG00000032024	71566	Clmp	protein_coding	CXADR-like membrane protein [Source:MGI Symbol;Acc:MGI:1918816]	5.72396	2.51701	2.93533	2.0987	1.70357e-14	3.52979e-13
ENSMUSG00000027398	16176	Il1b	protein_coding	interleukin 1 beta [Source:MGI Symbol;Acc:MGI:96543]	9.0692	3.18098	3.71273	2.64922	2.02514e-14	4.1061e-13
ENSMUSG00000048924	76041	Ccdc125	protein_coding	coiled-coil domain containing 125 [Source:MGI Symbol;Acc:MGI:1923291]	2.72649	1.44705	1.68986	1.20424	2.26323e-14	4.53565e-13
ENSMUSG00000029373	56744	Pf4	protein_coding	platelet factor 4 [Source:MGI Symbol;Acc:MGI:1888711]	2.80929	1.49021	1.74087	1.23954	2.43395e-14	4.85666e-13
ENSMUSG00000042498	102871	D330045A20Rik	protein_coding	RIKEN cDNA D330045A20 gene [Source:MGI Symbol;Acc:MGI:2147848]	5.32093	2.41168	2.81887	2.00448	2.72047e-14	5.3811e-13
ENSMUSG00000034394	16878	Lif	protein_coding	leukemia inhibitory factor [Source:MGI Symbol;Acc:MGI:96787]	37.0383	5.21094	6.09472	4.32717	3.10341e-14	6.08708e-13
ENSMUSG00000020334	30805	Slc22a4	protein_coding	solute carrier family 22 (organic cation transporter), member 4 [Source:MGI Symbol;Acc:MGI:1353479]	3.59956	1.84782	2.16549	1.53015	4.62387e-14	8.77077e-13
ENSMUSG00000029108	54216	Pcdh7	protein_coding	protocadherin 7 [Source:MGI Symbol;Acc:MGI:1860487]	2.21742	1.14888	1.34693	0.95084	5.00405e-14	9.453e-13
ENSMUSG00000036867	17130	Smad6	protein_coding	SMAD family member 6 [Source:MGI Symbol;Acc:MGI:1336883]	5.50199	2.45995	2.88446	2.03544	5.16636e-14	9.7463e-13
ENSMUSG00000025429	19201	Pstpip2	protein_coding	proline-serine-threonine phosphatase-interacting protein 2 [Source:MGI Symbol;Acc:MGI:1335088]	2.02087	1.01497	1.19048	0.839467	5.4819e-14	1.02855e-12
ENSMUSG00000046223	18793	Plaur	protein_coding	plasminogen activator, urokinase receptor [Source:MGI Symbol;Acc:MGI:97612]	2.10528	1.07401	1.26221	0.885822	8.06534e-14	1.47328e-12
ENSMUSG00000032715	228775	Trib3	protein_coding	tribbles pseudokinase 3 [Source:MGI Symbol;Acc:MGI:1345675]	3.63236	1.86091	2.18708	1.53473	8.14032e-14	1.48502e-12
ENSMUSG00000021360	14538	Gcnt2	protein_coding	glucosaminyl (N-acetyl) transferase 2, I-branching enzyme [Source:MGI Symbol;Acc:MGI:1100870]	3.35226	1.74513	2.05224	1.43803	9.13381e-14	1.65101e-12
ENSMUSG00000042766	360213	Trim46	protein_coding	tripartite motif-containing 46 [Source:MGI Symbol;Acc:MGI:2673000]	4.04929	2.01767	2.37547	1.65987	1.14161e-13	2.03692e-12
ENSMUSG00000030474	83382	Siglece	protein_coding	sialic acid binding Ig-like lectin E [Source:MGI Symbol;Acc:MGI:1932475]	3.24226	1.697	1.99859	1.39541	1.21553e-13	2.14666e-12
ENSMUSG00000022586	57248	Ly6i	protein_coding	lymphocyte antigen 6 complex, locus I [Source:MGI Symbol;Acc:MGI:1888480]	5.62632	2.49219	2.93521	2.04917	1.22433e-13	2.15944e-12
ENSMUSG00000060594	244864	Layn	protein_coding	layilin [Source:MGI Symbol;Acc:MGI:2685357]	2.67675	1.42048	1.67307	1.16789	1.23564e-13	2.17662e-12
ENSMUSG00000049723	17381	Mmp12	protein_coding	matrix metallopeptidase 12 [Source:MGI Symbol;Acc:MGI:97005]	2.20067	1.13794	1.34105	0.934831	1.37681e-13	2.4069e-12
ENSMUSG00000057346	223672	Apol9a	protein_coding	apolipoprotein L 9a [Source:MGI Symbol;Acc:MGI:3606001]	4.98487	2.31756	2.73165	1.90346	1.41961e-13	2.46923e-12
ENSMUSG00000030109	14411	Slc6a12	protein_coding	solute carrier family 6 (neurotransmitter transporter, betaine/GABA), member 12 [Source:MGI Symbol;Acc:MGI:95628]	3.32869	1.73495	2.04607	1.42384	1.57496e-13	2.71552e-12
ENSMUSG00000078780	381484	Gm5150	protein_coding	predicted gene 5150 [Source:MGI Symbol;Acc:MGI:3779469]	6.9814	2.80352	3.3091	2.29793	1.85287e-13	3.13989e-12
ENSMUSG00000058427	20310	Cxcl2	protein_coding	chemokine (C-X-C motif) ligand 2 [Source:MGI Symbol;Acc:MGI:1340094]	3.03816	1.6032	1.89574	1.31066	2.59557e-13	4.3295e-12
ENSMUSG00000020642	108089	Rnf144a	protein_coding	ring finger protein 144A [Source:MGI Symbol;Acc:MGI:1344401]	13.7169	3.77788	4.46964	3.08613	2.86512e-13	4.70533e-12
ENSMUSG00000041324	16323	Inhba	protein_coding	inhibin beta-A [Source:MGI Symbol;Acc:MGI:96570]	37.6988	5.23645	6.1964	4.2765	2.96247e-13	4.83078e-12
ENSMUSG00000022534	54483	Mefv	protein_coding	Mediterranean fever [Source:MGI Symbol;Acc:MGI:1859396]	3.22318	1.68848	2.00237	1.37459	4.40739e-13	7.0061e-12
ENSMUSG00000031647	71306	Mfap3l	protein_coding	microfibrillar-associated protein 3-like [Source:MGI Symbol;Acc:MGI:1918556]	2.44639	1.29066	1.53103	1.05028	4.64037e-13	7.34176e-12
ENSMUSG00000018906	18452	P4ha2	protein_coding	procollagen-proline, 2-oxoglutarate 4-dioxygenase (proline 4-hydroxylase), alpha II polypeptide [Source:MGI Symbol;Acc:MGI:894286]	2.52247	1.33484	1.58451	1.08516	5.24369e-13	8.22105e-12
ENSMUSG00000033227	22420	Wnt6	protein_coding	wingless-type MMTV integration site family, member 6 [Source:MGI Symbol;Acc:MGI:98960]	4.75254	2.2487	2.67026	1.82714	5.59008e-13	8.7542e-12
ENSMUSG00000090877	15511	Hspa1b	protein_coding	heat shock protein 1B [Source:MGI Symbol;Acc:MGI:99517]	3.12165	1.64231	1.9503	1.33431	5.64762e-13	8.82433e-12
ENSMUSG00000024778	14102	Fas	protein_coding	Fas (TNF receptor superfamily member 6) [Source:MGI Symbol;Acc:MGI:95484]	2.24945	1.16957	1.3897	0.949438	6.25284e-13	9.69331e-12
ENSMUSG00000018500	11541	Adora2b	protein_coding	adenosine A2b receptor [Source:MGI Symbol;Acc:MGI:99403]	3.23966	1.69584	2.01732	1.37437	7.64493e-13	1.17591e-11
ENSMUSG00000049409	58182	Prokr1	protein_coding	prokineticin receptor 1 [Source:MGI Symbol;Acc:MGI:1929676]	3.66884	1.87532	2.23578	1.51487	1.12658e-12	1.69699e-11
ENSMUSG00000028680	12795	Plk3	protein_coding	polo like kinase 3 [Source:MGI Symbol;Acc:MGI:109604]	2.67014	1.41691	1.69097	1.14286	1.34111e-12	1.99837e-11
ENSMUSG00000033420	69538	Antxr1	protein_coding	anthrax toxin receptor 1 [Source:MGI Symbol;Acc:MGI:1916788]	2.52332	1.33532	1.5947	1.07594	1.51024e-12	2.23593e-11
ENSMUSG00000040734	333654	Ppp1r13l	protein_coding	protein phosphatase 1, regulatory subunit 13 like [Source:MGI Symbol;Acc:MGI:3525053]	2.55106	1.3511	1.61396	1.08823	1.57862e-12	2.31732e-11
ENSMUSG00000023473	107934	Celsr3	protein_coding	cadherin, EGF LAG seven-pass G-type receptor 3 [Source:MGI Symbol;Acc:MGI:1858236]	2.08568	1.06052	1.26709	0.853948	1.63033e-12	2.3806e-11
ENSMUSG00000042284	109700	Itga1	protein_coding	integrin alpha 1 [Source:MGI Symbol;Acc:MGI:96599]	32.8366	5.03723	6.02321	4.05126	1.86652e-12	2.70265e-11
ENSMUSG00000029379	330122	Cxcl3	protein_coding	chemokine (C-X-C motif) ligand 3 [Source:MGI Symbol;Acc:MGI:3037818]	21.6688	4.43755	5.30655	3.56855	1.89094e-12	2.73228e-11
ENSMUSG00000026558	80914	Uck2	protein_coding	uridine-cytidine kinase 2 [Source:MGI Symbol;Acc:MGI:1931744]	5.22121	2.38438	2.85602	1.91275	2.49311e-12	3.53225e-11
ENSMUSG00000035863	18483	Palm	protein_coding	paralemmin [Source:MGI Symbol;Acc:MGI:1261814]	2.38924	1.25655	1.50539	1.00771	2.57548e-12	3.64215e-11
ENSMUSG00000008318	320100	Relt	protein_coding	RELT tumor necrosis factor receptor [Source:MGI Symbol;Acc:MGI:2443373]	2.73631	1.45223	1.74166	1.1628	3.0672e-12	4.27123e-11
ENSMUSG00000031740	17390	Mmp2	protein_coding	matrix metallopeptidase 2 [Source:MGI Symbol;Acc:MGI:97009]	4.72343	2.23983	2.6906	1.78907	4.00188e-12	5.49084e-11
ENSMUSG00000031722	15439	Hp	protein_coding	haptoglobin [Source:MGI Symbol;Acc:MGI:96211]	75.0096	6.229	7.48506	4.97295	4.22195e-12	5.74618e-11
ENSMUSG00000047205	75219	Dusp18	protein_coding	dual specificity phosphatase 18 [Source:MGI Symbol;Acc:MGI:1922469]	2.36213	1.24009	1.49049	0.989692	4.38082e-12	5.93901e-11
ENSMUSG00000026822	16819	Lcn2	protein_coding	lipocalin 2 [Source:MGI Symbol;Acc:MGI:96757]	27.6329	4.78831	5.76275	3.81387	5.41643e-12	7.20177e-11
ENSMUSG00000033213	433470	AA467197	protein_coding	expressed sequence AA467197 [Source:MGI Symbol;Acc:MGI:3034182]	4.05015	2.01797	2.42989	1.60606	5.88105e-12	7.78212e-11
ENSMUSG00000032561	56318	Acpp	protein_coding	acid phosphatase, prostate [Source:MGI Symbol;Acc:MGI:1928480]	17.7568	4.1503	4.99972	3.30087	6.31913e-12	8.32199e-11
ENSMUSG00000030344	11642	Akap3	protein_coding	A kinase (PRKA) anchor protein 3 [Source:MGI Symbol;Acc:MGI:1341149]	3.04829	1.608	1.93752	1.27849	6.5348e-12	8.58151e-11
ENSMUSG00000042265	58217	Trem1	protein_coding	triggering receptor expressed on myeloid cells 1 [Source:MGI Symbol;Acc:MGI:1930005]	33.3988	5.06172	6.10182	4.02163	7.03583e-12	9.14393e-11
ENSMUSG00000050953	14609	Gja1	protein_coding	gap junction protein, alpha 1 [Source:MGI Symbol;Acc:MGI:95713]	5.40453	2.43417	2.9363	1.93204	7.81407e-12	1.01173e-10
ENSMUSG00000021493	67399	Pdlim7	protein_coding	PDZ and LIM domain 7 [Source:MGI Symbol;Acc:MGI:1914649]	2.35164	1.23367	1.49107	0.976255	1.06173e-11	1.34325e-10
ENSMUSG00000028076	12479	Cd1d1	protein_coding	CD1d1 antigen [Source:MGI Symbol;Acc:MGI:107674]	2.58382	1.3695	1.65573	1.08328	1.10998e-11	1.39535e-10
ENSMUSG00000029322	231507	Plac8	protein_coding	placenta-specific 8 [Source:MGI Symbol;Acc:MGI:2445289]	4.31772	2.11027	2.55181	1.66873	1.14357e-11	1.43107e-10
ENSMUSG00000038521	50908	C1s1	protein_coding	complement component 1, s subcomponent 1 [Source:MGI Symbol;Acc:MGI:1355312]	23.8342	4.57496	5.53308	3.61683	1.17208e-11	1.46542e-10
ENSMUSG00000028613	16975	Lrp8	protein_coding	low density lipoprotein receptor-related protein 8, apolipoprotein e receptor [Source:MGI Symbol;Acc:MGI:1340044]	2.47719	1.30871	1.58347	1.03394	1.25293e-11	1.55945e-10
ENSMUSG00000098470	667277	C1rb	protein_coding	complement component 1, r subcomponent B [Source:MGI Symbol;Acc:MGI:3779804]	3.76482	1.91258	2.31415	1.51101	1.25446e-11	1.55995e-10
ENSMUSG00000021614	13003	Vcan	protein_coding	versican [Source:MGI Symbol;Acc:MGI:102889]	16.8055	4.07086	4.92817	3.21355	1.35948e-11	1.67848e-10
ENSMUSG00000040502	216438	44629	protein_coding	membrane-associated ring finger (C3HC4) 9 [Source:MGI Symbol;Acc:MGI:2446144]	2.26441	1.17913	1.42793	0.93034	1.42978e-11	1.76055e-10
ENSMUSG00000070691	12399	Runx3	protein_coding	runt related transcription factor 3 [Source:MGI Symbol;Acc:MGI:102672]	5.9101	2.56318	3.10493	2.02144	1.49593e-11	1.83616e-10
ENSMUSG00000045094	328967	Arhgef37	protein_coding	Rho guanine nucleotide exchange factor (GEF) 37 [Source:MGI Symbol;Acc:MGI:3045339]	4.4764	2.16234	2.62075	1.70393	1.6213e-11	1.98226e-10
ENSMUSG00000026826	18227	Nr4a2	protein_coding	nuclear receptor subfamily 4, group A, member 2 [Source:MGI Symbol;Acc:MGI:1352456]	5.07385	2.34308	2.84281	1.84335	1.9016e-11	2.31473e-10
ENSMUSG00000053338	245126	Tarm1	protein_coding	T cell-interacting, activating receptor on myeloid cells 1 [Source:MGI Symbol;Acc:MGI:2442280]	36.7785	5.20079	6.31441	4.08717	2.11122e-11	2.55415e-10
ENSMUSG00000059343	353204	Aldoart1	protein_coding	aldolase 1 A, retrogene 1 [Source:MGI Symbol;Acc:MGI:2447811]	2.24829	1.16883	1.42078	0.916873	2.51763e-11	3.00638e-10
ENSMUSG00000091971	193740	Hspa1a	protein_coding	heat shock protein 1A [Source:MGI Symbol;Acc:MGI:96244]	3.02598	1.5974	1.94254	1.25226	2.67553e-11	3.18942e-10
ENSMUSG00000027864	19221	Ptgfrn	protein_coding	prostaglandin F2 receptor negative regulator [Source:MGI Symbol;Acc:MGI:1277114]	3.51016	1.81153	2.20398	1.41909	2.86801e-11	3.40712e-10
ENSMUSG00000035105	112407	Egln3	protein_coding	egl-9 family hypoxia-inducible factor 3 [Source:MGI Symbol;Acc:MGI:1932288]	9.77034	3.28841	4.00684	2.56998	3.57649e-11	4.15849e-10
ENSMUSG00000028214	14579	Gem	protein_coding	GTP binding protein (gene overexpressed in skeletal muscle) [Source:MGI Symbol;Acc:MGI:99844]	4.6377	2.21341	2.70033	1.72648	4.28106e-11	4.92091e-10
ENSMUSG00000063611	NA	Gm10134	protein_coding	predicted gene 10134 [Source:MGI Symbol;Acc:MGI:3642322]	3.06103	1.61402	1.9722	1.25583	5.36874e-11	6.09515e-10
ENSMUSG00000062939	20849	Stat4	protein_coding	signal transducer and activator of transcription 4 [Source:MGI Symbol;Acc:MGI:103062]	3.12382	1.64331	2.00896	1.27766	5.7478e-11	6.49883e-10
ENSMUSG00000027347	19419	Rasgrp1	protein_coding	RAS guanyl releasing protein 1 [Source:MGI Symbol;Acc:MGI:1314635]	2.54424	1.34724	1.65013	1.04435	7.50093e-11	8.36475e-10
ENSMUSG00000026072	16177	Il1r1	protein_coding	interleukin 1 receptor, type I [Source:MGI Symbol;Acc:MGI:96545]	29.3498	4.87528	5.97503	3.77552	8.17219e-11	9.05489e-10
ENSMUSG00000006342	71733	Susd2	protein_coding	sushi domain containing 2 [Source:MGI Symbol;Acc:MGI:1918983]	15.6196	3.96529	4.86007	3.0705	8.24295e-11	9.10412e-10
ENSMUSG00000013974	69189	Mcemp1	protein_coding	mast cell expressed membrane protein 1 [Source:MGI Symbol;Acc:MGI:1916439]	9.27524	3.21338	3.93975	2.48702	8.61377e-11	9.48338e-10
ENSMUSG00000062345	18788	Serpinb2	protein_coding	serine (or cysteine) peptidase inhibitor, clade B, member 2 [Source:MGI Symbol;Acc:MGI:97609]	44.5748	5.47816	6.71732	4.23899	8.76914e-11	9.62379e-10
ENSMUSG00000027399	16175	Il1a	protein_coding	interleukin 1 alpha [Source:MGI Symbol;Acc:MGI:96542]	44.0708	5.46175	6.69885	4.22465	9.07208e-11	9.9169e-10
ENSMUSG00000050103	319660	Agmo	protein_coding	alkylglycerol monooxygenase [Source:MGI Symbol;Acc:MGI:2442495]	2.43622	1.28465	1.57664	0.992652	9.91686e-11	1.07053e-09
ENSMUSG00000074115	20208	Saa1	protein_coding	serum amyloid A 1 [Source:MGI Symbol;Acc:MGI:98221]	35.7114	5.15831	6.33333	3.98329	1.04834e-10	1.12288e-09
ENSMUSG00000043421	69573	Hilpda	protein_coding	hypoxia inducible lipid droplet associated [Source:MGI Symbol;Acc:MGI:1916823]	3.11082	1.6373	2.01582	1.25878	1.52445e-10	1.57785e-09
ENSMUSG00000030108	14412	Slc6a13	protein_coding	solute carrier family 6 (neurotransmitter transporter, GABA), member 13 [Source:MGI Symbol;Acc:MGI:95629]	4.141	2.04998	2.52487	1.5751	1.60392e-10	1.65639e-09
ENSMUSG00000055632	665700	Hmcn2	protein_coding	hemicentin 2 [Source:MGI Symbol;Acc:MGI:2677838]	3.3711	1.75322	2.16025	1.34619	1.69511e-10	1.74275e-09
ENSMUSG00000071454	13528	Dtnb	protein_coding	dystrobrevin, beta [Source:MGI Symbol;Acc:MGI:1203728]	2.13067	1.0913	1.34472	0.837887	1.70459e-10	1.7512e-09
ENSMUSG00000036256	29817	Igfbp7	protein_coding	insulin-like growth factor binding protein 7 [Source:MGI Symbol;Acc:MGI:1352480]	14.845	3.8919	4.79669	2.98711	1.75406e-10	1.79801e-09
ENSMUSG00000050914	654824	Ankrd37	protein_coding	ankyrin repeat domain 37 [Source:MGI Symbol;Acc:MGI:3603344]	3.5343	1.82142	2.24679	1.39606	1.96475e-10	1.99037e-09
ENSMUSG00000032374	26432	Plod2	protein_coding	procollagen lysine, 2-oxoglutarate 5-dioxygenase 2 [Source:MGI Symbol;Acc:MGI:1347007]	2.78545	1.47791	1.8235	1.13233	2.02901e-10	2.04947e-09
ENSMUSG00000036564	234593	Ndrg4	protein_coding	N-myc downstream regulated gene 4 [Source:MGI Symbol;Acc:MGI:2384590]	2.74512	1.45687	1.79808	1.11566	2.11116e-10	2.12778e-09
ENSMUSG00000021640	17940	Naip1	protein_coding	NLR family, apoptosis inhibitory protein 1 [Source:MGI Symbol;Acc:MGI:1298223]	4.04247	2.01524	2.48836	1.54212	2.24212e-10	2.2483e-09
ENSMUSG00000049848	319930	Ceacam19	protein_coding	carcinoembryonic antigen-related cell adhesion molecule 19 [Source:MGI Symbol;Acc:MGI:2443001]	2.41222	1.27036	1.57044	0.970283	2.61213e-10	2.59487e-09
ENSMUSG00000025701	11689	Alox5	protein_coding	arachidonate 5-lipoxygenase [Source:MGI Symbol;Acc:MGI:87999]	2.46502	1.3016	1.60948	0.993726	2.70178e-10	2.67049e-09
ENSMUSG00000017002	20568	Slpi	protein_coding	secretory leukocyte peptidase inhibitor [Source:MGI Symbol;Acc:MGI:109297]	89.8468	6.4894	8.02535	4.95344	2.74471e-10	2.70905e-09
ENSMUSG00000073418	12268	C4b	protein_coding	complement component 4B (Chido blood group) [Source:MGI Symbol;Acc:MGI:88228]	2.0716	1.05074	1.29977	0.801718	2.83622e-10	2.79141e-09
ENSMUSG00000055493	13853	Epm2a	protein_coding	epilepsy, progressive myoclonic epilepsy, type 2 gene alpha [Source:MGI Symbol;Acc:MGI:1341085]	2.69283	1.42912	1.76812	1.09012	2.89873e-10	2.84887e-09
ENSMUSG00000022584	100041546	Ly6c2	protein_coding	lymphocyte antigen 6 complex, locus C2 [Source:MGI Symbol;Acc:MGI:3712069]	21.3713	4.4176	5.46986	3.36535	3.21302e-10	3.12885e-09
ENSMUSG00000024186	50782	Rgs11	protein_coding	regulator of G-protein signaling 11 [Source:MGI Symbol;Acc:MGI:1354739]	3.29955	1.72227	2.14108	1.30347	5.3368e-10	5.05807e-09
ENSMUSG00000039196	18405	Orm1	protein_coding	orosomucoid 1 [Source:MGI Symbol;Acc:MGI:97443]	12.9917	3.69951	4.60314	2.79589	5.94709e-10	5.58574e-09
ENSMUSG00000009376	17295	Met	protein_coding	met proto-oncogene [Source:MGI Symbol;Acc:MGI:96969]	2.21449	1.14698	1.42871	0.865239	6.81804e-10	6.31056e-09
ENSMUSG00000025746	16193	Il6	protein_coding	interleukin 6 [Source:MGI Symbol;Acc:MGI:96559]	24.3693	4.60699	5.73891	3.47508	6.85971e-10	6.34065e-09
ENSMUSG00000089665	NA	Fcor	protein_coding	Foxo1 corepressor [Source:MGI Symbol;Acc:MGI:1915484]	6.46851	2.69343	3.35898	2.02788	7.87378e-10	7.23927e-09
ENSMUSG00000038067	12985	Csf3	protein_coding	colony stimulating factor 3 (granulocyte) [Source:MGI Symbol;Acc:MGI:1339751]	33.293	5.05715	6.32027	3.79403	1.01932e-09	9.20652e-09
ENSMUSG00000025321	320910	Itgb8	protein_coding	integrin beta 8 [Source:MGI Symbol;Acc:MGI:1338035]	4.73186	2.24241	2.81327	1.67154	1.60414e-09	1.40928e-08
ENSMUSG00000039693	66665	Msantd3	protein_coding	Myb/SANT-like DNA-binding domain containing 3 [Source:MGI Symbol;Acc:MGI:1913915]	4.61335	2.20582	2.77359	1.63804	2.0793e-09	1.79592e-08
ENSMUSG00000032204	64008	Aqp9	protein_coding	aquaporin 9 [Source:MGI Symbol;Acc:MGI:1891066]	22.4119	4.48619	5.64816	3.32422	2.40638e-09	2.05531e-08
ENSMUSG00000028341	18124	Nr4a3	protein_coding	nuclear receptor subfamily 4, group A, member 3 [Source:MGI Symbol;Acc:MGI:1352457]	5.18755	2.37505	2.99222	1.75788	2.59642e-09	2.19861e-08
ENSMUSG00000059040	433182	Eno1b	protein_coding	enolase 1B, retrotransposed [Source:MGI Symbol;Acc:MGI:3648653]	2.63217	1.39625	1.76359	1.02891	3.45846e-09	2.8792e-08
ENSMUSG00000024924	22359	Vldlr	protein_coding	very low density lipoprotein receptor [Source:MGI Symbol;Acc:MGI:98935]	2.77969	1.47493	1.86491	1.08495	3.88021e-09	3.21098e-08
ENSMUSG00000037411	18787	Serpine1	protein_coding	serine (or cysteine) peptidase inhibitor, clade E, member 1 [Source:MGI Symbol;Acc:MGI:97608]	3.29869	1.72189	2.18029	1.2635	4.536e-09	3.69616e-08
ENSMUSG00000003955	70186	Fam162a	protein_coding	family with sequence similarity 162, member A [Source:MGI Symbol;Acc:MGI:1917436]	2.19501	1.13423	1.43634	0.832111	4.59449e-09	3.73941e-08
ENSMUSG00000029380	14825	Cxcl1	protein_coding	chemokine (C-X-C motif) ligand 1 [Source:MGI Symbol;Acc:MGI:108068]	3.16653	1.6629	2.11213	1.21367	6.33354e-09	5.07417e-08
ENSMUSG00000003849	18104	Nqo1	protein_coding	NAD(P)H dehydrogenase, quinone 1 [Source:MGI Symbol;Acc:MGI:103187]	2.91261	1.54231	1.96111	1.12351	7.11356e-09	5.62094e-08
ENSMUSG00000061654	236576	Spry3	protein_coding	sprouty RTK signaling antagonist 3 [Source:NCBI gene;Acc:236576]	2.28267	1.19072	1.51469	0.866752	7.43659e-09	5.83948e-08
ENSMUSG00000055407	17760	Map6	protein_coding	microtubule-associated protein 6 [Source:MGI Symbol;Acc:MGI:1201690]	2.45123	1.29351	1.64911	0.937907	9.38118e-09	7.23497e-08
ENSMUSG00000037161	67749	Mgarp	protein_coding	mitochondria localized glutamic acid rich protein [Source:MGI Symbol;Acc:MGI:1914999]	26.0108	4.70104	6.00087	3.40121	1.06633e-08	8.13756e-08
ENSMUSG00000030214	66857	Plbd1	protein_coding	phospholipase B domain containing 1 [Source:MGI Symbol;Acc:MGI:1914107]	2.61481	1.38671	1.77224	1.00117	1.20434e-08	9.1303e-08
ENSMUSG00000039395	381269	Mreg	protein_coding	melanoregulin [Source:MGI Symbol;Acc:MGI:2151839]	8.29498	3.05224	3.91736	2.18712	1.83997e-08	1.36059e-07
ENSMUSG00000006179	54373	Prss16	protein_coding	protease, serine 16 (thymus) [Source:MGI Symbol;Acc:MGI:1859181]	2.08065	1.05703	1.35714	0.756925	1.9085e-08	1.41052e-07
ENSMUSG00000033287	72844	Kctd17	protein_coding	potassium channel tetramerisation domain containing 17 [Source:MGI Symbol;Acc:MGI:1920094]	2.21022	1.14419	1.47209	0.816284	2.33751e-08	1.70656e-07
ENSMUSG00000031779	20299	Ccl22	protein_coding	chemokine (C-C motif) ligand 22 [Source:MGI Symbol;Acc:MGI:1306779]	6.84822	2.77573	3.57331	1.97815	2.47473e-08	1.79825e-07
ENSMUSG00000067279	53412	Ppp1r3c	protein_coding	protein phosphatase 1, regulatory subunit 3C [Source:MGI Symbol;Acc:MGI:1858229]	5.81649	2.54015	3.27337	1.80693	2.72958e-08	1.96823e-07
ENSMUSG00000025934	14859	Gsta3	protein_coding	glutathione S-transferase, alpha 3 [Source:MGI Symbol;Acc:MGI:95856]	3.88121	1.95651	2.52207	1.39094	2.81525e-08	2.0244e-07
ENSMUSG00000036661	105841	Dennd3	protein_coding	DENN/MADD domain containing 3 [Source:MGI Symbol;Acc:MGI:2146009]	5.93288	2.56873	3.31382	1.82364	3.02937e-08	2.16935e-07
ENSMUSG00000001588	216859	Acap1	protein_coding	ArfGAP with coiled-coil, ankyrin repeat and PH domains 1 [Source:MGI Symbol;Acc:MGI:2388270]	2.186	1.12829	1.45564	0.800946	3.04364e-08	2.17732e-07
ENSMUSG00000090145	394435	Ugt1a6b	protein_coding	UDP glucuronosyltransferase 1 family, polypeptide A6B [Source:MGI Symbol;Acc:MGI:3580629]	2.72235	1.44485	1.866	1.02371	3.36189e-08	2.38768e-07
ENSMUSG00000028111	13038	Ctsk	protein_coding	cathepsin K [Source:MGI Symbol;Acc:MGI:107823]	2.03777	1.02699	1.32652	0.727465	3.40509e-08	2.41464e-07
ENSMUSG00000020785	55984	Camkk1	protein_coding	calcium/calmodulin-dependent protein kinase kinase 1, alpha [Source:MGI Symbol;Acc:MGI:1891766]	17.5437	4.13288	5.34592	2.91984	3.89564e-08	2.74421e-07
ENSMUSG00000013418	14422	B4galnt2	protein_coding	beta-1,4-N-acetyl-galactosaminyl transferase 2 [Source:MGI Symbol;Acc:MGI:1342058]	3.74586	1.90529	2.46693	1.34366	4.26636e-08	2.98408e-07
ENSMUSG00000020407	22271	Upp1	protein_coding	uridine phosphorylase 1 [Source:MGI Symbol;Acc:MGI:1097668]	13.3161	3.7351	4.84146	2.62875	4.72381e-08	3.26604e-07
ENSMUSG00000038540	233424	Tmc3	protein_coding	transmembrane channel-like gene family 3 [Source:MGI Symbol;Acc:MGI:2669033]	2.26894	1.18202	1.53287	0.831165	4.93627e-08	3.39765e-07
ENSMUSG00000053198	19153	Prx	protein_coding	periaxin [Source:MGI Symbol;Acc:MGI:108176]	2.34986	1.23258	1.60064	0.864518	5.59572e-08	3.82112e-07
ENSMUSG00000029314	231510	Gpat3	protein_coding	glycerol-3-phosphate acyltransferase 3 [Source:MGI Symbol;Acc:MGI:3603816]	4.20633	2.07256	2.69322	1.45191	5.93867e-08	4.03142e-07
ENSMUSG00000027221	76969	Chst1	protein_coding	carbohydrate sulfotransferase 1 [Source:MGI Symbol;Acc:MGI:1924219]	3.50195	1.80816	2.3517	1.26462	6.42667e-08	4.32658e-07
ENSMUSG00000043079	104027	Synpo	protein_coding	synaptopodin [Source:MGI Symbol;Acc:MGI:1099446]	2.23929	1.16304	1.51336	0.812731	6.6984e-08	4.49189e-07
ENSMUSG00000030498	14453	Gas2	protein_coding	growth arrest specific 2 [Source:MGI Symbol;Acc:MGI:95657]	3.39288	1.76251	2.29508	1.22994	7.15638e-08	4.76219e-07
ENSMUSG00000073771	NA	Btbd19	protein_coding	BTB (POZ) domain containing 19 [Source:MGI Symbol;Acc:MGI:1925861]	2.08921	1.06296	1.38415	0.741769	7.15585e-08	4.76219e-07
ENSMUSG00000020178	11540	Adora2a	protein_coding	adenosine A2a receptor [Source:MGI Symbol;Acc:MGI:99402]	2.85685	1.51442	1.97709	1.05176	8.97042e-08	5.84557e-07
ENSMUSG00000022074	21933	Tnfrsf10b	protein_coding	tumor necrosis factor receptor superfamily, member 10b [Source:MGI Symbol;Acc:MGI:1341090]	2.28598	1.19281	1.5607	0.824925	1.08841e-07	7.02311e-07
ENSMUSG00000011171	22355	Vipr2	protein_coding	vasoactive intestinal peptide receptor 2 [Source:MGI Symbol;Acc:MGI:107166]	8.40719	3.07162	4.02414	2.11911	1.21521e-07	7.78316e-07
ENSMUSG00000007783	78070	Cpt1c	protein_coding	carnitine palmitoyltransferase 1c [Source:MGI Symbol;Acc:MGI:2446526]	4.87198	2.28451	2.99531	1.57371	1.29993e-07	8.2874e-07
ENSMUSG00000050075	229323	Gpr171	protein_coding	G protein-coupled receptor 171 [Source:MGI Symbol;Acc:MGI:2442043]	4.52393	2.17758	2.85733	1.49782	1.38853e-07	8.80356e-07
ENSMUSG00000070942	107527	Il1rl2	protein_coding	interleukin 1 receptor-like 2 [Source:MGI Symbol;Acc:MGI:1913107]	4.72723	2.241	2.94089	1.54111	1.402e-07	8.88491e-07
ENSMUSG00000024548	240427	Setbp1	protein_coding	SET binding protein 1 [Source:MGI Symbol;Acc:MGI:1933199]	22.2888	4.47825	5.88822	3.06828	1.64808e-07	1.03027e-06
ENSMUSG00000047671	242646	Tctex1d4	protein_coding	Tctex1 domain containing 4 [Source:MGI Symbol;Acc:MGI:3045358]	2.70582	1.43607	1.88929	0.982843	1.72828e-07	1.07603e-06
ENSMUSG00000035914	102657	Cd276	protein_coding	CD276 antigen [Source:MGI Symbol;Acc:MGI:2183926]	3.19587	1.67621	2.20581	1.1466	1.76726e-07	1.09931e-06
ENSMUSG00000064147	442827	Rab44	protein_coding	RAB44, member RAS oncogene family [Source:MGI Symbol;Acc:MGI:3045302]	6.36863	2.67098	3.51621	1.82575	1.82288e-07	1.13137e-06
ENSMUSG00000062991	211323	Nrg1	protein_coding	neuregulin 1 [Source:MGI Symbol;Acc:MGI:96083]	23.0918	4.52931	5.97804	3.08058	2.25213e-07	1.37616e-06
ENSMUSG00000034987	15466	Hrh2	protein_coding	histamine receptor H2 [Source:MGI Symbol;Acc:MGI:108482]	3.01326	1.59132	2.10126	1.08139	2.33503e-07	1.4243e-06
ENSMUSG00000022236	252967	Ropn1l	protein_coding	ropporin 1-like [Source:MGI Symbol;Acc:MGI:2182357]	2.08997	1.06348	1.40505	0.721921	2.44095e-07	1.48041e-06
ENSMUSG00000074604	211666	Mgst2	protein_coding	microsomal glutathione S-transferase 2 [Source:MGI Symbol;Acc:MGI:2448481]	2.53911	1.34432	1.77616	0.912492	2.44889e-07	1.48393e-06
ENSMUSG00000023045	223920	Soat2	protein_coding	sterol O-acyltransferase 2 [Source:MGI Symbol;Acc:MGI:1332226]	2.95194	1.56166	2.0673	1.05603	2.85763e-07	1.70914e-06
ENSMUSG00000003545	14282	Fosb	protein_coding	FBJ osteosarcoma oncogene B [Source:MGI Symbol;Acc:MGI:95575]	3.42147	1.77462	2.35588	1.19335	3.57265e-07	2.11165e-06
ENSMUSG00000028542	14664	Slc6a9	protein_coding	solute carrier family 6 (neurotransmitter transporter, glycine), member 9 [Source:MGI Symbol;Acc:MGI:95760]	6.47468	2.69481	3.58335	1.80627	4.05622e-07	2.37265e-06
ENSMUSG00000096140	100043332	Ankrd66	protein_coding	ankyrin repeat domain 66 [Source:MGI Symbol;Acc:MGI:1925106]	5.96202	2.5758	3.42625	1.72535	4.16233e-07	2.42651e-06
ENSMUSG00000022864	67102	D16Ertd472e	protein_coding	DNA segment, Chr 16, ERATO Doi 472, expressed [Source:MGI Symbol;Acc:MGI:1196400]	2.47432	1.30703	1.73883	0.875238	4.2093e-07	2.45182e-06
ENSMUSG00000032578	12700	Cish	protein_coding	cytokine inducible SH2-containing protein [Source:MGI Symbol;Acc:MGI:103159]	2.65455	1.40847	1.87929	0.937644	5.26308e-07	3.02989e-06
ENSMUSG00000055602	21462	Tcp10b	protein_coding	t-complex protein 10b [Source:MGI Symbol;Acc:MGI:98542]	4.98895	2.31874	3.10027	1.5372	6.14516e-07	3.49692e-06
ENSMUSG00000037922	242248	Bank1	protein_coding	B cell scaffold protein with ankyrin repeats 1 [Source:MGI Symbol;Acc:MGI:2442120]	2.6034	1.3804	1.84891	0.911879	6.99727e-07	3.93692e-06
ENSMUSG00000040562	14863	Gstm2	protein_coding	glutathione S-transferase, mu 2 [Source:MGI Symbol;Acc:MGI:95861]	3.30499	1.72465	2.31071	1.13858	7.15613e-07	4.01929e-06
ENSMUSG00000091898	21924	Tnnc1	protein_coding	troponin C, cardiac/slow skeletal [Source:MGI Symbol;Acc:MGI:98779]	2.88288	1.52751	2.05199	1.00303	8.66296e-07	4.80126e-06
ENSMUSG00000022602	11838	Arc	protein_coding	activity regulated cytoskeletal-associated protein [Source:MGI Symbol;Acc:MGI:88067]	3.18624	1.67186	2.24755	1.09616	9.133e-07	5.04182e-06
ENSMUSG00000037071	20249	Scd1	protein_coding	stearoyl-Coenzyme A desaturase 1 [Source:MGI Symbol;Acc:MGI:98239]	2.93609	1.5539	2.089	1.01879	9.14245e-07	5.04275e-06
ENSMUSG00000026271	64095	Gpr35	protein_coding	G protein-coupled receptor 35 [Source:MGI Symbol;Acc:MGI:1929509]	2.42962	1.28073	1.72177	0.839695	9.14198e-07	5.04275e-06
ENSMUSG00000035783	11475	Acta2	protein_coding	actin, alpha 2, smooth muscle, aorta [Source:MGI Symbol;Acc:MGI:87909]	2.88216	1.52715	2.05574	0.998552	1.00395e-06	5.50899e-06
ENSMUSG00000007655	12389	Cav1	protein_coding	caveolin 1, caveolae protein [Source:MGI Symbol;Acc:MGI:102709]	3.04625	1.60703	2.16333	1.05074	1.00546e-06	5.5151e-06
ENSMUSG00000056671	77619	Prelid2	protein_coding	PRELI domain containing 2 [Source:MGI Symbol;Acc:MGI:1924869]	2.05418	1.03856	1.40041	0.676715	1.13099e-06	6.14995e-06
ENSMUSG00000037683	70882	Armc3	protein_coding	armadillo repeat containing 3 [Source:MGI Symbol;Acc:MGI:1918132]	2.37449	1.24762	1.6833	0.81194	1.1787e-06	6.38176e-06
ENSMUSG00000023911	76917	Flywch2	protein_coding	FLYWCH family member 2 [Source:MGI Symbol;Acc:MGI:1924167]	3.58347	1.84136	2.48498	1.19773	1.19898e-06	6.47385e-06
ENSMUSG00000022661	17470	Cd200	protein_coding	CD200 antigen [Source:MGI Symbol;Acc:MGI:1196990]	2.3651	1.2419	1.67603	0.807776	1.20065e-06	6.47782e-06
ENSMUSG00000021403	20706	Serpinb9b	protein_coding	serine (or cysteine) peptidase inhibitor, clade B, member 9b [Source:MGI Symbol;Acc:MGI:894668]	3.70487	1.88942	2.55128	1.22757	1.2466e-06	6.69956e-06
ENSMUSG00000051682	224840	Treml4	protein_coding	triggering receptor expressed on myeloid cells-like 4 [Source:MGI Symbol;Acc:MGI:1923239]	7.71419	2.94752	3.98233	1.9127	1.298e-06	6.93536e-06
ENSMUSG00000022790	207683	Igsf11	protein_coding	immunoglobulin superfamily, member 11 [Source:MGI Symbol;Acc:MGI:2388477]	2.12798	1.08948	1.47898	0.699987	1.79259e-06	9.38582e-06
ENSMUSG00000022791	51789	Tnk2	protein_coding	tyrosine kinase, non-receptor, 2 [Source:MGI Symbol;Acc:MGI:1858308]	3.00381	1.58679	2.1562	1.01738	1.91441e-06	9.96706e-06
ENSMUSG00000060429	20649	Sntb1	protein_coding	syntrophin, basic 1 [Source:MGI Symbol;Acc:MGI:101781]	4.26105	2.09121	2.86017	1.32224	2.92486e-06	1.4678e-05
ENSMUSG00000038463	320078	Olfml2b	protein_coding	olfactomedin-like 2B [Source:MGI Symbol;Acc:MGI:2443310]	3.2732	1.7107	2.34685	1.07456	3.5409e-06	1.75623e-05
ENSMUSG00000027315	20732	Spint1	protein_coding	serine protease inhibitor, Kunitz type 1 [Source:MGI Symbol;Acc:MGI:1338033]	6.79928	2.76538	3.80757	1.72319	4.43409e-06	2.16659e-05
ENSMUSG00000026235	13838	Epha4	protein_coding	Eph receptor A4 [Source:MGI Symbol;Acc:MGI:98277]	4.45254	2.15463	2.96935	1.33991	4.68716e-06	2.27737e-05
ENSMUSG00000034997	15558	Htr2a	protein_coding	5-hydroxytryptamine (serotonin) receptor 2A [Source:MGI Symbol;Acc:MGI:109521]	2.30388	1.20407	1.66428	0.743856	5.59982e-06	2.68589e-05
ENSMUSG00000000730	54427	Dnmt3l	protein_coding	DNA (cytosine-5-)-methyltransferase 3-like [Source:MGI Symbol;Acc:MGI:1859287]	5.49183	2.45729	3.41751	1.49706	8.0237e-06	3.75217e-05
ENSMUSG00000037989	75607	Wnk2	protein_coding	WNK lysine deficient protein kinase 2 [Source:MGI Symbol;Acc:MGI:1922857]	4.41731	2.14317	2.98763	1.2987	9.16419e-06	4.24389e-05
ENSMUSG00000039835	215819	Nhsl1	protein_coding	NHS-like 1 [Source:MGI Symbol;Acc:MGI:106390]	2.72525	1.44639	2.01902	0.873762	9.88112e-06	4.54242e-05
ENSMUSG00000044770	268297	Scml4	protein_coding	Scm polycomb group protein like 4 [Source:MGI Symbol;Acc:MGI:2446140]	4.27882	2.09721	2.9325	1.26193	1.08625e-05	4.95405e-05
ENSMUSG00000027834	20713	Serpini1	protein_coding	serine (or cysteine) peptidase inhibitor, clade I, member 1 [Source:MGI Symbol;Acc:MGI:1194506]	3.03556	1.60196	2.24011	0.963814	1.08923e-05	4.96598e-05
ENSMUSG00000031379	69656	Pir	protein_coding	pirin [Source:MGI Symbol;Acc:MGI:1916906]	2.09191	1.06482	1.48967	0.639975	1.11661e-05	5.08079e-05
ENSMUSG00000023960	83965	Enpp5	protein_coding	ectonucleotide pyrophosphatase/phosphodiesterase 5 [Source:MGI Symbol;Acc:MGI:1933830]	2.31398	1.21037	1.69422	0.726528	1.15065e-05	5.22365e-05
ENSMUSG00000031443	14068	F7	protein_coding	coagulation factor VII [Source:MGI Symbol;Acc:MGI:109325]	3.69084	1.88395	2.65093	1.11697	1.52712e-05	6.77045e-05
ENSMUSG00000026994	14425	Galnt3	protein_coding	polypeptide N-acetylgalactosaminyltransferase 3 [Source:MGI Symbol;Acc:MGI:894695]	2.12802	1.08951	1.53363	0.645392	1.55713e-05	6.89024e-05
ENSMUSG00000024968	104383	Rcor2	protein_coding	REST corepressor 2 [Source:MGI Symbol;Acc:MGI:1859854]	2.47424	1.30699	1.85114	0.762831	2.14465e-05	9.23582e-05
ENSMUSG00000063296	320709	Tmem117	protein_coding	transmembrane protein 117 [Source:MGI Symbol;Acc:MGI:2444580]	6.62221	2.72731	3.87483	1.5798	2.50803e-05	0.000106743
ENSMUSG00000038677	268935	Scube3	protein_coding	signal peptide, CUB domain, EGF-like 3 [Source:MGI Symbol;Acc:MGI:3045253]	2.44896	1.29217	1.84086	0.743479	2.87023e-05	0.000120894
ENSMUSG00000054855	223881	Rnd1	protein_coding	Rho family GTPase 1 [Source:MGI Symbol;Acc:MGI:2444878]	2.07356	1.05211	1.49993	0.60429	2.97178e-05	0.000124791
ENSMUSG00000046598	71911	Bdh1	protein_coding	3-hydroxybutyrate dehydrogenase, type 1 [Source:MGI Symbol;Acc:MGI:1919161]	2.63234	1.39635	1.99148	0.80122	3.02948e-05	0.000127137
ENSMUSG00000021699	238871	Pde4d	protein_coding	phosphodiesterase 4D, cAMP specific [Source:MGI Symbol;Acc:MGI:99555]	2.20528	1.14096	1.62979	0.652135	3.26799e-05	0.000136414
ENSMUSG00000016024	16803	Lbp	protein_coding	lipopolysaccharide binding protein [Source:MGI Symbol;Acc:MGI:1098776]	6.11395	2.6121	3.73766	1.48655	3.54996e-05	0.000147458
ENSMUSG00000001039	27078	B9d1	protein_coding	B9 protein domain 1 [Source:MGI Symbol;Acc:MGI:1351471]	2.3634	1.24086	1.77711	0.704612	3.70165e-05	0.000152887
ENSMUSG00000022863	12228	Btg3	protein_coding	B cell translocation gene 3 [Source:MGI Symbol;Acc:MGI:109532]	2.15617	1.10847	1.59229	0.624653	4.26401e-05	0.000174394
ENSMUSG00000028364	21923	Tnc	protein_coding	tenascin C [Source:MGI Symbol;Acc:MGI:101922]	3.45582	1.78903	2.57305	1.00501	4.51418e-05	0.000183702
ENSMUSG00000073010	331493	Gm5127	protein_coding	predicted gene 5127 [Source:MGI Symbol;Acc:MGI:3648285]	4.83604	2.27383	3.2828	1.26485	5.37343e-05	0.000215623
ENSMUSG00000026043	12825	Col3a1	protein_coding	collagen, type III, alpha 1 [Source:MGI Symbol;Acc:MGI:88453]	8.38454	3.06773	4.43621	1.69925	5.78133e-05	0.000230653
ENSMUSG00000024486	15200	Hbegf	protein_coding	heparin-binding EGF-like growth factor [Source:MGI Symbol;Acc:MGI:96070]	2.8363	1.50401	2.17711	0.830913	6.04485e-05	0.000240196
ENSMUSG00000022218	21816	Tgm1	protein_coding	transglutaminase 1, K polypeptide [Source:MGI Symbol;Acc:MGI:98730]	2.04626	1.03299	1.49553	0.570445	6.08894e-05	0.00024167
ENSMUSG00000003352	12297	Cacnb3	protein_coding	calcium channel, voltage-dependent, beta 3 subunit [Source:MGI Symbol;Acc:MGI:103307]	2.42791	1.27971	1.86149	0.69794	7.48375e-05	0.000291837
ENSMUSG00000019929	13179	Dcn	protein_coding	decorin [Source:MGI Symbol;Acc:MGI:94872]	3.36788	1.75184	2.57846	0.925223	0.000122211	0.000457851
ENSMUSG00000019992	71804	Mtfr2	protein_coding	mitochondrial fission regulator 2 [Source:MGI Symbol;Acc:MGI:1919054]	2.26163	1.17736	1.73576	0.618958	0.000130525	0.000486626
ENSMUSG00000046997	211949	Spsb4	protein_coding	splA/ryanodine receptor domain and SOCS box containing 4 [Source:MGI Symbol;Acc:MGI:2183445]	2.08971	1.0633	1.57041	0.556194	0.000140071	0.000519276
ENSMUSG00000050860	237928	Phospho1	protein_coding	phosphatase, orphan 1 [Source:MGI Symbol;Acc:MGI:2447348]	2.79823	1.48452	2.19718	0.771851	0.000152228	0.000561185
ENSMUSG00000040329	16196	Il7	protein_coding	interleukin 7 [Source:MGI Symbol;Acc:MGI:96561]	2.22915	1.1565	1.72182	0.591171	0.000190677	0.000686455
ENSMUSG00000052062	72823	Pard3b	protein_coding	par-3 family cell polarity regulator beta [Source:MGI Symbol;Acc:MGI:1919301]	2.22753	1.15544	1.72076	0.590128	0.000192783	0.000692958
ENSMUSG00000024620	18596	Pdgfrb	protein_coding	platelet derived growth factor receptor, beta polypeptide [Source:MGI Symbol;Acc:MGI:97531]	2.44302	1.28867	1.92061	0.65672	0.000198301	0.000710233
ENSMUSG00000036766	227325	Dner	protein_coding	delta/notch-like EGF repeat containing [Source:MGI Symbol;Acc:MGI:2152889]	2.11558	1.08106	1.6144	0.547718	0.000213429	0.000758495
ENSMUSG00000063558	11761	Aox1	protein_coding	aldehyde oxidase 1 [Source:MGI Symbol;Acc:MGI:88035]	2.27008	1.18275	1.76756	0.597929	0.000219326	0.000776018
ENSMUSG00000025140	209027	Pycr1	protein_coding	pyrroline-5-carboxylate reductase 1 [Source:MGI Symbol;Acc:MGI:2384795]	2.51583	1.33103	1.99216	0.66991	0.000231665	0.000817003
ENSMUSG00000024011	74116	Pi16	protein_coding	peptidase inhibitor 16 [Source:MGI Symbol;Acc:MGI:1921366]	3.27893	1.71322	2.56925	0.857206	0.000248773	0.000870235
ENSMUSG00000064179	21955	Tnnt1	protein_coding	troponin T1, skeletal, slow [Source:MGI Symbol;Acc:MGI:1333868]	2.24585	1.16726	1.75153	0.582995	0.000254134	0.000887639
ENSMUSG00000014846	67971	Tppp3	protein_coding	tubulin polymerization-promoting protein family member 3 [Source:MGI Symbol;Acc:MGI:1915221]	2.75923	1.46427	2.20956	0.718972	0.000309657	0.00106067
ENSMUSG00000021768	27389	Dusp13	protein_coding	dual specificity phosphatase 13 [Source:MGI Symbol;Acc:MGI:1351599]	2.03351	1.02397	1.54575	0.502186	0.000313811	0.00107039
ENSMUSG00000002475	106861	Abhd3	protein_coding	abhydrolase domain containing 3 [Source:MGI Symbol;Acc:MGI:2147183]	2.04185	1.02987	1.55833	0.501415	0.000340247	0.00115345
ENSMUSG00000079018	17067	Ly6c1	protein_coding	lymphocyte antigen 6 complex, locus C1 [Source:MGI Symbol;Acc:MGI:96882]	2.05581	1.03971	1.58252	0.496895	0.000414629	0.00137165
ENSMUSG00000024770	70166	Lipn	protein_coding	lipase, family member N [Source:MGI Symbol;Acc:MGI:1917416]	2.81316	1.49219	2.27357	0.710809	0.000428876	0.00141505
ENSMUSG00000021362	107889	Gcm2	protein_coding	glial cells missing homolog 2 [Source:MGI Symbol;Acc:MGI:1861438]	3.26046	1.70507	2.60202	0.808135	0.000451409	0.00147987
ENSMUSG00000001506	12842	Col1a1	protein_coding	collagen, type I, alpha 1 [Source:MGI Symbol;Acc:MGI:88467]	2.13191	1.09215	1.67803	0.506271	0.00056043	0.00179889
ENSMUSG00000041954	21936	Tnfrsf18	protein_coding	tumor necrosis factor receptor superfamily, member 18 [Source:MGI Symbol;Acc:MGI:894675]	2.061	1.04335	1.60343	0.483259	0.000564684	0.00181003
ENSMUSG00000002808	105298	Epdr1	protein_coding	ependymin related protein 1 (zebrafish) [Source:MGI Symbol;Acc:MGI:2145369]	2.05156	1.03672	1.60003	0.473418	0.000643538	0.00204102
ENSMUSG00000020186	13008	Csrp2	protein_coding	cysteine and glycine-rich protein 2 [Source:MGI Symbol;Acc:MGI:1202907]	2.09976	1.07023	1.65754	0.482918	0.000715245	0.00224323
ENSMUSG00000032494	21667	Tdgf1	protein_coding	teratocarcinoma-derived growth factor 1 [Source:MGI Symbol;Acc:MGI:98658]	3.22699	1.69019	2.62496	0.755413	0.000776282	0.00241603
ENSMUSG00000032514	74052	Ttc21a	protein_coding	tetratricopeptide repeat domain 21A [Source:MGI Symbol;Acc:MGI:1921302]	2.23957	1.16322	1.82515	0.501303	0.00103987	0.00313753
ENSMUSG00000021643	20365	Serf1	protein_coding	small EDRK-rich factor 1 [Source:MGI Symbol;Acc:MGI:1337114]	2.07417	1.05253	1.65347	0.45159	0.00107543	0.00323282
ENSMUSG00000020473	11568	Aebp1	protein_coding	AE binding protein 1 [Source:MGI Symbol;Acc:MGI:1197012]	2.07342	1.05201	1.65489	0.449133	0.00111608	0.00333907
ENSMUSG00000053963	381310	Stum	protein_coding	mechanosensory transduction mediator [Source:MGI Symbol;Acc:MGI:2138735]	2.18887	1.13019	1.7885	0.471877	0.00131032	0.00384776
ENSMUSG00000015314	30925	Slamf6	protein_coding	SLAM family member 6 [Source:MGI Symbol;Acc:MGI:1353620]	2.26697	1.18076	1.87296	0.488568	0.00139444	0.00406029
ENSMUSG00000030825	66065	Hsd17b14	protein_coding	hydroxysteroid (17-beta) dehydrogenase 14 [Source:MGI Symbol;Acc:MGI:1913315]	2.08499	1.06004	1.68371	0.436369	0.00144377	0.00418772
ENSMUSG00000024912	14283	Fosl1	protein_coding	fos-like antigen 1 [Source:MGI Symbol;Acc:MGI:107179]	2.66888	1.41624	2.26281	0.569665	0.00167892	0.00480764
ENSMUSG00000020086	404634	H2afy2	protein_coding	H2A histone family, member Y2 [Source:MGI Symbol;Acc:MGI:3037658]	2.10181	1.07163	1.71231	0.430954	0.00168133	0.00481256
ENSMUSG00000070323	234911	Mmp27	protein_coding	matrix metallopeptidase 27 [Source:MGI Symbol;Acc:MGI:3039232]	2.07262	1.05146	1.71518	0.387738	0.00274872	0.00745864
ENSMUSG00000028347	230157	Tmeff1	protein_coding	transmembrane protein with EGF-like and two follistatin-like domains 1 [Source:MGI Symbol;Acc:MGI:1926810]	2.00999	1.00719	1.66412	0.350256	0.00363053	0.0095734
ENSMUSG00000040957	63955	Cables1	protein_coding	CDK5 and Abl enzyme substrate 1 [Source:MGI Symbol;Acc:MGI:1927065]	-2.13821	-1.09641	-0.407186	-1.78562	0.00265071	0.00723102
ENSMUSG00000028687	70603	Mutyh	protein_coding	mutY DNA glycosylase [Source:MGI Symbol;Acc:MGI:1917853]	-2.22517	-1.15392	-0.433953	-1.87388	0.00248174	0.00681174
ENSMUSG00000025270	11656	Alas2	protein_coding	aminolevulinic acid synthase 2, erythroid [Source:MGI Symbol;Acc:MGI:87990]	-2.0813	-1.05749	-0.423605	-1.69137	0.00172322	0.00492023
ENSMUSG00000028051	15168	Hcn3	protein_coding	hyperpolarization-activated, cyclic nucleotide-gated K+ 3 [Source:MGI Symbol;Acc:MGI:1298211]	-2.7534	-1.46121	-0.595613	-2.32681	0.0015414	0.00444329
ENSMUSG00000079001	NA	4930404H24Rik	protein_coding	RIKEN cDNA 4930404H24 gene [Source:MGI Symbol;Acc:MGI:1925401]	-2.49995	-1.3219	-0.541764	-2.10203	0.00148707	0.00429852
ENSMUSG00000045273	26886	Cenph	protein_coding	centromere protein H [Source:MGI Symbol;Acc:MGI:1349448]	-2.43167	-1.28195	-0.535248	-2.02865	0.0013102	0.00384776
ENSMUSG00000046295	234396	Ankle1	protein_coding	ankyrin repeat and LEM domain containing 1 [Source:MGI Symbol;Acc:MGI:1918775]	-2.54052	-1.34512	-0.565967	-2.12428	0.00124087	0.00367502
ENSMUSG00000093668	75507	Pou5f2	protein_coding	POU domain class 5, transcription factor 2 [Source:MGI Symbol;Acc:MGI:1922757]	-2.07109	-1.05039	-0.450879	-1.6499	0.00107172	0.00322272
ENSMUSG00000003992	66970	Ssbp2	protein_coding	single-stranded DNA binding protein 2 [Source:MGI Symbol;Acc:MGI:1914220]	-2.10743	-1.07549	-0.463101	-1.68787	0.00104658	0.00315377
ENSMUSG00000032911	121021	Cspg4	protein_coding	chondroitin sulfate proteoglycan 4 [Source:MGI Symbol;Acc:MGI:2153093]	-3.09095	-1.62805	-0.702497	-2.5536	0.00103005	0.00311266
ENSMUSG00000031257	237038	Nox1	protein_coding	NADPH oxidase 1 [Source:MGI Symbol;Acc:MGI:2450016]	-2.3256	-1.2176	-0.544674	-1.89054	0.000770541	0.0023987
ENSMUSG00000055675	74901	Kbtbd11	protein_coding	kelch repeat and BTB (POZ) domain containing 11 [Source:MGI Symbol;Acc:MGI:1922151]	-2.85539	-1.51369	-0.689808	-2.33757	0.000655495	0.00207609
ENSMUSG00000039396	234258	Neil3	protein_coding	nei like 3 (E. coli) [Source:MGI Symbol;Acc:MGI:2384588]	-2.36187	-1.23993	-0.571039	-1.90882	0.000595579	0.00190332
ENSMUSG00000030029	16206	Lrig1	protein_coding	leucine-rich repeats and immunoglobulin-like domains 1 [Source:MGI Symbol;Acc:MGI:107935]	-2.47336	-1.30647	-0.607864	-2.00509	0.000541152	0.0017443
ENSMUSG00000022034	71988	Esco2	protein_coding	establishment of sister chromatid cohesion N-acetyltransferase 2 [Source:MGI Symbol;Acc:MGI:1919238]	-2.08432	-1.05957	-0.495694	-1.62345	0.000513437	0.00166428
ENSMUSG00000032113	12649	Chek1	protein_coding	checkpoint kinase 1 [Source:MGI Symbol;Acc:MGI:1202065]	-2.64563	-1.40361	-0.657178	-2.15005	0.000509397	0.00165234
ENSMUSG00000082229	17954	Nap1l2	protein_coding	nucleosome assembly protein 1-like 2 [Source:MGI Symbol;Acc:MGI:106654]	-2.07289	-1.05164	-0.49768	-1.6056	0.000458338	0.00149938
ENSMUSG00000022033	52033	Pbk	protein_coding	PDZ binding kinase [Source:MGI Symbol;Acc:MGI:1289156]	-2.46871	-1.30376	-0.622091	-1.98542	0.000421546	0.00139253
ENSMUSG00000027961	109245	Lrrc39	protein_coding	leucine rich repeat containing 39 [Source:MGI Symbol;Acc:MGI:1924557]	-2.18839	-1.12987	-0.545702	-1.71404	0.000371154	0.00124359
ENSMUSG00000060512	76261	0610040J01Rik	protein_coding	RIKEN cDNA 0610040J01 gene [Source:MGI Symbol;Acc:MGI:1923511]	-2.8023	-1.48661	-0.723256	-2.24997	0.000342996	0.0011602
ENSMUSG00000034295	225288	Fhod3	protein_coding	formin homology 2 domain containing 3 [Source:MGI Symbol;Acc:MGI:1925847]	-2.88906	-1.5306	-0.744641	-2.31656	0.000343077	0.0011602
ENSMUSG00000090164	232406	BC035044	protein_coding	cDNA sequence BC035044 [Source:MGI Symbol;Acc:MGI:2448540]	-3.45632	-1.78924	-0.871488	-2.70699	0.000338699	0.00114849
ENSMUSG00000001827	14275	Folr1	protein_coding	folate receptor 1 (adult) [Source:MGI Symbol;Acc:MGI:95568]	-2.0536	-1.03816	-0.507596	-1.56872	0.000324669	0.00110362
ENSMUSG00000072949	26897	Acot1	protein_coding	acyl-CoA thioesterase 1 [Source:MGI Symbol;Acc:MGI:1349396]	-3.26566	-1.70737	-0.837752	-2.577	0.000312116	0.00106777
ENSMUSG00000029602	19415	Rasal1	protein_coding	RAS protein activator like 1 (GAP1 like) [Source:MGI Symbol;Acc:MGI:1330842]	-2.90265	-1.53737	-0.759427	-2.31532	0.000289139	0.000996813
ENSMUSG00000022235	69574	Cmbl	protein_coding	carboxymethylenebutenolidase-like (Pseudomonas) [Source:MGI Symbol;Acc:MGI:1916824]	-2.29062	-1.19574	-0.59114	-1.80033	0.00028649	0.000988912
ENSMUSG00000024268	108013	Celf4	protein_coding	CUGBP, Elav-like family member 4 [Source:MGI Symbol;Acc:MGI:1932407]	-2.23624	-1.16107	-0.576663	-1.74548	0.000271516	0.000941927
ENSMUSG00000030346	19362	Rad51ap1	protein_coding	RAD51 associated protein 1 [Source:MGI Symbol;Acc:MGI:1098224]	-2.08913	-1.0629	-0.535705	-1.5901	0.000227747	0.000803595
ENSMUSG00000045103	13405	Dmd	protein_coding	dystrophin, muscular dystrophy [Source:MGI Symbol;Acc:MGI:94909]	-4.72101	-2.23909	-1.12956	-3.34863	0.000225157	0.000795064
ENSMUSG00000074780	NA	Anapc15-ps	protein_coding	anaphase prompoting complex C subunit 15, pseudogene [Source:MGI Symbol;Acc:MGI:3646302]	-3.67361	-1.8772	-0.960413	-2.79398	0.000188542	0.000680008
ENSMUSG00000026069	17082	Il1rl1	protein_coding	interleukin 1 receptor-like 1 [Source:MGI Symbol;Acc:MGI:98427]	-3.83359	-1.9387	-0.994142	-2.88325	0.000183049	0.000662965
ENSMUSG00000051065	239796	Mb21d2	protein_coding	Mab-21 domain containing 2 [Source:MGI Symbol;Acc:MGI:1917028]	-2.13412	-1.09364	-0.571121	-1.61617	0.000143327	0.000530493
ENSMUSG00000024617	12322	Camk2a	protein_coding	calcium/calmodulin-dependent protein kinase II alpha [Source:MGI Symbol;Acc:MGI:88256]	-3.40341	-1.76698	-0.934245	-2.59972	0.000120288	0.000451015
ENSMUSG00000074227	20733	Spint2	protein_coding	serine protease inhibitor, Kunitz type 2 [Source:MGI Symbol;Acc:MGI:1338031]	-2.28574	-1.19266	-0.630744	-1.75458	0.00011986	0.000449531
ENSMUSG00000009614	192166	Sardh	protein_coding	sarcosine dehydrogenase [Source:MGI Symbol;Acc:MGI:2183102]	-7.83185	-2.96935	-1.57847	-4.36023	0.000111161	0.000419525
ENSMUSG00000032656	320253	44623	protein_coding	membrane-associated ring finger (C3HC4) 3 [Source:MGI Symbol;Acc:MGI:2443667]	-2.31673	-1.21209	-0.670808	-1.75337	5.86782e-05	0.000233834
ENSMUSG00000027692	665113	Tnik	protein_coding	TRAF2 and NCK interacting kinase [Source:MGI Symbol;Acc:MGI:1916264]	-2.3648	-1.24172	-0.697879	-1.78555	4.47561e-05	0.000182187
ENSMUSG00000094091	102639132	Gm21885	protein_coding	predicted gene, 21885 [Source:MGI Symbol;Acc:MGI:5434049]	-2.16967	-1.11747	-0.630609	-1.60434	4.15597e-05	0.000170429
ENSMUSG00000027454	69270	Gins1	protein_coding	GINS complex subunit 1 (Psf1 homolog) [Source:MGI Symbol;Acc:MGI:1916520]	-2.03972	-1.02837	-0.5859	-1.47084	3.47524e-05	0.000144615
ENSMUSG00000027323	19361	Rad51	protein_coding	RAD51 recombinase [Source:MGI Symbol;Acc:MGI:97890]	-2.05106	-1.03637	-0.594374	-1.47836	3.05862e-05	0.000128282
ENSMUSG00000046442	320472	Ppm1e	protein_coding	protein phosphatase 1E (PP2C domain containing) [Source:MGI Symbol;Acc:MGI:2444096]	-2.15395	-1.10699	-0.640209	-1.57376	2.58974e-05	0.000110052
ENSMUSG00000050132	237868	Sarm1	protein_coding	sterile alpha and HEAT/Armadillo motif containing 1 [Source:MGI Symbol;Acc:MGI:2136419]	-2.73634	-1.45225	-0.844651	-2.05984	2.3069e-05	9.8822e-05
ENSMUSG00000031861	53978	Lpar2	protein_coding	lysophosphatidic acid receptor 2 [Source:MGI Symbol;Acc:MGI:1858422]	-2.49337	-1.3181	-0.767088	-1.8691	2.27834e-05	9.76595e-05
ENSMUSG00000035109	271849	Shc4	protein_coding	SHC (Src homology 2 domain containing) family, member 4 [Source:MGI Symbol;Acc:MGI:2655364]	-2.22427	-1.15333	-0.673474	-1.63319	2.12306e-05	9.15141e-05
ENSMUSG00000051611	258096	Olfr112	protein_coding	olfactory receptor 112 [Source:MGI Symbol;Acc:MGI:2177495]	-3.23019	-1.69162	-0.989237	-2.394	2.05905e-05	8.90324e-05
ENSMUSG00000030313	320560	Dennd5b	protein_coding	DENN/MADD domain containing 5B [Source:MGI Symbol;Acc:MGI:2444273]	-2.94014	-1.55588	-0.910342	-2.20143	2.03621e-05	8.81826e-05
ENSMUSG00000068735	277414	Trp53i11	protein_coding	transformation related protein 53 inducible protein 11 [Source:MGI Symbol;Acc:MGI:2670995]	-2.50335	-1.32386	-0.778053	-1.86966	1.85082e-05	8.071e-05
ENSMUSG00000020282	13650	Rhbdf1	protein_coding	rhomboid 5 homolog 1 [Source:MGI Symbol;Acc:MGI:104328]	-2.41601	-1.27263	-0.748603	-1.79665	1.81589e-05	7.93119e-05
ENSMUSG00000060568	226610	Fam78b	protein_coding	family with sequence similarity 78, member B [Source:MGI Symbol;Acc:MGI:2443050]	-3.59686	-1.84674	-1.0869	-2.60658	1.79502e-05	7.84994e-05
ENSMUSG00000031262	102920	Cenpi	protein_coding	centromere protein I [Source:MGI Symbol;Acc:MGI:2147897]	-2.05991	-1.04258	-0.616651	-1.4685	1.61064e-05	7.09977e-05
ENSMUSG00000041782	16763	Lad1	protein_coding	ladinin [Source:MGI Symbol;Acc:MGI:109343]	-2.5561	-1.35394	-0.801074	-1.90682	1.59914e-05	7.05356e-05
ENSMUSG00000031898	71854	Dpep3	protein_coding	dipeptidase 3 [Source:MGI Symbol;Acc:MGI:1919104]	-2.29043	-1.19562	-0.70745	-1.68379	1.59659e-05	7.04456e-05
ENSMUSG00000031434	75746	Morc4	protein_coding	microrchidia 4 [Source:MGI Symbol;Acc:MGI:1922996]	-4.21336	-2.07497	-1.22954	-2.9204	1.54602e-05	6.84986e-05
ENSMUSG00000039713	269608	Plekhg5	protein_coding	pleckstrin homology domain containing, family G (with RhoGef domain) member 5 [Source:MGI Symbol;Acc:MGI:2652860]	-2.51571	-1.33096	-0.78913	-1.8728	1.52626e-05	6.76879e-05
ENSMUSG00000052852	52250	Reep1	protein_coding	receptor accessory protein 1 [Source:MGI Symbol;Acc:MGI:1098827]	-2.25297	-1.17182	-0.694904	-1.64875	1.51996e-05	6.74517e-05
ENSMUSG00000027030	53416	Stk39	protein_coding	serine/threonine kinase 39 [Source:MGI Symbol;Acc:MGI:1858416]	-2.61191	-1.3851	-0.830032	-1.94018	1.19628e-05	5.4146e-05
ENSMUSG00000044433	69697	Camsap3	protein_coding	calmodulin regulated spectrin-associated protein family, member 3 [Source:MGI Symbol;Acc:MGI:1916947]	-2.76205	-1.46574	-0.886452	-2.04503	9.61464e-06	4.43023e-05
ENSMUSG00000055723	66922	Rras2	protein_coding	related RAS viral (r-ras) oncogene 2 [Source:MGI Symbol;Acc:MGI:1914172]	-2.25465	-1.17291	-0.71112	-1.63469	9.04751e-06	4.19406e-05
ENSMUSG00000049526	73893	Tmem202	protein_coding	transmembrane protein 202 [Source:MGI Symbol;Acc:MGI:1921143]	-5.80296	-2.53679	-1.5463	-3.52728	7.92095e-06	3.70788e-05
ENSMUSG00000079049	380839	Serpinb1c	protein_coding	serine (or cysteine) peptidase inhibitor, clade B, member 1c [Source:MGI Symbol;Acc:MGI:2445363]	-2.42831	-1.27995	-0.787111	-1.7728	6.32038e-06	3.00131e-05
ENSMUSG00000021186	23876	Fbln5	protein_coding	fibulin 5 [Source:MGI Symbol;Acc:MGI:1346091]	-11.5033	-3.52398	-2.18549	-4.86247	5.04871e-06	2.43848e-05
ENSMUSG00000050394	278097	Armcx6	protein_coding	armadillo repeat containing, X-linked 6 [Source:MGI Symbol;Acc:MGI:2147993]	-2.97198	-1.57143	-0.977357	-2.1655	4.67035e-06	2.2716e-05
ENSMUSG00000004709	18106	Cd244a	protein_coding	CD244 molecule A [Source:MGI Symbol;Acc:MGI:109294]	-2.23207	-1.15838	-0.723325	-1.59344	4.18572e-06	2.05249e-05
ENSMUSG00000057337	53374	Chst3	protein_coding	carbohydrate sulfotransferase 3 [Source:MGI Symbol;Acc:MGI:1858224]	-2.20939	-1.14365	-0.714683	-1.57262	4.09562e-06	2.01187e-05
ENSMUSG00000021707	13361	Dhfr	protein_coding	dihydrofolate reductase [Source:MGI Symbol;Acc:MGI:94890]	-2.02486	-1.01782	-0.636415	-1.39922	4.03025e-06	1.98329e-05
ENSMUSG00000036459	101543	Wtip	protein_coding	WT1-interacting protein [Source:MGI Symbol;Acc:MGI:2141920]	-2.07912	-1.05597	-0.661031	-1.45092	3.9022e-06	1.92438e-05
ENSMUSG00000017861	17865	Mybl2	protein_coding	myeloblastosis oncogene-like 2 [Source:MGI Symbol;Acc:MGI:101785]	-2.14962	-1.10408	-0.692158	-1.51601	3.74436e-06	1.85381e-05
ENSMUSG00000038204	117590	Asb10	protein_coding	ankyrin repeat and SOCS box-containing 10 [Source:MGI Symbol;Acc:MGI:2152836]	-7.61949	-2.9297	-1.85548	-4.00391	2.78495e-06	1.40754e-05
ENSMUSG00000054871	72309	Tmem158	protein_coding	transmembrane protein 158 [Source:MGI Symbol;Acc:MGI:1919559]	-2.35004	-1.23269	-0.78191	-1.68346	2.6597e-06	1.34966e-05
ENSMUSG00000040016	19218	Ptger3	protein_coding	prostaglandin E receptor 3 (subtype EP3) [Source:MGI Symbol;Acc:MGI:97795]	-3.05752	-1.61236	-1.02323	-2.2015	2.6225e-06	1.33323e-05
ENSMUSG00000038816	54366	Ctnnal1	protein_coding	catenin (cadherin associated protein), alpha-like 1 [Source:MGI Symbol;Acc:MGI:1859649]	-4.1025	-2.0365	-1.30388	-2.76913	2.00061e-06	1.03846e-05
ENSMUSG00000060275	100042150	Nrg2	protein_coding	neuregulin 2 [Source:MGI Symbol;Acc:MGI:1098246]	-2.44392	-1.2892	-0.836722	-1.74167	1.29088e-06	6.90799e-06
ENSMUSG00000030147	69810	Clec4b1	protein_coding	C-type lectin domain family 4, member b1 [Source:MGI Symbol;Acc:MGI:1917060]	-2.79563	-1.48317	-0.963583	-2.00276	1.24849e-06	6.7071e-06
ENSMUSG00000025279	13421	Dnase1l3	protein_coding	deoxyribonuclease 1-like 3 [Source:MGI Symbol;Acc:MGI:1314633]	-4.54521	-2.18435	-1.41971	-2.94898	1.23122e-06	6.62465e-06
ENSMUSG00000006344	23887	Ggt5	protein_coding	gamma-glutamyltransferase 5 [Source:MGI Symbol;Acc:MGI:1346063]	-2.51425	-1.33013	-0.865623	-1.79464	1.17937e-06	6.38292e-06
ENSMUSG00000099517	97908	Hist1h3g	protein_coding	histone cluster 1, H3g [Source:MGI Symbol;Acc:MGI:2145541]	-2.5815	-1.36821	-0.890812	-1.84561	1.1614e-06	6.29551e-06
ENSMUSG00000034842	109979	Art3	protein_coding	ADP-ribosyltransferase 3 [Source:MGI Symbol;Acc:MGI:1202729]	-3.37832	-1.75631	-1.14383	-2.36879	1.14997e-06	6.23597e-06
ENSMUSG00000029414	208628	Kntc1	protein_coding	kinetochore associated 1 [Source:MGI Symbol;Acc:MGI:2673709]	-2.17652	-1.12202	-0.731605	-1.51244	1.1046e-06	6.01829e-06
ENSMUSG00000040963	11890	Asgr2	protein_coding	asialoglycoprotein receptor 2 [Source:MGI Symbol;Acc:MGI:88082]	-3.99797	-1.99927	-1.31523	-2.6833	8.11795e-07	4.51912e-06
ENSMUSG00000037474	76843	Dtl	protein_coding	denticleless E3 ubiquitin protein ligase [Source:MGI Symbol;Acc:MGI:1924093]	-2.25518	-1.17324	-0.774211	-1.57228	7.27156e-07	4.0775e-06
ENSMUSG00000029581	14086	Fscn1	protein_coding	fascin actin-bundling protein 1 [Source:MGI Symbol;Acc:MGI:1352745]	-2.69454	-1.43004	-0.953266	-1.90682	5.00751e-07	2.88877e-06
ENSMUSG00000090894	258325	Olfr110	protein_coding	olfactory receptor 110 [Source:MGI Symbol;Acc:MGI:2177493]	-4.29524	-2.10274	-1.40601	-2.79946	4.45313e-07	2.58731e-06
ENSMUSG00000055069	270160	Rab39	protein_coding	RAB39, member RAS oncogene family [Source:MGI Symbol;Acc:MGI:2442855]	-2.03977	-1.02841	-0.689893	-1.36692	3.92644e-07	2.30356e-06
ENSMUSG00000000881	53310	Dlg3	protein_coding	discs large MAGUK scaffold protein 3 [Source:MGI Symbol;Acc:MGI:1888986]	-2.50699	-1.32596	-0.889537	-1.76238	3.9206e-07	2.302e-06
ENSMUSG00000004347	18575	Pde1c	protein_coding	phosphodiesterase 1C [Source:MGI Symbol;Acc:MGI:108413]	-7.17408	-2.84279	-1.90775	-3.77784	3.87118e-07	2.2779e-06
ENSMUSG00000091119	100039139	Ccdc152	protein_coding	coiled-coil domain containing 152 [Source:MGI Symbol;Acc:MGI:3641617]	-2.05142	-1.03662	-0.696066	-1.37718	3.78371e-07	2.22931e-06
ENSMUSG00000022548	11815	Apod	protein_coding	apolipoprotein D [Source:MGI Symbol;Acc:MGI:88056]	-4.15273	-2.05406	-1.38244	-2.72568	3.45419e-07	2.04647e-06
ENSMUSG00000021879	110083	Dnah12	protein_coding	dynein, axonemal, heavy chain 12 [Source:MGI Symbol;Acc:MGI:107720]	-8.53009	-3.09256	-2.08153	-4.10359	3.44472e-07	2.04173e-06
ENSMUSG00000032470	17532	Mras	protein_coding	muscle and microspikes RAS [Source:MGI Symbol;Acc:MGI:1100856]	-2.12366	-1.08655	-0.734326	-1.43878	2.92503e-07	1.74794e-06
ENSMUSG00000049985	77318	Ankrd55	protein_coding	ankyrin repeat domain 55 [Source:MGI Symbol;Acc:MGI:1924568]	-2.43659	-1.28486	-0.869345	-1.70038	2.79204e-07	1.67667e-06
ENSMUSG00000001763	232670	Tspan33	protein_coding	tetraspanin 33 [Source:MGI Symbol;Acc:MGI:1919012]	-8.11478	-3.02055	-2.04764	-3.99346	2.5819e-07	1.55634e-06
ENSMUSG00000075031	319178	Hist1h2bb	protein_coding	histone cluster 1, H2bb [Source:MGI Symbol;Acc:MGI:2448377]	-2.0355	-1.02538	-0.695233	-1.35553	2.56299e-07	1.54629e-06
ENSMUSG00000028031	56811	Dkk2	protein_coding	dickkopf WNT signaling pathway inhibitor 2 [Source:MGI Symbol;Acc:MGI:1890663]	-4.49485	-2.16827	-1.47137	-2.86517	2.47622e-07	1.49983e-06
ENSMUSG00000045287	237847	Rtn4rl1	protein_coding	reticulon 4 receptor-like 1 [Source:MGI Symbol;Acc:MGI:2661375]	-5.01173	-2.32531	-1.5789	-3.07172	2.41439e-07	1.46708e-06
ENSMUSG00000039748	26909	Exo1	protein_coding	exonuclease 1 [Source:MGI Symbol;Acc:MGI:1349427]	-2.74685	-1.45778	-0.990557	-1.925	2.34292e-07	1.42722e-06
ENSMUSG00000051220	236930	Ercc6l	protein_coding	excision repair cross-complementing rodent repair deficiency complementation group 6 like [Source:MGI Symbol;Acc:MGI:2654144]	-2.18611	-1.12837	-0.770865	-1.48587	1.86705e-07	1.15412e-06
ENSMUSG00000049709	244202	Nlrp10	protein_coding	NLR family, pyrin domain containing 10 [Source:MGI Symbol;Acc:MGI:2444084]	-2.83663	-1.50418	-1.0351	-1.97326	1.36091e-07	8.6364e-07
ENSMUSG00000089762	72500	Ier5l	protein_coding	immediate early response 5-like [Source:MGI Symbol;Acc:MGI:1919750]	-2.0047	-1.00338	-0.697882	-1.30888	8.36778e-08	5.48387e-07
ENSMUSG00000020185	52679	E2f7	protein_coding	E2F transcription factor 7 [Source:MGI Symbol;Acc:MGI:1289147]	-3.83756	-1.94019	-1.34953	-2.53085	8.34638e-08	5.47244e-07
ENSMUSG00000020961	108800	Ston2	protein_coding	stonin 2 [Source:MGI Symbol;Acc:MGI:1918272]	-2.11707	-1.08207	-0.753573	-1.41056	7.87904e-08	5.18569e-07
ENSMUSG00000031906	58994	Smpd3	protein_coding	sphingomyelin phosphodiesterase 3, neutral [Source:MGI Symbol;Acc:MGI:1927578]	-5.6435	-2.49659	-1.73938	-3.2538	7.72914e-08	5.10404e-07
ENSMUSG00000036330	110877	Slc18a1	protein_coding	solute carrier family 18 (vesicular monoamine), member 1 [Source:MGI Symbol;Acc:MGI:106684]	-2.7955	-1.48311	-1.03744	-1.92877	6.37912e-08	4.29878e-07
ENSMUSG00000026630	381319	Batf3	protein_coding	basic leucine zipper transcription factor, ATF-like 3 [Source:MGI Symbol;Acc:MGI:1925491]	-3.69444	-1.88536	-1.3265	-2.44422	4.79711e-08	3.31175e-07
ENSMUSG00000022747	54613	St3gal6	protein_coding	ST3 beta-galactoside alpha-2,3-sialyltransferase 6 [Source:MGI Symbol;Acc:MGI:1888707]	-2.42616	-1.27867	-0.900294	-1.65705	4.62818e-08	3.20955e-07
ENSMUSG00000030711	20887	Sult1a1	protein_coding	sulfotransferase family 1A, phenol-preferring, member 1 [Source:MGI Symbol;Acc:MGI:102896]	-2.71029	-1.43845	-1.01428	-1.86262	4.29925e-08	3.00212e-07
ENSMUSG00000029765	243743	Plxna4	protein_coding	plexin A4 [Source:MGI Symbol;Acc:MGI:2179061]	-2.93831	-1.55499	-1.09686	-2.01311	4.21788e-08	2.95166e-07
ENSMUSG00000038331	212712	Satb2	protein_coding	special AT-rich sequence binding protein 2 [Source:MGI Symbol;Acc:MGI:2679336]	-2.07702	-1.05452	-0.751638	-1.3574	2.45249e-08	1.78302e-07
ENSMUSG00000034353	51801	Ramp1	protein_coding	receptor (calcitonin) activity modifying protein 1 [Source:MGI Symbol;Acc:MGI:1858418]	-2.83679	-1.50426	-1.09141	-1.9171	9.03524e-09	6.99157e-08
ENSMUSG00000031398	18846	Plxna3	protein_coding	plexin A3 [Source:MGI Symbol;Acc:MGI:107683]	-2.24025	-1.16366	-0.844426	-1.48289	8.95177e-09	6.93085e-08
ENSMUSG00000040229	23890	Gpr34	protein_coding	G protein-coupled receptor 34 [Source:MGI Symbol;Acc:MGI:1346334]	-4.85902	-2.28066	-1.65566	-2.90567	8.74271e-09	6.78418e-08
ENSMUSG00000035283	11554	Adrb1	protein_coding	adrenergic receptor, beta 1 [Source:MGI Symbol;Acc:MGI:87937]	-8.11688	-3.02093	-2.19929	-3.84257	7.37852e-09	5.80706e-08
ENSMUSG00000063873	94249	Slc24a3	protein_coding	solute carrier family 24 (sodium/potassium/calcium exchanger), member 3 [Source:MGI Symbol;Acc:MGI:2137513]	-5.07169	-2.34247	-1.70571	-2.97923	7.28767e-09	5.74538e-08
ENSMUSG00000066510	330963	Ankdd1a	protein_coding	ankyrin repeat and death domain containing 1A [Source:MGI Symbol;Acc:MGI:2686319]	-4.26395	-2.09219	-1.52401	-2.66038	7.13262e-09	5.63278e-08
ENSMUSG00000021587	18548	Pcsk1	protein_coding	proprotein convertase subtilisin/kexin type 1 [Source:MGI Symbol;Acc:MGI:97511]	-7.23052	-2.8541	-2.08532	-3.62288	5.9284e-09	4.77171e-08
ENSMUSG00000070576	433938	Mn1	protein_coding	meningioma 1 [Source:MGI Symbol;Acc:MGI:1261813]	-4.33021	-2.11444	-1.54634	-2.68254	5.59538e-09	4.51417e-08
ENSMUSG00000018012	170758	Rac3	protein_coding	Rac family small GTPase 3 [Source:MGI Symbol;Acc:MGI:2180784]	-2.04521	-1.03225	-0.755949	-1.30855	5.13734e-09	4.14948e-08
ENSMUSG00000031137	14168	Fgf13	protein_coding	fibroblast growth factor 13 [Source:MGI Symbol;Acc:MGI:109178]	-20.1022	-4.32928	-3.17589	-5.48267	4.61571e-09	3.75447e-08
ENSMUSG00000050410	106795	Tcf19	protein_coding	transcription factor 19 [Source:MGI Symbol;Acc:MGI:103180]	-2.27272	-1.18442	-0.87028	-1.49856	4.16615e-09	3.42099e-08
ENSMUSG00000026077	18143	Npas2	protein_coding	neuronal PAS domain protein 2 [Source:MGI Symbol;Acc:MGI:109232]	-2.15866	-1.11014	-0.817606	-1.40266	3.58759e-09	2.97982e-08
ENSMUSG00000072437	332397	Nanos1	protein_coding	nanos C2HC-type zinc finger 1 [Source:MGI Symbol;Acc:MGI:2669254]	-2.51138	-1.32848	-0.979888	-1.67707	3.25442e-09	2.71916e-08
ENSMUSG00000027962	22329	Vcam1	protein_coding	vascular cell adhesion molecule 1 [Source:MGI Symbol;Acc:MGI:98926]	-3.14918	-1.65498	-1.22389	-2.08606	2.74443e-09	2.31685e-08
ENSMUSG00000041481	20715	Serpina3g	protein_coding	serine (or cysteine) peptidase inhibitor, clade A, member 3G [Source:MGI Symbol;Acc:MGI:105046]	-7.04435	-2.81647	-2.08808	-3.54485	2.32243e-09	1.99222e-08
ENSMUSG00000035455	60530	Fignl1	protein_coding	fidgetin-like 1 [Source:MGI Symbol;Acc:MGI:1890648]	-2.55622	-1.35401	-1.00575	-1.70228	2.04424e-09	1.76674e-08
ENSMUSG00000045903	225872	Npas4	protein_coding	neuronal PAS domain protein 4 [Source:MGI Symbol;Acc:MGI:2664186]	-30.0595	-4.90975	-3.65717	-6.16232	1.68717e-09	1.47753e-08
ENSMUSG00000090675	545205	Olfr111	protein_coding	olfactory receptor 111 [Source:MGI Symbol;Acc:MGI:2177494]	-3.74244	-1.90398	-1.43623	-2.37173	6.84271e-10	6.32916e-09
ENSMUSG00000096606	100503386	Tpbgl	protein_coding	trophoblast glycoprotein-like [Source:MGI Symbol;Acc:MGI:3646425]	-5.04889	-2.33597	-1.76429	-2.90764	6.23359e-10	5.82369e-09
ENSMUSG00000066363	238393	Serpina3f	protein_coding	serine (or cysteine) peptidase inhibitor, clade A, member 3F [Source:MGI Symbol;Acc:MGI:2182838]	-24.9931	-4.64346	-3.50716	-5.77975	6.22204e-10	5.81733e-09
ENSMUSG00000076431	20677	Sox4	protein_coding	SRY (sex determining region Y)-box 4 [Source:MGI Symbol;Acc:MGI:98366]	-4.50606	-2.17187	-1.6413	-2.70243	5.96791e-10	5.59866e-09
ENSMUSG00000015222	17756	Map2	protein_coding	microtubule-associated protein 2 [Source:MGI Symbol;Acc:MGI:97175]	-15.0316	-3.90992	-2.95541	-4.86443	5.87136e-10	5.51931e-09
ENSMUSG00000061991	319173	Hist1h2af	protein_coding	histone cluster 1, H2af [Source:MGI Symbol;Acc:MGI:2448309]	-3.20794	-1.68165	-1.27164	-2.09165	5.69007e-10	5.37081e-09
ENSMUSG00000022469	223864	Rapgef3	protein_coding	Rap guanine nucleotide exchange factor (GEF) 3 [Source:MGI Symbol;Acc:MGI:2441741]	-2.14476	-1.10082	-0.832949	-1.36868	5.42521e-10	5.13834e-09
ENSMUSG00000007080	18973	Pole	protein_coding	polymerase (DNA directed), epsilon [Source:MGI Symbol;Acc:MGI:1196391]	-2.65511	-1.40877	-1.07	-1.74755	4.06318e-10	3.90721e-09
ENSMUSG00000035448	12771	Ccr3	protein_coding	chemokine (C-C motif) receptor 3 [Source:MGI Symbol;Acc:MGI:104616]	-2.63577	-1.39822	-1.0637	-1.73274	3.58182e-10	3.46844e-09
ENSMUSG00000069310	319148	Hist1h3c	protein_coding	histone cluster 1, H3c [Source:MGI Symbol;Acc:MGI:2448320]	-3.0398	-1.60398	-1.22275	-1.98521	3.0445e-10	2.97943e-09
ENSMUSG00000049086	107771	Bmyc	protein_coding	brain expressed myelocytomatosis oncogene [Source:MGI Symbol;Acc:MGI:88184]	-5.30253	-2.40668	-1.83645	-2.97691	2.81727e-10	2.77671e-09
ENSMUSG00000059336	108052	Slc14a1	protein_coding	solute carrier family 14 (urea transporter), member 1 [Source:MGI Symbol;Acc:MGI:1351654]	-7.98816	-2.99786	-2.29569	-3.70003	2.11512e-10	2.12908e-09
ENSMUSG00000032841	72446	Prr5l	protein_coding	proline rich 5 like [Source:MGI Symbol;Acc:MGI:1919696]	-2.34011	-1.22657	-0.939598	-1.51355	2.05779e-10	2.0755e-09
ENSMUSG00000022240	18163	Ctnnd2	protein_coding	catenin (cadherin associated protein), delta 2 [Source:MGI Symbol;Acc:MGI:1195966]	-2.28239	-1.19055	-0.912031	-1.46906	2.05204e-10	2.07121e-09
ENSMUSG00000000247	16870	Lhx2	protein_coding	LIM homeobox protein 2 [Source:MGI Symbol;Acc:MGI:96785]	-3.31264	-1.72798	-1.32883	-2.12713	1.49223e-10	1.5476e-09
ENSMUSG00000035459	192188	Stab2	protein_coding	stabilin 2 [Source:MGI Symbol;Acc:MGI:2178743]	-3.3427	-1.74101	-1.34263	-2.1394	1.17582e-10	1.2453e-09
ENSMUSG00000020649	20135	Rrm2	protein_coding	ribonucleotide reductase M2 [Source:MGI Symbol;Acc:MGI:98181]	-2.4574	-1.29713	-1.0006	-1.59366	1.14729e-10	1.21663e-09
ENSMUSG00000037999	212285	Arap2	protein_coding	ArfGAP with RhoGAP domain, ankyrin repeat and PH domain 2 [Source:MGI Symbol;Acc:MGI:2684416]	-2.17813	-1.12309	-0.867817	-1.37836	9.91717e-11	1.07053e-09
ENSMUSG00000028832	16765	Stmn1	protein_coding	stathmin 1 [Source:MGI Symbol;Acc:MGI:96739]	-2.03926	-1.02805	-0.794774	-1.26132	9.4953e-11	1.03387e-09
ENSMUSG00000095217	319187	Hist1h2bn	protein_coding	histone cluster 1, H2bn [Source:MGI Symbol;Acc:MGI:2448407]	-2.60614	-1.38191	-1.06937	-1.69445	8.73252e-11	9.59883e-10
ENSMUSG00000024084	70536	Qpct	protein_coding	glutaminyl-peptide cyclotransferase (glutaminyl cyclase) [Source:MGI Symbol;Acc:MGI:1917786]	-2.13284	-1.09277	-0.848387	-1.33716	6.54906e-11	7.34472e-10
ENSMUSG00000037568	226841	Vash2	protein_coding	vasohibin 2 [Source:MGI Symbol;Acc:MGI:2444826]	-2.98007	-1.57535	-1.22314	-1.92756	6.50199e-11	7.29785e-10
ENSMUSG00000024421	16774	Lama3	protein_coding	laminin, alpha 3 [Source:MGI Symbol;Acc:MGI:99909]	-6.72989	-2.75058	-2.13708	-3.36409	6.11605e-11	6.88143e-10
ENSMUSG00000070858	381633	Gm1673	protein_coding	predicted gene 1673 [Source:MGI Symbol;Acc:MGI:2686519]	-2.61325	-1.38584	-1.08402	-1.68767	3.29659e-11	3.88291e-10
ENSMUSG00000049539	80838	Hist1h1a	protein_coding	histone cluster 1, H1a [Source:MGI Symbol;Acc:MGI:1931523]	-2.46369	-1.30082	-1.01892	-1.58272	2.89317e-11	3.43406e-10
ENSMUSG00000033207	71738	Mamdc2	protein_coding	MAM domain containing 2 [Source:MGI Symbol;Acc:MGI:1918988]	-2.96418	-1.56763	-1.2286	-1.90667	2.74401e-11	3.26823e-10
ENSMUSG00000040133	381413	Gpr176	protein_coding	G protein-coupled receptor 176 [Source:MGI Symbol;Acc:MGI:2685858]	-2.53732	-1.3433	-1.05441	-1.6322	2.36968e-11	2.84444e-10
ENSMUSG00000022303	75766	Dcstamp	protein_coding	dendrocyte expressed seven transmembrane protein [Source:MGI Symbol;Acc:MGI:1923016]	-9.79638	-3.29225	-2.5909	-3.9936	1.84381e-11	2.24636e-10
ENSMUSG00000016529	16153	Il10	protein_coding	interleukin 10 [Source:MGI Symbol;Acc:MGI:96537]	-3.59199	-1.84478	-1.45927	-2.2303	1.10625e-11	1.39328e-10
ENSMUSG00000025582	18164	Nptx1	protein_coding	neuronal pentraxin 1 [Source:MGI Symbol;Acc:MGI:107811]	-21.771	-4.44433	-3.52005	-5.36862	9.72176e-12	1.23787e-10
ENSMUSG00000021356	16364	Irf4	protein_coding	interferon regulatory factor 4 [Source:MGI Symbol;Acc:MGI:1096873]	-3.66294	-1.873	-1.48446	-2.26154	9.08159e-12	1.16386e-10
ENSMUSG00000023087	12457	Noct	protein_coding	nocturnin [Source:MGI Symbol;Acc:MGI:109382]	-2.07963	-1.05633	-0.837521	-1.27514	8.73383e-12	1.12137e-10
ENSMUSG00000055612	66953	Cdca7	protein_coding	cell division cycle associated 7 [Source:MGI Symbol;Acc:MGI:1914203]	-4.16414	-2.05802	-1.63598	-2.48006	6.66474e-12	8.71902e-11
ENSMUSG00000044708	16513	Kcnj10	protein_coding	potassium inwardly-rectifying channel, subfamily J, member 10 [Source:MGI Symbol;Acc:MGI:1194504]	-2.46586	-1.30209	-1.03523	-1.56896	6.55975e-12	8.60609e-11
ENSMUSG00000008734	64297	Gprc5b	protein_coding	G protein-coupled receptor, family C, group 5, member B [Source:MGI Symbol;Acc:MGI:1927596]	-2.22918	-1.15651	-0.919615	-1.39341	6.46277e-12	8.49498e-11
ENSMUSG00000044629	380686	Cnrip1	protein_coding	cannabinoid receptor interacting protein 1 [Source:MGI Symbol;Acc:MGI:1917505]	-2.00376	-1.00271	-0.797463	-1.20796	6.34262e-12	8.34498e-11
ENSMUSG00000069267	319150	Hist1h3b	protein_coding	histone cluster 1, H3b [Source:MGI Symbol;Acc:MGI:2448319]	-2.76063	-1.465	-1.16546	-1.76454	6.15343e-12	8.1115e-11
ENSMUSG00000002289	57875	Angptl4	protein_coding	angiopoietin-like 4 [Source:MGI Symbol;Acc:MGI:1888999]	-13.7546	-3.78184	-3.00907	-4.55461	6.05024e-12	7.98308e-11
ENSMUSG00000034751	328329	Mast4	protein_coding	microtubule associated serine/threonine kinase family member 4 [Source:MGI Symbol;Acc:MGI:1918885]	-2.33023	-1.22047	-0.973604	-1.46734	4.59431e-12	6.19891e-11
ENSMUSG00000063810	236266	Alms1	protein_coding	ALMS1, centrosome and basal body associated [Source:MGI Symbol;Acc:MGI:1934606]	-2.31993	-1.21408	-0.969194	-1.45897	4.25656e-12	5.77622e-11
ENSMUSG00000027955	68659	Fam198b	protein_coding	family with sequence similarity 198, member B [Source:MGI Symbol;Acc:MGI:1915909]	-2.10549	-1.07416	-0.857723	-1.2906	4.13589e-12	5.64572e-11
ENSMUSG00000027200	214968	Sema6d	protein_coding	sema domain, transmembrane domain (TM), and cytoplasmic domain, (semaphorin) 6D [Source:MGI Symbol;Acc:MGI:2387661]	-29.0563	-4.86078	-3.89092	-5.83064	3.16418e-12	4.37543e-11
ENSMUSG00000058773	56702	Hist1h1b	protein_coding	histone cluster 1, H1b [Source:MGI Symbol;Acc:MGI:1861461]	-2.91327	-1.54264	-1.23584	-1.84944	2.89449e-12	4.05522e-11
ENSMUSG00000026458	68507	Ppfia4	protein_coding	protein tyrosine phosphatase, receptor type, f polypeptide (PTPRF), interacting protein (liprin), alpha 4 [Source:MGI Symbol;Acc:MGI:1915757]	-2.00581	-1.00419	-0.806898	-1.20147	2.06794e-12	2.96633e-11
ENSMUSG00000022793	56375	B4galt4	protein_coding	UDP-Gal:betaGlcNAc beta 1,4-galactosyltransferase, polypeptide 4 [Source:MGI Symbol;Acc:MGI:1928387]	-2.64088	-1.40102	-1.1279	-1.67413	1.66758e-12	2.42985e-11
ENSMUSG00000037347	60322	Chst7	protein_coding	carbohydrate (N-acetylglucosamino) sulfotransferase 7 [Source:MGI Symbol;Acc:MGI:1891767]	-2.33857	-1.22563	-0.987251	-1.46401	1.5646e-12	2.30408e-11
ENSMUSG00000032254	71819	Kif23	protein_coding	kinesin family member 23 [Source:MGI Symbol;Acc:MGI:1919069]	-2.31028	-1.20807	-0.973254	-1.44288	1.53739e-12	2.27127e-11
ENSMUSG00000023909	76498	Paqr4	protein_coding	progestin and adipoQ receptor family member IV [Source:MGI Symbol;Acc:MGI:1923748]	-2.78415	-1.47724	-1.19015	-1.76433	1.53141e-12	2.26485e-11
ENSMUSG00000003418	241230	St8sia6	protein_coding	ST8 alpha-N-acetyl-neuraminide alpha-2,8-sialyltransferase 6 [Source:MGI Symbol;Acc:MGI:2386797]	-3.68362	-1.88112	-1.51708	-2.24517	1.36221e-12	2.02763e-11
ENSMUSG00000048142	269642	Nat8l	protein_coding	N-acetyltransferase 8-like [Source:MGI Symbol;Acc:MGI:2447776]	-3.37475	-1.75478	-1.42074	-2.08882	8.59288e-13	1.31586e-11
ENSMUSG00000071324	213402	Armc2	protein_coding	armadillo repeat containing 2 [Source:MGI Symbol;Acc:MGI:1916449]	-4.71212	-2.23637	-1.81569	-2.65706	6.15352e-13	9.55004e-12
ENSMUSG00000020042	74007	Btbd11	protein_coding	BTB (POZ) domain containing 11 [Source:MGI Symbol;Acc:MGI:1921257]	-6.15783	-2.62242	-2.13229	-3.11255	5.12952e-13	8.06214e-12
ENSMUSG00000022346	17869	Myc	protein_coding	myelocytomatosis oncogene [Source:MGI Symbol;Acc:MGI:97250]	-3.27889	-1.71321	-1.39975	-2.02667	2.80383e-13	4.62113e-12
ENSMUSG00000020654	104111	Adcy3	protein_coding	adenylate cyclase 3 [Source:MGI Symbol;Acc:MGI:99675]	-2.85035	-1.51114	-1.23499	-1.78729	2.70804e-13	4.49002e-12
ENSMUSG00000023066	246102	Rttn	protein_coding	rotatin [Source:MGI Symbol;Acc:MGI:2179288]	-2.21218	-1.14547	-0.936508	-1.35443	2.57525e-13	4.3008e-12
ENSMUSG00000063450	319565	Syne2	protein_coding	spectrin repeat containing, nuclear envelope 2 [Source:MGI Symbol;Acc:MGI:2449316]	-2.09542	-1.06724	-0.875427	-1.25905	1.68019e-13	2.88258e-12
ENSMUSG00000003484	72054	Cyp4f18	protein_coding	cytochrome P450, family 4, subfamily f, polypeptide 18 [Source:MGI Symbol;Acc:MGI:1919304]	-2.64375	-1.40259	-1.15184	-1.65333	1.44143e-13	2.50073e-12
ENSMUSG00000004633	69993	Chn2	protein_coding	chimerin 2 [Source:MGI Symbol;Acc:MGI:1917243]	-3.56994	-1.8359	-1.50993	-2.16187	1.18295e-13	2.10225e-12
ENSMUSG00000031778	20312	Cx3cl1	protein_coding	chemokine (C-X3-C motif) ligand 1 [Source:MGI Symbol;Acc:MGI:1097153]	-3.92533	-1.97281	-1.6246	-2.32102	9.96588e-14	1.79204e-12
ENSMUSG00000051212	321019	Gpr183	protein_coding	G protein-coupled receptor 183 [Source:MGI Symbol;Acc:MGI:2442034]	-3.58448	-1.84176	-1.51715	-2.16637	9.55641e-14	1.7229e-12
ENSMUSG00000049119	242297	Fam110b	protein_coding	family with sequence similarity 110, member B [Source:MGI Symbol;Acc:MGI:1916593]	-2.22524	-1.15396	-0.951113	-1.3568	8.84673e-14	1.60541e-12
ENSMUSG00000004698	79221	Hdac9	protein_coding	histone deacetylase 9 [Source:MGI Symbol;Acc:MGI:1931221]	-2.65839	-1.41055	-1.16667	-1.65443	5.46236e-14	1.02627e-12
ENSMUSG00000029417	17329	Cxcl9	protein_coding	chemokine (C-X-C motif) ligand 9 [Source:MGI Symbol;Acc:MGI:1352449]	-13.1629	-3.7184	-3.07624	-4.36056	5.28102e-14	9.94903e-13
ENSMUSG00000066687	235320	Zbtb16	protein_coding	zinc finger and BTB domain containing 16 [Source:MGI Symbol;Acc:MGI:103222]	-4.97999	-2.31614	-1.91907	-2.71321	4.25992e-14	8.14747e-13
ENSMUSG00000060098	214572	Prmt7	protein_coding	protein arginine N-methyltransferase 7 [Source:MGI Symbol;Acc:MGI:2384879]	-2.0357	-1.02552	-0.850473	-1.20057	3.75056e-14	7.25354e-13
ENSMUSG00000027765	18441	P2ry1	protein_coding	purinergic receptor P2Y, G-protein coupled 1 [Source:MGI Symbol;Acc:MGI:105049]	-3.33625	-1.73823	-1.44165	-2.03481	3.7035e-14	7.17256e-13
ENSMUSG00000027318	110751	Adam33	protein_coding	a disintegrin and metallopeptidase domain 33 [Source:MGI Symbol;Acc:MGI:1341813]	-2.34888	-1.23198	-1.02229	-1.44166	3.44384e-14	6.69472e-13
ENSMUSG00000001228	18140	Uhrf1	protein_coding	ubiquitin-like, containing PHD and RING finger domains, 1 [Source:MGI Symbol;Acc:MGI:1338889]	-2.55253	-1.35193	-1.12255	-1.5813	3.13903e-14	6.14823e-13
ENSMUSG00000042842	20708	Serpinb6b	protein_coding	serine (or cysteine) peptidase inhibitor, clade B, member 6b [Source:MGI Symbol;Acc:MGI:894688]	-2.57555	-1.36488	-1.13593	-1.59383	2.24392e-14	4.50348e-13
ENSMUSG00000035064	13631	Eef2k	protein_coding	eukaryotic elongation factor-2 kinase [Source:MGI Symbol;Acc:MGI:1195261]	-2.57237	-1.3631	-1.13538	-1.59081	1.98548e-14	4.03753e-13
ENSMUSG00000033949	28105	Trim36	protein_coding	tripartite motif-containing 36 [Source:MGI Symbol;Acc:MGI:106264]	-2.36968	-1.24469	-1.03705	-1.45234	1.90582e-14	3.88697e-13
ENSMUSG00000047875	269604	Gpr157	protein_coding	G protein-coupled receptor 157 [Source:MGI Symbol;Acc:MGI:2442046]	-2.22712	-1.15518	-0.962767	-1.34759	1.81958e-14	3.73311e-13
ENSMUSG00000022494	72555	Shisa9	protein_coding	shisa family member 9 [Source:MGI Symbol;Acc:MGI:1919805]	-12.9151	-3.69099	-3.07638	-4.3056	1.80408e-14	3.70682e-13
ENSMUSG00000030737	101488	Slco2b1	protein_coding	solute carrier organic anion transporter family, member 2b1 [Source:MGI Symbol;Acc:MGI:1351872]	-8.23854	-3.04239	-2.5362	-3.54858	1.76014e-14	3.6233e-13
ENSMUSG00000039304	22035	Tnfsf10	protein_coding	tumor necrosis factor (ligand) superfamily, member 10 [Source:MGI Symbol;Acc:MGI:107414]	-2.19826	-1.13636	-0.947671	-1.32505	1.65939e-14	3.46323e-13
ENSMUSG00000027199	67092	Gatm	protein_coding	glycine amidinotransferase (L-arginine:glycine amidinotransferase) [Source:MGI Symbol;Acc:MGI:1914342]	-2.94242	-1.557	-1.2985	-1.81551	1.65269e-14	3.4574e-13
ENSMUSG00000024534	67847	Sncaip	protein_coding	synuclein, alpha interacting protein (synphilin) [Source:MGI Symbol;Acc:MGI:1915097]	-6.43177	-2.68522	-2.24085	-3.12958	1.50003e-14	3.17649e-13
ENSMUSG00000005672	16590	Kit	protein_coding	KIT proto-oncogene receptor tyrosine kinase [Source:MGI Symbol;Acc:MGI:96677]	-6.31369	-2.65848	-2.22239	-3.09457	1.15435e-14	2.47862e-13
ENSMUSG00000039899	14190	Fgl2	protein_coding	fibrinogen-like protein 2 [Source:MGI Symbol;Acc:MGI:103266]	-2.04634	-1.03305	-0.863651	-1.20245	1.14203e-14	2.45599e-13
ENSMUSG00000034959	271221	Rubcnl	protein_coding	RUN and cysteine rich domain containing beclin 1 interacting protein like [Source:MGI Symbol;Acc:MGI:2685590]	-2.02456	-1.01761	-0.852418	-1.18279	8.4422e-15	1.86484e-13
ENSMUSG00000027368	13537	Dusp2	protein_coding	dual specificity phosphatase 2 [Source:MGI Symbol;Acc:MGI:101911]	-3.03426	-1.60134	-1.34223	-1.86046	7.66911e-15	1.6995e-13
ENSMUSG00000040950	216864	Mgl2	protein_coding	macrophage galactose N-acetyl-galactosamine specific lectin 2 [Source:MGI Symbol;Acc:MGI:2385729]	-4.11269	-2.04008	-1.70999	-2.37017	7.65552e-15	1.69921e-13
ENSMUSG00000011256	11492	Adam19	protein_coding	a disintegrin and metallopeptidase domain 19 (meltrin beta) [Source:MGI Symbol;Acc:MGI:105377]	-3.52275	-1.8167	-1.52597	-2.10743	5.49959e-15	1.26536e-13
ENSMUSG00000021087	104001	Rtn1	protein_coding	reticulon 1 [Source:MGI Symbol;Acc:MGI:1933947]	-2.29973	-1.20147	-1.00925	-1.39368	5.45416e-15	1.257e-13
ENSMUSG00000039908	268512	Slc26a11	protein_coding	solute carrier family 26, member 11 [Source:MGI Symbol;Acc:MGI:2444589]	-2.02748	-1.01969	-0.857577	-1.18181	4.51171e-15	1.05732e-13
ENSMUSG00000030789	16411	Itgax	protein_coding	integrin alpha X [Source:MGI Symbol;Acc:MGI:96609]	-4.29948	-2.10416	-1.76962	-2.43871	4.51891e-15	1.05732e-13
ENSMUSG00000043008	239743	Klhl6	protein_coding	kelch-like 6 [Source:MGI Symbol;Acc:MGI:2686922]	-2.05209	-1.0371	-0.872807	-1.20139	4.04653e-15	9.54871e-14
ENSMUSG00000005410	17218	Mcm5	protein_coding	minichromosome maintenance complex component 5 [Source:MGI Symbol;Acc:MGI:103197]	-2.62801	-1.39397	-1.17639	-1.61155	2.58425e-15	6.32478e-14
ENSMUSG00000004891	18008	Nes	protein_coding	nestin [Source:MGI Symbol;Acc:MGI:101784]	-6.07213	-2.6022	-2.1995	-3.0049	1.99071e-15	4.93326e-14
ENSMUSG00000029650	71706	Slc46a3	protein_coding	solute carrier family 46, member 3 [Source:MGI Symbol;Acc:MGI:1918956]	-2.06857	-1.04863	-0.887735	-1.20953	1.53362e-15	3.86987e-14
ENSMUSG00000029648	14254	Flt1	protein_coding	FMS-like tyrosine kinase 1 [Source:MGI Symbol;Acc:MGI:95558]	-4.97239	-2.31394	-1.95963	-2.66825	1.4397e-15	3.65958e-14
ENSMUSG00000033174	23945	Mgll	protein_coding	monoglyceride lipase [Source:MGI Symbol;Acc:MGI:1346042]	-4.07802	-2.02787	-1.72194	-2.33379	9.12466e-16	2.38067e-14
ENSMUSG00000037972	20621	Snn	protein_coding	stannin [Source:MGI Symbol;Acc:MGI:1276549]	-3.39931	-1.76524	-1.49967	-2.03081	8.37934e-16	2.20704e-14
ENSMUSG00000037224	231125	Zfyve28	protein_coding	zinc finger, FYVE domain containing 28 [Source:MGI Symbol;Acc:MGI:2684992]	-3.22856	-1.69089	-1.44076	-1.94102	4.98133e-16	1.37764e-14
ENSMUSG00000000489	18591	Pdgfb	protein_coding	platelet derived growth factor, B polypeptide [Source:MGI Symbol;Acc:MGI:97528]	-2.01544	-1.0111	-0.861724	-1.16047	4.78211e-16	1.33053e-14
ENSMUSG00000002870	17216	Mcm2	protein_coding	minichromosome maintenance complex component 2 [Source:MGI Symbol;Acc:MGI:105380]	-2.19205	-1.13228	-0.965954	-1.29861	4.00863e-16	1.13822e-14
ENSMUSG00000041762	68526	Gpr155	protein_coding	G protein-coupled receptor 155 [Source:MGI Symbol;Acc:MGI:1915776]	-3.19608	-1.6763	-1.43041	-1.9222	3.83803e-16	1.09202e-14
ENSMUSG00000019966	17311	Kitl	protein_coding	kit ligand [Source:MGI Symbol;Acc:MGI:96974]	-2.91534	-1.54367	-1.31798	-1.76935	3.46125e-16	9.95057e-15
ENSMUSG00000021200	65256	Asb2	protein_coding	ankyrin repeat and SOCS box-containing 2 [Source:MGI Symbol;Acc:MGI:1929743]	-3.84459	-1.94283	-1.66157	-2.22409	2.54701e-16	7.52566e-15
ENSMUSG00000017652	21939	Cd40	protein_coding	CD40 antigen [Source:MGI Symbol;Acc:MGI:88336]	-2.10361	-1.07287	-0.919185	-1.22655	1.83104e-16	5.58931e-15
ENSMUSG00000034858	235493	Fam214a	protein_coding	family with sequence similarity 214, member A [Source:MGI Symbol;Acc:MGI:2387648]	-3.28343	-1.7152	-1.47225	-1.95816	1.28993e-16	4.08173e-15
ENSMUSG00000032035	23871	Ets1	protein_coding	E26 avian leukemia oncogene 1, 5' domain [Source:MGI Symbol;Acc:MGI:95455]	-3.96221	-1.98631	-1.70606	-2.26656	1.13976e-16	3.65676e-15
ENSMUSG00000057706	108797	Mex3b	protein_coding	mex3 RNA binding family member B [Source:MGI Symbol;Acc:MGI:1918252]	-2.78934	-1.47992	-1.274	-1.68585	7.36642e-17	2.48446e-15
ENSMUSG00000040537	11496	Adam22	protein_coding	a disintegrin and metallopeptidase domain 22 [Source:MGI Symbol;Acc:MGI:1340046]	-3.03458	-1.6015	-1.38061	-1.82239	5.5767e-17	1.92787e-15
ENSMUSG00000016756	12763	Cmah	protein_coding	cytidine monophospho-N-acetylneuraminic acid hydroxylase [Source:MGI Symbol;Acc:MGI:103227]	-13.8731	-3.79422	-3.27457	-4.31388	4.46541e-17	1.56323e-15
ENSMUSG00000032589	12217	Bsn	protein_coding	bassoon [Source:MGI Symbol;Acc:MGI:1277955]	-2.10805	-1.07591	-0.928617	-1.22319	4.40162e-17	1.54481e-15
ENSMUSG00000021838	74480	Samd4	protein_coding	sterile alpha motif domain containing 4 [Source:MGI Symbol;Acc:MGI:1921730]	-5.66741	-2.50269	-2.16753	-2.83785	2.18998e-17	8.18461e-16
ENSMUSG00000018459	114644	Slc13a3	protein_coding	solute carrier family 13 (sodium-dependent dicarboxylate transporter), member 3 [Source:MGI Symbol;Acc:MGI:2149635]	-2.61062	-1.38439	-1.19934	-1.56945	2.06462e-17	7.75804e-16
ENSMUSG00000024013	26382	Fgd2	protein_coding	FYVE, RhoGEF and PH domain containing 2 [Source:MGI Symbol;Acc:MGI:1347084]	-2.34643	-1.23047	-1.0664	-1.39454	1.90627e-17	7.24173e-16
ENSMUSG00000074141	100328588	Il4i1	protein_coding	interleukin 4 induced 1 [Source:MGI Symbol;Acc:MGI:109552]	-2.7488	-1.4588	-1.26615	-1.65145	1.40136e-17	5.44325e-16
ENSMUSG00000027358	12156	Bmp2	protein_coding	bone morphogenetic protein 2 [Source:MGI Symbol;Acc:MGI:88177]	-3.1936	-1.67518	-1.45496	-1.89541	1.21216e-17	4.78908e-16
ENSMUSG00000022504	12265	Ciita	protein_coding	class II transactivator [Source:MGI Symbol;Acc:MGI:108445]	-3.32806	-1.73468	-1.50677	-1.96259	1.18931e-17	4.71226e-16
ENSMUSG00000034656	12286	Cacna1a	protein_coding	calcium channel, voltage-dependent, P/Q type, alpha 1A subunit [Source:MGI Symbol;Acc:MGI:109482]	-2.08629	-1.06094	-0.92305	-1.19883	8.4004e-18	3.46748e-16
ENSMUSG00000030649	75430	Anapc15	protein_coding	anaphase prompoting complex C subunit 15 [Source:MGI Symbol;Acc:MGI:1922680]	-2.85411	-1.51304	-1.31794	-1.70815	6.52232e-18	2.73305e-16
ENSMUSG00000034522	380912	Zfp395	protein_coding	zinc finger protein 395 [Source:MGI Symbol;Acc:MGI:2682318]	-2.18426	-1.12715	-0.9827	-1.2716	5.34421e-18	2.28792e-16
ENSMUSG00000018341	16162	Il12rb2	protein_coding	interleukin 12 receptor, beta 2 [Source:MGI Symbol;Acc:MGI:1270861]	-3.47791	-1.79822	-1.56793	-2.02851	5.22862e-18	2.24538e-16
ENSMUSG00000038151	12142	Prdm1	protein_coding	PR domain containing 1, with ZNF domain [Source:MGI Symbol;Acc:MGI:99655]	-2.02745	-1.01967	-0.889294	-1.15004	4.96277e-18	2.15126e-16
ENSMUSG00000056758	15364	Hmga2	protein_coding	high mobility group AT-hook 2 [Source:MGI Symbol;Acc:MGI:101761]	-2.69352	-1.42949	-1.24679	-1.61219	4.89924e-18	2.1304e-16
ENSMUSG00000034957	12606	Cebpa	protein_coding	CCAAT/enhancer binding protein (C/EBP), alpha [Source:MGI Symbol;Acc:MGI:99480]	-2.06669	-1.04732	-0.913598	-1.18105	4.74692e-18	2.07067e-16
ENSMUSG00000000318	17312	Clec10a	protein_coding	C-type lectin domain family 10, member A [Source:MGI Symbol;Acc:MGI:96975]	-3.67454	-1.87756	-1.64576	-2.10937	1.59731e-18	7.86034e-17
ENSMUSG00000040855	194590	Reps2	protein_coding	RALBP1 associated Eps domain containing protein 2 [Source:MGI Symbol;Acc:MGI:2663511]	-2.33542	-1.22368	-1.07304	-1.37433	1.45456e-18	7.31407e-17
ENSMUSG00000019302	11975	Atp6v0a1	protein_coding	ATPase, H+ transporting, lysosomal V0 subunit A1 [Source:MGI Symbol;Acc:MGI:103286]	-2.09724	-1.06849	-0.93768	-1.19931	1.21596e-18	6.18172e-17
ENSMUSG00000064373	20363	Selenop	protein_coding	selenoprotein P [Source:MGI Symbol;Acc:MGI:894288]	-2.12954	-1.09054	-0.957179	-1.2239	1.17174e-18	6.00106e-17
ENSMUSG00000015854	11801	Cd5l	protein_coding	CD5 antigen-like [Source:MGI Symbol;Acc:MGI:1334419]	-4.32226	-2.11179	-1.85419	-2.36939	1.07923e-18	5.58937e-17
ENSMUSG00000046031	215900	Calhm6	protein_coding	calcium homeostasis modulator family member 6 [Source:MGI Symbol;Acc:MGI:2443082]	-2.65475	-1.40858	-1.23727	-1.57988	9.78722e-19	5.10708e-17
ENSMUSG00000074607	269389	Tox2	protein_coding	TOX high mobility group box family member 2 [Source:MGI Symbol;Acc:MGI:3611233]	-17.3949	-4.12059	-3.62402	-4.61717	7.26216e-19	3.90744e-17
ENSMUSG00000045875	11549	Adra1a	protein_coding	adrenergic receptor, alpha 1a [Source:MGI Symbol;Acc:MGI:104773]	-2.70996	-1.43827	-1.26588	-1.61067	6.08793e-19	3.30133e-17
ENSMUSG00000051043	70355	Gprc5c	protein_coding	G protein-coupled receptor, family C, group 5, member C [Source:MGI Symbol;Acc:MGI:1917605]	-6.19326	-2.6307	-2.31894	-2.94246	4.19434e-19	2.33868e-17
ENSMUSG00000026355	17219	Mcm6	protein_coding	minichromosome maintenance complex component 6 [Source:MGI Symbol;Acc:MGI:1298227]	-2.04168	-1.02976	-0.909159	-1.15035	2.84277e-19	1.64476e-17
ENSMUSG00000018339	14778	Gpx3	protein_coding	glutathione peroxidase 3 [Source:MGI Symbol;Acc:MGI:105102]	-2.39047	-1.2573	-1.11115	-1.40344	2.22045e-19	1.35838e-17
ENSMUSG00000041797	217262	Abca9	protein_coding	ATP-binding cassette, sub-family A (ABC1), member 9 [Source:MGI Symbol;Acc:MGI:2386796]	-2.12669	-1.08861	-0.963644	-1.21358	1.47128e-19	9.50698e-18
ENSMUSG00000059994	229499	Fcrl1	protein_coding	Fc receptor-like 1 [Source:MGI Symbol;Acc:MGI:2442862]	-3.32451	-1.73314	-1.53427	-1.93202	1.45094e-19	9.41955e-18
ENSMUSG00000036853	171166	Mcoln3	protein_coding	mucolipin 3 [Source:MGI Symbol;Acc:MGI:1890500]	-2.16976	-1.11754	-0.990897	-1.24418	9.59312e-20	6.53466e-18
ENSMUSG00000041552	211612	Ptchd1	protein_coding	patched domain containing 1 [Source:MGI Symbol;Acc:MGI:2685233]	-7.08746	-2.82527	-2.50641	-3.14413	8.381e-20	5.85315e-18
ENSMUSG00000040209	170753	Zfp704	protein_coding	zinc finger protein 704 [Source:MGI Symbol;Acc:MGI:2180715]	-2.16906	-1.11707	-0.99175	-1.2424	6.87576e-20	4.8758e-18
ENSMUSG00000000440	19016	Pparg	protein_coding	peroxisome proliferator activated receptor gamma [Source:MGI Symbol;Acc:MGI:97747]	-6.0393	-2.59438	-2.30356	-2.88521	6.69323e-20	4.80269e-18
ENSMUSG00000001270	12709	Ckb	protein_coding	creatine kinase, brain [Source:MGI Symbol;Acc:MGI:88407]	-2.33873	-1.22573	-1.08976	-1.3617	4.72552e-20	3.49436e-18
ENSMUSG00000038370	66425	Pcp4l1	protein_coding	Purkinje cell protein 4-like 1 [Source:MGI Symbol;Acc:MGI:1913675]	-5.10483	-2.35186	-2.09575	-2.60798	2.55315e-20	2.02902e-18
ENSMUSG00000033857	217364	Engase	protein_coding	endo-beta-N-acetylglucosaminidase [Source:MGI Symbol;Acc:MGI:2443788]	-3.70825	-1.89074	-1.68612	-2.09536	2.07291e-20	1.69611e-18
ENSMUSG00000032076	54725	Cadm1	protein_coding	cell adhesion molecule 1 [Source:MGI Symbol;Acc:MGI:1889272]	-2.13624	-1.09508	-0.977255	-1.2129	1.70528e-20	1.47195e-18
ENSMUSG00000008305	21885	Tle1	protein_coding	transducin-like enhancer of split 1 [Source:MGI Symbol;Acc:MGI:104636]	-3.87385	-1.95377	-1.74376	-2.16378	1.65239e-20	1.43706e-18
ENSMUSG00000031613	15446	Hpgd	protein_coding	hydroxyprostaglandin dehydrogenase 15 (NAD) [Source:MGI Symbol;Acc:MGI:108085]	-7.48812	-2.9046	-2.59283	-3.21638	1.57602e-20	1.37931e-18
ENSMUSG00000006800	72043	Sulf2	protein_coding	sulfatase 2 [Source:MGI Symbol;Acc:MGI:1919293]	-3.76877	-1.9141	-1.71134	-2.11685	1.01193e-20	9.32866e-19
ENSMUSG00000029810	65963	Tmem176b	protein_coding	transmembrane protein 176B [Source:MGI Symbol;Acc:MGI:1916348]	-2.05366	-1.03819	-0.928927	-1.14746	8.14986e-21	7.71892e-19
ENSMUSG00000023367	66058	Tmem176a	protein_coding	transmembrane protein 176A [Source:MGI Symbol;Acc:MGI:1913308]	-2.22947	-1.1567	-1.03627	-1.27713	5.6691e-21	5.59945e-19
ENSMUSG00000024610	16149	Cd74	protein_coding	CD74 antigen (invariant polypeptide of major histocompatibility complex, class II antigen-associated) [Source:MGI Symbol;Acc:MGI:96534]	-2.54323	-1.34666	-1.21273	-1.48058	1.20412e-21	1.46058e-19
ENSMUSG00000070348	12443	Ccnd1	protein_coding	cyclin D1 [Source:MGI Symbol;Acc:MGI:88313]	-4.99743	-2.32119	-2.09178	-2.55059	9.73951e-22	1.19184e-19
ENSMUSG00000032741	252972	Tpcn1	protein_coding	two pore channel 1 [Source:MGI Symbol;Acc:MGI:2182472]	-2.19145	-1.13189	-1.02029	-1.24348	8.97829e-22	1.1085e-19
ENSMUSG00000034855	15945	Cxcl10	protein_coding	chemokine (C-X-C motif) ligand 10 [Source:MGI Symbol;Acc:MGI:1352450]	-3.5498	-1.82774	-1.64777	-2.00771	8.59382e-22	1.08032e-19
ENSMUSG00000000732	50723	Icosl	protein_coding	icos ligand [Source:MGI Symbol;Acc:MGI:1354701]	-2.57844	-1.3665	-1.23282	-1.50018	6.88877e-22	8.82017e-20
ENSMUSG00000045322	81897	Tlr9	protein_coding	toll-like receptor 9 [Source:MGI Symbol;Acc:MGI:1932389]	-2.3406	-1.22688	-1.10705	-1.34671	6.53035e-22	8.43941e-20
ENSMUSG00000036526	108723	Card11	protein_coding	caspase recruitment domain family, member 11 [Source:MGI Symbol;Acc:MGI:1916978]	-4.2794	-2.09741	-1.89455	-2.30026	4.67174e-22	6.33342e-20
ENSMUSG00000030208	13730	Emp1	protein_coding	epithelial membrane protein 1 [Source:MGI Symbol;Acc:MGI:107941]	-2.57113	-1.3624	-1.23116	-1.49365	4.08033e-22	5.87738e-20
ENSMUSG00000039115	104099	Itga9	protein_coding	integrin alpha 9 [Source:MGI Symbol;Acc:MGI:104756]	-2.9099	-1.54097	-1.39346	-1.68847	3.28368e-22	4.83051e-20
ENSMUSG00000028207	65973	Asph	protein_coding	aspartate-beta-hydroxylase [Source:MGI Symbol;Acc:MGI:1914186]	-2.25069	-1.17037	-1.06064	-1.2801	1.61767e-22	2.60106e-20
ENSMUSG00000073421	14961	H2-Ab1	protein_coding	histocompatibility 2, class II antigen A, beta 1 [Source:MGI Symbol;Acc:MGI:103070]	-2.70792	-1.43719	-1.30287	-1.5715	1.45094e-22	2.38607e-20
ENSMUSG00000025993	53945	Slc40a1	protein_coding	solute carrier family 40 (iron-regulated transporter), member 1 [Source:MGI Symbol;Acc:MGI:1315204]	-2.47175	-1.30553	-1.18531	-1.42575	8.73147e-23	1.56803e-20
ENSMUSG00000003134	54610	Tbc1d8	protein_coding	TBC1 domain family, member 8 [Source:MGI Symbol;Acc:MGI:1927225]	-2.28477	-1.19205	-1.08247	-1.30163	8.23728e-23	1.51861e-20
ENSMUSG00000038068	218215	Rnf144b	protein_coding	ring finger protein 144B [Source:MGI Symbol;Acc:MGI:2384986]	-3.63195	-1.86075	-1.69182	-2.02967	5.36016e-23	1.02945e-20
ENSMUSG00000032046	76192	Abhd12	protein_coding	abhydrolase domain containing 12 [Source:MGI Symbol;Acc:MGI:1923442]	-2.04436	-1.03165	-0.938257	-1.12505	4.86791e-23	9.61621e-21
ENSMUSG00000020658	668212	Efr3b	protein_coding	EFR3 homolog B [Source:MGI Symbol;Acc:MGI:2444851]	-9.30392	-3.21784	-2.9301	-3.50558	3.18404e-23	6.57148e-21
ENSMUSG00000028238	242341	Atp6v0d2	protein_coding	ATPase, H+ transporting, lysosomal V0 subunit D2 [Source:MGI Symbol;Acc:MGI:1924415]	-3.93254	-1.97546	-1.79924	-2.15168	2.93215e-23	6.1433e-21
ENSMUSG00000026170	104086	Cyp27a1	protein_coding	cytochrome P450, family 27, subfamily a, polypeptide 1 [Source:MGI Symbol;Acc:MGI:88594]	-2.32986	-1.22025	-1.112	-1.3285	2.42218e-23	5.23342e-21
ENSMUSG00000038332	140742	Sesn1	protein_coding	sestrin 1 [Source:MGI Symbol;Acc:MGI:2155278]	-2.75967	-1.46449	-1.33496	-1.59402	2.18427e-23	4.87162e-21
ENSMUSG00000021756	16195	Il6st	protein_coding	interleukin 6 signal transducer [Source:MGI Symbol;Acc:MGI:96560]	-2.11031	-1.07745	-0.983558	-1.17135	1.31029e-23	3.1239e-21
ENSMUSG00000096210	14958	H1f0	protein_coding	H1 histone family, member 0 [Source:MGI Symbol;Acc:MGI:95893]	-2.28577	-1.19268	-1.08912	-1.29623	1.15401e-23	2.84958e-21
ENSMUSG00000034652	217303	Cd300a	protein_coding	CD300A molecule [Source:MGI Symbol;Acc:MGI:2443411]	-2.2674	-1.18104	-1.07868	-1.2834	1.08397e-23	2.7253e-21
ENSMUSG00000071042	240168	Rasgrp3	protein_coding	RAS, guanyl releasing protein 3 [Source:MGI Symbol;Acc:MGI:3028579]	-4.54781	-2.18517	-2.00865	-2.3617	9.44356e-25	3.26464e-22
ENSMUSG00000036594	14960	H2-Aa	protein_coding	histocompatibility 2, class II antigen A, alpha [Source:MGI Symbol;Acc:MGI:95895]	-3.77833	-1.91775	-1.7668	-2.0687	3.81288e-25	1.71121e-22
ENSMUSG00000060586	14969	H2-Eb1	protein_coding	histocompatibility 2, class II antigen E beta [Source:MGI Symbol;Acc:MGI:95901]	-3.46058	-1.79102	-1.65119	-1.93084	2.8675e-25	1.36731e-22
ENSMUSG00000022272	17909	Myo10	protein_coding	myosin X [Source:MGI Symbol;Acc:MGI:107716]	-2.17619	-1.1218	-1.03658	-1.20702	1.10199e-25	6.92652e-23
ENSMUSG00000032220	71602	Myo1e	protein_coding	myosin IE [Source:MGI Symbol;Acc:MGI:106621]	-2.34172	-1.22757	-1.13668	-1.31846	4.47337e-26	3.25567e-23
ENSMUSG00000039735	214459	Fnbp1l	protein_coding	formin binding protein 1-like [Source:MGI Symbol;Acc:MGI:1925642]	-2.74356	-1.45605	-1.34869	-1.5634	3.85696e-26	2.963e-23
ENSMUSG00000015568	16956	Lpl	protein_coding	lipoprotein lipase [Source:MGI Symbol;Acc:MGI:96820]	-9.43212	-3.23758	-3.04768	-3.42748	1.15307e-29	3.18893e-26
ENSMUSG00000015396	12522	Cd83	protein_coding	CD83 antigen [Source:MGI Symbol;Acc:MGI:1328316]	-4.26792	-2.09353	-1.97403	-2.21303	4.35093e-30	1.50412e-26

## Sheet: so sp vs UI
Differentially expressed genes (adj P val ≥0.01 and linear FC ≥2 in WT BMDMs infected with H37Rv for 72 hours post infection at MOI 5; Differentially expressed genes presented in so/sp- relative to uninfected BMDMs.
Feature_ID	entrezgene	external_gene_name	gene_biotype	description	LinearFC	logFC	CI.L	CI.R	P.Value	adj.P.Val
ENSMUSG00000021322	27052	Aoah	protein_coding	acyloxyacyl hydrolase [Source:MGI Symbol;Acc:MGI:1350928]	5.51169	2.4625	2.383	2.54198	4.72669e-39	6.53606e-35
ENSMUSG00000024164	12266	C3	protein_coding	complement component 3 [Source:MGI Symbol;Acc:MGI:88227]	19.3797	4.27647	4.13239	4.42056	2.25556e-38	1.5595e-34
ENSMUSG00000023067	12575	Cdkn1a	protein_coding	cyclin-dependent kinase inhibitor 1A (P21) [Source:MGI Symbol;Acc:MGI:104556]	3.75915	1.91041	1.84125	1.97956	3.08284e-37	1.42098e-33
ENSMUSG00000061232	14972	H2-K1	protein_coding	histocompatibility 2, K1, K region [Source:MGI Symbol;Acc:MGI:95904]	2.74042	1.45439	1.39871	1.51008	2.375e-36	8.21038e-33
ENSMUSG00000056116	15039	H2-T22	protein_coding	histocompatibility 2, T region locus 22 [Source:MGI Symbol;Acc:MGI:95956]	4.69179	2.23014	2.14103	2.31925	1.11675e-35	2.65682e-32
ENSMUSG00000001128	18636	Cfp	protein_coding	complement factor properdin [Source:MGI Symbol;Acc:MGI:97545]	3.7092	1.89111	1.81548	1.96674	1.1528e-35	2.65682e-32
ENSMUSG00000025498	54123	Irf7	protein_coding	interferon regulatory factor 7 [Source:MGI Symbol;Acc:MGI:1859212]	4.85595	2.27975	2.18648	2.37302	2.63422e-35	5.20372e-32
ENSMUSG00000036067	227659	Slc2a6	protein_coding	solute carrier family 2 (facilitated glucose transporter), member 6 [Source:MGI Symbol;Acc:MGI:2443286]	7.40911	2.8893	2.76642	3.01218	1.07427e-34	1.85688e-31
ENSMUSG00000035929	15015	H2-Q4	protein_coding	histocompatibility 2, Q region locus 4 [Source:MGI Symbol;Acc:MGI:95933]	3.78494	1.92027	1.8365	2.00405	2.70529e-34	4.15653e-31
ENSMUSG00000033192	270084	Lpcat2	protein_coding	lysophosphatidylcholine acyltransferase 2 [Source:MGI Symbol;Acc:MGI:3606214]	6.07114	2.60197	2.48613	2.7178	5.63526e-34	7.79244e-31
ENSMUSG00000027514	58203	Zbp1	protein_coding	Z-DNA binding protein 1 [Source:MGI Symbol;Acc:MGI:1927449]	4.84611	2.27683	2.17513	2.37852	6.34738e-34	7.97924e-31
ENSMUSG00000058818	18733	Pirb	protein_coding	paired Ig-like receptor B [Source:MGI Symbol;Acc:MGI:894311]	2.46461	1.30136	1.2411	1.36162	2.33574e-33	2.69155e-30
ENSMUSG00000040033	20847	Stat2	protein_coding	signal transducer and activator of transcription 2 [Source:MGI Symbol;Acc:MGI:103039]	2.9306	1.5512	1.47901	1.62338	2.79682e-33	2.97495e-30
ENSMUSG00000060550	110558	H2-Q7	protein_coding	histocompatibility 2, Q region locus 7 [Source:MGI Symbol;Acc:MGI:95936]	14.9313	3.90026	3.71612	4.0844	4.71537e-33	4.65744e-30
ENSMUSG00000073409	110557	H2-Q6	protein_coding	histocompatibility 2, Q region locus 6 [Source:MGI Symbol;Acc:MGI:95935]	15.8577	3.98711	3.7976	4.17662	6.01063e-33	5.541e-30
ENSMUSG00000079362	NA	Gm43302	protein_coding	predicted gene 43302 [Source:MGI Symbol;Acc:MGI:5663439]	14.5081	3.85879	3.67137	4.04619	1.30943e-32	1.00594e-29
ENSMUSG00000022587	17069	Ly6e	protein_coding	lymphocyte antigen 6 complex, locus E [Source:MGI Symbol;Acc:MGI:106651]	3.53568	1.82199	1.73358	1.9104	1.26812e-32	1.00594e-29
ENSMUSG00000031304	16186	Il2rg	protein_coding	interleukin 2 receptor, gamma chain [Source:MGI Symbol;Acc:MGI:96551]	3.32449	1.73313	1.64787	1.8184	2.08645e-32	1.44257e-29
ENSMUSG00000011008	68279	Mcoln2	protein_coding	mucolipin 2 [Source:MGI Symbol;Acc:MGI:1915529]	3.4555	1.7889	1.70066	1.87713	2.2904e-32	1.50818e-29
ENSMUSG00000027580	229003	Helz2	protein_coding	helicase with zinc finger 2, transcriptional coactivator [Source:MGI Symbol;Acc:MGI:2385169]	3.42669	1.77682	1.68891	1.86472	2.55259e-32	1.60442e-29
ENSMUSG00000037405	15894	Icam1	protein_coding	intercellular adhesion molecule 1 [Source:MGI Symbol;Acc:MGI:96392]	4.48169	2.16404	2.05552	2.27256	4.15553e-32	2.39428e-29
ENSMUSG00000037321	21354	Tap1	protein_coding	transporter 1, ATP-binding cassette, sub-family B (MDR/TAP) [Source:MGI Symbol;Acc:MGI:98483]	2.82211	1.49677	1.42177	1.57177	4.03991e-32	2.39428e-29
ENSMUSG00000032193	16835	Ldlr	protein_coding	low density lipoprotein receptor [Source:MGI Symbol;Acc:MGI:96765]	7.21792	2.85158	2.70842	2.99475	4.33528e-32	2.39793e-29
ENSMUSG00000032661	246727	Oas3	protein_coding	2'-5' oligoadenylate synthetase 3 [Source:MGI Symbol;Acc:MGI:2180850]	2.83272	1.50219	1.42635	1.57802	5.28707e-32	2.70776e-29
ENSMUSG00000040296	230073	Ddx58	protein_coding	DEAD (Asp-Glu-Ala-Asp) box polypeptide 58 [Source:MGI Symbol;Acc:MGI:2442858]	2.76456	1.46705	1.39226	1.54184	7.52723e-32	3.58919e-29
ENSMUSG00000058624	14544	Gda	protein_coding	guanine deaminase [Source:MGI Symbol;Acc:MGI:95678]	9.88869	3.30578	3.1366	3.47496	8.63478e-32	3.98006e-29
ENSMUSG00000041827	231655	Oasl1	protein_coding	2'-5' oligoadenylate synthetase-like 1 [Source:MGI Symbol;Acc:MGI:2180849]	5.87894	2.55556	2.42452	2.68659	9.24797e-32	4.12519e-29
ENSMUSG00000075602	110454	Ly6a	protein_coding	lymphocyte antigen 6 complex, locus A [Source:MGI Symbol;Acc:MGI:107527]	10.5857	3.40405	3.22868	3.57942	1.09813e-31	4.74531e-29
ENSMUSG00000057191	382062	AB124611	protein_coding	cDNA sequence AB124611 [Source:MGI Symbol;Acc:MGI:3043001]	2.60643	1.38208	1.31016	1.45399	1.57136e-31	6.58446e-29
ENSMUSG00000002103	11432	Acp2	protein_coding	acid phosphatase 2, lysosomal [Source:MGI Symbol;Acc:MGI:87882]	2.10469	1.07361	1.0174	1.12982	1.96084e-31	7.97486e-29
ENSMUSG00000034459	15957	Ifit1	protein_coding	interferon-induced protein with tetratricopeptide repeats 1 [Source:MGI Symbol;Acc:MGI:99450]	4.65292	2.21814	2.1014	2.33487	2.36273e-31	9.33481e-29
ENSMUSG00000024679	68774	Ms4a6d	protein_coding	membrane-spanning 4-domains, subfamily A, member 6D [Source:MGI Symbol;Acc:MGI:1916024]	4.37201	2.1283	2.01546	2.24113	3.07492e-31	1.18111e-28
ENSMUSG00000029561	23962	Oasl2	protein_coding	2'-5' oligoadenylate synthetase-like 2 [Source:MGI Symbol;Acc:MGI:1344390]	2.12782	1.08938	1.03005	1.14871	8.10223e-31	3.02804e-28
ENSMUSG00000021871	NA	Gm49342	protein_coding	predicted gene, 49342 [Source:MGI Symbol;Acc:MGI:6121535]	3.17966	1.66887	1.57763	1.76012	9.30892e-31	3.38747e-28
ENSMUSG00000048234	67702	Rnf149	protein_coding	ring finger protein 149 [Source:MGI Symbol;Acc:MGI:2677438]	4.60221	2.20233	2.08155	2.3231	1.03601e-30	3.67334e-28
ENSMUSG00000029063	192185	Nadk	protein_coding	NAD kinase [Source:MGI Symbol;Acc:MGI:2183149]	2.42453	1.27771	1.20733	1.34808	1.21077e-30	4.18563e-28
ENSMUSG00000054676	72244	1600014C10Rik	protein_coding	RIKEN cDNA 1600014C10 gene [Source:MGI Symbol;Acc:MGI:1919494]	4.627	2.21008	2.08798	2.33217	1.34967e-30	4.44364e-28
ENSMUSG00000033880	19039	Lgals3bp	protein_coding	lectin, galactoside-binding, soluble, 3 binding protein [Source:MGI Symbol;Acc:MGI:99554]	2.37442	1.24758	1.17866	1.31649	1.34358e-30	4.44364e-28
ENSMUSG00000030403	22323	Vasp	protein_coding	vasodilator-stimulated phosphoprotein [Source:MGI Symbol;Acc:MGI:109268]	4.15906	2.05626	1.94169	2.17082	1.82974e-30	5.88411e-28
ENSMUSG00000026728	22352	Vim	protein_coding	vimentin [Source:MGI Symbol;Acc:MGI:98932]	2.28264	1.1907	1.12392	1.25748	2.31544e-30	7.2768e-28
ENSMUSG00000024014	18712	Pim1	protein_coding	proviral integration site 1 [Source:MGI Symbol;Acc:MGI:97584]	3.26047	1.70508	1.60835	1.80181	3.49256e-30	1.07322e-27
ENSMUSG00000027995	24088	Tlr2	protein_coding	toll-like receptor 2 [Source:MGI Symbol;Acc:MGI:1346060]	4.81142	2.26646	2.13675	2.39617	4.78503e-30	1.37849e-27
ENSMUSG00000042349	56489	Ikbke	protein_coding	inhibitor of kappaB kinase epsilon [Source:MGI Symbol;Acc:MGI:1929612]	2.70572	1.43601	1.35311	1.51891	6.5313e-30	1.84316e-27
ENSMUSG00000018920	66102	Cxcl16	protein_coding	chemokine (C-X-C motif) ligand 16 [Source:MGI Symbol;Acc:MGI:1932682]	2.53463	1.34177	1.26406	1.41949	7.33629e-30	2.02893e-27
ENSMUSG00000030830	16408	Itgal	protein_coding	integrin alpha L [Source:MGI Symbol;Acc:MGI:96606]	7.9889	2.998	2.82294	3.17305	9.8104e-30	2.62125e-27
ENSMUSG00000035493	21810	Tgfbi	protein_coding	transforming growth factor, beta induced [Source:MGI Symbol;Acc:MGI:99959]	2.76475	1.46715	1.38147	1.55283	9.85717e-30	2.62125e-27
ENSMUSG00000019970	20393	Sgk1	protein_coding	serum/glucocorticoid regulated kinase 1 [Source:MGI Symbol;Acc:MGI:1340062]	3.65004	1.86791	1.75827	1.97755	1.18409e-29	3.08934e-27
ENSMUSG00000030107	24110	Usp18	protein_coding	ubiquitin specific peptidase 18 [Source:MGI Symbol;Acc:MGI:1344364]	4.05086	2.01823	1.89959	2.13686	1.24637e-29	3.19162e-27
ENSMUSG00000031652	80750	N4bp1	protein_coding	NEDD4 binding protein 1 [Source:MGI Symbol;Acc:MGI:2136825]	3.89443	1.96141	1.84581	2.07701	1.36954e-29	3.44327e-27
ENSMUSG00000047945	17357	Marcksl1	protein_coding	MARCKS-like 1 [Source:MGI Symbol;Acc:MGI:97143]	8.02108	3.0038	2.82642	3.18117	1.46583e-29	3.61956e-27
ENSMUSG00000078853	16145	Igtp	protein_coding	interferon gamma induced GTPase [Source:MGI Symbol;Acc:MGI:107729]	2.90167	1.53689	1.44572	1.62805	1.71978e-29	4.04171e-27
ENSMUSG00000039191	19664	Rbpj	protein_coding	recombination signal binding protein for immunoglobulin kappa J region [Source:MGI Symbol;Acc:MGI:96522]	2.47636	1.30822	1.23061	1.38583	1.72957e-29	4.04171e-27
ENSMUSG00000021133	217684	Susd6	protein_coding	sushi domain containing 6 [Source:MGI Symbol;Acc:MGI:2444661]	2.06287	1.04465	0.982656	1.10665	1.75371e-29	4.04171e-27
ENSMUSG00000025790	108116	Slco3a1	protein_coding	solute carrier organic anion transporter family, member 3a1 [Source:MGI Symbol;Acc:MGI:1351867]	4.32986	2.11432	1.98855	2.24008	1.90211e-29	4.31186e-27
ENSMUSG00000015950	17969	Ncf1	protein_coding	neutrophil cytosolic factor 1 [Source:MGI Symbol;Acc:MGI:97283]	2.24018	1.16362	1.09435	1.23288	1.95438e-29	4.35889e-27
ENSMUSG00000026875	22029	Traf1	protein_coding	TNF receptor-associated factor 1 [Source:MGI Symbol;Acc:MGI:101836]	11.9365	3.57731	3.36375	3.79087	2.16488e-29	4.69837e-27
ENSMUSG00000018171	75909	Vmp1	protein_coding	vacuole membrane protein 1 [Source:MGI Symbol;Acc:MGI:1923159]	2.78247	1.47637	1.38822	1.56452	2.17454e-29	4.69837e-27
ENSMUSG00000003283	15162	Hck	protein_coding	hemopoietic cell kinase [Source:MGI Symbol;Acc:MGI:96052]	2.48318	1.31219	1.23368	1.39069	2.33385e-29	4.96499e-27
ENSMUSG00000002983	19698	Relb	protein_coding	avian reticuloendotheliosis viral (v-rel) oncogene related B [Source:MGI Symbol;Acc:MGI:103289]	3.0779	1.62194	1.52419	1.7197	3.04225e-29	6.37398e-27
ENSMUSG00000046718	69550	Bst2	protein_coding	bone marrow stromal cell antigen 2 [Source:MGI Symbol;Acc:MGI:1916800]	2.77732	1.47369	1.3842	1.56319	3.98024e-29	8.21475e-27
ENSMUSG00000071713	12983	Csf2rb	protein_coding	colony stimulating factor 2 receptor, beta, low-affinity (granulocyte-macrophage) [Source:MGI Symbol;Acc:MGI:1339759]	2.77099	1.4704	1.38075	1.56005	4.58617e-29	9.32611e-27
ENSMUSG00000027660	20482	Skil	protein_coding	SKI-like [Source:MGI Symbol;Acc:MGI:106203]	3.03739	1.60283	1.50479	1.70087	5.1567e-29	1.01867e-26
ENSMUSG00000026031	12633	Cflar	protein_coding	CASP8 and FADD-like apoptosis regulator [Source:MGI Symbol;Acc:MGI:1336166]	2.38018	1.25107	1.17455	1.32759	5.14706e-29	1.01867e-26
ENSMUSG00000024675	64380	Ms4a4c	protein_coding	membrane-spanning 4-domains, subfamily A, member 4C [Source:MGI Symbol;Acc:MGI:1927656]	18.0289	4.17224	3.91668	4.42779	5.41325e-29	1.05429e-26
ENSMUSG00000026821	19730	Ralgds	protein_coding	ral guanine nucleotide dissociation stimulator [Source:MGI Symbol;Acc:MGI:107485]	3.45575	1.789	1.67927	1.89873	5.68953e-29	1.09271e-26
ENSMUSG00000042659	66412	Arrdc4	protein_coding	arrestin domain containing 4 [Source:MGI Symbol;Acc:MGI:1913662]	4.61926	2.20766	2.0721	2.34323	5.92282e-29	1.1211e-26
ENSMUSG00000029366	13178	Dck	protein_coding	deoxycytidine kinase [Source:MGI Symbol;Acc:MGI:102726]	2.91182	1.54192	1.4471	1.63675	6.25362e-29	1.153e-26
ENSMUSG00000033066	14457	Gas7	protein_coding	growth arrest specific 7 [Source:MGI Symbol;Acc:MGI:1202388]	2.08256	1.05836	0.991656	1.12506	1.49793e-28	2.65556e-26
ENSMUSG00000040253	229900	Gbp7	protein_coding	guanylate binding protein 7 [Source:MGI Symbol;Acc:MGI:2444421]	3.88041	1.95621	1.83265	2.07977	1.61957e-28	2.79942e-26
ENSMUSG00000072620	20556	Slfn2	protein_coding	schlafen 2 [Source:MGI Symbol;Acc:MGI:1313258]	2.0409	1.0292	0.964205	1.0942	1.61056e-28	2.79942e-26
ENSMUSG00000015340	13058	Cybb	protein_coding	cytochrome b-245, beta polypeptide [Source:MGI Symbol;Acc:MGI:88574]	3.18086	1.66942	1.56366	1.77517	1.79448e-28	3.06347e-26
ENSMUSG00000030142	56619	Clec4e	protein_coding	C-type lectin domain family 4, member e [Source:MGI Symbol;Acc:MGI:1861232]	69.0161	6.10886	5.72175	6.49598	1.81713e-28	3.0643e-26
ENSMUSG00000017144	74194	Rnd3	protein_coding	Rho family GTPase 3 [Source:MGI Symbol;Acc:MGI:1921444]	3.98276	1.99377	1.86713	2.1204	1.97312e-28	3.28727e-26
ENSMUSG00000028108	13601	Ecm1	protein_coding	extracellular matrix protein 1 [Source:MGI Symbol;Acc:MGI:103060]	2.06438	1.04571	0.979189	1.11223	2.08257e-28	3.42831e-26
ENSMUSG00000020184	17246	Mdm2	protein_coding	transformed mouse 3T3 cell double minute 2 [Source:MGI Symbol;Acc:MGI:96952]	2.31796	1.21285	1.13566	1.29004	2.11883e-28	3.44695e-26
ENSMUSG00000032000	11796	Birc3	protein_coding	baculoviral IAP repeat-containing 3 [Source:MGI Symbol;Acc:MGI:1197007]	3.1367	1.64925	1.54384	1.75465	2.46074e-28	3.8226e-26
ENSMUSG00000006818	20656	Sod2	protein_coding	superoxide dismutase 2, mitochondrial [Source:MGI Symbol;Acc:MGI:98352]	16.1266	4.01137	3.75381	4.26893	2.89978e-28	4.40639e-26
ENSMUSG00000028037	99899	Ifi44	protein_coding	interferon-induced protein 44 [Source:MGI Symbol;Acc:MGI:2443016]	4.76401	2.25218	2.10704	2.39731	3.30051e-28	4.90747e-26
ENSMUSG00000064289	21353	Tank	protein_coding	TRAF family member-associated Nf-kappa B activator [Source:MGI Symbol;Acc:MGI:107676]	2.82869	1.50013	1.40288	1.59739	4.08563e-28	6.01022e-26
ENSMUSG00000026896	71586	Ifih1	protein_coding	interferon induced with helicase C domain 1 [Source:MGI Symbol;Acc:MGI:1918836]	2.30094	1.20222	1.12353	1.28092	5.74137e-28	8.26997e-26
ENSMUSG00000028270	14469	Gbp2	protein_coding	guanylate binding protein 2 [Source:MGI Symbol;Acc:MGI:102772]	4.54197	2.18332	2.03874	2.32789	8.66397e-28	1.2225e-25
ENSMUSG00000029798	67138	Herc6	protein_coding	hect domain and RLD 6 [Source:MGI Symbol;Acc:MGI:1914388]	2.82598	1.49875	1.3994	1.5981	9.0073e-28	1.25811e-25
ENSMUSG00000039934	212167	Gsap	protein_coding	gamma-secretase activating protein [Source:MGI Symbol;Acc:MGI:2442259]	3.46319	1.7921	1.67276	1.91145	1.06e-27	1.46577e-25
ENSMUSG00000027322	20612	Siglec1	protein_coding	sialic acid binding Ig-like lectin 1, sialoadhesin [Source:MGI Symbol;Acc:MGI:99668]	2.52306	1.33517	1.24605	1.42429	1.14961e-27	1.57394e-25
ENSMUSG00000038352	217151	Arl5c	protein_coding	ADP-ribosylation factor-like 5C [Source:MGI Symbol;Acc:MGI:3028577]	4.82756	2.27129	2.11934	2.42325	1.2465e-27	1.65737e-25
ENSMUSG00000066152	20530	Slc31a2	protein_coding	solute carrier family 31, member 2 [Source:MGI Symbol;Acc:MGI:1333844]	3.43734	1.78129	1.66216	1.90042	1.23227e-27	1.65737e-25
ENSMUSG00000049037	269799	Clec4a1	protein_coding	C-type lectin domain family 4, member a1 [Source:MGI Symbol;Acc:MGI:3036291]	2.65639	1.40947	1.31517	1.50376	1.24623e-27	1.65737e-25
ENSMUSG00000024772	13660	Ehd1	protein_coding	EH-domain containing 1 [Source:MGI Symbol;Acc:MGI:1341878]	3.69341	1.88495	1.75813	2.01178	1.5258e-27	1.93566e-25
ENSMUSG00000030990	233575	Pgap2	protein_coding	post-GPI attachment to proteins 2 [Source:MGI Symbol;Acc:MGI:2385286]	2.16055	1.1114	1.03665	1.18614	1.50225e-27	1.93566e-25
ENSMUSG00000009585	80287	Apobec3	protein_coding	apolipoprotein B mRNA editing enzyme, catalytic polypeptide 3 [Source:MGI Symbol;Acc:MGI:1933111]	2.35844	1.23783	1.15443	1.32124	1.60571e-27	2.00034e-25
ENSMUSG00000023961	224794	Enpp4	protein_coding	ectonucleotide pyrophosphatase/phosphodiesterase 4 [Source:MGI Symbol;Acc:MGI:2682634]	9.91447	3.30953	3.0858	3.53328	1.80628e-27	2.21038e-25
ENSMUSG00000071715	17972	Ncf4	protein_coding	neutrophil cytosolic factor 4 [Source:MGI Symbol;Acc:MGI:109186]	2.3609	1.23934	1.1555	1.32317	1.84557e-27	2.23864e-25
ENSMUSG00000018796	14081	Acsl1	protein_coding	acyl-CoA synthetase long-chain family member 1 [Source:MGI Symbol;Acc:MGI:102797]	15.8203	3.9837	3.71387	4.25354	1.93319e-27	2.32453e-25
ENSMUSG00000060519	30935	Tor3a	protein_coding	torsin family 3, member A [Source:MGI Symbol;Acc:MGI:1353652]	2.06258	1.04445	0.973584	1.11531	2.05086e-27	2.42387e-25
ENSMUSG00000016496	60533	Cd274	protein_coding	CD274 antigen [Source:MGI Symbol;Acc:MGI:1926446]	3.37593	1.75528	1.63579	1.87478	2.31336e-27	2.67066e-25
ENSMUSG00000000204	20558	Slfn4	protein_coding	schlafen 4 [Source:MGI Symbol;Acc:MGI:1329010]	22.7865	4.51011	4.20248	4.81774	2.47597e-27	2.80637e-25
ENSMUSG00000030786	16409	Itgam	protein_coding	integrin alpha M [Source:MGI Symbol;Acc:MGI:96607]	2.28796	1.19406	1.11251	1.27561	2.58964e-27	2.91135e-25
ENSMUSG00000019916	18451	P4ha1	protein_coding	procollagen-proline, 2-oxoglutarate 4-dioxygenase (proline 4-hydroxylase), alpha 1 polypeptide [Source:MGI Symbol;Acc:MGI:97463]	2.2283	1.15594	1.07697	1.23492	2.62582e-27	2.92821e-25
ENSMUSG00000066677	100033459	Ifi208	protein_coding	interferon activated gene 208 [Source:MGI Symbol;Acc:MGI:2442822]	4.5952	2.20013	2.04971	2.35054	2.68641e-27	2.97181e-25
ENSMUSG00000039747	269717	Orai2	protein_coding	ORAI calcium release-activated calcium modulator 2 [Source:MGI Symbol;Acc:MGI:2443195]	5.56237	2.4757	2.3058	2.6456	3.07294e-27	3.37243e-25
ENSMUSG00000030560	13032	Ctsc	protein_coding	cathepsin C [Source:MGI Symbol;Acc:MGI:109553]	2.25531	1.17332	1.09191	1.25474	4.53942e-27	4.82855e-25
ENSMUSG00000037849	102639543	Ifi206	protein_coding	interferon activated gene 206 [Source:MGI Symbol;Acc:MGI:3646410]	3.38114	1.75751	1.63549	1.87953	4.62529e-27	4.88233e-25
ENSMUSG00000028268	55932	Gbp3	protein_coding	guanylate binding protein 3 [Source:MGI Symbol;Acc:MGI:1926263]	4.51399	2.1744	2.02323	2.32558	4.86842e-27	5.0457e-25
ENSMUSG00000066861	23960	Oas1g	protein_coding	2'-5' oligoadenylate synthetase 1G [Source:MGI Symbol;Acc:MGI:97429]	2.71109	1.43887	1.33867	1.53907	5.14602e-27	5.27105e-25
ENSMUSG00000055172	50909	C1ra	protein_coding	complement component 1, r subcomponent A [Source:MGI Symbol;Acc:MGI:1355313]	6.30635	2.6568	2.47167	2.84194	5.27554e-27	5.36398e-25
ENSMUSG00000055994	257632	Nod2	protein_coding	nucleotide-binding oligomerization domain containing 2 [Source:MGI Symbol;Acc:MGI:2429397]	4.42561	2.14588	1.99583	2.29592	5.95556e-27	6.01121e-25
ENSMUSG00000035692	100038882	Isg15	protein_coding	ISG15 ubiquitin-like modifier [Source:MGI Symbol;Acc:MGI:1855694]	4.59532	2.20017	2.04573	2.3546	6.81818e-27	6.83201e-25
ENSMUSG00000022575	69146	Gsdmd	protein_coding	gasdermin D [Source:MGI Symbol;Acc:MGI:1916396]	2.05133	1.03656	0.963678	1.10944	7.23893e-27	7.14999e-25
ENSMUSG00000025225	18034	Nfkb2	protein_coding	nuclear factor of kappa light polypeptide gene enhancer in B cells 2, p49/p100 [Source:MGI Symbol;Acc:MGI:1099800]	2.85648	1.51424	1.40726	1.62121	8.55296e-27	8.21322e-25
ENSMUSG00000066150	20529	Slc31a1	protein_coding	solute carrier family 31, member 1 [Source:MGI Symbol;Acc:MGI:1333843]	2.48768	1.3148	1.22162	1.40799	9.58652e-27	9.07961e-25
ENSMUSG00000052776	246730	Oas1a	protein_coding	2'-5' oligoadenylate synthetase 1A [Source:MGI Symbol;Acc:MGI:2180860]	2.05424	1.0386	0.965005	1.1122	9.53312e-27	9.07961e-25
ENSMUSG00000030717	56312	Nupr1	protein_coding	nuclear protein transcription regulator 1 [Source:MGI Symbol;Acc:MGI:1891834]	8.81526	3.14	2.91721	3.3628	9.97835e-27	9.38644e-25
ENSMUSG00000030144	17474	Clec4d	protein_coding	C-type lectin domain family 4, member d [Source:MGI Symbol;Acc:MGI:1298389]	3.91712	1.96979	1.82945	2.11014	1.15492e-26	1.07183e-24
ENSMUSG00000023947	18037	Nfkbie	protein_coding	nuclear factor of kappa light polypeptide gene enhancer in B cells inhibitor, epsilon [Source:MGI Symbol;Acc:MGI:1194908]	5.42228	2.4389	2.26395	2.61385	1.46524e-26	1.32427e-24
ENSMUSG00000073491	623121	Ifi213	protein_coding	interferon activated gene 213 [Source:MGI Symbol;Acc:MGI:3695276]	3.45999	1.79077	1.66052	1.92102	2.38839e-26	2.05134e-24
ENSMUSG00000025044	20288	Msr1	protein_coding	macrophage scavenger receptor 1 [Source:MGI Symbol;Acc:MGI:98257]	2.9883	1.57932	1.46389	1.69475	2.83552e-26	2.39083e-24
ENSMUSG00000034641	217305	Cd300ld	protein_coding	CD300 molecule like family member d [Source:MGI Symbol;Acc:MGI:2442358]	2.17702	1.12236	1.0401	1.20461	3.12141e-26	2.61593e-24
ENSMUSG00000064120	56738	Mocs1	protein_coding	molybdenum cofactor synthesis 1 [Source:MGI Symbol;Acc:MGI:1928904]	4.09695	2.03455	1.8853	2.1838	3.2263e-26	2.68755e-24
ENSMUSG00000037820	21817	Tgm2	protein_coding	transglutaminase 2, C polypeptide [Source:MGI Symbol;Acc:MGI:98731]	3.80064	1.92624	1.78476	2.06773	3.37557e-26	2.76197e-24
ENSMUSG00000001281	16421	Itgb7	protein_coding	integrin beta 7 [Source:MGI Symbol;Acc:MGI:96616]	3.76003	1.91074	1.77041	2.05108	3.3655e-26	2.76197e-24
ENSMUSG00000021477	13039	Ctsl	protein_coding	cathepsin L [Source:MGI Symbol;Acc:MGI:88564]	2.52077	1.33387	1.23592	1.43182	3.34635e-26	2.76197e-24
ENSMUSG00000037580	14528	Gch1	protein_coding	GTP cyclohydrolase 1 [Source:MGI Symbol;Acc:MGI:95675]	2.95815	1.5647	1.44952	1.67988	3.64562e-26	2.96539e-24
ENSMUSG00000032322	19200	Pstpip1	protein_coding	proline-serine-threonine phosphatase-interacting protein 1 [Source:MGI Symbol;Acc:MGI:1321396]	2.06373	1.04525	0.968275	1.12223	3.70544e-26	2.99642e-24
ENSMUSG00000005667	17768	Mthfd2	protein_coding	methylenetetrahydrofolate dehydrogenase (NAD+ dependent), methenyltetrahydrofolate cyclohydrolase [Source:MGI Symbol;Acc:MGI:1338850]	4.76988	2.25395	2.08788	2.42002	3.76173e-26	3.02425e-24
ENSMUSG00000027035	241447	Cers6	protein_coding	ceramide synthase 6 [Source:MGI Symbol;Acc:MGI:2442564]	3.05656	1.61191	1.49307	1.73075	3.84589e-26	3.07405e-24
ENSMUSG00000043263	236312	Ifi209	protein_coding	interferon activated gene 209 [Source:MGI Symbol;Acc:MGI:2138243]	2.98671	1.57856	1.46187	1.69524	4.2177e-26	3.33271e-24
ENSMUSG00000037921	234311	Ddx60	protein_coding	DEAD (Asp-Glu-Ala-Asp) box polypeptide 60 [Source:MGI Symbol;Acc:MGI:2384570]	2.91405	1.54303	1.42898	1.65708	4.2102e-26	3.33271e-24
ENSMUSG00000024789	16452	Jak2	protein_coding	Janus kinase 2 [Source:MGI Symbol;Acc:MGI:96629]	3.12274	1.64281	1.52134	1.76428	4.26326e-26	3.34957e-24
ENSMUSG00000026131	13518	Dst	protein_coding	dystonin [Source:MGI Symbol;Acc:MGI:104627]	2.91677	1.54437	1.43014	1.65861	4.32179e-26	3.37637e-24
ENSMUSG00000024677	69774	Ms4a6b	protein_coding	membrane-spanning 4-domains, subfamily A, member 6B [Source:MGI Symbol;Acc:MGI:1917024]	3.07282	1.61956	1.49948	1.73964	4.69358e-26	3.62585e-24
ENSMUSG00000034248	67712	Slc25a37	protein_coding	solute carrier family 25, member 37 [Source:MGI Symbol;Acc:MGI:1914962]	3.1786	1.66839	1.54457	1.79222	4.86163e-26	3.73481e-24
ENSMUSG00000044350	210808	Lacc1	protein_coding	laccase domain containing 1 [Source:MGI Symbol;Acc:MGI:2445077]	2.21949	1.15023	1.06461	1.23584	5.38431e-26	4.1135e-24
ENSMUSG00000024053	246707	Emilin2	protein_coding	elastin microfibril interfacer 2 [Source:MGI Symbol;Acc:MGI:2389136]	3.17956	1.66883	1.54444	1.79322	5.65082e-26	4.29338e-24
ENSMUSG00000038301	71982	Snx10	protein_coding	sorting nexin 10 [Source:MGI Symbol;Acc:MGI:1919232]	2.55169	1.35145	1.25055	1.45235	5.99196e-26	4.50309e-24
ENSMUSG00000024953	54683	Prdx5	protein_coding	peroxiredoxin 5 [Source:MGI Symbol;Acc:MGI:1859821]	6.68266	2.74042	2.53537	2.94548	6.4744e-26	4.83318e-24
ENSMUSG00000021025	18035	Nfkbia	protein_coding	nuclear factor of kappa light polypeptide gene enhancer in B cells inhibitor, alpha [Source:MGI Symbol;Acc:MGI:104741]	3.39043	1.76147	1.6294	1.89353	6.93532e-26	5.12843e-24
ENSMUSG00000043953	54199	Ccrl2	protein_coding	chemokine (C-C motif) receptor-like 2 [Source:MGI Symbol;Acc:MGI:1920904]	7.33216	2.87424	2.65751	3.09097	8.47867e-26	6.10641e-24
ENSMUSG00000070031	434484	Sp140	protein_coding	Sp140 nuclear body protein [Source:MGI Symbol;Acc:MGI:3702467]	2.65251	1.40736	1.30101	1.51371	9.14584e-26	6.55278e-24
ENSMUSG00000015839	18024	Nfe2l2	protein_coding	nuclear factor, erythroid derived 2, like 2 [Source:MGI Symbol;Acc:MGI:108420]	2.22236	1.15209	1.06468	1.2395	1.05451e-25	7.44704e-24
ENSMUSG00000000386	NA	Mx1	protein_coding	MX dynamin-like GTPase 1 [Source:MGI Symbol;Acc:MGI:97243]	3.53317	1.82096	1.6825	1.95943	1.13858e-25	7.91174e-24
ENSMUSG00000035004	80719	Igsf6	protein_coding	immunoglobulin superfamily, member 6 [Source:MGI Symbol;Acc:MGI:1891393]	3.12487	1.64379	1.5181	1.76949	1.38526e-25	9.48288e-24
ENSMUSG00000045932	15958	Ifit2	protein_coding	interferon-induced protein with tetratricopeptide repeats 2 [Source:MGI Symbol;Acc:MGI:99449]	3.54692	1.82657	1.68531	1.96782	2.05795e-25	1.39497e-23
ENSMUSG00000047712	338362	Ust	protein_coding	uronyl-2-sulfotransferase [Source:MGI Symbol;Acc:MGI:2442406]	3.09197	1.62853	1.50237	1.75468	2.18175e-25	1.47167e-23
ENSMUSG00000028266	16911	Lmo4	protein_coding	LIM domain only 4 [Source:MGI Symbol;Acc:MGI:109360]	5.29197	2.40381	2.21705	2.59056	2.41622e-25	1.60632e-23
ENSMUSG00000069874	54396	Irgm2	protein_coding	immunity-related GTPase family M member 2 [Source:MGI Symbol;Acc:MGI:1926262]	2.44469	1.28965	1.18943	1.38988	2.44404e-25	1.6096e-23
ENSMUSG00000026827	14571	Gpd2	protein_coding	glycerol phosphate dehydrogenase 2, mitochondrial [Source:MGI Symbol;Acc:MGI:99778]	5.9569	2.57456	2.37264	2.77648	3.36379e-25	2.14352e-23
ENSMUSG00000003617	12870	Cp	protein_coding	ceruloplasmin [Source:MGI Symbol;Acc:MGI:88476]	4.65658	2.21927	2.04482	2.39372	3.63862e-25	2.28704e-23
ENSMUSG00000078763	20555	Slfn1	protein_coding	schlafen 1 [Source:MGI Symbol;Acc:MGI:1313259]	12.6118	3.6567	3.36902	3.94437	3.74468e-25	2.33249e-23
ENSMUSG00000023913	27226	Pla2g7	protein_coding	phospholipase A2, group VII (platelet-activating factor acetylhydrolase, plasma) [Source:MGI Symbol;Acc:MGI:1351327]	15.2617	3.93184	3.62207	4.24161	3.93834e-25	2.43122e-23
ENSMUSG00000091649	236451	Phf11b	protein_coding	PHD finger protein 11B [Source:MGI Symbol;Acc:MGI:3645789]	3.83703	1.93999	1.78712	2.09286	3.96655e-25	2.43775e-23
ENSMUSG00000024338	16913	Psmb8	protein_coding	proteasome (prosome, macropain) subunit, beta type 8 (large multifunctional peptidase 7) [Source:MGI Symbol;Acc:MGI:1346527]	2.20206	1.13885	1.04909	1.22861	3.99079e-25	2.4418e-23
ENSMUSG00000051439	12475	Cd14	protein_coding	CD14 antigen [Source:MGI Symbol;Acc:MGI:88318]	4.08913	2.03179	1.87148	2.19211	4.1518e-25	2.52912e-23
ENSMUSG00000036478	12226	Btg1	protein_coding	B cell translocation gene 1, anti-proliferative [Source:MGI Symbol;Acc:MGI:88215]	2.76682	1.46823	1.35225	1.5842	4.31499e-25	2.617e-23
ENSMUSG00000021109	15251	Hif1a	protein_coding	hypoxia inducible factor 1, alpha subunit [Source:MGI Symbol;Acc:MGI:106918]	5.65742	2.50014	2.3023	2.69798	4.59192e-25	2.76857e-23
ENSMUSG00000020057	71712	Dram1	protein_coding	DNA-damage regulated autophagy modulator 1 [Source:MGI Symbol;Acc:MGI:1918962]	4.35868	2.12389	1.95579	2.29199	4.62496e-25	2.76857e-23
ENSMUSG00000022180	50934	Slc7a8	protein_coding	solute carrier family 7 (cationic amino acid transporter, y+ system), member 8 [Source:MGI Symbol;Acc:MGI:1355323]	2.22171	1.15167	1.06053	1.24281	4.60547e-25	2.76857e-23
ENSMUSG00000043740	320148	B430306N03Rik	protein_coding	RIKEN cDNA B430306N03 gene [Source:MGI Symbol;Acc:MGI:2443478]	2.12392	1.08673	1.00049	1.17296	5.06536e-25	3.00617e-23
ENSMUSG00000028525	18578	Pde4b	protein_coding	phosphodiesterase 4B, cAMP specific [Source:MGI Symbol;Acc:MGI:99557]	7.01809	2.81108	2.5878	3.03436	5.23034e-25	3.09082e-23
ENSMUSG00000057596	209387	Trim30d	protein_coding	tripartite motif-containing 30D [Source:MGI Symbol;Acc:MGI:3035181]	2.20269	1.13927	1.04876	1.22977	5.25861e-25	3.0943e-23
ENSMUSG00000066682	545812	Pilrb2	protein_coding	paired immunoglobin-like type 2 receptor beta 2 [Source:MGI Symbol;Acc:MGI:2450535]	10.387	3.37671	3.10834	3.64509	5.34928e-25	3.13431e-23
ENSMUSG00000031278	50790	Acsl4	protein_coding	acyl-CoA synthetase long-chain family member 4 [Source:MGI Symbol;Acc:MGI:1354713]	2.55313	1.35227	1.2438	1.46074	7.37462e-25	4.19655e-23
ENSMUSG00000022895	23872	Ets2	protein_coding	E26 avian leukemia oncogene 2, 3' domain [Source:MGI Symbol;Acc:MGI:95456]	7.07242	2.8222	2.59501	3.0494	8.36273e-25	4.72e-23
ENSMUSG00000053113	12702	Socs3	protein_coding	suppressor of cytokine signaling 3 [Source:MGI Symbol;Acc:MGI:1201791]	15.0456	3.91127	3.59584	4.2267	8.89865e-25	4.96171e-23
ENSMUSG00000028859	12986	Csf3r	protein_coding	colony stimulating factor 3 receptor (granulocyte) [Source:MGI Symbol;Acc:MGI:1339755]	2.11566	1.08111	0.9939	1.16831	8.96552e-25	4.97893e-23
ENSMUSG00000015947	14129	Fcgr1	protein_coding	Fc receptor, IgG, high affinity I [Source:MGI Symbol;Acc:MGI:95498]	2.19578	1.13474	1.04306	1.2264	9.44501e-25	5.18276e-23
ENSMUSG00000071637	12609	Cebpd	protein_coding	CCAAT/enhancer binding protein (C/EBP), delta [Source:MGI Symbol;Acc:MGI:103573]	4.91377	2.29683	2.11116	2.48251	9.6726e-25	5.2452e-23
ENSMUSG00000023456	21991	Tpi1	protein_coding	triosephosphate isomerase 1 [Source:MGI Symbol;Acc:MGI:98797]	3.71063	1.89166	1.73857	2.04475	1.00447e-24	5.4257e-23
ENSMUSG00000078920	15953	Ifi47	protein_coding	interferon gamma inducible protein 47 [Source:MGI Symbol;Acc:MGI:99448]	2.70721	1.43681	1.32025	1.55336	1.09097e-24	5.8023e-23
ENSMUSG00000046245	231805	Pilra	protein_coding	paired immunoglobin-like type 2 receptor alpha [Source:MGI Symbol;Acc:MGI:2450529]	33.5096	5.0665	4.65372	5.47928	1.26889e-24	6.68422e-23
ENSMUSG00000030745	60504	Il21r	protein_coding	interleukin 21 receptor [Source:MGI Symbol;Acc:MGI:1890475]	2.66806	1.41579	1.3003	1.53127	1.32268e-24	6.92805e-23
ENSMUSG00000046879	15944	Irgm1	protein_coding	immunity-related GTPase family M member 1 [Source:MGI Symbol;Acc:MGI:107567]	2.05875	1.04177	0.95652	1.12702	1.47747e-24	7.68061e-23
ENSMUSG00000029009	17769	Mthfr	protein_coding	methylenetetrahydrofolate reductase [Source:MGI Symbol;Acc:MGI:106639]	2.04092	1.02922	0.944863	1.11358	1.56338e-24	8.06656e-23
ENSMUSG00000028064	20351	Sema4a	protein_coding	sema domain, immunoglobulin domain (Ig), transmembrane domain (TM) and short cytoplasmic domain, (semaphorin) 4A [Source:MGI Symbol;Acc:MGI:107560]	2.81072	1.49094	1.36862	1.61326	1.61514e-24	8.30268e-23
ENSMUSG00000051457	20737	Spn	protein_coding	sialophorin [Source:MGI Symbol;Acc:MGI:98384]	3.21986	1.687	1.54838	1.82561	1.70381e-24	8.69383e-23
ENSMUSG00000022906	80285	Parp9	protein_coding	poly (ADP-ribose) polymerase family, member 9 [Source:MGI Symbol;Acc:MGI:1933117]	2.01594	1.01145	0.928234	1.09467	1.78522e-24	9.07576e-23
ENSMUSG00000043017	19222	Ptgir	protein_coding	prostaglandin I receptor (IP) [Source:MGI Symbol;Acc:MGI:99535]	5.03768	2.33276	2.14069	2.52482	1.83e-24	9.2355e-23
ENSMUSG00000018899	16362	Irf1	protein_coding	interferon regulatory factor 1 [Source:MGI Symbol;Acc:MGI:96590]	2.04844	1.03453	0.949066	1.11999	2.05442e-24	1.03304e-22
ENSMUSG00000035208	276950	Slfn8	protein_coding	schlafen 8 [Source:MGI Symbol;Acc:MGI:2672859]	2.05007	1.03567	0.949162	1.12218	3.02057e-24	1.49173e-22
ENSMUSG00000076441	11898	Ass1	protein_coding	argininosuccinate synthetase 1 [Source:MGI Symbol;Acc:MGI:88090]	48.9433	5.61304	5.14386	6.08222	3.09348e-24	1.5223e-22
ENSMUSG00000040152	21825	Thbs1	protein_coding	thrombospondin 1 [Source:MGI Symbol;Acc:MGI:98737]	14.6711	3.87491	3.55044	4.19937	3.28779e-24	1.61218e-22
ENSMUSG00000033538	12363	Casp4	protein_coding	caspase 4, apoptosis-related cysteine peptidase [Source:MGI Symbol;Acc:MGI:107700]	2.95821	1.56472	1.43326	1.69618	3.69121e-24	1.79725e-22
ENSMUSG00000028599	21938	Tnfrsf1b	protein_coding	tumor necrosis factor receptor superfamily, member 1b [Source:MGI Symbol;Acc:MGI:1314883]	2.24334	1.16565	1.06766	1.26364	3.7734e-24	1.83083e-22
ENSMUSG00000015837	18412	Sqstm1	protein_coding	sequestosome 1 [Source:MGI Symbol;Acc:MGI:107931]	2.0145	1.01042	0.925255	1.09559	4.12934e-24	1.98957e-22
ENSMUSG00000075705	27361	Msrb1	protein_coding	methionine sulfoxide reductase B1 [Source:MGI Symbol;Acc:MGI:1351642]	2.51588	1.33106	1.21881	1.44332	4.20968e-24	2.02123e-22
ENSMUSG00000038539	107503	Atf5	protein_coding	activating transcription factor 5 [Source:MGI Symbol;Acc:MGI:2141857]	2.68878	1.42695	1.30655	1.54735	4.28113e-24	2.04843e-22
ENSMUSG00000026547	21346	Tagln2	protein_coding	transgelin 2 [Source:MGI Symbol;Acc:MGI:1312985]	2.19226	1.13242	1.03685	1.22798	4.30839e-24	2.05436e-22
ENSMUSG00000054072	60440	Iigp1	protein_coding	interferon inducible GTPase 1 [Source:MGI Symbol;Acc:MGI:1926259]	7.6716	2.93953	2.69022	3.18884	5.12165e-24	2.41714e-22
ENSMUSG00000053175	12051	Bcl3	protein_coding	B cell leukemia/lymphoma 3 [Source:MGI Symbol;Acc:MGI:88140]	2.95307	1.56222	1.42932	1.69511	5.68997e-24	2.65814e-22
ENSMUSG00000074896	15959	Ifit3	protein_coding	interferon-induced protein with tetratricopeptide repeats 3 [Source:MGI Symbol;Acc:MGI:1101055]	2.87099	1.52155	1.39209	1.65101	5.7174e-24	2.66142e-22
ENSMUSG00000017830	80861	Dhx58	protein_coding	DEXH (Asp-Glu-X-His) box polypeptide 58 [Source:MGI Symbol;Acc:MGI:1931560]	2.02919	1.0209	0.933739	1.10807	6.45762e-24	2.95682e-22
ENSMUSG00000042333	230979	Tnfrsf14	protein_coding	tumor necrosis factor receptor superfamily, member 14 (herpesvirus entry mediator) [Source:MGI Symbol;Acc:MGI:2675303]	2.54271	1.34637	1.23123	1.46151	6.82662e-24	3.10521e-22
ENSMUSG00000079419	73656	Ms4a6c	protein_coding	membrane-spanning 4-domains, subfamily A, member 6C [Source:MGI Symbol;Acc:MGI:2385644]	2.42381	1.27727	1.16779	1.38676	7.38884e-24	3.3173e-22
ENSMUSG00000018927	20305	Ccl6	protein_coding	chemokine (C-C motif) ligand 6 [Source:MGI Symbol;Acc:MGI:98263]	3.04141	1.60474	1.46706	1.74242	7.63535e-24	3.40586e-22
ENSMUSG00000074677	100038947	Sirpb1c	protein_coding	signal-regulatory protein beta 1C [Source:MGI Symbol;Acc:MGI:3807521]	11.7973	3.56038	3.25401	3.86676	8.45926e-24	3.73721e-22
ENSMUSG00000096727	16912	Psmb9	protein_coding	proteasome (prosome, macropain) subunit, beta type 9 (large multifunctional peptidase 2) [Source:MGI Symbol;Acc:MGI:1346526]	2.01064	1.00765	0.920928	1.09438	8.51666e-24	3.75059e-22
ENSMUSG00000001123	16859	Lgals9	protein_coding	lectin, galactose binding, soluble 9 [Source:MGI Symbol;Acc:MGI:109496]	2.06324	1.04491	0.954865	1.13496	8.90267e-24	3.89576e-22
ENSMUSG00000040483	327959	Xaf1	protein_coding	XIAP associated factor 1 [Source:MGI Symbol;Acc:MGI:3772572]	2.33087	1.22087	1.11536	1.32638	9.81717e-24	4.25554e-22
ENSMUSG00000051344	241075	Plekhm3	protein_coding	pleckstrin homology domain containing, family M, member 3 [Source:MGI Symbol;Acc:MGI:2443627]	2.15941	1.11063	1.0145	1.20677	1.03833e-23	4.47291e-22
ENSMUSG00000038679	83925	Trps1	protein_coding	transcriptional repressor GATA binding 1 [Source:MGI Symbol;Acc:MGI:1927616]	2.48782	1.31488	1.20081	1.42896	1.122e-23	4.80342e-22
ENSMUSG00000079197	19188	Psme2	protein_coding	proteasome (prosome, macropain) activator subunit 2 (PA28 beta) [Source:MGI Symbol;Acc:MGI:1096365]	2.2151	1.14737	1.04774	1.247	1.15801e-23	4.94229e-22
ENSMUSG00000003206	50498	Ebi3	protein_coding	Epstein-Barr virus induced gene 3 [Source:MGI Symbol;Acc:MGI:1354171]	2.36259	1.24037	1.13221	1.34852	1.33684e-23	5.63594e-22
ENSMUSG00000068245	219132	Phf11d	protein_coding	PHD finger protein 11D [Source:MGI Symbol;Acc:MGI:1277133]	3.5515	1.82843	1.6689	1.98796	1.36524e-23	5.72077e-22
ENSMUSG00000063229	16828	Ldha	protein_coding	lactate dehydrogenase A [Source:MGI Symbol;Acc:MGI:96759]	3.11669	1.64002	1.49675	1.78328	1.42341e-23	5.94651e-22
ENSMUSG00000028793	75234	Rnf19b	protein_coding	ring finger protein 19B [Source:MGI Symbol;Acc:MGI:1922484]	2.31392	1.21034	1.10434	1.31634	1.55248e-23	6.37024e-22
ENSMUSG00000020277	18641	Pfkl	protein_coding	phosphofructokinase, liver, B-type [Source:MGI Symbol;Acc:MGI:97547]	4.51772	2.17559	1.98494	2.36625	1.58753e-23	6.49477e-22
ENSMUSG00000040264	14468	Gbp2b	protein_coding	guanylate binding protein 2b [Source:MGI Symbol;Acc:MGI:95666]	5.06273	2.33991	2.13469	2.54514	1.63502e-23	6.66935e-22
ENSMUSG00000028893	230784	Sesn2	protein_coding	sestrin 2 [Source:MGI Symbol;Acc:MGI:2651874]	2.376	1.24854	1.13901	1.35806	1.64515e-23	6.69093e-22
ENSMUSG00000011752	18648	Pgam1	protein_coding	phosphoglycerate mutase 1 [Source:MGI Symbol;Acc:MGI:97552]	2.61218	1.38526	1.26337	1.50714	1.82706e-23	7.38729e-22
ENSMUSG00000029249	19712	Rest	protein_coding	RE1-silencing transcription factor [Source:MGI Symbol;Acc:MGI:104897]	2.53545	1.34224	1.22366	1.46081	2.09635e-23	8.35397e-22
ENSMUSG00000025161	80879	Slc16a3	protein_coding	solute carrier family 16 (monocarboxylic acid transporters), member 3 [Source:MGI Symbol;Acc:MGI:1933438]	8.90174	3.15409	2.87417	3.43401	2.45673e-23	9.70617e-22
ENSMUSG00000066684	170741	Pilrb1	protein_coding	paired immunoglobin-like type 2 receptor beta 1 [Source:MGI Symbol;Acc:MGI:2450532]	19.1321	4.25793	3.87982	4.63604	2.50736e-23	9.84993e-22
ENSMUSG00000060703	66205	Cd302	protein_coding	CD302 antigen [Source:MGI Symbol;Acc:MGI:1913455]	4.63602	2.21289	2.01596	2.40981	2.69809e-23	1.05692e-21
ENSMUSG00000013846	20442	St3gal1	protein_coding	ST3 beta-galactoside alpha-2,3-sialyltransferase 1 [Source:MGI Symbol;Acc:MGI:98304]	2.47578	1.30788	1.19138	1.42439	2.79347e-23	1.08812e-21
ENSMUSG00000054843	226255	Atrnl1	protein_coding	attractin like 1 [Source:MGI Symbol;Acc:MGI:2147749]	2.67816	1.42124	1.29459	1.5479	2.83067e-23	1.09951e-21
ENSMUSG00000035042	20304	Ccl5	protein_coding	chemokine (C-C motif) ligand 5 [Source:MGI Symbol;Acc:MGI:98262]	30.7445	4.94226	4.50141	5.38311	2.92613e-23	1.1334e-21
ENSMUSG00000026773	170768	Pfkfb3	protein_coding	6-phosphofructo-2-kinase/fructose-2,6-biphosphatase 3 [Source:MGI Symbol;Acc:MGI:2181202]	3.61571	1.85428	1.68884	2.01973	2.95154e-23	1.14005e-21
ENSMUSG00000020227	73914	Irak3	protein_coding	interleukin-1 receptor-associated kinase 3 [Source:MGI Symbol;Acc:MGI:1921164]	6.87947	2.7823	2.53275	3.03184	3.53235e-23	1.35306e-21
ENSMUSG00000021298	56696	Gpr132	protein_coding	G protein-coupled receptor 132 [Source:MGI Symbol;Acc:MGI:1890220]	2.98179	1.57618	1.43413	1.71823	4.16552e-23	1.561e-21
ENSMUSG00000027219	269346	Slc28a2	protein_coding	solute carrier family 28 (sodium-coupled nucleoside transporter), member 2 [Source:MGI Symbol;Acc:MGI:1913105]	3.40839	1.76909	1.60922	1.92895	4.57455e-23	1.70504e-21
ENSMUSG00000059108	213002	Ifitm6	protein_coding	interferon induced transmembrane protein 6 [Source:MGI Symbol;Acc:MGI:2686976]	6.79742	2.76499	2.51456	3.01542	4.94661e-23	1.83876e-21
ENSMUSG00000037997	101187	Parp11	protein_coding	poly (ADP-ribose) polymerase family, member 11 [Source:MGI Symbol;Acc:MGI:2141505]	2.11898	1.08337	0.984959	1.18178	5.47248e-23	2.01796e-21
ENSMUSG00000002227	17454	Mov10	protein_coding	Moloney leukemia virus 10 [Source:MGI Symbol;Acc:MGI:97054]	2.05428	1.03863	0.94416	1.13311	5.7282e-23	2.10664e-21
ENSMUSG00000044864	99696	Ankrd50	protein_coding	ankyrin repeat domain 50 [Source:MGI Symbol;Acc:MGI:2139777]	2.34261	1.22812	1.11621	1.34003	6.08798e-23	2.22123e-21
ENSMUSG00000057666	100042025	Gapdh	protein_coding	glyceraldehyde-3-phosphate dehydrogenase [Source:MGI Symbol;Acc:MGI:95640]	2.39088	1.25754	1.14269	1.37239	6.58442e-23	2.38975e-21
ENSMUSG00000023249	235587	Parp3	protein_coding	poly (ADP-ribose) polymerase family, member 3 [Source:MGI Symbol;Acc:MGI:1891258]	2.14469	1.10077	1.00011	1.20143	6.88416e-23	2.49199e-21
ENSMUSG00000031897	19171	Psmb10	protein_coding	proteasome (prosome, macropain) subunit, beta type 10 [Source:MGI Symbol;Acc:MGI:1096380]	2.1188	1.08325	0.983874	1.18262	7.67124e-23	2.74813e-21
ENSMUSG00000031504	19332	Rab20	protein_coding	RAB20, member RAS oncogene family [Source:MGI Symbol;Acc:MGI:102789]	3.62554	1.8582	1.68756	2.02883	7.94159e-23	2.83763e-21
ENSMUSG00000028645	20525	Slc2a1	protein_coding	solute carrier family 2 (facilitated glucose transporter), member 1 [Source:MGI Symbol;Acc:MGI:95755]	5.60991	2.48798	2.25814	2.71782	9.74528e-23	3.44649e-21
ENSMUSG00000024397	11629	Aif1	protein_coding	allograft inflammatory factor 1 [Source:MGI Symbol;Acc:MGI:1343098]	2.26552	1.17984	1.06964	1.29003	1.41856e-22	4.9286e-21
ENSMUSG00000009185	20307	Ccl8	protein_coding	chemokine (C-C motif) ligand 8 [Source:MGI Symbol;Acc:MGI:101878]	25.056	4.64708	4.21281	5.08135	1.44575e-22	5.01049e-21
ENSMUSG00000036381	140795	P2ry14	protein_coding	purinergic receptor P2Y, G-protein coupled, 14 [Source:MGI Symbol;Acc:MGI:2155705]	2.97576	1.57326	1.426	1.72051	1.52653e-22	5.2772e-21
ENSMUSG00000021281	21928	Tnfaip2	protein_coding	tumor necrosis factor, alpha-induced protein 2 [Source:MGI Symbol;Acc:MGI:104960]	2.06501	1.04615	0.947964	1.14434	1.67658e-22	5.73857e-21
ENSMUSG00000022126	16365	Acod1	protein_coding	aconitate decarboxylase 1 [Source:MGI Symbol;Acc:MGI:103206]	378.728	8.56502	7.75992	9.37011	1.76609e-22	6.03e-21
ENSMUSG00000061666	66569	Gdpd1	protein_coding	glycerophosphodiester phosphodiesterase domain containing 1 [Source:MGI Symbol;Acc:MGI:1913819]	2.34105	1.22716	1.11152	1.34279	1.92087e-22	6.49431e-21
ENSMUSG00000026489	67426	Coq8a	protein_coding	coenzyme Q8A [Source:MGI Symbol;Acc:MGI:1914676]	4.99245	2.31975	2.1009	2.5386	2.00043e-22	6.73039e-21
ENSMUSG00000031662	71607	Snx20	protein_coding	sorting nexin 20 [Source:MGI Symbol;Acc:MGI:1918857]	2.09845	1.06932	0.967885	1.17076	2.41473e-22	7.9502e-21
ENSMUSG00000020641	58185	Rsad2	protein_coding	radical S-adenosyl methionine domain containing 2 [Source:MGI Symbol;Acc:MGI:1929628]	2.88544	1.52879	1.38336	1.67422	2.65485e-22	8.67878e-21
ENSMUSG00000049327	67956	Kmt5a	protein_coding	lysine methyltransferase 5A [Source:MGI Symbol;Acc:MGI:1915206]	3.51331	1.81283	1.6403	1.98537	2.70146e-22	8.81032e-21
ENSMUSG00000025203	20250	Scd2	protein_coding	stearoyl-Coenzyme A desaturase 2 [Source:MGI Symbol;Acc:MGI:98240]	5.83241	2.54409	2.30174	2.78644	2.78525e-22	9.06222e-21
ENSMUSG00000026536	381308	Ifi211	protein_coding	interferon activated gene 211 [Source:MGI Symbol;Acc:MGI:3041120]	2.58588	1.37066	1.24004	1.50128	2.82205e-22	9.1604e-21
ENSMUSG00000023206	16169	Il15ra	protein_coding	interleukin 15 receptor, alpha chain [Source:MGI Symbol;Acc:MGI:104644]	3.97271	1.99012	1.80035	2.1799	2.88297e-22	9.33623e-21
ENSMUSG00000025959	93691	Klf7	protein_coding	Kruppel-like factor 7 (ubiquitous) [Source:MGI Symbol;Acc:MGI:1935151]	4.24126	2.08449	1.88567	2.28332	2.9102e-22	9.38049e-21
ENSMUSG00000060477	108960	Irak2	protein_coding	interleukin-1 receptor-associated kinase 2 [Source:MGI Symbol;Acc:MGI:2429603]	2.04523	1.03226	0.933808	1.13072	2.90451e-22	9.38049e-21
ENSMUSG00000026104	20846	Stat1	protein_coding	signal transducer and activator of transcription 1 [Source:MGI Symbol;Acc:MGI:103063]	2.01429	1.01028	0.913897	1.10665	2.92525e-22	9.40705e-21
ENSMUSG00000012519	74568	Mlkl	protein_coding	mixed lineage kinase domain-like [Source:MGI Symbol;Acc:MGI:1921818]	2.80005	1.48545	1.34328	1.62762	3.27129e-22	1.0447e-20
ENSMUSG00000020638	22169	Cmpk2	protein_coding	cytidine monophosphate (UMP-CMP) kinase 2, mitochondrial [Source:MGI Symbol;Acc:MGI:99830]	2.37994	1.25092	1.13112	1.37073	3.34463e-22	1.06566e-20
ENSMUSG00000037012	15275	Hk1	protein_coding	hexokinase 1 [Source:MGI Symbol;Acc:MGI:96103]	2.0716	1.05075	0.9501	1.15139	3.35868e-22	1.06767e-20
ENSMUSG00000045658	98496	Pid1	protein_coding	phosphotyrosine interaction domain containing 1 [Source:MGI Symbol;Acc:MGI:2138391]	2.01503	1.0108	0.913801	1.1078	3.5799e-22	1.1302e-20
ENSMUSG00000018986	20557	Slfn3	protein_coding	schlafen 3 [Source:MGI Symbol;Acc:MGI:1329005]	3.42229	1.77496	1.60425	1.94568	3.86573e-22	1.20667e-20
ENSMUSG00000040829	574428	Zmynd15	protein_coding	zinc finger, MYND-type containing 15 [Source:MGI Symbol;Acc:MGI:3603821]	2.90212	1.53711	1.38904	1.68518	4.07681e-22	1.26104e-20
ENSMUSG00000052821	58861	Cysltr1	protein_coding	cysteinyl leukotriene receptor 1 [Source:MGI Symbol;Acc:MGI:1926218]	3.30806	1.72599	1.55923	1.89275	4.51247e-22	1.37745e-20
ENSMUSG00000036138	113868	Acaa1a	protein_coding	acetyl-Coenzyme A acyltransferase 1A [Source:MGI Symbol;Acc:MGI:2148491]	2.05576	1.03967	0.939199	1.14014	4.54404e-22	1.38403e-20
ENSMUSG00000020806	217344	Rhbdf2	protein_coding	rhomboid 5 homolog 2 [Source:MGI Symbol;Acc:MGI:2442473]	2.01792	1.01287	0.914968	1.11077	4.57784e-22	1.39126e-20
ENSMUSG00000078921	100039796	Tgtp2	protein_coding	T cell specific GTPase 2 [Source:MGI Symbol;Acc:MGI:3710083]	3.40259	1.76663	1.59578	1.93749	4.66896e-22	1.41584e-20
ENSMUSG00000031429	53380	Psmd10	protein_coding	proteasome (prosome, macropain) 26S subunit, non-ATPase, 10 [Source:MGI Symbol;Acc:MGI:1858898]	3.40007	1.76557	1.59476	1.93637	4.71155e-22	1.42252e-20
ENSMUSG00000063524	13806	Eno1	protein_coding	enolase 1, alpha non-neuron [Source:MGI Symbol;Acc:MGI:95393]	3.02263	1.59581	1.44114	1.75047	5.01642e-22	1.51126e-20
ENSMUSG00000001627	15982	Ifrd1	protein_coding	interferon-related developmental regulator 1 [Source:MGI Symbol;Acc:MGI:1316717]	2.63175	1.39602	1.26051	1.53154	5.29106e-22	1.59054e-20
ENSMUSG00000026315	20725	Serpinb8	protein_coding	serine (or cysteine) peptidase inhibitor, clade B, member 8 [Source:MGI Symbol;Acc:MGI:894657]	5.0151	2.32628	2.09934	2.55322	6.26421e-22	1.87087e-20
ENSMUSG00000027078	56791	Ube2l6	protein_coding	ubiquitin-conjugating enzyme E2L 6 [Source:MGI Symbol;Acc:MGI:1914500]	2.235	1.16027	1.04691	1.27364	6.6038e-22	1.9596e-20
ENSMUSG00000054203	226695	Ifi205	protein_coding	interferon activated gene 205 [Source:MGI Symbol;Acc:MGI:101847]	6.83708	2.77338	2.5019	3.04486	7.03964e-22	2.07557e-20
ENSMUSG00000098188	268301	Sowahc	protein_coding	sosondowah ankyrin repeat domain family member C [Source:MGI Symbol;Acc:MGI:3606051]	3.08599	1.62573	1.46616	1.7853	7.7197e-22	2.26161e-20
ENSMUSG00000020400	57783	Tnip1	protein_coding	TNFAIP3 interacting protein 1 [Source:MGI Symbol;Acc:MGI:1926194]	2.0916	1.06461	0.960097	1.16912	7.75936e-22	2.26842e-20
ENSMUSG00000041801	27280	Phlda3	protein_coding	pleckstrin homology like domain, family A, member 3 [Source:MGI Symbol;Acc:MGI:1351485]	4.80419	2.26429	2.0417	2.48689	8.13575e-22	2.36151e-20
ENSMUSG00000027646	20779	Src	protein_coding	Rous sarcoma oncogene [Source:MGI Symbol;Acc:MGI:98397]	7.46361	2.89987	2.61473	3.18502	8.20002e-22	2.36229e-20
ENSMUSG00000031639	142980	Tlr3	protein_coding	toll-like receptor 3 [Source:MGI Symbol;Acc:MGI:2156367]	2.787	1.47871	1.33331	1.62411	8.19335e-22	2.36229e-20
ENSMUSG00000000184	12444	Ccnd2	protein_coding	cyclin D2 [Source:MGI Symbol;Acc:MGI:88314]	3.23151	1.69221	1.52479	1.85963	1.00971e-21	2.88478e-20
ENSMUSG00000040774	99712	Cept1	protein_coding	choline/ethanolaminephosphotransferase 1 [Source:MGI Symbol;Acc:MGI:2139793]	2.11629	1.08154	0.974513	1.18857	1.01779e-21	2.90187e-20
ENSMUSG00000023349	56620	Clec4n	protein_coding	C-type lectin domain family 4, member n [Source:MGI Symbol;Acc:MGI:1861231]	3.87403	1.95383	1.76034	2.14733	1.04456e-21	2.97205e-20
ENSMUSG00000056501	12608	Cebpb	protein_coding	CCAAT/enhancer binding protein (C/EBP), beta [Source:MGI Symbol;Acc:MGI:88373]	4.64786	2.21657	1.99642	2.43671	1.15079e-21	3.25423e-20
ENSMUSG00000036469	72925	44621	protein_coding	membrane-associated ring finger (C3HC4) 1 [Source:MGI Symbol;Acc:MGI:1920175]	2.24325	1.16559	1.04968	1.2815	1.20249e-21	3.39348e-20
ENSMUSG00000031438	66889	Rnf128	protein_coding	ring finger protein 128 [Source:MGI Symbol;Acc:MGI:1914139]	2.219	1.14991	1.03493	1.26489	1.44742e-21	4.00836e-20
ENSMUSG00000071068	328833	Treml2	protein_coding	triggering receptor expressed on myeloid cells-like 2 [Source:MGI Symbol;Acc:MGI:2147038]	3.76119	1.91119	1.71968	2.1027	1.55544e-21	4.27608e-20
ENSMUSG00000036427	14751	Gpi1	protein_coding	glucose phosphate isomerase 1 [Source:MGI Symbol;Acc:MGI:95797]	2.17539	1.12127	1.00873	1.23382	1.64704e-21	4.50403e-20
ENSMUSG00000024339	21355	Tap2	protein_coding	transporter 2, ATP-binding cassette, sub-family B (MDR/TAP) [Source:MGI Symbol;Acc:MGI:98484]	2.00244	1.00176	0.900923	1.10259	1.81302e-21	4.91576e-20
ENSMUSG00000044712	625098	Slc38a6	protein_coding	solute carrier family 38, member 6 [Source:MGI Symbol;Acc:MGI:3648156]	2.17222	1.11917	1.00645	1.2319	1.85178e-21	5.00125e-20
ENSMUSG00000028124	14630	Gclm	protein_coding	glutamate-cysteine ligase, modifier subunit [Source:MGI Symbol;Acc:MGI:104995]	2.91097	1.5415	1.38584	1.69715	2.01736e-21	5.42724e-20
ENSMUSG00000029915	23845	Clec5a	protein_coding	C-type lectin domain family 5, member a [Source:MGI Symbol;Acc:MGI:1345151]	4.50734	2.17228	1.95273	2.39182	2.07937e-21	5.5832e-20
ENSMUSG00000024424	72747	Ttc39c	protein_coding	tetratricopeptide repeat domain 39C [Source:MGI Symbol;Acc:MGI:1919997]	4.10894	2.03877	1.83269	2.24484	2.08785e-21	5.59511e-20
ENSMUSG00000090942	240328	F830016B08Rik	protein_coding	RIKEN cDNA F830016B08 gene [Source:MGI Symbol;Acc:MGI:3588218]	3.44852	1.78598	1.60533	1.96662	2.13552e-21	5.7118e-20
ENSMUSG00000030695	11674	Aldoa	protein_coding	aldolase A, fructose-bisphosphate [Source:MGI Symbol;Acc:MGI:87994]	2.23463	1.16004	1.04263	1.27744	2.18042e-21	5.8094e-20
ENSMUSG00000044703	219131	Phf11a	protein_coding	PHD finger protein 11A [Source:MGI Symbol;Acc:MGI:1918441]	4.70367	2.23379	2.00725	2.46033	2.33668e-21	6.21378e-20
ENSMUSG00000035164	244871	Zc3h12c	protein_coding	zinc finger CCCH type containing 12C [Source:MGI Symbol;Acc:MGI:3026959]	2.07401	1.05242	0.945159	1.15968	2.76219e-21	7.28591e-20
ENSMUSG00000034118	22021	Tpst1	protein_coding	protein-tyrosine sulfotransferase 1 [Source:MGI Symbol;Acc:MGI:1298231]	2.25517	1.17324	1.05353	1.29295	2.86586e-21	7.50551e-20
ENSMUSG00000032691	216799	Nlrp3	protein_coding	NLR family, pyrin domain containing 3 [Source:MGI Symbol;Acc:MGI:2653833]	2.33835	1.22549	1.10041	1.35057	2.89799e-21	7.56102e-20
ENSMUSG00000038387	20130	Rras	protein_coding	related RAS viral (r-ras) oncogene [Source:MGI Symbol;Acc:MGI:98179]	2.70749	1.43695	1.28982	1.58409	3.22714e-21	8.34109e-20
ENSMUSG00000025429	19201	Pstpip2	protein_coding	proline-serine-threonine phosphatase-interacting protein 2 [Source:MGI Symbol;Acc:MGI:1335088]	5.93305	2.56878	2.30466	2.83289	3.71305e-21	9.43824e-20
ENSMUSG00000044948	100048534	Cfap43	protein_coding	cilia and flagella associated protein 43 [Source:MGI Symbol;Acc:MGI:1289258]	2.3512	1.2334	1.10652	1.36028	3.77634e-21	9.56397e-20
ENSMUSG00000022822	27416	Abcc5	protein_coding	ATP-binding cassette, sub-family C (CFTR/MRP), member 5 [Source:MGI Symbol;Acc:MGI:1351644]	2.29965	1.20142	1.07773	1.3251	3.87975e-21	9.78999e-20
ENSMUSG00000074151	434341	Nlrc5	protein_coding	NLR family, CARD domain containing 5 [Source:MGI Symbol;Acc:MGI:3612191]	2.05803	1.04126	0.934048	1.14847	3.89722e-21	9.81616e-20
ENSMUSG00000023951	22339	Vegfa	protein_coding	vascular endothelial growth factor A [Source:MGI Symbol;Acc:MGI:103178]	2.57816	1.36634	1.22543	1.50725	4.11331e-21	1.03416e-19
ENSMUSG00000060591	80876	Ifitm2	protein_coding	interferon induced transmembrane protein 2 [Source:MGI Symbol;Acc:MGI:1933382]	2.21322	1.14615	1.02767	1.26462	4.44625e-21	1.11108e-19
ENSMUSG00000056220	18783	Pla2g4a	protein_coding	phospholipase A2, group IVA (cytosolic, calcium-dependent) [Source:MGI Symbol;Acc:MGI:1195256]	2.8714	1.52175	1.36438	1.67912	4.51374e-21	1.12057e-19
ENSMUSG00000038188	380713	Scarf1	protein_coding	scavenger receptor class F, member 1 [Source:MGI Symbol;Acc:MGI:2449455]	2.38853	1.25612	1.12596	1.38628	4.83133e-21	1.18664e-19
ENSMUSG00000041571	20364	Selenow	protein_coding	selenoprotein W [Source:MGI Symbol;Acc:MGI:1100878]	2.22095	1.15118	1.03133	1.27103	5.65366e-21	1.38125e-19
ENSMUSG00000021728	13723	Emb	protein_coding	embigin [Source:MGI Symbol;Acc:MGI:95321]	2.6075	1.38267	1.23818	1.52716	6.41055e-21	1.55791e-19
ENSMUSG00000029780	107569	Nt5c3	protein_coding	5'-nucleotidase, cytosolic III [Source:MGI Symbol;Acc:MGI:1927186]	2.35965	1.23857	1.1088	1.36834	7.00437e-21	1.69034e-19
ENSMUSG00000032294	18746	Pkm	protein_coding	pyruvate kinase, muscle [Source:MGI Symbol;Acc:MGI:97591]	2.19177	1.13209	1.01338	1.25081	7.21165e-21	1.73733e-19
ENSMUSG00000041936	11603	Agrn	protein_coding	agrin [Source:MGI Symbol;Acc:MGI:87961]	2.36453	1.24155	1.11096	1.37214	7.98559e-21	1.91046e-19
ENSMUSG00000024529	16948	Lox	protein_coding	lysyl oxidase [Source:MGI Symbol;Acc:MGI:96817]	14.1549	3.82323	3.42043	4.22603	8.4374e-21	2.00813e-19
ENSMUSG00000062070	18655	Pgk1	protein_coding	phosphoglycerate kinase 1 [Source:MGI Symbol;Acc:MGI:97555]	2.79941	1.48512	1.32818	1.64207	9.34896e-21	2.22126e-19
ENSMUSG00000019832	67844	Rab32	protein_coding	RAB32, member RAS oncogene family [Source:MGI Symbol;Acc:MGI:1915094]	2.38511	1.25405	1.121	1.38711	1.06797e-20	2.52011e-19
ENSMUSG00000034271	81703	Jdp2	protein_coding	Jun dimerization protein 2 [Source:MGI Symbol;Acc:MGI:1932093]	3.24554	1.69846	1.51789	1.87902	1.14226e-20	2.68626e-19
ENSMUSG00000006517	192156	Mvd	protein_coding	mevalonate (diphospho) decarboxylase [Source:MGI Symbol;Acc:MGI:2179327]	3.16697	1.6631	1.48609	1.84012	1.18808e-20	2.78548e-19
ENSMUSG00000026110	269181	Mgat4a	protein_coding	mannoside acetylglucosaminyltransferase 4, isoenzyme A [Source:MGI Symbol;Acc:MGI:2662992]	2.07404	1.05244	0.940397	1.16449	1.19745e-20	2.79701e-19
ENSMUSG00000038058	107607	Nod1	protein_coding	nucleotide-binding oligomerization domain containing 1 [Source:MGI Symbol;Acc:MGI:1341839]	2.33044	1.2206	1.09062	1.35058	1.20824e-20	2.81747e-19
ENSMUSG00000000628	15277	Hk2	protein_coding	hexokinase 2 [Source:MGI Symbol;Acc:MGI:1315197]	2.87377	1.52294	1.36065	1.68523	1.23643e-20	2.8735e-19
ENSMUSG00000015501	15273	Hivep2	protein_coding	human immunodeficiency virus type I enhancer binding protein 2 [Source:MGI Symbol;Acc:MGI:1338076]	2.19696	1.13551	1.01415	1.25687	1.36464e-20	3.13981e-19
ENSMUSG00000045294	231070	Insig1	protein_coding	insulin induced gene 1 [Source:MGI Symbol;Acc:MGI:1916289]	2.03637	1.026	0.91565	1.13635	1.68609e-20	3.79727e-19
ENSMUSG00000039236	57444	Isg20	protein_coding	interferon-stimulated protein [Source:MGI Symbol;Acc:MGI:1928895]	4.30879	2.10728	1.8804	2.33417	1.74519e-20	3.91487e-19
ENSMUSG00000062300	19294	Nectin2	protein_coding	nectin cell adhesion molecule 2 [Source:MGI Symbol;Acc:MGI:97822]	2.697	1.43135	1.27662	1.58609	1.99903e-20	4.45848e-19
ENSMUSG00000031488	75767	Rab11fip1	protein_coding	RAB11 family interacting protein 1 (class I) [Source:MGI Symbol;Acc:MGI:1923017]	3.22995	1.69151	1.50796	1.87506	2.26907e-20	5.02027e-19
ENSMUSG00000046207	104709	Pik3r6	protein_coding	phosphoinositide-3-kinase regulatory subunit 5 [Source:MGI Symbol;Acc:MGI:2144613]	2.08485	1.05994	0.944307	1.17558	2.71122e-20	5.89477e-19
ENSMUSG00000022831	15163	Hcls1	protein_coding	hematopoietic cell specific Lyn substrate 1 [Source:MGI Symbol;Acc:MGI:104568]	2.1995	1.13718	1.01309	1.26126	2.72894e-20	5.92398e-19
ENSMUSG00000073555	240327	Gm4951	protein_coding	predicted gene 4951 [Source:MGI Symbol;Acc:MGI:3644953]	3.02531	1.59709	1.42269	1.77148	2.79448e-20	6.05674e-19
ENSMUSG00000062488	667370	Ifit3b	protein_coding	interferon-induced protein with tetratricopeptide repeats 3B [Source:MGI Symbol;Acc:MGI:3698419]	2.65509	1.40876	1.2548	1.56272	2.87509e-20	6.21199e-19
ENSMUSG00000025492	66141	Ifitm3	protein_coding	interferon induced transmembrane protein 3 [Source:MGI Symbol;Acc:MGI:1913391]	2.02795	1.02002	0.908423	1.13162	2.98372e-20	6.43665e-19
ENSMUSG00000026701	11758	Prdx6	protein_coding	peroxiredoxin 6 [Source:MGI Symbol;Acc:MGI:894320]	2.41592	1.27257	1.13319	1.41195	3.09163e-20	6.64868e-19
ENSMUSG00000021831	50527	Ero1l	protein_coding	ERO1-like (S. cerevisiae) [Source:MGI Symbol;Acc:MGI:1354385]	4.68727	2.22875	1.98402	2.47347	3.36412e-20	7.14579e-19
ENSMUSG00000039232	74732	Stx11	protein_coding	syntaxin 11 [Source:MGI Symbol;Acc:MGI:1921982]	4.67977	2.22644	1.98199	2.47089	3.35499e-20	7.14579e-19
ENSMUSG00000000682	23833	Cd52	protein_coding	CD52 antigen [Source:MGI Symbol;Acc:MGI:1346088]	2.36761	1.24343	1.10687	1.37999	3.38557e-20	7.18032e-19
ENSMUSG00000029135	14284	Fosl2	protein_coding	fos-like antigen 2 [Source:MGI Symbol;Acc:MGI:102858]	3.67415	1.87741	1.67083	2.08399	3.60726e-20	7.59227e-19
ENSMUSG00000033720	94282	Sfxn5	protein_coding	sideroflexin 5 [Source:MGI Symbol;Acc:MGI:2137681]	2.30218	1.203	1.07049	1.33551	3.73949e-20	7.85862e-19
ENSMUSG00000003541	15937	Ier3	protein_coding	immediate early response 3 [Source:MGI Symbol;Acc:MGI:104814]	6.3742	2.67224	2.37737	2.96712	3.9663e-20	8.31e-19
ENSMUSG00000043336	78749	Filip1l	protein_coding	filamin A interacting protein 1-like [Source:MGI Symbol;Acc:MGI:1925999]	3.71173	1.89209	1.68278	2.10141	4.31348e-20	9.01009e-19
ENSMUSG00000021069	110095	Pygl	protein_coding	liver glycogen phosphorylase [Source:MGI Symbol;Acc:MGI:97829]	2.37281	1.24659	1.10859	1.3846	4.42034e-20	9.21938e-19
ENSMUSG00000063659	30928	Zbtb18	protein_coding	zinc finger and BTB domain containing 18 [Source:MGI Symbol;Acc:MGI:1353609]	2.07911	1.05597	0.938509	1.17343	5.17752e-20	1.06224e-18
ENSMUSG00000028874	14191	Fgr	protein_coding	FGR proto-oncogene, Src family tyrosine kinase [Source:MGI Symbol;Acc:MGI:95527]	25.5379	4.67457	4.15446	5.19467	5.22153e-20	1.06968e-18
ENSMUSG00000031586	19663	Rbpms	protein_coding	RNA binding protein gene with multiple splicing [Source:MGI Symbol;Acc:MGI:1334446]	6.78704	2.76278	2.45477	3.07079	5.57938e-20	1.13625e-18
ENSMUSG00000025355	58223	Mmp19	protein_coding	matrix metallopeptidase 19 [Source:MGI Symbol;Acc:MGI:1927899]	2.1604	1.1113	0.987322	1.23527	5.70196e-20	1.15611e-18
ENSMUSG00000018882	67036	Mrpl45	protein_coding	mitochondrial ribosomal protein L45 [Source:MGI Symbol;Acc:MGI:1914286]	2.43018	1.28106	1.1378	1.42433	6.18567e-20	1.25052e-18
ENSMUSG00000029490	243197	Mfsd7a	protein_coding	major facilitator superfamily domain containing 7A [Source:MGI Symbol;Acc:MGI:2442629]	5.2576	2.3944	2.1266	2.66221	6.20909e-20	1.25342e-18
ENSMUSG00000005413	15368	Hmox1	protein_coding	heme oxygenase 1 [Source:MGI Symbol;Acc:MGI:96163]	2.36259	1.24037	1.10124	1.3795	6.8361e-20	1.37198e-18
ENSMUSG00000039699	74481	Batf2	protein_coding	basic leucine zipper transcription factor, ATF-like 2 [Source:MGI Symbol;Acc:MGI:1921731]	3.47436	1.79675	1.59486	1.99863	7.23567e-20	1.43551e-18
ENSMUSG00000040339	329739	Fam102b	protein_coding	family with sequence similarity 102, member B [Source:MGI Symbol;Acc:MGI:3036259]	3.31137	1.72743	1.53129	1.92357	1.02392e-19	1.99138e-18
ENSMUSG00000029007	11610	Agtrap	protein_coding	angiotensin II, type I receptor-associated protein [Source:MGI Symbol;Acc:MGI:1339977]	2.24692	1.16795	1.03487	1.30103	1.1501e-19	2.22429e-18
ENSMUSG00000073557	329251	Ppp1r12b	protein_coding	protein phosphatase 1, regulatory subunit 12B [Source:MGI Symbol;Acc:MGI:1916417]	4.93321	2.30253	2.03974	2.56531	1.21337e-19	2.34337e-18
ENSMUSG00000033917	56209	Gde1	protein_coding	glycerophosphodiester phosphodiesterase 1 [Source:MGI Symbol;Acc:MGI:1891827]	2.01964	1.0141	0.89778	1.13042	1.43166e-19	2.73438e-18
ENSMUSG00000028367	22166	Txn1	protein_coding	thioredoxin 1 [Source:MGI Symbol;Acc:MGI:98874]	2.36186	1.23992	1.09755	1.3823	1.48382e-19	2.82231e-18
ENSMUSG00000031584	14782	Gsr	protein_coding	glutathione reductase [Source:MGI Symbol;Acc:MGI:95804]	2.6997	1.4328	1.26781	1.59779	1.62954e-19	3.07832e-18
ENSMUSG00000022876	67742	Samsn1	protein_coding	SAM domain, SH3 domain and nuclear localization signals, 1 [Source:MGI Symbol;Acc:MGI:1914992]	3.29473	1.72016	1.52174	1.91858	1.72398e-19	3.24343e-18
ENSMUSG00000021996	13885	Esd	protein_coding	esterase D/formylglutathione hydrolase [Source:MGI Symbol;Acc:MGI:95421]	2.13508	1.09429	0.968028	1.22055	1.73978e-19	3.26871e-18
ENSMUSG00000032724	99382	Abtb2	protein_coding	ankyrin repeat and BTB (POZ) domain containing 2 [Source:MGI Symbol;Acc:MGI:2139365]	17.0122	4.0885	3.61529	4.56171	1.92927e-19	3.60027e-18
ENSMUSG00000026581	20343	Sell	protein_coding	selectin, lymphocyte [Source:MGI Symbol;Acc:MGI:98279]	18.8193	4.23414	3.74091	4.72738	2.3857e-19	4.41626e-18
ENSMUSG00000070427	16068	Il18bp	protein_coding	interleukin 18 binding protein [Source:MGI Symbol;Acc:MGI:1333800]	3.13399	1.648	1.45571	1.8403	2.51897e-19	4.64431e-18
ENSMUSG00000005057	23921	Sh2b2	protein_coding	SH2B adaptor protein 2 [Source:MGI Symbol;Acc:MGI:1345171]	4.25308	2.08851	1.84415	2.33286	2.75363e-19	5.05674e-18
ENSMUSG00000056749	18030	Nfil3	protein_coding	nuclear factor, interleukin 3, regulated [Source:MGI Symbol;Acc:MGI:109495]	2.90052	1.53631	1.35646	1.71616	2.80704e-19	5.14116e-18
ENSMUSG00000023367	66058	Tmem176a	protein_coding	transmembrane protein 176A [Source:MGI Symbol;Acc:MGI:1913308]	2.34758	1.23118	1.0866	1.37575	3.10518e-19	5.67968e-18
ENSMUSG00000071350	239122	Setdb2	protein_coding	SET domain, bifurcated 2 [Source:MGI Symbol;Acc:MGI:2685139]	2.11477	1.0805	0.953343	1.20765	3.33425e-19	6.06659e-18
ENSMUSG00000010406	68836	Mrpl52	protein_coding	mitochondrial ribosomal protein L52 [Source:MGI Symbol;Acc:MGI:1916086]	3.9773	1.99179	1.75694	2.22663	3.54928e-19	6.43243e-18
ENSMUSG00000027508	94212	Pag1	protein_coding	phosphoprotein associated with glycosphingolipid microdomains 1 [Source:MGI Symbol;Acc:MGI:2443160]	2.21596	1.14793	1.01117	1.28469	4.98767e-19	8.8536e-18
ENSMUSG00000037759	19217	Ptger2	protein_coding	prostaglandin E receptor 2 (subtype EP2) [Source:MGI Symbol;Acc:MGI:97794]	4.08455	2.03018	1.78774	2.27262	5.39186e-19	9.51004e-18
ENSMUSG00000033307	17319	Mif	protein_coding	macrophage migration inhibitory factor (glycosylation-inhibiting factor) [Source:MGI Symbol;Acc:MGI:96982]	2.99713	1.58358	1.39442	1.77274	5.44066e-19	9.57168e-18
ENSMUSG00000028082	27059	Sh3d19	protein_coding	SH3 domain protein D19 [Source:MGI Symbol;Acc:MGI:1350923]	2.93673	1.55421	1.36816	1.74026	5.8315e-19	1.01816e-17
ENSMUSG00000079339	667373	Ifit1bl1	protein_coding	interferon induced protein with tetratricpeptide repeats 1B like 1 [Source:MGI Symbol;Acc:MGI:3650685]	6.41055	2.68045	2.35897	3.00193	6.21016e-19	1.08018e-17
ENSMUSG00000032965	73916	Ift57	protein_coding	intraflagellar transport 57 [Source:MGI Symbol;Acc:MGI:1921166]	2.93983	1.55574	1.36855	1.74292	6.89449e-19	1.18874e-17
ENSMUSG00000068246	71898	Apol9b	protein_coding	apolipoprotein L 9b [Source:MGI Symbol;Acc:MGI:1919148]	28.0579	4.81034	4.22817	5.39251	8.34634e-19	1.42838e-17
ENSMUSG00000036362	74191	P2ry13	protein_coding	purinergic receptor P2Y, G-protein coupled 13 [Source:MGI Symbol;Acc:MGI:1921441]	3.71812	1.89457	1.66504	2.12411	8.64192e-19	1.47531e-17
ENSMUSG00000050395	326623	Tnfsf15	protein_coding	tumor necrosis factor (ligand) superfamily, member 15 [Source:MGI Symbol;Acc:MGI:2180140]	9.13308	3.1911	2.80433	3.57787	8.75648e-19	1.49303e-17
ENSMUSG00000049488	329795	Tmem67	protein_coding	transmembrane protein 67 [Source:MGI Symbol;Acc:MGI:1923928]	2.44177	1.28793	1.13125	1.4446	9.86653e-19	1.67816e-17
ENSMUSG00000026829	227671	Gbgt1	protein_coding	globoside alpha-1,3-N-acetylgalactosaminyltransferase 1 [Source:MGI Symbol;Acc:MGI:2449143]	15.5156	3.95565	3.47388	4.43742	1.02622e-18	1.73905e-17
ENSMUSG00000059089	246256	Fcgr4	protein_coding	Fc receptor, IgG, low affinity IV [Source:MGI Symbol;Acc:MGI:2179523]	2.09789	1.06894	0.938118	1.19976	1.20176e-18	2.01674e-17
ENSMUSG00000023991	74123	Foxp4	protein_coding	forkhead box P4 [Source:MGI Symbol;Acc:MGI:1921373]	3.7852	1.92037	1.68486	2.15589	1.28589e-18	2.14491e-17
ENSMUSG00000024174	72836	Pot1b	protein_coding	protection of telomeres 1B [Source:MGI Symbol;Acc:MGI:1920086]	2.54528	1.34782	1.18226	1.51339	1.35522e-18	2.24701e-17
ENSMUSG00000009292	28240	Trpm2	protein_coding	transient receptor potential cation channel, subfamily M, member 2 [Source:MGI Symbol;Acc:MGI:1351901]	2.24915	1.16938	1.02514	1.31362	1.5501e-18	2.53666e-17
ENSMUSG00000028885	100340	Smpdl3b	protein_coding	sphingomyelin phosphodiesterase, acid-like 3B [Source:MGI Symbol;Acc:MGI:1916022]	14.3923	3.84722	3.37165	4.32279	1.66334e-18	2.70915e-17
ENSMUSG00000059743	110196	Fdps	protein_coding	farnesyl diphosphate synthetase [Source:MGI Symbol;Acc:MGI:104888]	2.98074	1.57567	1.3808	1.77054	1.69053e-18	2.7502e-17
ENSMUSG00000025324	11982	Atp10a	protein_coding	ATPase, class V, type 10A [Source:MGI Symbol;Acc:MGI:1330809]	2.63869	1.39982	1.22657	1.57307	1.73069e-18	2.81222e-17
ENSMUSG00000025791	72157	Pgm1	protein_coding	phosphoglucomutase 1 [Source:MGI Symbol;Acc:MGI:97565]	2.87421	1.52317	1.334	1.71233	1.93647e-18	3.11005e-17
ENSMUSG00000038527	232371	C1rl	protein_coding	complement component 1, r subcomponent-like [Source:MGI Symbol;Acc:MGI:2660692]	8.64895	3.11253	2.72514	3.49991	2.07546e-18	3.32169e-17
ENSMUSG00000053101	353346	Gpr141	protein_coding	G protein-coupled receptor 141 [Source:MGI Symbol;Acc:MGI:2672983]	8.43487	3.07637	2.69309	3.45964	2.14597e-18	3.42661e-17
ENSMUSG00000090231	14962	Cfb	protein_coding	complement factor B [Source:MGI Symbol;Acc:MGI:105975]	301.989	8.23835	7.20922	9.26748	2.3394e-18	3.71403e-17
ENSMUSG00000024778	14102	Fas	protein_coding	Fas (TNF receptor superfamily member 6) [Source:MGI Symbol;Acc:MGI:95484]	9.0567	3.17899	2.78148	3.57649	2.41543e-18	3.83034e-17
ENSMUSG00000026399	13136	Cd55	protein_coding	CD55 molecule, decay accelerating factor for complement [Source:MGI Symbol;Acc:MGI:104850]	17.1335	4.09874	3.58552	4.61197	2.52577e-18	4.00073e-17
ENSMUSG00000020085	71361	Aifm2	protein_coding	apoptosis-inducing factor, mitochondrion-associated 2 [Source:MGI Symbol;Acc:MGI:1918611]	2.10099	1.07107	0.936751	1.20539	2.65497e-18	4.17667e-17
ENSMUSG00000029082	12182	Bst1	protein_coding	bone marrow stromal cell antigen 1 [Source:MGI Symbol;Acc:MGI:105370]	25.2386	4.65756	4.07035	5.24477	3.15426e-18	4.95086e-17
ENSMUSG00000029822	71720	Osbpl3	protein_coding	oxysterol binding protein-like 3 [Source:MGI Symbol;Acc:MGI:1918970]	2.87005	1.52108	1.32895	1.71321	3.34851e-18	5.2498e-17
ENSMUSG00000074417	18730	Gm14548	protein_coding	predicted gene 14548 [Source:MGI Symbol;Acc:MGI:3709645]	2.21811	1.14933	1.00406	1.2946	3.41923e-18	5.34854e-17
ENSMUSG00000030156	12515	Cd69	protein_coding	CD69 antigen [Source:MGI Symbol;Acc:MGI:88343]	11.5254	3.52674	3.07988	3.9736	3.70487e-18	5.75629e-17
ENSMUSG00000054720	100604	Lrrc8c	protein_coding	leucine rich repeat containing 8 family, member C [Source:MGI Symbol;Acc:MGI:2140839]	2.16057	1.11141	0.970044	1.25277	4.19474e-18	6.45216e-17
ENSMUSG00000032501	211770	Trib1	protein_coding	tribbles pseudokinase 1 [Source:MGI Symbol;Acc:MGI:2443397]	2.4522	1.29408	1.1292	1.45895	4.42709e-18	6.77937e-17
ENSMUSG00000032802	76650	Srxn1	protein_coding	sulfiredoxin 1 homolog (S. cerevisiae) [Source:MGI Symbol;Acc:MGI:104971]	2.05748	1.04088	0.908189	1.17357	4.50847e-18	6.88874e-17
ENSMUSG00000049093	209590	Il23r	protein_coding	interleukin 23 receptor [Source:MGI Symbol;Acc:MGI:2181693]	293.158	8.19553	7.14626	9.24481	5.18149e-18	7.83913e-17
ENSMUSG00000026981	16181	Il1rn	protein_coding	interleukin 1 receptor antagonist [Source:MGI Symbol;Acc:MGI:96547]	3.21829	1.68629	1.46945	1.90313	5.9614e-18	8.96025e-17
ENSMUSG00000019850	21929	Tnfaip3	protein_coding	tumor necrosis factor, alpha-induced protein 3 [Source:MGI Symbol;Acc:MGI:1196377]	2.39087	1.25754	1.09548	1.41959	6.39309e-18	9.57786e-17
ENSMUSG00000027555	71934	Car13	protein_coding	carbonic anhydrase 13 [Source:MGI Symbol;Acc:MGI:1931322]	2.40849	1.26813	1.10414	1.43212	7.14489e-18	1.06926e-16
ENSMUSG00000023827	68262	Agpat4	protein_coding	1-acylglycerol-3-phosphate O-acyltransferase 4 (lysophosphatidic acid acyltransferase, delta) [Source:MGI Symbol;Acc:MGI:1915512]	2.88168	1.52691	1.32706	1.72676	1.0531e-17	1.55414e-16
ENSMUSG00000029223	22223	Uchl1	protein_coding	ubiquitin carboxy-terminal hydrolase L1 [Source:MGI Symbol;Acc:MGI:103149]	7.26468	2.8609	2.48575	3.23605	1.11759e-17	1.6423e-16
ENSMUSG00000028480	384009	Glipr2	protein_coding	GLI pathogenesis-related 2 [Source:MGI Symbol;Acc:MGI:1917770]	9.06002	3.17951	2.76186	3.59717	1.18166e-17	1.73461e-16
ENSMUSG00000040624	213783	Plekhg1	protein_coding	pleckstrin homology domain containing, family G (with RhoGef domain) member 1 [Source:MGI Symbol;Acc:MGI:2676551]	4.10265	2.03656	1.76895	2.30417	1.19467e-17	1.75e-16
ENSMUSG00000095028	668101	Sirpb1b	protein_coding	signal-regulatory protein beta 1B [Source:MGI Symbol;Acc:MGI:3779828]	7.51159	2.90912	2.52681	3.29143	1.19876e-17	1.75413e-16
ENSMUSG00000001467	13121	Cyp51	protein_coding	cytochrome P450, family 51 [Source:MGI Symbol;Acc:MGI:106040]	2.06217	1.04416	0.905689	1.18264	1.60287e-17	2.31604e-16
ENSMUSG00000063354	72027	Slc39a4	protein_coding	solute carrier family 39 (zinc transporter), member 4 [Source:MGI Symbol;Acc:MGI:1919277]	6.80519	2.76664	2.39924	3.13404	1.6737e-17	2.40582e-16
ENSMUSG00000025591	66282	Tma16	protein_coding	translation machinery associated 16 [Source:MGI Symbol;Acc:MGI:1913532]	7.06781	2.82126	2.44657	3.19596	1.68004e-17	2.41242e-16
ENSMUSG00000026946	64685	Nmi	protein_coding	N-myc (and STAT) interactor [Source:MGI Symbol;Acc:MGI:1928368]	2.08614	1.06083	0.918957	1.20271	2.09745e-17	2.97167e-16
ENSMUSG00000034926	74754	Dhcr24	protein_coding	24-dehydrocholesterol reductase [Source:MGI Symbol;Acc:MGI:1922004]	2.90854	1.54029	1.33424	1.74635	2.11683e-17	2.99606e-16
ENSMUSG00000035385	20296	Ccl2	protein_coding	chemokine (C-C motif) ligand 2 [Source:MGI Symbol;Acc:MGI:98259]	5.50949	2.46192	2.13082	2.79302	2.50487e-17	3.53442e-16
ENSMUSG00000036552	381062	Ermard	protein_coding	ER membrane associated RNA degradation [Source:MGI Symbol;Acc:MGI:1917317]	2.48723	1.31454	1.13729	1.49179	2.7226e-17	3.83382e-16
ENSMUSG00000030187	16633	Klra2	protein_coding	killer cell lectin-like receptor, subfamily A, member 2 [Source:MGI Symbol;Acc:MGI:101906]	35.9529	5.16803	4.46812	5.86795	3.12821e-17	4.36497e-16
ENSMUSG00000017390	11676	Aldoc	protein_coding	aldolase C, fructose-bisphosphate [Source:MGI Symbol;Acc:MGI:101863]	2.97563	1.57319	1.36006	1.78632	3.16188e-17	4.4075e-16
ENSMUSG00000051934	72572	Spats2	protein_coding	spermatogenesis associated, serine-rich 2 [Source:MGI Symbol;Acc:MGI:1919822]	2.35606	1.23638	1.06825	1.4045	3.56158e-17	4.94473e-16
ENSMUSG00000022707	74185	Gbe1	protein_coding	glucan (1,4-alpha-), branching enzyme 1 [Source:MGI Symbol;Acc:MGI:1921435]	2.6174	1.38813	1.1993	1.57696	3.59972e-17	4.99266e-16
ENSMUSG00000027276	16449	Jag1	protein_coding	jagged 1 [Source:MGI Symbol;Acc:MGI:1095416]	3.2887	1.71752	1.4831	1.95194	4.00326e-17	5.51915e-16
ENSMUSG00000050994	215772	Adgb	protein_coding	androglobin [Source:MGI Symbol;Acc:MGI:3605549]	11.9634	3.58055	3.08983	4.07128	4.56219e-17	6.24613e-16
ENSMUSG00000034855	15945	Cxcl10	protein_coding	chemokine (C-X-C motif) ligand 10 [Source:MGI Symbol;Acc:MGI:1352450]	5.23677	2.38868	2.06071	2.71664	4.83069e-17	6.59415e-16
ENSMUSG00000095788	320832	Sirpb1a	protein_coding	signal-regulatory protein beta 1A [Source:MGI Symbol;Acc:MGI:2444824]	11.7102	3.54969	3.0617	4.03769	5.03004e-17	6.85275e-16
ENSMUSG00000038668	14745	Lpar1	protein_coding	lysophosphatidic acid receptor 1 [Source:MGI Symbol;Acc:MGI:108429]	8.17155	3.03061	2.61394	3.44728	5.04257e-17	6.86305e-16
ENSMUSG00000074272	26365	Ceacam1	protein_coding	carcinoembryonic antigen-related cell adhesion molecule 1 [Source:MGI Symbol;Acc:MGI:1347245]	2.2498	1.1698	1.00892	1.33068	5.09475e-17	6.91366e-16
ENSMUSG00000045664	104252	Cdc42ep2	protein_coding	CDC42 effector protein (Rho GTPase binding) 2 [Source:MGI Symbol;Acc:MGI:1929744]	5.56253	2.47574	2.1352	2.81629	5.12053e-17	6.93503e-16
ENSMUSG00000024190	19252	Dusp1	protein_coding	dual specificity phosphatase 1 [Source:MGI Symbol;Acc:MGI:105120]	2.13237	1.09246	0.942128	1.24279	5.18427e-17	7.01449e-16
ENSMUSG00000052749	102640171	Trim30b	protein_coding	tripartite motif-containing 30B [Source:MGI Symbol;Acc:MGI:4821256]	3.34342	1.74133	1.50168	1.98098	5.20667e-17	7.03792e-16
ENSMUSG00000000957	17387	Mmp14	protein_coding	matrix metallopeptidase 14 (membrane-inserted) [Source:MGI Symbol;Acc:MGI:101900]	242.947	7.9245	6.83352	9.01548	5.26158e-17	7.10519e-16
ENSMUSG00000053318	74748	Slamf8	protein_coding	SLAM family member 8 [Source:MGI Symbol;Acc:MGI:1921998]	2.57661	1.36547	1.17713	1.55382	5.58602e-17	7.49937e-16
ENSMUSG00000024401	21926	Tnf	protein_coding	tumor necrosis factor [Source:MGI Symbol;Acc:MGI:104798]	3.63801	1.86315	1.60612	2.12018	5.61722e-17	7.53394e-16
ENSMUSG00000017737	17395	Mmp9	protein_coding	matrix metallopeptidase 9 [Source:MGI Symbol;Acc:MGI:97011]	10.6959	3.41898	2.94693	3.89103	5.76164e-17	7.69777e-16
ENSMUSG00000031490	13685	Eif4ebp1	protein_coding	eukaryotic translation initiation factor 4E binding protein 1 [Source:MGI Symbol;Acc:MGI:103267]	2.04684	1.0334	0.890655	1.17614	5.84608e-17	7.79553e-16
ENSMUSG00000035373	20306	Ccl7	protein_coding	chemokine (C-C motif) ligand 7 [Source:MGI Symbol;Acc:MGI:99512]	11.1005	3.47256	2.99225	3.95287	6.09841e-17	8.11635e-16
ENSMUSG00000047592	381680	Nxpe5	protein_coding	neurexophilin and PC-esterase domain family, member 5 [Source:MGI Symbol;Acc:MGI:3584036]	2.35583	1.23624	1.06478	1.40769	6.64263e-17	8.82366e-16
ENSMUSG00000003865	14936	Gys1	protein_coding	glycogen synthase 1, muscle [Source:MGI Symbol;Acc:MGI:101805]	2.97226	1.57156	1.35339	1.78973	6.84632e-17	9.0855e-16
ENSMUSG00000032515	215418	Csrnp1	protein_coding	cysteine-serine-rich nuclear protein 1 [Source:MGI Symbol;Acc:MGI:2387989]	2.28317	1.19104	1.0256	1.35647	6.96535e-17	9.21001e-16
ENSMUSG00000078616	NA	Trim30c	protein_coding	tripartite motif-containing 30C [Source:MGI Symbol;Acc:MGI:4821257]	2.11722	1.08217	0.931867	1.23248	6.95479e-17	9.21001e-16
ENSMUSG00000094796	625360	BC147527	protein_coding	cDNA sequence BC147527 [Source:MGI Symbol;Acc:MGI:4840510]	5.14729	2.36381	2.03198	2.69565	9.73084e-17	1.24938e-15
ENSMUSG00000063234	80910	Gpr84	protein_coding	G protein-coupled receptor 84 [Source:MGI Symbol;Acc:MGI:1934129]	18.7663	4.23007	3.6352	4.82494	1.02805e-16	1.31873e-15
ENSMUSG00000027611	19124	Procr	protein_coding	protein C receptor, endothelial [Source:MGI Symbol;Acc:MGI:104596]	19.7742	4.30555	3.69986	4.91124	1.03915e-16	1.32927e-15
ENSMUSG00000042190	14747	Cmklr1	protein_coding	chemokine-like receptor 1 [Source:MGI Symbol;Acc:MGI:109603]	2.44005	1.28691	1.10404	1.46978	1.42424e-16	1.7904e-15
ENSMUSG00000042622	17133	Maff	protein_coding	v-maf musculoaponeurotic fibrosarcoma oncogene family, protein F (avian) [Source:MGI Symbol;Acc:MGI:96910]	3.7252	1.89732	1.6272	2.16744	1.51194e-16	1.89376e-15
ENSMUSG00000039899	14190	Fgl2	protein_coding	fibrinogen-like protein 2 [Source:MGI Symbol;Acc:MGI:103266]	2.73013	1.44897	1.24174	1.6562	1.74331e-16	2.16202e-15
ENSMUSG00000025491	68713	Ifitm1	protein_coding	interferon induced transmembrane protein 1 [Source:MGI Symbol;Acc:MGI:1915963]	2.947	1.55925	1.336	1.78249	1.80373e-16	2.23208e-15
ENSMUSG00000042677	230738	Zc3h12a	protein_coding	zinc finger CCCH type containing 12A [Source:MGI Symbol;Acc:MGI:2385891]	2.07693	1.05445	0.903477	1.20542	1.80465e-16	2.23208e-15
ENSMUSG00000040918	116914	Slc19a2	protein_coding	solute carrier family 19 (thiamine transporter), member 2 [Source:MGI Symbol;Acc:MGI:1928761]	2.17882	1.12355	0.962142	1.28495	2.00357e-16	2.46929e-15
ENSMUSG00000037940	234515	Inpp4b	protein_coding	inositol polyphosphate-4-phosphatase, type II [Source:MGI Symbol;Acc:MGI:2158925]	2.33	1.22033	1.04476	1.3959	2.0997e-16	2.5808e-15
ENSMUSG00000027737	26570	Slc7a11	protein_coding	solute carrier family 7 (cationic amino acid transporter, y+ system), member 11 [Source:MGI Symbol;Acc:MGI:1347355]	14.4759	3.85558	3.29955	4.41162	2.26166e-16	2.77008e-15
ENSMUSG00000060594	244864	Layn	protein_coding	layilin [Source:MGI Symbol;Acc:MGI:2685357]	5.44068	2.44379	2.09068	2.79689	2.40001e-16	2.92915e-15
ENSMUSG00000048787	233805	Dcun1d3	protein_coding	DCN1, defective in cullin neddylation 1, domain containing 3 (S. cerevisiae) [Source:MGI Symbol;Acc:MGI:2679003]	2.16334	1.11326	0.952294	1.27422	2.45157e-16	2.98418e-15
ENSMUSG00000026980	17076	Ly75	protein_coding	lymphocyte antigen 75 [Source:MGI Symbol;Acc:MGI:106662]	34.7518	5.11902	4.37858	5.85945	2.48088e-16	3.01455e-15
ENSMUSG00000050212	230752	Eva1b	protein_coding	eva-1 homolog B (C. elegans) [Source:MGI Symbol;Acc:MGI:1922063]	2.54111	1.34546	1.15044	1.54048	2.64752e-16	3.19737e-15
ENSMUSG00000021639	23894	Gtf2h2	protein_coding	general transcription factor II H, polypeptide 2 [Source:MGI Symbol;Acc:MGI:1345669]	2.19332	1.13312	0.968607	1.29763	2.78613e-16	3.35305e-15
ENSMUSG00000079363	17472	Gbp4	protein_coding	guanylate binding protein 4 [Source:MGI Symbol;Acc:MGI:97072]	5.99213	2.58307	2.20772	2.95842	2.86242e-16	3.44188e-15
ENSMUSG00000074419	100041146	Gm15448	protein_coding	predicted gene 15448 [Source:MGI Symbol;Acc:MGI:3705216]	2.70305	1.43459	1.22607	1.6431	2.88542e-16	3.46651e-15
ENSMUSG00000049422	103172	Chchd10	protein_coding	coiled-coil-helix-coiled-coil-helix domain containing 10 [Source:MGI Symbol;Acc:MGI:2143558]	3.06845	1.61751	1.38194	1.85308	3.07073e-16	3.67319e-15
ENSMUSG00000030148	26888	Clec4a2	protein_coding	C-type lectin domain family 4, member a2 [Source:MGI Symbol;Acc:MGI:1349412]	2.44193	1.28802	1.10036	1.47568	3.10971e-16	3.71019e-15
ENSMUSG00000033871	170826	Ppargc1b	protein_coding	peroxisome proliferative activated receptor, gamma, coactivator 1 beta [Source:MGI Symbol;Acc:MGI:2444934]	3.23926	1.69566	1.44819	1.94314	3.27906e-16	3.89878e-15
ENSMUSG00000068417	667034	Pnp2	protein_coding	purine-nucleoside phosphorylase 2 [Source:MGI Symbol;Acc:MGI:3712328]	3.58338	1.84132	1.57251	2.11013	3.30831e-16	3.92683e-15
ENSMUSG00000030109	14411	Slc6a12	protein_coding	solute carrier family 6 (neurotransmitter transporter, betaine/GABA), member 12 [Source:MGI Symbol;Acc:MGI:95628]	11.373	3.50754	2.98924	4.02585	4.81722e-16	5.57426e-15
ENSMUSG00000035352	20293	Ccl12	protein_coding	chemokine (C-C motif) ligand 12 [Source:MGI Symbol;Acc:MGI:108224]	14.2391	3.83178	3.26338	4.40018	5.42638e-16	6.21159e-15
ENSMUSG00000080316	75202	Spaca6	protein_coding	sperm acrosome associated 6 [Source:MGI Symbol;Acc:MGI:1922452]	2.79179	1.48119	1.26076	1.70162	5.99618e-16	6.82992e-15
ENSMUSG00000029752	27053	Asns	protein_coding	asparagine synthetase [Source:MGI Symbol;Acc:MGI:1350929]	2.5452	1.34778	1.1458	1.54976	7.43322e-16	8.37024e-15
ENSMUSG00000035678	21950	Tnfsf9	protein_coding	tumor necrosis factor (ligand) superfamily, member 9 [Source:MGI Symbol;Acc:MGI:1101058]	3.96337	1.98673	1.68809	2.28537	8.16787e-16	9.14537e-15
ENSMUSG00000029059	66469	Fam213b	protein_coding	family with sequence similarity 213, member B [Source:MGI Symbol;Acc:MGI:1913719]	2.05643	1.04014	0.883482	1.1968	8.67682e-16	9.66825e-15
ENSMUSG00000070501	545384	Ifi214	protein_coding	interferon activated gene 214 [Source:MGI Symbol;Acc:MGI:3584522]	3.6415	1.86454	1.58343	2.14564	8.94636e-16	9.9286e-15
ENSMUSG00000078566	12176	Bnip3	protein_coding	BCL2/adenovirus E1B interacting protein 3 [Source:MGI Symbol;Acc:MGI:109326]	4.16339	2.05776	1.74691	2.36861	9.50581e-16	1.04933e-14
ENSMUSG00000060675	225845	Pla2g16	protein_coding	phospholipase A2, group XVI [Source:MGI Symbol;Acc:MGI:2179715]	2.59558	1.37606	1.1676	1.58452	1.03717e-15	1.14006e-14
ENSMUSG00000039081	218820	Zfp503	protein_coding	zinc finger protein 503 [Source:MGI Symbol;Acc:MGI:1353644]	3.24858	1.69981	1.44185	1.95777	1.09533e-15	1.20113e-14
ENSMUSG00000029442	269701	Wdr66	protein_coding	WD repeat domain 66 [Source:MGI Symbol;Acc:MGI:1918495]	11.2	3.48542	2.95395	4.01689	1.26716e-15	1.37646e-14
ENSMUSG00000002992	11813	Apoc2	protein_coding	apolipoprotein C-II [Source:MGI Symbol;Acc:MGI:88054]	2.11884	1.08328	0.917635	1.24892	1.37972e-15	1.49286e-14
ENSMUSG00000020108	74747	Ddit4	protein_coding	DNA-damage-inducible transcript 4 [Source:MGI Symbol;Acc:MGI:1921997]	3.69997	1.88751	1.5988	2.17622	1.39355e-15	1.50665e-14
ENSMUSG00000038811	14710	Gngt2	protein_coding	guanine nucleotide binding protein (G protein), gamma transducing activity polypeptide 2 [Source:MGI Symbol;Acc:MGI:893584]	2.24361	1.16582	0.987332	1.34431	1.43466e-15	1.54626e-14
ENSMUSG00000020592	20969	Sdc1	protein_coding	syndecan 1 [Source:MGI Symbol;Acc:MGI:1349162]	4.14196	2.05031	1.73577	2.36486	1.52665e-15	1.63835e-14
ENSMUSG00000051379	71436	Flrt3	protein_coding	fibronectin leucine rich transmembrane protein 3 [Source:MGI Symbol;Acc:MGI:1918686]	51.8726	5.6969	4.82249	6.57131	1.54973e-15	1.65993e-14
ENSMUSG00000045502	80885	Hcar2	protein_coding	hydroxycarboxylic acid receptor 2 [Source:MGI Symbol;Acc:MGI:1933383]	6.1709	2.62548	2.21968	3.03128	1.91643e-15	2.02757e-14
ENSMUSG00000044674	14362	Fzd1	protein_coding	frizzled class receptor 1 [Source:MGI Symbol;Acc:MGI:1196625]	5.35102	2.41981	2.04514	2.79448	2.02259e-15	2.13336e-14
ENSMUSG00000057346	223672	Apol9a	protein_coding	apolipoprotein L 9a [Source:MGI Symbol;Acc:MGI:3606001]	32.1431	5.00644	4.23093	5.78194	2.04946e-15	2.16006e-14
ENSMUSG00000018459	114644	Slc13a3	protein_coding	solute carrier family 13 (sodium-dependent dicarboxylate transporter), member 3 [Source:MGI Symbol;Acc:MGI:2149635]	38.0786	5.25091	4.43574	6.06608	2.19174e-15	2.30299e-14
ENSMUSG00000073418	12268	C4b	protein_coding	complement component 4B (Chido blood group) [Source:MGI Symbol;Acc:MGI:88228]	5.23178	2.3873	2.01608	2.75853	2.30451e-15	2.41415e-14
ENSMUSG00000030203	70686	Dusp16	protein_coding	dual specificity phosphatase 16 [Source:MGI Symbol;Acc:MGI:1917936]	2.2646	1.17925	0.995548	1.36296	2.43526e-15	2.54149e-14
ENSMUSG00000026088	69028	Mitd1	protein_coding	MIT, microtubule interacting and transport, domain containing 1 [Source:MGI Symbol;Acc:MGI:1916278]	2.0736	1.05214	0.887419	1.21686	2.83196e-15	2.93996e-14
ENSMUSG00000022534	54483	Mefv	protein_coding	Mediterranean fever [Source:MGI Symbol;Acc:MGI:1859396]	16.276	4.02468	3.39224	4.65711	3.16994e-15	3.27608e-14
ENSMUSG00000009376	17295	Met	protein_coding	met proto-oncogene [Source:MGI Symbol;Acc:MGI:96969]	11.4639	3.51902	2.96533	4.07271	3.29599e-15	3.3962e-14
ENSMUSG00000033420	69538	Antxr1	protein_coding	anthrax toxin receptor 1 [Source:MGI Symbol;Acc:MGI:1916788]	4.8204	2.26915	1.91063	2.62768	3.73997e-15	3.83084e-14
ENSMUSG00000027222	18633	Pex16	protein_coding	peroxisomal biogenesis factor 16 [Source:MGI Symbol;Acc:MGI:1338829]	2.40989	1.26897	1.06824	1.4697	3.87502e-15	3.96623e-14
ENSMUSG00000005800	17394	Mmp8	protein_coding	matrix metallopeptidase 8 [Source:MGI Symbol;Acc:MGI:1202395]	35.0913	5.13304	4.31734	5.94875	4.45092e-15	4.52554e-14
ENSMUSG00000028517	67916	Plpp3	protein_coding	phospholipid phosphatase 3 [Source:MGI Symbol;Acc:MGI:1915166]	3.19291	1.67487	1.40748	1.94226	5.11758e-15	5.16917e-14
ENSMUSG00000003032	16600	Klf4	protein_coding	Kruppel-like factor 4 (gut) [Source:MGI Symbol;Acc:MGI:1342287]	2.34687	1.23074	1.03408	1.42739	5.25183e-15	5.3009e-14
ENSMUSG00000020415	30939	Pttg1	protein_coding	pituitary tumor-transforming gene 1 [Source:MGI Symbol;Acc:MGI:1353578]	2.02411	1.01728	0.854643	1.17992	5.34326e-15	5.38532e-14
ENSMUSG00000078502	433801	Gm13212	protein_coding	predicted gene 13212 [Source:MGI Symbol;Acc:MGI:3651014]	2.60777	1.38281	1.16013	1.6055	6.6445e-15	6.62916e-14
ENSMUSG00000028583	14726	Pdpn	protein_coding	podoplanin [Source:MGI Symbol;Acc:MGI:103098]	9.00149	3.17016	2.65543	3.6849	8.50105e-15	8.37269e-14
ENSMUSG00000040675	270685	Mthfd1l	protein_coding	methylenetetrahydrofolate dehydrogenase (NADP+ dependent) 1-like [Source:MGI Symbol;Acc:MGI:1924836]	2.89764	1.53488	1.28564	1.78412	8.53097e-15	8.39617e-14
ENSMUSG00000027347	19419	Rasgrp1	protein_coding	RAS guanyl releasing protein 1 [Source:MGI Symbol;Acc:MGI:1314635]	167.97	7.39206	6.18603	8.5981	9.82158e-15	9.61847e-14
ENSMUSG00000021125	11847	Arg2	protein_coding	arginase type II [Source:MGI Symbol;Acc:MGI:1330806]	22.3412	4.48163	3.74741	5.21586	1.11173e-14	1.08185e-13
ENSMUSG00000032715	228775	Trib3	protein_coding	tribbles pseudokinase 3 [Source:MGI Symbol;Acc:MGI:1345675]	5.79765	2.53547	2.11901	2.95193	1.20058e-14	1.16095e-13
ENSMUSG00000021360	14538	Gcnt2	protein_coding	glucosaminyl (N-acetyl) transferase 2, I-branching enzyme [Source:MGI Symbol;Acc:MGI:1100870]	5.22359	2.38504	1.99059	2.77949	1.47291e-14	1.41244e-13
ENSMUSG00000056290	60361	Ms4a4b	protein_coding	membrane-spanning 4-domains, subfamily A, member 4B [Source:MGI Symbol;Acc:MGI:1913083]	3.57437	1.83769	1.53278	2.1426	1.62169e-14	1.54547e-13
ENSMUSG00000068129	13011	Cst7	protein_coding	cystatin F (leukocystatin) [Source:MGI Symbol;Acc:MGI:1298217]	3.50716	1.81031	1.50977	2.11084	1.64944e-14	1.57083e-13
ENSMUSG00000063611	NA	Gm10134	protein_coding	predicted gene 10134 [Source:MGI Symbol;Acc:MGI:3642322]	13.874	3.79431	3.1643	4.42433	1.65721e-14	1.57714e-13
ENSMUSG00000058427	20310	Cxcl2	protein_coding	chemokine (C-X-C motif) ligand 2 [Source:MGI Symbol;Acc:MGI:1340094]	44.3799	5.47183	4.56235	6.38132	1.70852e-14	1.62263e-13
ENSMUSG00000090877	15511	Hspa1b	protein_coding	heat shock protein 1B [Source:MGI Symbol;Acc:MGI:99517]	5.67855	2.50552	2.08835	2.92269	1.79893e-14	1.70148e-13
ENSMUSG00000024378	170459	Stard4	protein_coding	StAR-related lipid transfer (START) domain containing 4 [Source:MGI Symbol;Acc:MGI:2156764]	2.04945	1.03524	0.86216	1.20832	2.03226e-14	1.91561e-13
ENSMUSG00000026580	20344	Selp	protein_coding	selectin, platelet [Source:MGI Symbol;Acc:MGI:98280]	21.8003	4.44628	3.70107	5.19148	2.1869e-14	2.05298e-13
ENSMUSG00000029373	56744	Pf4	protein_coding	platelet factor 4 [Source:MGI Symbol;Acc:MGI:1888711]	3.1052	1.63468	1.35781	1.91156	2.98633e-14	2.7622e-13
ENSMUSG00000030474	83382	Siglece	protein_coding	sialic acid binding Ig-like lectin E [Source:MGI Symbol;Acc:MGI:1932475]	34.0183	5.08824	4.22576	5.95072	3.05266e-14	2.82167e-13
ENSMUSG00000030427	18726	Lilra6	protein_coding	leukocyte immunoglobulin-like receptor, subfamily A (with TM domain), member 6 [Source:MGI Symbol;Acc:MGI:1195969]	2.16571	1.11484	0.925541	1.30414	3.21255e-14	2.96155e-13
ENSMUSG00000038521	50908	C1s1	protein_coding	complement component 1, s subcomponent 1 [Source:MGI Symbol;Acc:MGI:1355312]	62.7627	5.97183	4.94992	6.99375	4.03671e-14	3.68933e-13
ENSMUSG00000002997	19088	Prkar2b	protein_coding	protein kinase, cAMP dependent regulatory, type II beta [Source:MGI Symbol;Acc:MGI:97760]	2.33027	1.2205	1.01089	1.43011	4.48867e-14	4.07547e-13
ENSMUSG00000025804	12768	Ccr1	protein_coding	chemokine (C-C motif) receptor 1 [Source:MGI Symbol;Acc:MGI:104618]	4.78527	2.2586	1.86951	2.6477	4.91297e-14	4.4374e-13
ENSMUSG00000030402	232941	Ppm1n	protein_coding	protein phosphatase, Mg2+/Mn2+ dependent, 1N (putative) [Source:MGI Symbol;Acc:MGI:2142330]	36.9199	5.20633	4.30553	6.10712	5.57663e-14	5.00972e-13
ENSMUSG00000050931	74442	Sgms2	protein_coding	sphingomyelin synthase 2 [Source:MGI Symbol;Acc:MGI:1921692]	6.76215	2.75748	2.28021	3.23476	5.63678e-14	5.05155e-13
ENSMUSG00000027605	60525	Acss2	protein_coding	acyl-CoA synthetase short-chain family member 2 [Source:MGI Symbol;Acc:MGI:1890410]	2.049	1.03492	0.855557	1.21428	5.85641e-14	5.24158e-13
ENSMUSG00000013974	69189	Mcemp1	protein_coding	mast cell expressed membrane protein 1 [Source:MGI Symbol;Acc:MGI:1916439]	97.9342	6.61374	5.46622	7.76126	6.05319e-14	5.4072e-13
ENSMUSG00000026579	14067	F5	protein_coding	coagulation factor V [Source:MGI Symbol;Acc:MGI:88382]	19.2546	4.26713	3.5267	5.00757	6.0682e-14	5.41711e-13
ENSMUSG00000037126	73728	Psd	protein_coding	pleckstrin and Sec7 domain containing [Source:MGI Symbol;Acc:MGI:1920978]	2.29335	1.19746	0.989317	1.4056	6.37948e-14	5.68399e-13
ENSMUSG00000031444	14058	F10	protein_coding	coagulation factor X [Source:MGI Symbol;Acc:MGI:103107]	9.60291	3.26347	2.6962	3.83074	6.38526e-14	5.68548e-13
ENSMUSG00000031762	17750	Mt2	protein_coding	metallothionein 2 [Source:MGI Symbol;Acc:MGI:97172]	3.13056	1.64642	1.35873	1.93411	7.43537e-14	6.57393e-13
ENSMUSG00000024238	21417	Zeb1	protein_coding	zinc finger E-box binding homeobox 1 [Source:MGI Symbol;Acc:MGI:1344313]	2.51448	1.33026	1.09779	1.56273	7.46394e-14	6.59497e-13
ENSMUSG00000042498	102871	D330045A20Rik	protein_coding	RIKEN cDNA D330045A20 gene [Source:MGI Symbol;Acc:MGI:2147848]	6.68092	2.74005	2.25855	3.22155	8.76676e-14	7.67743e-13
ENSMUSG00000032024	71566	Clmp	protein_coding	CXADR-like membrane protein [Source:MGI Symbol;Acc:MGI:1918816]	6.97591	2.80238	2.30941	3.29536	9.0401e-14	7.9068e-13
ENSMUSG00000027204	14118	Fbn1	protein_coding	fibrillin 1 [Source:MGI Symbol;Acc:MGI:95489]	5.93257	2.56866	2.11631	3.021	9.32649e-14	8.14103e-13
ENSMUSG00000049608	227326	Gpr55	protein_coding	G protein-coupled receptor 55 [Source:MGI Symbol;Acc:MGI:2685064]	49.1781	5.61994	4.62849	6.61139	9.82181e-14	8.54726e-13
ENSMUSG00000024924	22359	Vldlr	protein_coding	very low density lipoprotein receptor [Source:MGI Symbol;Acc:MGI:98935]	14.7764	3.88522	3.19895	4.57149	1.01822e-13	8.84417e-13
ENSMUSG00000020334	30805	Slc22a4	protein_coding	solute carrier family 22 (organic cation transporter), member 4 [Source:MGI Symbol;Acc:MGI:1353479]	4.02628	2.00945	1.65412	2.36477	1.05066e-13	9.09174e-13
ENSMUSG00000036867	17130	Smad6	protein_coding	SMAD family member 6 [Source:MGI Symbol;Acc:MGI:1336883]	8.99782	3.16958	2.60887	3.73028	1.06345e-13	9.19665e-13
ENSMUSG00000032915	52614	Adgre4	protein_coding	adhesion G protein-coupled receptor E4 [Source:MGI Symbol;Acc:MGI:1196464]	12.9753	3.6977	3.04224	4.35317	1.12821e-13	9.73227e-13
ENSMUSG00000021575	11624	Ahrr	protein_coding	aryl-hydrocarbon receptor repressor [Source:MGI Symbol;Acc:MGI:1333776]	2.25175	1.17104	0.962887	1.3792	1.22217e-13	1.0497e-12
ENSMUSG00000040260	76441	Daam2	protein_coding	dishevelled associated activator of morphogenesis 2 [Source:MGI Symbol;Acc:MGI:1923691]	2.31917	1.21361	0.997643	1.42957	1.26224e-13	1.08142e-12
ENSMUSG00000036206	98402	Sh3bp4	protein_coding	SH3-domain binding protein 4 [Source:MGI Symbol;Acc:MGI:2138297]	2.40554	1.26636	1.03972	1.49301	1.48861e-13	1.26208e-12
ENSMUSG00000024892	18563	Pcx	protein_coding	pyruvate carboxylase [Source:MGI Symbol;Acc:MGI:97520]	2.39334	1.25903	1.03309	1.48497	1.60878e-13	1.35813e-12
ENSMUSG00000078453	73112	Abracl	protein_coding	ABRA C-terminal like [Source:MGI Symbol;Acc:MGI:1920362]	2.17837	1.12325	0.92097	1.32553	1.7791e-13	1.4928e-12
ENSMUSG00000008193	272382	Spib	protein_coding	Spi-B transcription factor (Spi-1/PU.1 related) [Source:MGI Symbol;Acc:MGI:892986]	59.6102	5.89749	4.83488	6.96009	1.80622e-13	1.51464e-12
ENSMUSG00000045827	20723	Serpinb9	protein_coding	serine (or cysteine) peptidase inhibitor, clade B, member 9 [Source:MGI Symbol;Acc:MGI:106603]	2.43225	1.28229	1.05114	1.51344	1.83015e-13	1.53285e-12
ENSMUSG00000055632	665700	Hmcn2	protein_coding	hemicentin 2 [Source:MGI Symbol;Acc:MGI:2677838]	12.4326	3.63605	2.9781	4.294	2.04239e-13	1.69725e-12
ENSMUSG00000016283	14990	H2-M2	protein_coding	histocompatibility 2, M region locus 2 [Source:MGI Symbol;Acc:MGI:95914]	110.166	6.78354	5.55359	8.01349	2.16256e-13	1.78958e-12
ENSMUSG00000033227	22420	Wnt6	protein_coding	wingless-type MMTV integration site family, member 6 [Source:MGI Symbol;Acc:MGI:98960]	23.5863	4.55988	3.72931	5.39045	2.466e-13	2.02613e-12
ENSMUSG00000053338	245126	Tarm1	protein_coding	T cell-interacting, activating receptor on myeloid cells 1 [Source:MGI Symbol;Acc:MGI:2442280]	169.895	7.4085	6.05856	8.75844	2.49246e-13	2.04545e-12
ENSMUSG00000028680	12795	Plk3	protein_coding	polo like kinase 3 [Source:MGI Symbol;Acc:MGI:109604]	3.3969	1.76422	1.44131	2.08713	2.83233e-13	2.31611e-12
ENSMUSG00000079418	666468	Atg4a	protein_coding	autophagy related 4A, cysteine peptidase [Source:MGI Symbol;Acc:MGI:2147903]	2.09209	1.06495	0.869935	1.25996	2.8708e-13	2.34341e-12
ENSMUSG00000044813	230126	Shb	protein_coding	src homology 2 domain-containing transforming protein B [Source:MGI Symbol;Acc:MGI:98294]	2.20795	1.14271	0.933258	1.35216	2.9498e-13	2.40506e-12
ENSMUSG00000006342	71733	Susd2	protein_coding	sushi domain containing 2 [Source:MGI Symbol;Acc:MGI:1918983]	41.4021	5.37163	4.37637	6.36689	4.00914e-13	3.22316e-12
ENSMUSG00000050737	64292	Ptges	protein_coding	prostaglandin E synthase [Source:MGI Symbol;Acc:MGI:1927593]	33.2269	5.05428	4.117	5.99155	4.10922e-13	3.29979e-12
ENSMUSG00000028527	11639	Ak4	protein_coding	adenylate kinase 4 [Source:MGI Symbol;Acc:MGI:87979]	23.7583	4.57036	3.72282	5.41789	4.10923e-13	3.29979e-12
ENSMUSG00000098470	667277	C1rb	protein_coding	complement component 1, r subcomponent B [Source:MGI Symbol;Acc:MGI:3779804]	6.76538	2.75817	2.24571	3.27063	4.33913e-13	3.47432e-12
ENSMUSG00000091144	628705	Phf11c	protein_coding	PHD finger protein 11C [Source:MGI Symbol;Acc:MGI:3648476]	2.50285	1.32357	1.07725	1.5699	4.54616e-13	3.62958e-12
ENSMUSG00000071454	13528	Dtnb	protein_coding	dystrobrevin, beta [Source:MGI Symbol;Acc:MGI:1203728]	3.15597	1.65808	1.34669	1.96948	5.87733e-13	4.60986e-12
ENSMUSG00000017652	21939	Cd40	protein_coding	CD40 antigen [Source:MGI Symbol;Acc:MGI:88336]	2.35788	1.23749	1.00476	1.47023	6.11771e-13	4.78753e-12
ENSMUSG00000025746	16193	Il6	protein_coding	interleukin 6 [Source:MGI Symbol;Acc:MGI:96559]	78.0005	6.28541	5.09604	7.47478	7.26958e-13	5.63158e-12
ENSMUSG00000078780	381484	Gm5150	protein_coding	predicted gene 5150 [Source:MGI Symbol;Acc:MGI:3779469]	9.25142	3.20967	2.5985	3.82085	8.66707e-13	6.66564e-12
ENSMUSG00000004151	14009	Etv1	protein_coding	ets variant 1 [Source:MGI Symbol;Acc:MGI:99254]	2.47577	1.30788	1.05878	1.55698	8.72586e-13	6.70713e-12
ENSMUSG00000045094	328967	Arhgef37	protein_coding	Rho guanine nucleotide exchange factor (GEF) 37 [Source:MGI Symbol;Acc:MGI:3045339]	13.174	3.71962	3.0098	4.42944	9.2118e-13	7.06827e-12
ENSMUSG00000018500	11541	Adora2b	protein_coding	adenosine A2b receptor [Source:MGI Symbol;Acc:MGI:99403]	3.75473	1.90871	1.54424	2.27317	9.37184e-13	7.17177e-12
ENSMUSG00000029322	231507	Plac8	protein_coding	placenta-specific 8 [Source:MGI Symbol;Acc:MGI:2445289]	28.1454	4.81482	3.89509	5.73456	9.472e-13	7.2444e-12
ENSMUSG00000048924	76041	Ccdc125	protein_coding	coiled-coil domain containing 125 [Source:MGI Symbol;Acc:MGI:1923291]	2.51152	1.32856	1.07455	1.58257	9.70996e-13	7.4182e-12
ENSMUSG00000074115	20208	Saa1	protein_coding	serum amyloid A 1 [Source:MGI Symbol;Acc:MGI:98221]	161.507	7.33545	5.9294	8.7415	1.0427e-12	7.9397e-12
ENSMUSG00000030930	100502937	Chst15	protein_coding	carbohydrate sulfotransferase 15 [Source:MGI Symbol;Acc:MGI:1924840]	2.34578	1.23006	0.993142	1.46699	1.1937e-12	9.00514e-12
ENSMUSG00000042265	58217	Trem1	protein_coding	triggering receptor expressed on myeloid cells 1 [Source:MGI Symbol;Acc:MGI:1930005]	51.8975	5.69759	4.59969	6.7955	1.2086e-12	9.10767e-12
ENSMUSG00000078922	21822	Tgtp1	protein_coding	T cell specific GTPase 1 [Source:MGI Symbol;Acc:MGI:98734]	3.31349	1.72835	1.39469	2.06201	1.27203e-12	9.5596e-12
ENSMUSG00000039891	378431	Txlnb	protein_coding	taxilin beta [Source:MGI Symbol;Acc:MGI:2671945]	8.29819	3.0528	2.45817	3.64743	1.63005e-12	1.2138e-11
ENSMUSG00000028214	14579	Gem	protein_coding	GTP binding protein (gene overexpressed in skeletal muscle) [Source:MGI Symbol;Acc:MGI:99844]	20.7374	4.37416	3.52195	5.22638	1.6409e-12	1.22123e-11
ENSMUSG00000030108	14412	Slc6a13	protein_coding	solute carrier family 6 (neurotransmitter transporter, GABA), member 13 [Source:MGI Symbol;Acc:MGI:95629]	26.5608	4.73123	3.80893	5.65353	1.6669e-12	1.23924e-11
ENSMUSG00000026822	16819	Lcn2	protein_coding	lipocalin 2 [Source:MGI Symbol;Acc:MGI:96757]	1009.75	9.97978	8.03156	11.928	1.73386e-12	1.28488e-11
ENSMUSG00000022586	57248	Ly6i	protein_coding	lymphocyte antigen 6 complex, locus I [Source:MGI Symbol;Acc:MGI:1888480]	43.5905	5.44594	4.3814	6.51048	1.79844e-12	1.33131e-11
ENSMUSG00000042766	360213	Trim46	protein_coding	tripartite motif-containing 46 [Source:MGI Symbol;Acc:MGI:2673000]	3.82494	1.93544	1.55469	2.31618	2.14467e-12	1.57246e-11
ENSMUSG00000023903	240047	Mmp25	protein_coding	matrix metallopeptidase 25 [Source:MGI Symbol;Acc:MGI:2443938]	6.24775	2.64334	2.12249	3.16418	2.24145e-12	1.64081e-11
ENSMUSG00000031740	17390	Mmp2	protein_coding	matrix metallopeptidase 2 [Source:MGI Symbol;Acc:MGI:97009]	7.75086	2.95436	2.36815	3.54056	2.71674e-12	1.96893e-11
ENSMUSG00000000791	16161	Il12rb1	protein_coding	interleukin 12 receptor, beta 1 [Source:MGI Symbol;Acc:MGI:104579]	4.94125	2.30488	1.84694	2.76281	2.81659e-12	2.03808e-11
ENSMUSG00000041324	16323	Inhba	protein_coding	inhibin beta-A [Source:MGI Symbol;Acc:MGI:96570]	44.398	5.47242	4.37881	6.56603	3.30255e-12	2.36865e-11
ENSMUSG00000058258	319554	Idi1	protein_coding	isopentenyl-diphosphate delta isomerase [Source:MGI Symbol;Acc:MGI:2442264]	3.60146	1.84858	1.47901	2.21815	3.33881e-12	2.3897e-11
ENSMUSG00000001249	15451	Hpn	protein_coding	hepsin [Source:MGI Symbol;Acc:MGI:1196620]	2.38799	1.25579	1.00353	1.50806	3.80662e-12	2.70077e-11
ENSMUSG00000033213	433470	AA467197	protein_coding	expressed sequence AA467197 [Source:MGI Symbol;Acc:MGI:3034182]	6.57178	2.71629	2.17032	3.26225	3.86608e-12	2.73733e-11
ENSMUSG00000024769	240505	Cdc42bpg	protein_coding	CDC42 binding protein kinase gamma (DMPK-like) [Source:MGI Symbol;Acc:MGI:2652845]	2.01232	1.00886	0.805629	1.21209	4.10768e-12	2.89653e-11
ENSMUSG00000068744	56742	Psrc1	protein_coding	proline/serine-rich coiled-coil 1 [Source:MGI Symbol;Acc:MGI:1913099]	2.37396	1.2473	0.994392	1.5002	4.90547e-12	3.42763e-11
ENSMUSG00000030401	20167	Rtn2	protein_coding	reticulon 2 (Z-band associated protein) [Source:MGI Symbol;Acc:MGI:107612]	4.94659	2.30644	1.83795	2.77492	5.14629e-12	3.58684e-11
ENSMUSG00000063458	76633	Lrmda	protein_coding	leucine rich melanocyte differentiation associated [Source:MGI Symbol;Acc:MGI:1923883]	2.01863	1.01337	0.807508	1.21924	5.16632e-12	3.59717e-11
ENSMUSG00000034488	13612	Edil3	protein_coding	EGF-like repeats and discoidin I-like domains 3 [Source:MGI Symbol;Acc:MGI:1329025]	2.91786	1.54491	1.23072	1.85911	5.32426e-12	3.69784e-11
ENSMUSG00000026675	15490	Hsd17b7	protein_coding	hydroxysteroid (17-beta) dehydrogenase 7 [Source:MGI Symbol;Acc:MGI:1330808]	2.87388	1.523	1.21301	1.83299	5.44419e-12	3.77544e-11
ENSMUSG00000029380	14825	Cxcl1	protein_coding	chemokine (C-X-C motif) ligand 1 [Source:MGI Symbol;Acc:MGI:108068]	44.3517	5.47092	4.3555	6.58633	5.69483e-12	3.92954e-11
ENSMUSG00000028076	12479	Cd1d1	protein_coding	CD1d1 antigen [Source:MGI Symbol;Acc:MGI:107674]	3.01554	1.59242	1.26601	1.91883	6.58277e-12	4.5085e-11
ENSMUSG00000029379	330122	Cxcl3	protein_coding	chemokine (C-X-C motif) ligand 3 [Source:MGI Symbol;Acc:MGI:3037818]	241.864	7.91805	6.28884	9.54726	7.29543e-12	4.96707e-11
ENSMUSG00000052270	14289	Fpr2	protein_coding	formyl peptide receptor 2 [Source:MGI Symbol;Acc:MGI:1278319]	124.293	6.9576	5.51748	8.39772	8.56088e-12	5.78309e-11
ENSMUSG00000024899	23972	Papss2	protein_coding	3'-phosphoadenosine 5'-phosphosulfate synthase 2 [Source:MGI Symbol;Acc:MGI:1330223]	2.31302	1.20978	0.958665	1.46088	9.23084e-12	6.21442e-11
ENSMUSG00000020642	108089	Rnf144a	protein_coding	ring finger protein 144A [Source:MGI Symbol;Acc:MGI:1344401]	8.84662	3.14513	2.49044	3.79982	9.96512e-12	6.68921e-11
ENSMUSG00000067297	112419	Ifit1bl2	protein_coding	interferon induced protein with tetratricopeptide repeats 1B like 2 [Source:MGI Symbol;Acc:MGI:2148249]	4.02197	2.0079	1.5897	2.4261	1.01146e-11	6.76983e-11
ENSMUSG00000047415	238377	Gpr68	protein_coding	G protein-coupled receptor 68 [Source:MGI Symbol;Acc:MGI:2441763]	2.51206	1.32887	1.05205	1.60569	1.01643e-11	6.79984e-11
ENSMUSG00000058317	218793	Ube2e2	protein_coding	ubiquitin-conjugating enzyme E2E 2 [Source:MGI Symbol;Acc:MGI:2384997]	2.44492	1.28979	1.02103	1.55854	1.0237e-11	6.84511e-11
ENSMUSG00000029534	64213	St7	protein_coding	suppression of tumorigenicity 7 [Source:MGI Symbol;Acc:MGI:1927450]	2.72106	1.44417	1.14304	1.7453	1.04278e-11	6.96595e-11
ENSMUSG00000091971	193740	Hspa1a	protein_coding	heat shock protein 1A [Source:MGI Symbol;Acc:MGI:96244]	3.82946	1.93714	1.53294	2.34134	1.06251e-11	7.08753e-11
ENSMUSG00000026893	227960	Gca	protein_coding	grancalcin [Source:MGI Symbol;Acc:MGI:1918521]	2.31792	1.21283	0.958764	1.4669	1.1803e-11	7.80919e-11
ENSMUSG00000035863	18483	Palm	protein_coding	paralemmin [Source:MGI Symbol;Acc:MGI:1261814]	2.40873	1.26827	1.00256	1.53398	1.18328e-11	7.82517e-11
ENSMUSG00000047067	67446	Dusp28	protein_coding	dual specificity phosphatase 28 [Source:MGI Symbol;Acc:MGI:1914696]	2.07879	1.05574	0.834173	1.27732	1.24037e-11	8.18313e-11
ENSMUSG00000041231	79560	Ublcp1	protein_coding	ubiquitin-like domain containing CTD phosphatase 1 [Source:MGI Symbol;Acc:MGI:1933105]	2.22459	1.15354	0.911316	1.39577	1.25799e-11	8.2875e-11
ENSMUSG00000022584	100041546	Ly6c2	protein_coding	lymphocyte antigen 6 complex, locus C2 [Source:MGI Symbol;Acc:MGI:3712069]	94.7149	6.56552	5.18099	7.95005	1.40875e-11	9.24107e-11
ENSMUSG00000029084	12494	Cd38	protein_coding	CD38 antigen [Source:MGI Symbol;Acc:MGI:107474]	219.622	7.77888	6.13832	9.41943	1.41224e-11	9.25956e-11
ENSMUSG00000055809	436022	Dnaaf3	protein_coding	dynein, axonemal assembly factor 3 [Source:MGI Symbol;Acc:MGI:3588207]	2.17121	1.1185	0.8809	1.3561	1.71086e-11	1.10758e-10
ENSMUSG00000090125	18991	Pou3f1	protein_coding	POU domain, class 3, transcription factor 1 [Source:MGI Symbol;Acc:MGI:101896]	2.44777	1.29147	1.01684	1.5661	1.7587e-11	1.13748e-10
ENSMUSG00000034987	15466	Hrh2	protein_coding	histamine receptor H2 [Source:MGI Symbol;Acc:MGI:108482]	20.0086	4.32255	3.40307	5.24203	1.77373e-11	1.14666e-10
ENSMUSG00000074604	211666	Mgst2	protein_coding	microsomal glutathione S-transferase 2 [Source:MGI Symbol;Acc:MGI:2448481]	7.50889	2.9086	2.28671	3.53049	2.03075e-11	1.29885e-10
ENSMUSG00000017002	20568	Slpi	protein_coding	secretory leukocyte peptidase inhibitor [Source:MGI Symbol;Acc:MGI:109297]	877.568	9.77737	7.68242	11.8723	2.14784e-11	1.37184e-10
ENSMUSG00000049848	319930	Ceacam19	protein_coding	carcinoembryonic antigen-related cell adhesion molecule 19 [Source:MGI Symbol;Acc:MGI:2443001]	3.22146	1.68771	1.32553	2.0499	2.23841e-11	1.42705e-10
ENSMUSG00000039701	99526	Usp53	protein_coding	ubiquitin specific peptidase 53 [Source:MGI Symbol;Acc:MGI:2139607]	2.47478	1.3073	1.02567	1.58892	2.47607e-11	1.57349e-10
ENSMUSG00000026826	18227	Nr4a2	protein_coding	nuclear receptor subfamily 4, group A, member 2 [Source:MGI Symbol;Acc:MGI:1352456]	6.48238	2.69652	2.11206	3.28099	2.90743e-11	1.83245e-10
ENSMUSG00000075122	12519	Cd80	protein_coding	CD80 antigen [Source:MGI Symbol;Acc:MGI:101775]	2.43815	1.28579	1.00624	1.56533	3.14907e-11	1.97305e-10
ENSMUSG00000027221	76969	Chst1	protein_coding	carbohydrate sulfotransferase 1 [Source:MGI Symbol;Acc:MGI:1924219]	25.535	4.67441	3.6581	5.69072	3.15253e-11	1.97433e-10
ENSMUSG00000102037	12044	Bcl2a1a	protein_coding	B cell leukemia/lymphoma 2 related protein A1a [Source:MGI Symbol;Acc:MGI:102687]	2.91556	1.54377	1.20748	1.88007	3.31611e-11	2.06741e-10
ENSMUSG00000053398	236539	Phgdh	protein_coding	3-phosphoglycerate dehydrogenase [Source:MGI Symbol;Acc:MGI:1355330]	3.2807	1.714	1.33822	2.08979	3.91959e-11	2.42397e-10
ENSMUSG00000030344	11642	Akap3	protein_coding	A kinase (PRKA) anchor protein 3 [Source:MGI Symbol;Acc:MGI:1341149]	3.01764	1.59342	1.24308	1.94376	4.22038e-11	2.59375e-10
ENSMUSG00000020010	26464	Vnn3	protein_coding	vanin 3 [Source:MGI Symbol;Acc:MGI:1347055]	5.37392	2.42597	1.89094	2.96101	4.57001e-11	2.7962e-10
ENSMUSG00000034416	76645	Pkd1l2	protein_coding	polycystic kidney disease 1 like 2 [Source:MGI Symbol;Acc:MGI:2664668]	2.20532	1.14099	0.889215	1.39276	4.63458e-11	2.83014e-10
ENSMUSG00000020178	11540	Adora2a	protein_coding	adenosine A2a receptor [Source:MGI Symbol;Acc:MGI:99402]	39.6984	5.31101	4.13845	6.48356	4.69765e-11	2.86416e-10
ENSMUSG00000003849	18104	Nqo1	protein_coding	NAD(P)H dehydrogenase, quinone 1 [Source:MGI Symbol;Acc:MGI:103187]	5.66647	2.50245	1.94943	3.05547	4.8171e-11	2.93182e-10
ENSMUSG00000003665	15116	Has1	protein_coding	hyaluronan synthase 1 [Source:MGI Symbol;Acc:MGI:106590]	4.87064	2.28411	1.77933	2.78889	4.81989e-11	2.93223e-10
ENSMUSG00000008318	320100	Relt	protein_coding	RELT tumor necrosis factor receptor [Source:MGI Symbol;Acc:MGI:2443373]	2.56893	1.36117	1.05871	1.66363	5.54806e-11	3.35308e-10
ENSMUSG00000021640	17940	Naip1	protein_coding	NLR family, apoptosis inhibitory protein 1 [Source:MGI Symbol;Acc:MGI:1298223]	6.36867	2.67099	2.07533	3.26666	6.09321e-11	3.66972e-10
ENSMUSG00000031503	12827	Col4a2	protein_coding	collagen, type IV, alpha 2 [Source:MGI Symbol;Acc:MGI:88455]	3.3254	1.73353	1.34521	2.12184	6.82884e-11	4.09671e-10
ENSMUSG00000090881	628693	Gm6904	protein_coding	predicted gene 6904 [Source:MGI Symbol;Acc:MGI:3644962]	2.33088	1.22087	0.946701	1.49505	7.2879e-11	4.36076e-10
ENSMUSG00000058046	214106	4933430I17Rik	protein_coding	RIKEN cDNA 4933430I17 gene [Source:MGI Symbol;Acc:MGI:3045314]	3.87692	1.95491	1.5156	2.39422	7.41366e-11	4.43217e-10
ENSMUSG00000032578	12700	Cish	protein_coding	cytokine inducible SH2-containing protein [Source:MGI Symbol;Acc:MGI:103159]	9.93836	3.31301	2.56734	4.05868	7.71714e-11	4.59968e-10
ENSMUSG00000035852	78906	Misp	protein_coding	mitotic spindle positioning [Source:MGI Symbol;Acc:MGI:1926156]	3.62083	1.85632	1.43842	2.27422	7.76113e-11	4.62391e-10
ENSMUSG00000030214	66857	Plbd1	protein_coding	phospholipase B domain containing 1 [Source:MGI Symbol;Acc:MGI:1914107]	4.48986	2.16667	1.67838	2.65496	7.97592e-11	4.73962e-10
ENSMUSG00000025934	14859	Gsta3	protein_coding	glutathione S-transferase, alpha 3 [Source:MGI Symbol;Acc:MGI:95856]	20.9002	4.38544	3.39547	5.37542	8.32444e-11	4.93401e-10
ENSMUSG00000038963	108115	Slco4a1	protein_coding	solute carrier organic anion transporter family, member 4a1 [Source:MGI Symbol;Acc:MGI:1351866]	2.73422	1.45113	1.12327	1.77898	8.50613e-11	5.03522e-10
ENSMUSG00000079071	381417	Gm14085	protein_coding	predicted gene 14085 [Source:MGI Symbol;Acc:MGI:3702173]	3.64921	1.86758	1.44511	2.29005	8.77977e-11	5.1861e-10
ENSMUSG00000047281	55948	Sfn	protein_coding	stratifin [Source:MGI Symbol;Acc:MGI:1891831]	2.19314	1.133	0.875802	1.39019	9.59837e-11	5.64073e-10
ENSMUSG00000034266	53314	Batf	protein_coding	basic leucine zipper transcription factor, ATF-like [Source:MGI Symbol;Acc:MGI:1859147]	2.5277	1.33782	1.03374	1.6419	9.91697e-11	5.81314e-10
ENSMUSG00000028982	70556	Slc25a33	protein_coding	solute carrier family 25, member 33 [Source:MGI Symbol;Acc:MGI:1917806]	3.27548	1.7117	1.32253	2.10088	9.98846e-11	5.85008e-10
ENSMUSG00000028542	14664	Slc6a9	protein_coding	solute carrier family 6 (neurotransmitter transporter, glycine), member 9 [Source:MGI Symbol;Acc:MGI:95760]	28.5855	4.83721	3.73206	5.94236	1.13037e-10	6.57857e-10
ENSMUSG00000032561	56318	Acpp	protein_coding	acid phosphatase, prostate [Source:MGI Symbol;Acc:MGI:1928480]	11.505	3.52419	2.71694	4.33143	1.20677e-10	7.00556e-10
ENSMUSG00000032487	19225	Ptgs2	protein_coding	prostaglandin-endoperoxide synthase 2 [Source:MGI Symbol;Acc:MGI:97798]	93.6331	6.54895	5.0429	8.055	1.3342e-10	7.6872e-10
ENSMUSG00000031596	11988	Slc7a2	protein_coding	solute carrier family 7 (cationic amino acid transporter, y+ system), member 2 [Source:MGI Symbol;Acc:MGI:99828]	2.02742	1.01965	0.785042	1.25425	1.35122e-10	7.78204e-10
ENSMUSG00000056476	329650	Med12l	protein_coding	mediator complex subunit 12-like [Source:MGI Symbol;Acc:MGI:2139916]	3.2009	1.67848	1.29084	2.06612	1.48546e-10	8.51261e-10
ENSMUSG00000030651	11872	Art2b	protein_coding	ADP-ribosyltransferase 2b [Source:MGI Symbol;Acc:MGI:107545]	11.3309	3.50219	2.69309	4.31128	1.49798e-10	8.58081e-10
ENSMUSG00000028789	242669	Azin2	protein_coding	antizyme inhibitor 2 [Source:MGI Symbol;Acc:MGI:2442093]	2.19733	1.13575	0.873016	1.39849	1.54884e-10	8.85016e-10
ENSMUSG00000026390	17167	Marco	protein_coding	macrophage receptor with collagenous structure [Source:MGI Symbol;Acc:MGI:1309998]	970.137	9.92205	7.62157	12.2225	1.63938e-10	9.33277e-10
ENSMUSG00000024678	66607	Ms4a4d	protein_coding	membrane-spanning 4-domains, subfamily A, member 4D [Source:MGI Symbol;Acc:MGI:1913857]	5.25525	2.39376	1.83617	2.95135	1.84212e-10	1.04184e-09
ENSMUSG00000020826	18126	Nos2	protein_coding	nitric oxide synthase 2, inducible [Source:MGI Symbol;Acc:MGI:97361]	857.841	9.74457	7.47275	12.0164	1.88281e-10	1.06354e-09
ENSMUSG00000059343	353204	Aldoart1	protein_coding	aldolase 1 A, retrogene 1 [Source:MGI Symbol;Acc:MGI:2447811]	2.20279	1.13933	0.87263	1.40603	2.08441e-10	1.16883e-09
ENSMUSG00000020882	12295	Cacnb1	protein_coding	calcium channel, voltage-dependent, beta 1 subunit [Source:MGI Symbol;Acc:MGI:102522]	2.11181	1.07848	0.825775	1.33118	2.1359e-10	1.19576e-09
ENSMUSG00000050957	27356	Insl6	protein_coding	insulin-like 6 [Source:MGI Symbol;Acc:MGI:1351595]	2.17971	1.12414	0.859894	1.38838	2.31299e-10	1.2902e-09
ENSMUSG00000037161	67749	Mgarp	protein_coding	mitochondria localized glutamic acid rich protein [Source:MGI Symbol;Acc:MGI:1914999]	54.2186	5.76072	4.39306	7.12838	2.96109e-10	1.63196e-09
ENSMUSG00000042284	109700	Itga1	protein_coding	integrin alpha 1 [Source:MGI Symbol;Acc:MGI:96599]	19.6983	4.3	3.27873	5.32127	2.98979e-10	1.64713e-09
ENSMUSG00000025321	320910	Itgb8	protein_coding	integrin beta 8 [Source:MGI Symbol;Acc:MGI:1338035]	7.95929	2.99264	2.27991	3.70537	3.20145e-10	1.75187e-09
ENSMUSG00000062939	20849	Stat4	protein_coding	signal transducer and activator of transcription 4 [Source:MGI Symbol;Acc:MGI:103062]	3.22479	1.6892	1.28595	2.09246	3.39367e-10	1.85192e-09
ENSMUSG00000035105	112407	Egln3	protein_coding	egl-9 family hypoxia-inducible factor 3 [Source:MGI Symbol;Acc:MGI:1932288]	8.85939	3.14721	2.39505	3.89937	3.48927e-10	1.90171e-09
ENSMUSG00000027398	16176	Il1b	protein_coding	interleukin 1 beta [Source:MGI Symbol;Acc:MGI:96543]	100.479	6.65075	5.04995	8.25155	4.15491e-10	2.24606e-09
ENSMUSG00000040328	18356	Olfr56	protein_coding	olfactory receptor 56 [Source:MGI Symbol;Acc:MGI:1333785]	4.01021	2.00368	1.52016	2.48719	4.42469e-10	2.38258e-09
ENSMUSG00000036564	234593	Ndrg4	protein_coding	N-myc downstream regulated gene 4 [Source:MGI Symbol;Acc:MGI:2384590]	2.94222	1.5569	1.18071	1.9331	4.56906e-10	2.45459e-09
ENSMUSG00000027399	16175	Il1a	protein_coding	interleukin 1 alpha [Source:MGI Symbol;Acc:MGI:96542]	31.6554	4.98438	3.77805	6.1907	4.75375e-10	2.54786e-09
ENSMUSG00000032418	17436	Me1	protein_coding	malic enzyme 1, NADP(+)-dependent, cytosolic [Source:MGI Symbol;Acc:MGI:97043]	3.11394	1.63874	1.24137	2.03612	4.98309e-10	2.66665e-09
ENSMUSG00000000730	54427	Dnmt3l	protein_coding	DNA (cytosine-5-)-methyltransferase 3-like [Source:MGI Symbol;Acc:MGI:1859287]	26.7667	4.74237	3.58978	5.89495	5.26777e-10	2.81464e-09
ENSMUSG00000062345	18788	Serpinb2	protein_coding	serine (or cysteine) peptidase inhibitor, clade B, member 2 [Source:MGI Symbol;Acc:MGI:97609]	34.9116	5.12564	3.8798	6.37148	5.27844e-10	2.81816e-09
ENSMUSG00000078144	69543	Capns2	protein_coding	calpain, small subunit 2 [Source:MGI Symbol;Acc:MGI:1916793]	4.94063	2.3047	1.74284	2.86655	5.67647e-10	3.01437e-09
ENSMUSG00000092277	NA	Gm19684	protein_coding	predicted gene, 19684 [Source:MGI Symbol;Acc:MGI:5011869]	2.89861	1.53536	1.15965	1.91107	6.21843e-10	3.29332e-09
ENSMUSG00000039304	22035	Tnfsf10	protein_coding	tumor necrosis factor (ligand) superfamily, member 10 [Source:MGI Symbol;Acc:MGI:107414]	2.20131	1.13836	0.859148	1.41757	6.58141e-10	3.47756e-09
ENSMUSG00000067279	53412	Ppp1r3c	protein_coding	protein phosphatase 1, regulatory subunit 3C [Source:MGI Symbol;Acc:MGI:1858229]	10.6746	3.41611	2.57246	4.25975	7.76673e-10	4.07584e-09
ENSMUSG00000021614	13003	Vcan	protein_coding	versican [Source:MGI Symbol;Acc:MGI:102889]	28.0624	4.81057	3.61662	6.00452	8.75641e-10	4.57264e-09
ENSMUSG00000096140	100043332	Ankrd66	protein_coding	ankyrin repeat domain 66 [Source:MGI Symbol;Acc:MGI:1925106]	26.1633	4.70947	3.53524	5.8837	9.77502e-10	5.06821e-09
ENSMUSG00000006179	54373	Prss16	protein_coding	protease, serine 16 (thymus) [Source:MGI Symbol;Acc:MGI:1859181]	2.58438	1.36982	1.02776	1.71188	1.01364e-09	5.24772e-09
ENSMUSG00000079018	17067	Ly6c1	protein_coding	lymphocyte antigen 6 complex, locus C1 [Source:MGI Symbol;Acc:MGI:96882]	13.2118	3.72376	2.79347	4.65404	1.0247e-09	5.30097e-09
ENSMUSG00000089665	NA	Fcor	protein_coding	Foxo1 corepressor [Source:MGI Symbol;Acc:MGI:1915484]	7.94105	2.98933	2.2423	3.73636	1.03217e-09	5.33762e-09
ENSMUSG00000048498	217306	Cd300e	protein_coding	CD300E molecule [Source:MGI Symbol;Acc:MGI:2387602]	4.7676	2.25326	1.68736	2.81916	1.16254e-09	5.96497e-09
ENSMUSG00000032494	21667	Tdgf1	protein_coding	teratocarcinoma-derived growth factor 1 [Source:MGI Symbol;Acc:MGI:98658]	21.1936	4.40555	3.29645	5.51465	1.231e-09	6.29987e-09
ENSMUSG00000055602	21462	Tcp10b	protein_coding	t-complex protein 10b [Source:MGI Symbol;Acc:MGI:98542]	21.1417	4.40202	3.29148	5.51257	1.29428e-09	6.61147e-09
ENSMUSG00000023960	83965	Enpp5	protein_coding	ectonucleotide pyrophosphatase/phosphodiesterase 5 [Source:MGI Symbol;Acc:MGI:1933830]	6.22245	2.63748	1.96629	3.30867	1.59016e-09	8.03974e-09
ENSMUSG00000038065	68235	Mturn	protein_coding	maturin, neural progenitor differentiation regulator homolog (Xenopus) [Source:MGI Symbol;Acc:MGI:1915485]	2.09746	1.06864	0.796641	1.34064	1.59703e-09	8.07154e-09
ENSMUSG00000038037	12703	Socs1	protein_coding	suppressor of cytokine signaling 1 [Source:MGI Symbol;Acc:MGI:1354910]	2.0344	1.0246	0.763565	1.28564	1.63352e-09	8.24995e-09
ENSMUSG00000021493	67399	Pdlim7	protein_coding	PDZ and LIM domain 7 [Source:MGI Symbol;Acc:MGI:1914649]	2.03072	1.02199	0.759833	1.28415	1.91865e-09	9.59184e-09
ENSMUSG00000038412	56295	Higd1a	protein_coding	HIG1 domain family, member 1A [Source:MGI Symbol;Acc:MGI:1930666]	2.14513	1.10106	0.817559	1.38457	2.09531e-09	1.04448e-08
ENSMUSG00000023045	223920	Soat2	protein_coding	sterol O-acyltransferase 2 [Source:MGI Symbol;Acc:MGI:1332226]	5.62304	2.49135	1.84859	3.1341	2.19527e-09	1.09116e-08
ENSMUSG00000018925	629303	Heatr9	protein_coding	HEAT repeat containing 9 [Source:MGI Symbol;Acc:MGI:3650286]	18.8091	4.23336	3.14053	5.32618	2.22575e-09	1.10512e-08
ENSMUSG00000021759	19012	Plpp1	protein_coding	phospholipid phosphatase 1 [Source:MGI Symbol;Acc:MGI:108412]	5.7152	2.5148	1.85894	3.17067	2.82533e-09	1.38738e-08
ENSMUSG00000040329	16196	Il7	protein_coding	interleukin 7 [Source:MGI Symbol;Acc:MGI:96561]	9.72662	3.28194	2.42589	4.13798	2.83398e-09	1.39113e-08
ENSMUSG00000039693	66665	Msantd3	protein_coding	Myb/SANT-like DNA-binding domain containing 3 [Source:MGI Symbol;Acc:MGI:1913915]	5.4079	2.43507	1.79983	3.07031	2.84289e-09	1.39452e-08
ENSMUSG00000026548	98365	Slamf9	protein_coding	SLAM family member 9 [Source:MGI Symbol;Acc:MGI:1923692]	2.19861	1.13659	0.840064	1.43312	2.84804e-09	1.39655e-08
ENSMUSG00000026558	80914	Uck2	protein_coding	uridine-cytidine kinase 2 [Source:MGI Symbol;Acc:MGI:1931744]	3.01189	1.59067	1.17411	2.00723	3.10823e-09	1.51393e-08
ENSMUSG00000021997	70859	Lrrc63	protein_coding	leucine rich repeat containing 63 [Source:MGI Symbol;Acc:MGI:1918109]	6.68876	2.74174	2.02274	3.46073	3.2096e-09	1.56166e-08
ENSMUSG00000093954	100862085	Gm16867	protein_coding	predicted gene, 16867 [Source:MGI Symbol;Acc:MGI:4439791]	2.96477	1.56792	1.1558	1.98004	3.38566e-09	1.64385e-08
ENSMUSG00000039196	18405	Orm1	protein_coding	orosomucoid 1 [Source:MGI Symbol;Acc:MGI:97443]	12.129	3.60039	2.6521	4.54867	3.54901e-09	1.71834e-08
ENSMUSG00000007655	12389	Cav1	protein_coding	caveolin 1, caveolae protein [Source:MGI Symbol;Acc:MGI:102709]	10.9086	3.44739	2.53924	4.35554	3.56354e-09	1.72477e-08
ENSMUSG00000031779	20299	Ccl22	protein_coding	chemokine (C-C motif) ligand 22 [Source:MGI Symbol;Acc:MGI:1306779]	25.4711	4.67079	3.43663	5.90495	3.82078e-09	1.83578e-08
ENSMUSG00000050103	319660	Agmo	protein_coding	alkylglycerol monooxygenase [Source:MGI Symbol;Acc:MGI:2442495]	2.20321	1.13961	0.834518	1.4447	5.15713e-09	2.43554e-08
ENSMUSG00000099974	12047	Bcl2a1d	protein_coding	B cell leukemia/lymphoma 2 related protein A1d [Source:MGI Symbol;Acc:MGI:1278325]	2.38284	1.25268	0.91699	1.58837	5.27396e-09	2.48648e-08
ENSMUSG00000071311	436440	Gpr31b	protein_coding	G protein-coupled receptor 31, D17Leh66b region [Source:MGI Symbol;Acc:MGI:1354372]	5.58527	2.48163	1.81642	3.14684	5.30761e-09	2.50064e-08
ENSMUSG00000024786	622554	Majin	protein_coding	membrane anchored junction protein [Source:MGI Symbol;Acc:MGI:1923913]	5.71329	2.51432	1.83915	3.18949	5.52633e-09	2.59837e-08
ENSMUSG00000043421	69573	Hilpda	protein_coding	hypoxia inducible lipid droplet associated [Source:MGI Symbol;Acc:MGI:1916823]	2.74271	1.4556	1.06449	1.84671	5.60279e-09	2.63022e-08
ENSMUSG00000035235	66597	Trim13	protein_coding	tripartite motif-containing 13 [Source:MGI Symbol;Acc:MGI:1913847]	2.16283	1.11292	0.813499	1.41234	5.77024e-09	2.70386e-08
ENSMUSG00000046618	241327	Olfml2a	protein_coding	olfactomedin-like 2A [Source:MGI Symbol;Acc:MGI:2444741]	17.1471	4.09989	2.99615	5.20363	5.85445e-09	2.73868e-08
ENSMUSG00000001348	11433	Acp5	protein_coding	acid phosphatase 5, tartrate resistant [Source:MGI Symbol;Acc:MGI:87883]	3.27979	1.7136	1.25222	2.17499	5.87323e-09	2.74654e-08
ENSMUSG00000038067	12985	Csf3	protein_coding	colony stimulating factor 3 (granulocyte) [Source:MGI Symbol;Acc:MGI:1339751]	30.1732	4.9152	3.58906	6.24133	6.1526e-09	2.86266e-08
ENSMUSG00000020407	22271	Upp1	protein_coding	uridine phosphorylase 1 [Source:MGI Symbol;Acc:MGI:1097668]	19.4308	4.28027	3.11914	5.44141	6.95805e-09	3.21685e-08
ENSMUSG00000055493	13853	Epm2a	protein_coding	epilepsy, progressive myoclonic epilepsy, type 2 gene alpha [Source:MGI Symbol;Acc:MGI:1341085]	2.43428	1.28349	0.934589	1.6324	7.29099e-09	3.36178e-08
ENSMUSG00000095609	100861753	Gm21188	protein_coding	predicted gene, 21188 [Source:MGI Symbol;Acc:MGI:5434543]	2.14131	1.0985	0.799711	1.39728	7.38575e-09	3.40434e-08
ENSMUSG00000062007	209488	Hsh2d	protein_coding	hematopoietic SH2 domain containing [Source:MGI Symbol;Acc:MGI:2676364]	13.9641	3.80365	2.76742	4.83989	7.65759e-09	3.52142e-08
ENSMUSG00000078349	NA	AW011738	protein_coding	expressed sequence AW011738 [Source:MGI Symbol;Acc:MGI:2140540]	2.0634	1.04503	0.758131	1.33192	9.09686e-09	4.1529e-08
ENSMUSG00000011171	22355	Vipr2	protein_coding	vasoactive intestinal peptide receptor 2 [Source:MGI Symbol;Acc:MGI:107166]	14.3539	3.84337	2.78621	4.90054	9.49541e-09	4.32486e-08
ENSMUSG00000045551	14293	Fpr1	protein_coding	formyl peptide receptor 1 [Source:MGI Symbol;Acc:MGI:107443]	1156	10.1749	7.37534	12.9745	9.56036e-09	4.35157e-08
ENSMUSG00000049532	50524	Sall2	protein_coding	spalt like transcription factor 2 [Source:MGI Symbol;Acc:MGI:1354373]	2.11126	1.07811	0.78105	1.37516	9.86723e-09	4.47945e-08
ENSMUSG00000022864	67102	D16Ertd472e	protein_coding	DNA segment, Chr 16, ERATO Doi 472, expressed [Source:MGI Symbol;Acc:MGI:1196400]	3.67518	1.87782	1.35645	2.39918	1.16881e-08	5.25946e-08
ENSMUSG00000068606	225594	Gm4841	protein_coding	predicted gene 4841 [Source:MGI Symbol;Acc:MGI:3643814]	3.25215	1.70139	1.22749	2.1753	1.2551e-08	5.62396e-08
ENSMUSG00000036256	29817	Igfbp7	protein_coding	insulin-like growth factor binding protein 7 [Source:MGI Symbol;Acc:MGI:1352480]	6.07803	2.6036	1.87399	3.33322	1.43463e-08	6.38086e-08
ENSMUSG00000020785	55984	Camkk1	protein_coding	calcium/calmodulin-dependent protein kinase kinase 1, alpha [Source:MGI Symbol;Acc:MGI:1891766]	22.9578	4.52091	3.25004	5.79178	1.53641e-08	6.81381e-08
ENSMUSG00000091898	21924	Tnnc1	protein_coding	troponin C, cardiac/slow skeletal [Source:MGI Symbol;Acc:MGI:98779]	4.86473	2.28236	1.63969	2.92503	1.59364e-08	7.0563e-08
ENSMUSG00000024011	74116	Pi16	protein_coding	peptidase inhibitor 16 [Source:MGI Symbol;Acc:MGI:1921366]	12.8901	3.68819	2.63532	4.74106	2.14883e-08	9.37056e-08
ENSMUSG00000070691	12399	Runx3	protein_coding	runt related transcription factor 3 [Source:MGI Symbol;Acc:MGI:102672]	3.28674	1.71666	1.22464	2.20867	2.3425e-08	1.01862e-07
ENSMUSG00000006205	56213	Htra1	protein_coding	HtrA serine peptidase 1 [Source:MGI Symbol;Acc:MGI:1929076]	3.41353	1.77126	1.26196	2.28057	2.51089e-08	1.08638e-07
ENSMUSG00000059040	433182	Eno1b	protein_coding	enolase 1B, retrotransposed [Source:MGI Symbol;Acc:MGI:3648653]	2.56085	1.35662	0.965634	1.74761	2.64021e-08	1.13912e-07
ENSMUSG00000051682	224840	Treml4	protein_coding	triggering receptor expressed on myeloid cells-like 4 [Source:MGI Symbol;Acc:MGI:1923239]	19.6711	4.298	3.05539	5.54062	2.82462e-08	1.21414e-07
ENSMUSG00000063522	67038	2010109I03Rik	protein_coding	RIKEN cDNA 2010109I03 gene [Source:MGI Symbol;Acc:MGI:1914288]	14.0808	3.81566	2.70771	4.9236	3.09858e-08	1.32449e-07
ENSMUSG00000052477	620078	C130026I21Rik	protein_coding	RIKEN cDNA C130026I21 gene [Source:MGI Symbol;Acc:MGI:3612702]	3.4871	1.80203	1.27648	2.32758	3.40253e-08	1.44681e-07
ENSMUSG00000003955	70186	Fam162a	protein_coding	family with sequence similarity 162, member A [Source:MGI Symbol;Acc:MGI:1917436]	2.13645	1.09521	0.775106	1.41532	3.56314e-08	1.51e-07
ENSMUSG00000040026	20210	Saa3	protein_coding	serum amyloid A 3 [Source:MGI Symbol;Acc:MGI:98223]	13776.8	13.75	9.72792	17.772	3.62449e-08	1.53505e-07
ENSMUSG00000037411	18787	Serpine1	protein_coding	serine (or cysteine) peptidase inhibitor, clade E, member 1 [Source:MGI Symbol;Acc:MGI:97608]	3.15595	1.65807	1.17276	2.14339	3.67362e-08	1.55491e-07
ENSMUSG00000038235	16456	F11r	protein_coding	F11 receptor [Source:MGI Symbol;Acc:MGI:1321398]	2.04524	1.03227	0.729805	1.33473	3.75703e-08	1.58924e-07
ENSMUSG00000044701	246779	Il27	protein_coding	interleukin 27 [Source:MGI Symbol;Acc:MGI:2384409]	2.41401	1.27143	0.89768	1.64518	4.02446e-08	1.69562e-07
ENSMUSG00000050350	110168	Gpr18	protein_coding	G protein-coupled receptor 18 [Source:MGI Symbol;Acc:MGI:107859]	3.00054	1.58522	1.11786	2.05259	4.28219e-08	1.79818e-07
ENSMUSG00000089844	381287	A530032D15Rik	protein_coding	RIKEN cDNA A530032D15Rik gene [Source:MGI Symbol;Acc:MGI:3037746]	2.16856	1.11674	0.786816	1.44666	4.47204e-08	1.87335e-07
ENSMUSG00000038540	233424	Tmc3	protein_coding	transmembrane channel-like gene family 3 [Source:MGI Symbol;Acc:MGI:2669033]	2.48698	1.3144	0.923567	1.70523	5.12105e-08	2.13231e-07
ENSMUSG00000043939	328830	A530064D06Rik	protein_coding	RIKEN cDNA A530064D06 gene [Source:MGI Symbol;Acc:MGI:2443476]	2.37593	1.24849	0.876815	1.62017	5.25073e-08	2.18433e-07
ENSMUSG00000033287	72844	Kctd17	protein_coding	potassium channel tetramerisation domain containing 17 [Source:MGI Symbol;Acc:MGI:1920094]	2.25522	1.17327	0.818879	1.52765	7.0996e-08	2.90282e-07
ENSMUSG00000030600	80749	Lrfn1	protein_coding	leucine rich repeat and fibronectin type III domain containing 1 [Source:MGI Symbol;Acc:MGI:2136810]	2.00305	1.0022	0.699149	1.30525	7.26277e-08	2.96603e-07
ENSMUSG00000004359	20728	Spic	protein_coding	Spi-C transcription factor (Spi-1/PU.1 related) [Source:MGI Symbol;Acc:MGI:1341168]	2.0371	1.02652	0.710102	1.34293	1.07571e-07	4.29785e-07
ENSMUSG00000016024	16803	Lbp	protein_coding	lipopolysaccharide binding protein [Source:MGI Symbol;Acc:MGI:1098776]	14.4307	3.85107	2.66185	5.04029	1.11618e-07	4.45313e-07
ENSMUSG00000007872	15903	Id3	protein_coding	inhibitor of DNA binding 3 [Source:MGI Symbol;Acc:MGI:96398]	2.00904	1.00651	0.693829	1.31919	1.25985e-07	4.99317e-07
ENSMUSG00000030498	14453	Gas2	protein_coding	growth arrest specific 2 [Source:MGI Symbol;Acc:MGI:95657]	3.69183	1.88434	1.29757	2.4711	1.32121e-07	5.2199e-07
ENSMUSG00000037989	75607	Wnk2	protein_coding	WNK lysine deficient protein kinase 2 [Source:MGI Symbol;Acc:MGI:1922857]	19.1562	4.25974	2.93105	5.58843	1.36683e-07	5.38629e-07
ENSMUSG00000079492	100529082	Gm11127	protein_coding	predicted gene 11127 [Source:MGI Symbol;Acc:MGI:3779381]	3.65202	1.86869	1.28081	2.45658	1.62213e-07	6.33639e-07
ENSMUSG00000054855	223881	Rnd1	protein_coding	Rho family GTPase 1 [Source:MGI Symbol;Acc:MGI:2444878]	3.44	1.78241	1.22119	2.34362	1.64966e-07	6.42938e-07
ENSMUSG00000032204	64008	Aqp9	protein_coding	aquaporin 9 [Source:MGI Symbol;Acc:MGI:1891066]	14.6649	3.87429	2.65266	5.09593	1.69771e-07	6.60365e-07
ENSMUSG00000007783	78070	Cpt1c	protein_coding	carnitine palmitoyltransferase 1c [Source:MGI Symbol;Acc:MGI:2446526]	5.52068	2.46485	1.68736	3.24234	1.70985e-07	6.64898e-07
ENSMUSG00000050953	14609	Gja1	protein_coding	gap junction protein, alpha 1 [Source:MGI Symbol;Acc:MGI:95713]	2.54739	1.34902	0.922675	1.77536	1.77668e-07	6.89431e-07
ENSMUSG00000032091	214523	Tmprss4	protein_coding	transmembrane protease, serine 4 [Source:MGI Symbol;Acc:MGI:2384877]	5.37329	2.42581	1.6555	3.19611	1.95207e-07	7.52948e-07
ENSMUSG00000002797	110175	Ggct	protein_coding	gamma-glutamyl cyclotransferase [Source:MGI Symbol;Acc:MGI:95700]	2.3318	1.22145	0.832948	1.60994	2.01615e-07	7.75716e-07
ENSMUSG00000043079	104027	Synpo	protein_coding	synaptopodin [Source:MGI Symbol;Acc:MGI:1099446]	2.29054	1.19569	0.814985	1.5764	2.0584e-07	7.90214e-07
ENSMUSG00000002980	57278	Bcam	protein_coding	basal cell adhesion molecule [Source:MGI Symbol;Acc:MGI:1929940]	5.11982	2.35609	1.60534	3.10684	2.08963e-07	8.01316e-07
ENSMUSG00000012123	230806	Crybg2	protein_coding	crystallin beta-gamma domain containing 2 [Source:MGI Symbol;Acc:MGI:1334463]	2.55247	1.3519	0.919627	1.78417	2.23747e-07	8.53979e-07
ENSMUSG00000063558	11761	Aox1	protein_coding	aldehyde oxidase 1 [Source:MGI Symbol;Acc:MGI:88035]	5.43579	2.44249	1.66109	3.22389	2.26068e-07	8.62601e-07
ENSMUSG00000041782	16763	Lad1	protein_coding	ladinin [Source:MGI Symbol;Acc:MGI:109343]	6.60037	2.72255	1.85126	3.59383	2.27554e-07	8.68031e-07
ENSMUSG00000087119	NA	Atg4a-ps	protein_coding	autophagy related 4A, pseudogene [Source:MGI Symbol;Acc:MGI:3615624]	3.21146	1.68323	1.14397	2.22248	2.3238e-07	8.8571e-07
ENSMUSG00000031722	15439	Hp	protein_coding	haptoglobin [Source:MGI Symbol;Acc:MGI:96211]	814.975	9.67061	6.516	12.8252	3.3018e-07	1.23498e-06
ENSMUSG00000050914	654824	Ankrd37	protein_coding	ankyrin repeat domain 37 [Source:MGI Symbol;Acc:MGI:3603344]	2.31852	1.2132	0.816967	1.60943	3.38002e-07	1.26083e-06
ENSMUSG00000074227	20733	Spint2	protein_coding	serine protease inhibitor, Kunitz type 2 [Source:MGI Symbol;Acc:MGI:1338031]	10.5617	3.40077	2.28424	4.51731	3.73774e-07	1.38753e-06
ENSMUSG00000006930	15114	Hap1	protein_coding	huntingtin-associated protein 1 [Source:MGI Symbol;Acc:MGI:1261831]	2.47284	1.30617	0.875423	1.73691	4.06926e-07	1.50213e-06
ENSMUSG00000025911	76187	Adhfe1	protein_coding	alcohol dehydrogenase, iron containing, 1 [Source:MGI Symbol;Acc:MGI:1923437]	2.26785	1.18133	0.791545	1.57111	4.11049e-07	1.51613e-06
ENSMUSG00000028602	21941	Tnfrsf8	protein_coding	tumor necrosis factor receptor superfamily, member 8 [Source:MGI Symbol;Acc:MGI:99908]	2.37852	1.25007	0.836952	1.66318	4.23626e-07	1.55961e-06
ENSMUSG00000079694	NA	Gm14862	protein_coding	predicted gene 14862 [Source:MGI Symbol;Acc:MGI:3705234]	3.09074	1.62795	1.08647	2.16943	4.78856e-07	1.74713e-06
ENSMUSG00000031155	18715	Pim2	protein_coding	proviral integration site 2 [Source:MGI Symbol;Acc:MGI:97587]	2.10182	1.07164	0.713405	1.42987	5.26461e-07	1.90823e-06
ENSMUSG00000034394	16878	Lif	protein_coding	leukemia inhibitory factor [Source:MGI Symbol;Acc:MGI:96787]	5.81228	2.53911	1.68949	3.38871	5.36168e-07	1.94087e-06
ENSMUSG00000038550	229599	Ciart	protein_coding	circadian associated repressor of transcription [Source:MGI Symbol;Acc:MGI:2684975]	2.49152	1.31703	0.875604	1.75845	5.53199e-07	1.99604e-06
ENSMUSG00000024548	240427	Setbp1	protein_coding	SET binding protein 1 [Source:MGI Symbol;Acc:MGI:1933199]	20.7042	4.37185	2.89425	5.84945	6.46992e-07	2.30999e-06
ENSMUSG00000031327	12212	Chic1	protein_coding	cysteine-rich hydrophobic domain 1 [Source:MGI Symbol;Acc:MGI:1344694]	3.51951	1.81538	1.20157	2.42918	6.51746e-07	2.32576e-06
ENSMUSG00000054385	26367	Ceacam2	protein_coding	carcinoembryonic antigen-related cell adhesion molecule 2 [Source:MGI Symbol;Acc:MGI:1347246]	2.17502	1.12103	0.740123	1.50193	7.142e-07	2.53946e-06
ENSMUSG00000026235	13838	Epha4	protein_coding	Eph receptor A4 [Source:MGI Symbol;Acc:MGI:98277]	7.34998	2.87774	1.88905	3.86643	8.76126e-07	3.07645e-06
ENSMUSG00000056671	77619	Prelid2	protein_coding	PRELI domain containing 2 [Source:MGI Symbol;Acc:MGI:1924869]	2.23337	1.15922	0.759444	1.559	9.39044e-07	3.28404e-06
ENSMUSG00000022074	21933	Tnfrsf10b	protein_coding	tumor necrosis factor receptor superfamily, member 10b [Source:MGI Symbol;Acc:MGI:1341090]	2.17654	1.12203	0.732833	1.51124	1.04368e-06	3.62341e-06
ENSMUSG00000003352	12297	Cacnb3	protein_coding	calcium channel, voltage-dependent, beta 3 subunit [Source:MGI Symbol;Acc:MGI:103307]	4.04114	2.01476	1.31551	2.71401	1.05424e-06	3.65915e-06
ENSMUSG00000021362	107889	Gcm2	protein_coding	glial cells missing homolog 2 [Source:MGI Symbol;Acc:MGI:1861438]	8.877	3.15007	2.05409	4.24606	1.10264e-06	3.82137e-06
ENSMUSG00000022236	252967	Ropn1l	protein_coding	ropporin 1-like [Source:MGI Symbol;Acc:MGI:2182357]	2.09008	1.06356	0.693128	1.43399	1.12411e-06	3.89392e-06
ENSMUSG00000024186	50782	Rgs11	protein_coding	regulator of G-protein signaling 11 [Source:MGI Symbol;Acc:MGI:1354739]	2.14153	1.09864	0.71541	1.48188	1.15551e-06	3.99861e-06
ENSMUSG00000036661	105841	Dennd3	protein_coding	DENN/MADD domain containing 3 [Source:MGI Symbol;Acc:MGI:2146009]	4.09834	2.03504	1.31926	2.75081	1.34138e-06	4.60263e-06
ENSMUSG00000053395	81905	Cacng8	protein_coding	calcium channel, voltage-dependent, gamma subunit 8 [Source:MGI Symbol;Acc:MGI:1932376]	5.16249	2.36807	1.5298	3.20634	1.50445e-06	5.12026e-06
ENSMUSG00000036537	69942	Rnf113a1	protein_coding	ring finger protein 113A1 [Source:MGI Symbol;Acc:MGI:1917192]	2.63327	1.39685	0.900996	1.89271	1.58126e-06	5.3724e-06
ENSMUSG00000032718	67729	Mansc1	protein_coding	MANSC domain containing 1 [Source:MGI Symbol;Acc:MGI:1914979]	2.08413	1.05945	0.680535	1.43836	1.80542e-06	6.08761e-06
ENSMUSG00000013418	14422	B4galnt2	protein_coding	beta-1,4-N-acetyl-galactosaminyl transferase 2 [Source:MGI Symbol;Acc:MGI:1342058]	2.97343	1.57213	1.00801	2.13625	1.91277e-06	6.4292e-06
ENSMUSG00000047671	242646	Tctex1d4	protein_coding	Tctex1 domain containing 4 [Source:MGI Symbol;Acc:MGI:3045358]	2.49505	1.31907	0.845474	1.79266	1.93255e-06	6.49098e-06
ENSMUSG00000062991	211323	Nrg1	protein_coding	neuregulin 1 [Source:MGI Symbol;Acc:MGI:96083]	18.1652	4.1831	2.66435	5.70186	2.34884e-06	7.79453e-06
ENSMUSG00000047344	236285	Lancl3	protein_coding	LanC lantibiotic synthetase component C-like 3 (bacterial) [Source:MGI Symbol;Acc:MGI:2443335]	3.55149	1.82842	1.16039	2.49645	2.61883e-06	8.64896e-06
ENSMUSG00000027313	69065	Chac1	protein_coding	ChaC, cation transport regulator 1 [Source:MGI Symbol;Acc:MGI:1916315]	10.1566	3.34435	2.12141	4.56728	2.65791e-06	8.76546e-06
ENSMUSG00000026141	12823	Col19a1	protein_coding	collagen, type XIX, alpha 1 [Source:MGI Symbol;Acc:MGI:1095415]	8.45533	3.07986	1.95201	4.20772	2.72516e-06	8.97228e-06
ENSMUSG00000031379	69656	Pir	protein_coding	pirin [Source:MGI Symbol;Acc:MGI:1916906]	2.44673	1.29085	0.816478	1.76523	2.89445e-06	9.48448e-06
ENSMUSG00000073002	53620	Vamp5	protein_coding	vesicle-associated membrane protein 5 [Source:MGI Symbol;Acc:MGI:1858622]	2.02298	1.01648	0.642771	1.3902	2.9165e-06	9.55444e-06
ENSMUSG00000045326	320181	Fndc7	protein_coding	fibronectin type III domain containing 7 [Source:MGI Symbol;Acc:MGI:2443535]	2.92522	1.54855	0.973162	2.12393	3.49305e-06	1.13438e-05
ENSMUSG00000044770	268297	Scml4	protein_coding	Scm polycomb group protein like 4 [Source:MGI Symbol;Acc:MGI:2446140]	5.97971	2.58008	1.61992	3.54023	3.58611e-06	1.16242e-05
ENSMUSG00000010651	235674	Acaa1b	protein_coding	acetyl-Coenzyme A acyltransferase 1B [Source:MGI Symbol;Acc:MGI:3605455]	2.92152	1.54672	0.96775	2.12569	3.95746e-06	1.27621e-05
ENSMUSG00000034997	15558	Htr2a	protein_coding	5-hydroxytryptamine (serotonin) receptor 2A [Source:MGI Symbol;Acc:MGI:109521]	2.57153	1.36263	0.851176	1.87408	4.14279e-06	1.33132e-05
ENSMUSG00000026072	16177	Il1r1	protein_coding	interleukin 1 receptor, type I [Source:MGI Symbol;Acc:MGI:96545]	6.2745	2.6495	1.65099	3.64801	4.4339e-06	1.41762e-05
ENSMUSG00000031955	12927	Bcar1	protein_coding	breast cancer anti-estrogen resistance 1 [Source:MGI Symbol;Acc:MGI:108091]	3.66288	1.87298	1.16009	2.58586	5.22614e-06	1.65636e-05
ENSMUSG00000050075	229323	Gpr171	protein_coding	G protein-coupled receptor 171 [Source:MGI Symbol;Acc:MGI:2442043]	3.36722	1.75156	1.08463	2.41849	5.25939e-06	1.66652e-05
ENSMUSG00000027834	20713	Serpini1	protein_coding	serine (or cysteine) peptidase inhibitor, clade I, member 1 [Source:MGI Symbol;Acc:MGI:1194506]	3.64317	1.86519	1.15124	2.57914	5.73664e-06	1.80739e-05
ENSMUSG00000024334	15001	H2-Oa	protein_coding	histocompatibility 2, O region alpha locus [Source:MGI Symbol;Acc:MGI:95924]	4.86288	2.28181	1.40365	3.15997	6.26839e-06	1.96285e-05
ENSMUSG00000058794	18022	Nfe2	protein_coding	nuclear factor, erythroid derived 2 [Source:MGI Symbol;Acc:MGI:97308]	3.1188	1.64099	1.00621	2.27577	6.81348e-06	2.12344e-05
ENSMUSG00000029314	231510	Gpat3	protein_coding	glycerol-3-phosphate acyltransferase 3 [Source:MGI Symbol;Acc:MGI:3603816]	2.98607	1.57825	0.967568	2.18893	6.84394e-06	2.13197e-05
ENSMUSG00000015314	30925	Slamf6	protein_coding	SLAM family member 6 [Source:MGI Symbol;Acc:MGI:1353620]	4.91772	2.29799	1.40658	3.18939	7.1279e-06	2.21344e-05
ENSMUSG00000037887	18218	Dusp8	protein_coding	dual specificity phosphatase 8 [Source:MGI Symbol;Acc:MGI:106626]	2.06622	1.04699	0.639307	1.45468	7.5808e-06	2.34723e-05
ENSMUSG00000037683	70882	Armc3	protein_coding	armadillo repeat containing 3 [Source:MGI Symbol;Acc:MGI:1918132]	2.27346	1.18489	0.722711	1.64707	7.79406e-06	2.40626e-05
ENSMUSG00000040562	14863	Gstm2	protein_coding	glutathione S-transferase, mu 2 [Source:MGI Symbol;Acc:MGI:95861]	2.94604	1.55878	0.949801	2.16776	7.99441e-06	2.46371e-05
ENSMUSG00000001039	27078	B9d1	protein_coding	B9 protein domain 1 [Source:MGI Symbol;Acc:MGI:1351471]	2.91816	1.54506	0.940779	2.14934	8.13675e-06	2.50479e-05
ENSMUSG00000053110	22601	Yap1	protein_coding	yes-associated protein 1 [Source:MGI Symbol;Acc:MGI:103262]	6.13311	2.61662	1.58996	3.64328	8.56585e-06	2.62752e-05
ENSMUSG00000021403	20706	Serpinb9b	protein_coding	serine (or cysteine) peptidase inhibitor, clade B, member 9b [Source:MGI Symbol;Acc:MGI:894668]	3.38199	1.75787	1.06706	2.44869	8.78508e-06	2.6888e-05
ENSMUSG00000046598	71911	Bdh1	protein_coding	3-hydroxybutyrate dehydrogenase, type 1 [Source:MGI Symbol;Acc:MGI:1919161]	3.17215	1.66546	1.00227	2.32865	1.08268e-05	3.27887e-05
ENSMUSG00000039395	381269	Mreg	protein_coding	melanoregulin [Source:MGI Symbol;Acc:MGI:2151839]	3.68155	1.88031	1.13084	2.62979	1.09952e-05	3.32695e-05
ENSMUSG00000022790	207683	Igsf11	protein_coding	immunoglobulin superfamily, member 11 [Source:MGI Symbol;Acc:MGI:2388477]	2.02407	1.01726	0.608827	1.42569	1.23201e-05	3.70273e-05
ENSMUSG00000045007	103768	Tubg2	protein_coding	tubulin, gamma 2 [Source:MGI Symbol;Acc:MGI:2144208]	2.26522	1.17965	0.70277	1.65653	1.36999e-05	4.08809e-05
ENSMUSG00000028417	21350	Tal2	protein_coding	T cell acute lymphocytic leukemia 2 [Source:MGI Symbol;Acc:MGI:99540]	3.26818	1.70849	0.999296	2.41768	2.05062e-05	5.93841e-05
ENSMUSG00000041538	15002	H2-Ob	protein_coding	histocompatibility 2, O region beta locus [Source:MGI Symbol;Acc:MGI:95925]	2.6675	1.41549	0.825592	2.00538	2.17577e-05	6.27455e-05
ENSMUSG00000022863	12228	Btg3	protein_coding	B cell translocation gene 3 [Source:MGI Symbol;Acc:MGI:109532]	2.40324	1.26498	0.737071	1.79289	2.22157e-05	6.39331e-05
ENSMUSG00000092243	630294	Gm7030	protein_coding	predicted gene 7030 [Source:MGI Symbol;Acc:MGI:3647514]	2.02689	1.01927	0.593236	1.44529	2.27378e-05	6.53406e-05
ENSMUSG00000062783	114564	Csprs	protein_coding	component of Sp100-rs [Source:NCBI gene;Acc:114564]	4.72203	2.23941	1.30012	3.17869	2.39437e-05	6.85919e-05
ENSMUSG00000079808	102638047	AC168977.1	protein_coding	sp110 nuclear body protein-like [Source:NCBI gene;Acc:102638047]	2.15248	1.106	0.637123	1.57487	2.80274e-05	7.95e-05
ENSMUSG00000062310	14659	Glrp1	protein_coding	glutamine repeat protein 1 [Source:MGI Symbol;Acc:MGI:108038]	3.73369	1.9006	1.09423	2.70698	2.83521e-05	8.03223e-05
ENSMUSG00000064179	21955	Tnnt1	protein_coding	troponin T1, skeletal, slow [Source:MGI Symbol;Acc:MGI:1333868]	2.97954	1.57509	0.906417	2.24376	2.86045e-05	8.09709e-05
ENSMUSG00000027360	15186	Hdc	protein_coding	histidine decarboxylase [Source:MGI Symbol;Acc:MGI:96062]	2.95523	1.56327	0.893176	2.23337	3.29182e-05	9.23686e-05
ENSMUSG00000020717	18613	Pecam1	protein_coding	platelet/endothelial cell adhesion molecule 1 [Source:MGI Symbol;Acc:MGI:97537]	2.69063	1.42794	0.815754	2.04013	3.29979e-05	9.25547e-05
ENSMUSG00000037188	230824	Grhl3	protein_coding	grainyhead like transcription factor 3 [Source:MGI Symbol;Acc:MGI:2655333]	3.24641	1.69885	0.967081	2.43061	3.53131e-05	9.86085e-05
ENSMUSG00000029581	14086	Fscn1	protein_coding	fascin actin-bundling protein 1 [Source:MGI Symbol;Acc:MGI:1352745]	3.89176	1.96042	1.11342	2.80743	3.68854e-05	0.000102833
ENSMUSG00000048905	207819	4930539E08Rik	protein_coding	RIKEN cDNA 4930539E08 gene [Source:MGI Symbol;Acc:MGI:1925441]	3.78829	1.92155	1.08627	2.75683	4.0235e-05	0.000111631
ENSMUSG00000013076	75723	Amotl1	protein_coding	angiomotin-like 1 [Source:MGI Symbol;Acc:MGI:1922973]	2.94578	1.55865	0.87893	2.23837	4.2121e-05	0.000116606
ENSMUSG00000001168	246729	Oas1h	protein_coding	2'-5' oligoadenylate synthetase 1H [Source:MGI Symbol;Acc:MGI:2180853]	2.13589	1.09484	0.614419	1.57526	4.59671e-05	0.000126469
ENSMUSG00000027315	20732	Spint1	protein_coding	serine protease inhibitor, Kunitz type 1 [Source:MGI Symbol;Acc:MGI:1338033]	5.27357	2.39878	1.34466	3.4529	4.69127e-05	0.000128891
ENSMUSG00000054932	11576	Afp	protein_coding	alpha fetoprotein [Source:MGI Symbol;Acc:MGI:87951]	2.58743	1.37152	0.767712	1.97532	4.81353e-05	0.000132014
ENSMUSG00000016255	545486	Tubb1	protein_coding	tubulin, beta 1 class VI [Source:MGI Symbol;Acc:MGI:107814]	2.37743	1.2494	0.696311	1.8025	5.19959e-05	0.000141842
ENSMUSG00000064147	442827	Rab44	protein_coding	RAB44, member RAS oncogene family [Source:MGI Symbol;Acc:MGI:3045302]	3.28265	1.71486	0.952601	2.47712	5.50391e-05	0.000149584
ENSMUSG00000096850	NA	Gm21748	protein_coding	predicted gene, 21748 [Source:MGI Symbol;Acc:MGI:5433912]	2.72761	1.44764	0.801855	2.09342	5.78259e-05	0.000156511
ENSMUSG00000057135	327957	Scimp	protein_coding	SLP adaptor and CSK interacting membrane protein [Source:MGI Symbol;Acc:MGI:3610314]	2.03359	1.02403	0.564734	1.48333	6.22972e-05	0.00016771
ENSMUSG00000020183	70574	Cpm	protein_coding	carboxypeptidase M [Source:MGI Symbol;Acc:MGI:1917824]	2.26929	1.18224	0.651162	1.71332	6.36333e-05	0.000171158
ENSMUSG00000025489	73835	Ifitm5	protein_coding	interferon induced transmembrane protein 5 [Source:MGI Symbol;Acc:MGI:1934923]	2.19575	1.13471	0.624152	1.64527	6.50647e-05	0.000174872
ENSMUSG00000020142	55963	Slc1a4	protein_coding	solute carrier family 1 (glutamate/neutral amino acid transporter), member 4 [Source:MGI Symbol;Acc:MGI:2135601]	2.50425	1.32438	0.728424	1.92033	6.51455e-05	0.000175055
ENSMUSG00000064280	75172	Ccdc146	protein_coding	coiled-coil domain containing 146 [Source:MGI Symbol;Acc:MGI:1922422]	3.02942	1.59904	0.878303	2.31978	6.66297e-05	0.0001788
ENSMUSG00000079484	227696	Phyhd1	protein_coding	phytanoyl-CoA dioxygenase domain containing 1 [Source:MGI Symbol;Acc:MGI:3612860]	2.22137	1.15145	0.629085	1.67382	7.27465e-05	0.000193897
ENSMUSG00000095366	NA	Gm21860	protein_coding	predicted gene, 21860 [Source:MGI Symbol;Acc:MGI:5434024]	2.67844	1.42139	0.776127	2.06666	7.34187e-05	0.000195576
ENSMUSG00000056832	264134	Ttc26	protein_coding	tetratricopeptide repeat domain 26 [Source:MGI Symbol;Acc:MGI:2444853]	2.06825	1.04841	0.567486	1.52933	8.4415e-05	0.000222765
ENSMUSG00000030825	66065	Hsd17b14	protein_coding	hydroxysteroid (17-beta) dehydrogenase 14 [Source:MGI Symbol;Acc:MGI:1913315]	3.07396	1.6201	0.872624	2.36758	9.11558e-05	0.000239412
ENSMUSG00000024620	18596	Pdgfrb	protein_coding	platelet derived growth factor receptor, beta polypeptide [Source:MGI Symbol;Acc:MGI:97531]	2.85476	1.51337	0.814483	2.21225	9.22893e-05	0.000242251
ENSMUSG00000022686	108105	B3gnt5	protein_coding	UDP-GlcNAc:betaGal beta-1,3-N-acetylglucosaminyltransferase 5 [Source:MGI Symbol;Acc:MGI:2137302]	3.60075	1.8483	0.994046	2.70255	9.32827e-05	0.000244533
ENSMUSG00000031520	22341	Vegfc	protein_coding	vascular endothelial growth factor C [Source:MGI Symbol;Acc:MGI:109124]	2.19253	1.1326	0.607338	1.65785	9.75795e-05	0.000254639
ENSMUSG00000060429	20649	Sntb1	protein_coding	syntrophin, basic 1 [Source:MGI Symbol;Acc:MGI:101781]	3.19071	1.67388	0.894815	2.45294	0.000102261	0.000265802
ENSMUSG00000042010	100705	Acacb	protein_coding	acetyl-Coenzyme A carboxylase beta [Source:MGI Symbol;Acc:MGI:2140940]	2.21953	1.15026	0.614273	1.68624	0.000103838	0.000269546
ENSMUSG00000063296	320709	Tmem117	protein_coding	transmembrane protein 117 [Source:MGI Symbol;Acc:MGI:2444580]	5.90977	2.5631	1.36575	3.76045	0.000107327	0.00027782
ENSMUSG00000060509	23832	Xcr1	protein_coding	chemokine (C motif) receptor 1 [Source:MGI Symbol;Acc:MGI:1346338]	2.64818	1.405	0.741318	2.06868	0.000123938	0.000317727
ENSMUSG00000003273	12348	Car11	protein_coding	carbonic anhydrase 11 [Source:MGI Symbol;Acc:MGI:1336193]	2.01757	1.01262	0.533203	1.49204	0.000127597	0.000326474
ENSMUSG00000032514	74052	Ttc21a	protein_coding	tetratricopeptide repeat domain 21A [Source:MGI Symbol;Acc:MGI:1921302]	2.97809	1.57439	0.82811	2.32067	0.000129571	0.000331
ENSMUSG00000026950	17996	Neb	protein_coding	nebulin [Source:MGI Symbol;Acc:MGI:97292]	2.38648	1.25488	0.655818	1.85395	0.000141832	0.000360723
ENSMUSG00000002475	106861	Abhd3	protein_coding	abhydrolase domain containing 3 [Source:MGI Symbol;Acc:MGI:2147183]	2.30137	1.20249	0.617927	1.78705	0.00017807	0.000447619
ENSMUSG00000023911	76917	Flywch2	protein_coding	FLYWCH family member 2 [Source:MGI Symbol;Acc:MGI:1924167]	2.45215	1.29405	0.659491	1.92861	0.000198192	0.000495498
ENSMUSG00000028347	230157	Tmeff1	protein_coding	transmembrane protein with EGF-like and two follistatin-like domains 1 [Source:MGI Symbol;Acc:MGI:1926810]	2.92477	1.54832	0.785544	2.3111	0.000209767	0.00052283
ENSMUSG00000032356	19417	Rasgrf1	protein_coding	RAS protein-specific guanine nucleotide-releasing factor 1 [Source:MGI Symbol;Acc:MGI:99694]	3.61827	1.8553	0.935729	2.77487	0.000225794	0.00055995
ENSMUSG00000036766	227325	Dner	protein_coding	delta/notch-like EGF repeat containing [Source:MGI Symbol;Acc:MGI:2152889]	2.24318	1.16555	0.586739	1.74435	0.00023109	0.000572056
ENSMUSG00000019992	71804	Mtfr2	protein_coding	mitochondrial fission regulator 2 [Source:MGI Symbol;Acc:MGI:1919054]	2.31039	1.20814	0.60791	1.80837	0.000232346	0.000574754
ENSMUSG00000003863	76787	Ppfia3	protein_coding	protein tyrosine phosphatase, receptor type, f polypeptide (PTPRF), interacting protein (liprin), alpha 3 [Source:MGI Symbol;Acc:MGI:1924037]	2.24316	1.16553	0.586021	1.74505	0.000234542	0.000579668
ENSMUSG00000053846	16891	Lipg	protein_coding	lipase, endothelial [Source:MGI Symbol;Acc:MGI:1341803]	2.24559	1.1671	0.579254	1.75494	0.000273719	0.000668606
ENSMUSG00000024968	104383	Rcor2	protein_coding	REST corepressor 2 [Source:MGI Symbol;Acc:MGI:1859854]	2.1388	1.0968	0.543892	1.64971	0.000276509	0.000675065
ENSMUSG00000035355	380728	Kcnh4	protein_coding	potassium voltage-gated channel, subfamily H (eag-related), member 4 [Source:MGI Symbol;Acc:MGI:2156184]	2.08837	1.06238	0.51829	1.60646	0.000332724	0.000802951
ENSMUSG00000039835	215819	Nhsl1	protein_coding	NHS-like 1 [Source:MGI Symbol;Acc:MGI:106390]	2.15648	1.10868	0.539741	1.67761	0.000340524	0.000819914
ENSMUSG00000054065	56460	Pkp3	protein_coding	plakophilin 3 [Source:MGI Symbol;Acc:MGI:1891830]	2.19919	1.13697	0.549003	1.72494	0.000372096	0.000890198
ENSMUSG00000019929	13179	Dcn	protein_coding	decorin [Source:MGI Symbol;Acc:MGI:94872]	3.28569	1.7162	0.825797	2.6066	0.000386177	0.000921334
ENSMUSG00000020357	14257	Flt4	protein_coding	FMS-like tyrosine kinase 4 [Source:MGI Symbol;Acc:MGI:95561]	2.38529	1.25416	0.59623	1.9121	0.000437724	0.00103503
ENSMUSG00000038583	18821	Pln	protein_coding	phospholamban [Source:MGI Symbol;Acc:MGI:97622]	2.14975	1.10417	0.514775	1.69356	0.000530823	0.00124053
ENSMUSG00000036091	109685	Hyal3	protein_coding	hyaluronoglucosaminidase 3 [Source:MGI Symbol;Acc:MGI:1330288]	2.24351	1.16576	0.526493	1.80502	0.000709711	0.00162213
ENSMUSG00000018919	75604	Tm4sf5	protein_coding	transmembrane 4 superfamily member 5 [Source:MGI Symbol;Acc:MGI:1922854]	2.18391	1.12692	0.501485	1.75235	0.00080509	0.00182206
ENSMUSG00000014846	67971	Tppp3	protein_coding	tubulin polymerization-promoting protein family member 3 [Source:MGI Symbol;Acc:MGI:1915221]	2.55486	1.35324	0.583879	2.12261	0.00103058	0.00229113
ENSMUSG00000033278	19274	Ptprm	protein_coding	protein tyrosine phosphatase, receptor type, M [Source:MGI Symbol;Acc:MGI:102694]	2.28407	1.19161	0.51356	1.86965	0.00103948	0.00230832
ENSMUSG00000031257	237038	Nox1	protein_coding	NADPH oxidase 1 [Source:MGI Symbol;Acc:MGI:2450016]	3.51475	1.81342	0.778565	2.84828	0.0010701	0.00236984
ENSMUSG00000020205	21664	Phlda1	protein_coding	pleckstrin homology like domain, family A, member 1 [Source:MGI Symbol;Acc:MGI:1096880]	2.00827	1.00595	0.423295	1.5886	0.0012401	0.0027133
ENSMUSG00000050860	237928	Phospho1	protein_coding	phosphatase, orphan 1 [Source:MGI Symbol;Acc:MGI:2447348]	2.35584	1.23624	0.512593	1.95989	0.00137467	0.00298553
ENSMUSG00000021643	20365	Serf1	protein_coding	small EDRK-rich factor 1 [Source:MGI Symbol;Acc:MGI:1337114]	2.11551	1.08101	0.44318	1.71884	0.00148393	0.00320471
ENSMUSG00000092349	NA	Platr17	protein_coding	pluripotency associated transcript 17 [Source:MGI Symbol;Acc:MGI:3054967]	2.56364	1.3582	0.542018	2.17437	0.00176409	0.00376043
ENSMUSG00000028158	17777	Mttp	protein_coding	microsomal triglyceride transfer protein [Source:MGI Symbol;Acc:MGI:106926]	2.19225	1.13241	0.449374	1.81545	0.00182633	0.00387815
ENSMUSG00000034842	109979	Art3	protein_coding	ADP-ribosyltransferase 3 [Source:MGI Symbol;Acc:MGI:1202729]	2.93063	1.55121	0.607971	2.49445	0.00196778	0.00415934
ENSMUSG00000038807	380711	Rap1gap2	protein_coding	RAP1 GTPase activating protein 2 [Source:MGI Symbol;Acc:MGI:3028623]	2.04251	1.03034	0.402948	1.65773	0.00199316	0.00420786
ENSMUSG00000025887	12364	Casp12	protein_coding	caspase 12 [Source:MGI Symbol;Acc:MGI:1312922]	2.43086	1.28146	0.499148	2.06378	0.0020406	0.00430012
ENSMUSG00000050370	12642	Ch25h	protein_coding	cholesterol 25-hydroxylase [Source:MGI Symbol;Acc:MGI:1333869]	2.16004	1.11105	0.404982	1.81713	0.00291355	0.00596868
ENSMUSG00000026043	12825	Col3a1	protein_coding	collagen, type III, alpha 1 [Source:MGI Symbol;Acc:MGI:88453]	3.743	1.90419	0.685779	3.12261	0.00308952	0.00630396
ENSMUSG00000033644	57746	Piwil2	protein_coding	piwi-like RNA-mediated gene silencing 2 [Source:MGI Symbol;Acc:MGI:1930036]	2.04937	1.03518	0.372354	1.69801	0.0031078	0.00633658
ENSMUSG00000021758	13206	Ddx4	protein_coding	DEAD (Asp-Glu-Ala-Asp) box polypeptide 4 [Source:MGI Symbol;Acc:MGI:102670]	2.1182	1.08284	0.377093	1.78859	0.00360803	0.00726228
ENSMUSG00000073010	331493	Gm5127	protein_coding	predicted gene 5127 [Source:MGI Symbol;Acc:MGI:3648285]	2.64227	1.40178	0.47354	2.33002	0.00411075	0.00818481
ENSMUSG00000031434	75746	Morc4	protein_coding	microrchidia 4 [Source:MGI Symbol;Acc:MGI:1922996]	-2.75069	-1.45979	-2.3725	-0.547091	0.00252771	0.00523251
ENSMUSG00000040621	237221	Gemin8	protein_coding	gem nuclear organelle associated protein 8 [Source:MGI Symbol;Acc:MGI:2384300]	-2.02686	-1.01925	-1.63353	-0.404965	0.00181264	0.00385382
ENSMUSG00000074476	67629	Spc24	protein_coding	SPC24, NDC80 kinetochore complex component, homolog (S. cerevisiae) [Source:MGI Symbol;Acc:MGI:1914879]	-2.13651	-1.09526	-1.75248	-0.438034	0.00174054	0.00371364
ENSMUSG00000024530	225655	Prelid3a	protein_coding	PRELI domain containing 3A [Source:MGI Symbol;Acc:MGI:2442865]	-2.03002	-1.02149	-1.62395	-0.419032	0.00147799	0.00319238
ENSMUSG00000025407	14632	Gli1	protein_coding	GLI-Kruppel family member GLI1 [Source:MGI Symbol;Acc:MGI:95727]	-2.38555	-1.25432	-1.98997	-0.518679	0.00140044	0.00303627
ENSMUSG00000001763	232670	Tspan33	protein_coding	tetraspanin 33 [Source:MGI Symbol;Acc:MGI:1919012]	-3.65343	-1.86925	-2.93952	-0.798979	0.0011063	0.00244219
ENSMUSG00000093668	75507	Pou5f2	protein_coding	POU domain class 5, transcription factor 2 [Source:MGI Symbol;Acc:MGI:1922757]	-2.12512	-1.08755	-1.70116	-0.473936	0.00095399	0.00213114
ENSMUSG00000020834	70451	Dhrs13	protein_coding	dehydrogenase/reductase (SDR family) member 13 [Source:MGI Symbol;Acc:MGI:1917701]	-2.00903	-1.0065	-1.56828	-0.444718	0.000853917	0.00192249
ENSMUSG00000041064	208084	Pif1	protein_coding	PIF1 5'-to-3' DNA helicase [Source:MGI Symbol;Acc:MGI:2143057]	-2.77055	-1.47017	-2.28843	-0.651915	0.000829207	0.00187266
ENSMUSG00000024910	13041	Ctsw	protein_coding	cathepsin W [Source:MGI Symbol;Acc:MGI:1338045]	-2.12999	-1.09085	-1.69729	-0.484399	0.000819504	0.00185225
ENSMUSG00000034773	217216	BC030867	protein_coding	cDNA sequence BC030867 [Source:MGI Symbol;Acc:MGI:2387601]	-2.0257	-1.01842	-1.57911	-0.457729	0.000740073	0.00168512
ENSMUSG00000061723	21957	Tnnt3	protein_coding	troponin T3, skeletal, fast [Source:MGI Symbol;Acc:MGI:109550]	-2.6261	-1.39292	-2.15802	-0.62782	0.000722262	0.00164836
ENSMUSG00000048794	243538	Cfap100	protein_coding	cilia and flagella associated protein 100 [Source:MGI Symbol;Acc:MGI:2141635]	-2.3274	-1.21872	-1.88618	-0.551262	0.000700207	0.00160173
ENSMUSG00000028687	70603	Mutyh	protein_coding	mutY DNA glycosylase [Source:MGI Symbol;Acc:MGI:1917853]	-2.53685	-1.34304	-2.07512	-0.610961	0.000665907	0.00153163
ENSMUSG00000000317	12029	Bcl6b	protein_coding	B cell CLL/lymphoma 6, member B [Source:MGI Symbol;Acc:MGI:1278332]	-2.28473	-1.19203	-1.83705	-0.547004	0.00061562	0.00142426
ENSMUSG00000035878	235386	Hykk	protein_coding	hydroxylysine kinase 1 [Source:MGI Symbol;Acc:MGI:2443139]	-2.40105	-1.26367	-1.94421	-0.583126	0.000584749	0.00135806
ENSMUSG00000040963	11890	Asgr2	protein_coding	asialoglycoprotein receptor 2 [Source:MGI Symbol;Acc:MGI:88082]	-2.58612	-1.37079	-2.10849	-0.633094	0.000580159	0.00134899
ENSMUSG00000046378	233879	Asphd1	protein_coding	aspartate beta-hydroxylase domain containing 1 [Source:MGI Symbol;Acc:MGI:2685014]	-2.55587	-1.35382	-2.07984	-0.627794	0.000558532	0.00130221
ENSMUSG00000031502	12826	Col4a1	protein_coding	collagen, type IV, alpha 1 [Source:MGI Symbol;Acc:MGI:88454]	-2.60301	-1.38018	-2.11163	-0.648733	0.000490355	0.00115238
ENSMUSG00000028549	67733	Itgb3bp	protein_coding	integrin beta 3 binding protein (beta3-endonexin) [Source:MGI Symbol;Acc:MGI:1914983]	-2.09085	-1.06409	-1.6251	-0.503078	0.00046286	0.0010911
ENSMUSG00000012777	100503991	Acp4	protein_coding	acid phosphatase 4 [Source:MGI Symbol;Acc:MGI:3644563]	-2.48068	-1.31073	-1.99414	-0.627326	0.000408487	0.000969877
ENSMUSG00000074194	244556	Zfp791	protein_coding	zinc finger protein 791 [Source:MGI Symbol;Acc:MGI:3648473]	-2.26379	-1.17874	-1.79226	-0.565221	0.000400519	0.00095243
ENSMUSG00000030683	233878	Sez6l2	protein_coding	seizure related 6 homolog like 2 [Source:MGI Symbol;Acc:MGI:2385295]	-2.06698	-1.04753	-1.5887	-0.506352	0.000367865	0.000881754
ENSMUSG00000037962	73121	Rflna	protein_coding	refilin A [Source:MGI Symbol;Acc:MGI:1920371]	-2.19866	-1.13662	-1.72256	-0.550684	0.000358875	0.0008611
ENSMUSG00000079001	NA	4930404H24Rik	protein_coding	RIKEN cDNA 4930404H24 gene [Source:MGI Symbol;Acc:MGI:1925401]	-2.9017	-1.5369	-2.32893	-0.744867	0.00035756	0.000858242
ENSMUSG00000029591	22256	Ung	protein_coding	uracil DNA glycosylase [Source:MGI Symbol;Acc:MGI:109352]	-2.01375	-1.00989	-1.52692	-0.492854	0.000331454	0.000800304
ENSMUSG00000090958	434215	Lrrc32	protein_coding	leucine rich repeat containing 32 [Source:MGI Symbol;Acc:MGI:93882]	-2.52767	-1.33781	-2.0112	-0.664418	0.000271627	0.00066385
ENSMUSG00000069302	319168	Hist1h2ah	protein_coding	histone cluster 1, H2ah [Source:MGI Symbol;Acc:MGI:2448295]	-2.56751	-1.36037	-2.03807	-0.682678	0.000240045	0.000592527
ENSMUSG00000028051	15168	Hcn3	protein_coding	hyperpolarization-activated, cyclic nucleotide-gated K+ 3 [Source:MGI Symbol;Acc:MGI:1298211]	-3.37222	-1.7537	-2.6222	-0.885195	0.000223577	0.000554651
ENSMUSG00000042351	17444	Grap2	protein_coding	GRB2-related adaptor protein 2 [Source:MGI Symbol;Acc:MGI:1333842]	-3.12571	-1.64418	-2.4557	-0.832669	0.000214579	0.00053386
ENSMUSG00000051065	239796	Mb21d2	protein_coding	Mab-21 domain containing 2 [Source:MGI Symbol;Acc:MGI:1917028]	-2.14576	-1.10149	-1.64171	-0.561274	0.000198563	0.000496156
ENSMUSG00000009092	70377	Derl3	protein_coding	Der1-like domain family, member 3 [Source:MGI Symbol;Acc:MGI:1917627]	-2.3689	-1.24422	-1.8497	-0.63873	0.000180412	0.000453177
ENSMUSG00000044206	278180	Vsig4	protein_coding	V-set and immunoglobulin domain containing 4 [Source:MGI Symbol;Acc:MGI:2679720]	-3.09229	-1.62867	-2.41349	-0.843855	0.000159602	0.000403838
ENSMUSG00000021697	218581	Depdc1b	protein_coding	DEP domain containing 1B [Source:MGI Symbol;Acc:MGI:2145425]	-4.04763	-2.01708	-2.98686	-1.04729	0.000155133	0.000393179
ENSMUSG00000023927	20230	Satb1	protein_coding	special AT-rich sequence binding protein 1 [Source:MGI Symbol;Acc:MGI:105084]	-2.13512	-1.09431	-1.61799	-0.570637	0.000146249	0.000371412
ENSMUSG00000049097	545554	Ankrd34a	protein_coding	ankyrin repeat domain 34A [Source:MGI Symbol;Acc:MGI:3617846]	-2.73247	-1.45021	-2.13761	-0.762801	0.000129549	0.000331
ENSMUSG00000037196	69310	Pacrg	protein_coding	PARK2 co-regulated [Source:MGI Symbol;Acc:MGI:1916560]	-2.29104	-1.196	-1.75188	-0.640119	0.000100435	0.00026135
ENSMUSG00000030865	70261	Chp2	protein_coding	calcineurin-like EF hand protein 2 [Source:MGI Symbol;Acc:MGI:1917511]	-3.16295	-1.66127	-2.43297	-0.889562	9.97131e-05	0.000259716
ENSMUSG00000078773	623474	Rad54b	protein_coding	RAD54 homolog B (S. cerevisiae) [Source:MGI Symbol;Acc:MGI:3605986]	-3.32762	-1.73449	-2.53628	-0.932704	9.3493e-05	0.000245038
ENSMUSG00000005045	269610	Chd5	protein_coding	chromodomain helicase DNA binding protein 5 [Source:MGI Symbol;Acc:MGI:3036258]	-2.03297	-1.02359	-1.491	-0.55617	7.94619e-05	0.000210579
ENSMUSG00000055675	74901	Kbtbd11	protein_coding	kelch repeat and BTB (POZ) domain containing 11 [Source:MGI Symbol;Acc:MGI:1922151]	-3.56919	-1.8356	-2.6642	-1.00699	6.80049e-05	0.000182243
ENSMUSG00000045802	245525	Hsf3	protein_coding	heat shock transcription factor 3 [Source:MGI Symbol;Acc:MGI:3045337]	-2.47805	-1.3092	-1.89503	-0.723378	6.03238e-05	0.000162794
ENSMUSG00000039063	67856	Echdc3	protein_coding	enoyl Coenzyme A hydratase domain containing 3 [Source:MGI Symbol;Acc:MGI:1915106]	-3.46715	-1.79375	-2.59469	-0.992817	5.85797e-05	0.000158428
ENSMUSG00000045318	11553	Adra2c	protein_coding	adrenergic receptor, alpha 2c [Source:MGI Symbol;Acc:MGI:87936]	-3.88309	-1.95721	-2.82986	-1.08455	5.7422e-05	0.00015554
ENSMUSG00000069309	319170	Hist1h2an	protein_coding	histone cluster 1, H2an [Source:MGI Symbol;Acc:MGI:2448300]	-2.32052	-1.21445	-1.75243	-0.67647	5.2482e-05	0.000143028
ENSMUSG00000004558	29811	Ndrg2	protein_coding	N-myc downstream regulated gene 2 [Source:MGI Symbol;Acc:MGI:1352498]	-2.06061	-1.04307	-1.50487	-0.581281	5.20577e-05	0.000141983
ENSMUSG00000050272	13508	Dscam	protein_coding	DS cell adhesion molecule [Source:MGI Symbol;Acc:MGI:1196281]	-3.14514	-1.65312	-2.38107	-0.925182	4.82834e-05	0.000132368
ENSMUSG00000060512	76261	0610040J01Rik	protein_coding	RIKEN cDNA 0610040J01 gene [Source:MGI Symbol;Acc:MGI:1923511]	-3.38145	-1.75764	-2.52715	-0.988132	4.452e-05	0.000122781
ENSMUSG00000017767	75642	Spata25	protein_coding	spermatogenesis associated 25 [Source:MGI Symbol;Acc:MGI:1922892]	-2.35193	-1.23385	-1.77296	-0.694725	4.32937e-05	0.000119566
ENSMUSG00000034303	245902	Ccdc15	protein_coding	coiled-coil domain containing 15 [Source:MGI Symbol;Acc:MGI:2444488]	-2.15412	-1.1071	-1.58989	-0.624306	4.21093e-05	0.000116606
ENSMUSG00000059336	108052	Slc14a1	protein_coding	solute carrier family 14 (urea transporter), member 1 [Source:MGI Symbol;Acc:MGI:1351654]	-3.49095	-1.80362	-2.58323	-1.02401	3.71228e-05	0.000103453
ENSMUSG00000050132	237868	Sarm1	protein_coding	sterile alpha and HEAT/Armadillo motif containing 1 [Source:MGI Symbol;Acc:MGI:2136419]	-2.74168	-1.45506	-2.0815	-0.828627	3.50531e-05	9.79616e-05
ENSMUSG00000041444	330914	Arhgap32	protein_coding	Rho GTPase activating protein 32 [Source:MGI Symbol;Acc:MGI:2450166]	-5.9786	-2.57981	-3.67024	-1.48937	2.68332e-05	7.62847e-05
ENSMUSG00000037455	76306	Slc18b1	protein_coding	solute carrier family 18, subfamily B, member 1 [Source:MGI Symbol;Acc:MGI:1923556]	-2.31515	-1.2111	-1.72065	-0.701554	2.50649e-05	7.15963e-05
ENSMUSG00000020808	109212	Pimreg	protein_coding	PICALM interacting mitotic regulator [Source:MGI Symbol;Acc:MGI:1924434]	-2.0348	-1.02489	-1.45212	-0.59765	2.18492e-05	6.297e-05
ENSMUSG00000057132	77945	Rpgrip1	protein_coding	retinitis pigmentosa GTPase regulator interacting protein 1 [Source:MGI Symbol;Acc:MGI:1932134]	-2.42472	-1.27782	-1.80933	-0.746301	2.11508e-05	6.11229e-05
ENSMUSG00000022421	73340	Nptxr	protein_coding	neuronal pentraxin receptor [Source:MGI Symbol;Acc:MGI:1920590]	-2.30648	-1.20569	-1.70647	-0.70491	2.06919e-05	5.98843e-05
ENSMUSG00000071064	622675	Zfp827	protein_coding	zinc finger protein 827 [Source:MGI Symbol;Acc:MGI:2444807]	-2.26602	-1.18016	-1.66746	-0.692861	1.89368e-05	5.50467e-05
ENSMUSG00000047787	396184	Flrt1	protein_coding	fibronectin leucine rich transmembrane protein 1 [Source:MGI Symbol;Acc:MGI:3026647]	-2.83888	-1.50532	-2.12607	-0.884574	1.85658e-05	5.40436e-05
ENSMUSG00000023912	74011	Slc25a27	protein_coding	solute carrier family 25, member 27 [Source:MGI Symbol;Acc:MGI:1921261]	-2.94979	-1.56062	-2.20357	-0.917655	1.83105e-05	5.33497e-05
ENSMUSG00000008090	116701	Fgfrl1	protein_coding	fibroblast growth factor receptor-like 1 [Source:MGI Symbol;Acc:MGI:2150920]	-2.27728	-1.18731	-1.67599	-0.698641	1.80344e-05	5.26229e-05
ENSMUSG00000042708	71836	Shcbp1l	protein_coding	Shc SH2-domain binding protein 1-like [Source:MGI Symbol;Acc:MGI:1919086]	-2.12036	-1.08431	-1.52499	-0.643632	1.48725e-05	4.41019e-05
ENSMUSG00000005465	50931	Il27ra	protein_coding	interleukin 27 receptor, alpha [Source:MGI Symbol;Acc:MGI:1355318]	-2.00125	-1.0009	-1.40689	-0.59491	1.44344e-05	4.28967e-05
ENSMUSG00000036882	233071	Arhgap33	protein_coding	Rho GTPase activating protein 33 [Source:MGI Symbol;Acc:MGI:2673998]	-3.00085	-1.58537	-2.22757	-0.943166	1.41389e-05	4.20819e-05
ENSMUSG00000037994	97086	Slc9b2	protein_coding	solute carrier family 9, subfamily B (NHA2, cation proton antiporter 2), member 2 [Source:MGI Symbol;Acc:MGI:2140077]	-2.11127	-1.07811	-1.51112	-0.645103	1.23855e-05	3.72077e-05
ENSMUSG00000029287	21814	Tgfbr3	protein_coding	transforming growth factor, beta receptor III [Source:MGI Symbol;Acc:MGI:104637]	-3.22523	-1.6894	-2.36244	-1.01637	1.09065e-05	3.30084e-05
ENSMUSG00000029602	19415	Rasal1	protein_coding	RAS protein activator like 1 (GAP1 like) [Source:MGI Symbol;Acc:MGI:1330842]	-3.84583	-1.94329	-2.7174	-1.16918	1.08907e-05	3.29676e-05
ENSMUSG00000069301	319167	Hist1h2ag	protein_coding	histone cluster 1, H2ag [Source:MGI Symbol;Acc:MGI:2448293]	-2.33216	-1.22167	-1.70295	-0.740382	9.13848e-06	2.79141e-05
ENSMUSG00000049916	70458	2610318N02Rik	protein_coding	RIKEN cDNA 2610318N02 gene [Source:MGI Symbol;Acc:MGI:1917708]	-2.65387	-1.4081	-1.96096	-0.855242	8.65835e-06	2.65446e-05
ENSMUSG00000049001	68169	Ndnf	protein_coding	neuron-derived neurotrophic factor [Source:MGI Symbol;Acc:MGI:1915419]	-5.66427	-2.50189	-3.48092	-1.52286	8.20758e-06	2.52322e-05
ENSMUSG00000050382	16576	Kif7	protein_coding	kinesin family member 7 [Source:MGI Symbol;Acc:MGI:1098239]	-2.59047	-1.37321	-1.90872	-0.837705	7.76435e-06	2.39923e-05
ENSMUSG00000022861	110197	Dgkg	protein_coding	diacylglycerol kinase, gamma [Source:MGI Symbol;Acc:MGI:105060]	-8.48736	-3.08532	-4.28564	-1.885	7.47279e-06	2.31482e-05
ENSMUSG00000045273	26886	Cenph	protein_coding	centromere protein H [Source:MGI Symbol;Acc:MGI:1349448]	-3.70335	-1.88883	-2.6211	-1.15657	7.06123e-06	2.19372e-05
ENSMUSG00000032113	12649	Chek1	protein_coding	checkpoint kinase 1 [Source:MGI Symbol;Acc:MGI:1202065]	-3.72785	-1.89834	-2.63285	-1.16384	6.83893e-06	2.13089e-05
ENSMUSG00000035109	271849	Shc4	protein_coding	SHC (Src homology 2 domain containing) family, member 4 [Source:MGI Symbol;Acc:MGI:2655364]	-2.41746	-1.27349	-1.76432	-0.782662	6.42074e-06	2.00737e-05
ENSMUSG00000041729	235431	Coro2b	protein_coding	coronin, actin binding protein, 2B [Source:MGI Symbol;Acc:MGI:2444283]	-5.16562	-2.36894	-3.27682	-1.46106	5.85291e-06	1.83899e-05
ENSMUSG00000052271	17341	Bhlha15	protein_coding	basic helix-loop-helix family, member a15 [Source:MGI Symbol;Acc:MGI:891976]	-2.11263	-1.07904	-1.49251	-0.665569	5.83819e-06	1.8352e-05
ENSMUSG00000025912	17864	Mybl1	protein_coding	myeloblastosis oncogene-like 1 [Source:MGI Symbol;Acc:MGI:99925]	-2.17405	-1.12038	-1.54762	-0.693153	5.38933e-06	1.70457e-05
ENSMUSG00000040658	381101	Dnph1	protein_coding	2'-deoxynucleoside 5'-phosphate N-hydrolase 1 [Source:MGI Symbol;Acc:MGI:3039376]	-2.33842	-1.22554	-1.68952	-0.761555	4.78455e-06	1.52129e-05
ENSMUSG00000001827	14275	Folr1	protein_coding	folate receptor 1 (adult) [Source:MGI Symbol;Acc:MGI:95568]	-2.63617	-1.39844	-1.92692	-0.86996	4.64227e-06	1.48013e-05
ENSMUSG00000022034	71988	Esco2	protein_coding	establishment of sister chromatid cohesion N-acetyltransferase 2 [Source:MGI Symbol;Acc:MGI:1919238]	-2.79804	-1.48442	-2.04455	-0.924283	4.52791e-06	1.44533e-05
ENSMUSG00000046295	234396	Ankle1	protein_coding	ankyrin repeat and LEM domain containing 1 [Source:MGI Symbol;Acc:MGI:1918775]	-4.02074	-2.00746	-2.7636	-1.25132	4.39407e-06	1.40553e-05
ENSMUSG00000062661	14299	Ncs1	protein_coding	neuronal calcium sensor 1 [Source:MGI Symbol;Acc:MGI:109166]	-2.63475	-1.39767	-1.92313	-0.872201	4.25847e-06	1.36722e-05
ENSMUSG00000020312	216148	Shc2	protein_coding	SHC (Src homology 2 domain containing) transforming protein 2 [Source:MGI Symbol;Acc:MGI:106180]	-2.48744	-1.31466	-1.80773	-0.821596	4.0894e-06	1.31538e-05
ENSMUSG00000030091	54563	Nup210	protein_coding	nucleoporin 210 [Source:MGI Symbol;Acc:MGI:1859555]	-2.17338	-1.11994	-1.53838	-0.701497	3.83631e-06	1.23858e-05
ENSMUSG00000025815	209692	Dhtkd1	protein_coding	dehydrogenase E1 and transketolase domain containing 1 [Source:MGI Symbol;Acc:MGI:2445096]	-3.2013	-1.67866	-2.30542	-1.0519	3.7914e-06	1.22551e-05
ENSMUSG00000027115	228421	Kif18a	protein_coding	kinesin family member 18A [Source:MGI Symbol;Acc:MGI:2446977]	-2.79239	-1.4815	-2.03287	-0.930128	3.59091e-06	1.1637e-05
ENSMUSG00000030309	232560	Caprin2	protein_coding	caprin family member 2 [Source:MGI Symbol;Acc:MGI:2448541]	-2.11273	-1.07911	-1.48044	-0.677769	3.54953e-06	1.15137e-05
ENSMUSG00000034311	16571	Kif4	protein_coding	kinesin family member 4 [Source:MGI Symbol;Acc:MGI:108389]	-2.14691	-1.10226	-1.51146	-0.693066	3.44062e-06	1.11788e-05
ENSMUSG00000038379	22137	Ttk	protein_coding	Ttk protein kinase [Source:MGI Symbol;Acc:MGI:1194921]	-2.39502	-1.26004	-1.72272	-0.797352	2.85539e-06	9.37425e-06
ENSMUSG00000033762	79456	Recql4	protein_coding	RecQ protein-like 4 [Source:MGI Symbol;Acc:MGI:1931028]	-2.05189	-1.03695	-1.41708	-0.656825	2.77403e-06	9.12882e-06
ENSMUSG00000074269	73673	Rec114	protein_coding	REC114 meiotic recombination protein [Source:MGI Symbol;Acc:MGI:1920923]	-2.00801	-1.00577	-1.37355	-0.637989	2.65765e-06	8.76546e-06
ENSMUSG00000030433	381836	Sbk2	protein_coding	SH3-binding domain kinase family, member 2 [Source:MGI Symbol;Acc:MGI:2685925]	-2.3833	-1.25296	-1.71075	-0.79517	2.61973e-06	8.64986e-06
ENSMUSG00000041731	226041	Pgm5	protein_coding	phosphoglucomutase 5 [Source:MGI Symbol;Acc:MGI:1925668]	-3.12912	-1.64576	-2.24266	-1.04886	2.30666e-06	7.66373e-06
ENSMUSG00000034295	225288	Fhod3	protein_coding	formin homology 2 domain containing 3 [Source:MGI Symbol;Acc:MGI:1925847]	-4.36762	-2.12685	-2.89773	-1.35596	2.28067e-06	7.58652e-06
ENSMUSG00000027478	13436	Dnmt3b	protein_coding	DNA methyltransferase 3B [Source:MGI Symbol;Acc:MGI:1261819]	-2.24487	-1.16663	-1.58943	-0.743829	2.27615e-06	7.57328e-06
ENSMUSG00000022033	52033	Pbk	protein_coding	PDZ binding kinase [Source:MGI Symbol;Acc:MGI:1289156]	-3.61179	-1.85272	-2.5192	-1.18623	1.99948e-06	6.70275e-06
ENSMUSG00000017499	23834	Cdc6	protein_coding	cell division cycle 6 [Source:MGI Symbol;Acc:MGI:1345150]	-2.15774	-1.10952	-1.50718	-0.711864	1.87369e-06	6.30398e-06
ENSMUSG00000036949	277468	Slc39a12	protein_coding	solute carrier family 39 (zinc transporter), member 12 [Source:MGI Symbol;Acc:MGI:2139274]	-3.35366	-1.74574	-2.37034	-1.12113	1.81773e-06	6.12019e-06
ENSMUSG00000045103	13405	Dmd	protein_coding	dystrophin, muscular dystrophy [Source:MGI Symbol;Acc:MGI:94909]	-8.12944	-3.02316	-4.10305	-1.94326	1.7664e-06	5.96479e-06
ENSMUSG00000032530	69032	Lyzl4	protein_coding	lysozyme-like 4 [Source:MGI Symbol;Acc:MGI:1916282]	-3.68538	-1.88181	-2.55332	-1.21031	1.73452e-06	5.86794e-06
ENSMUSG00000046591	77011	Ticrr	protein_coding	TOPBP1-interacting checkpoint and replication regulator [Source:MGI Symbol;Acc:MGI:1924261]	-2.46873	-1.30377	-1.76876	-0.838781	1.71816e-06	5.81609e-06
ENSMUSG00000006221	29818	Hspb7	protein_coding	heat shock protein family, member 7 (cardiovascular) [Source:MGI Symbol;Acc:MGI:1352494]	-4.80181	-2.26358	-3.06956	-1.45759	1.66919e-06	5.65724e-06
ENSMUSG00000006235	13857	Epor	protein_coding	erythropoietin receptor [Source:MGI Symbol;Acc:MGI:95408]	-10.8817	-3.44384	-4.65542	-2.23225	1.34733e-06	4.62074e-06
ENSMUSG00000028555	230603	Ttc39a	protein_coding	tetratricopeptide repeat domain 39A [Source:MGI Symbol;Acc:MGI:2444350]	-2.38401	-1.25339	-1.69294	-0.813833	1.27246e-06	4.38138e-06
ENSMUSG00000050394	278097	Armcx6	protein_coding	armadillo repeat containing, X-linked 6 [Source:MGI Symbol;Acc:MGI:2147993]	-3.30441	-1.72439	-2.32648	-1.12231	1.17574e-06	4.06148e-06
ENSMUSG00000074780	NA	Anapc15-ps	protein_coding	anaphase prompoting complex C subunit 15, pseudogene [Source:MGI Symbol;Acc:MGI:3646302]	-5.97764	-2.57958	-3.47249	-1.68666	1.0048e-06	3.49719e-06
ENSMUSG00000064360	17718	mt-Nd3	protein_coding	mitochondrially encoded NADH dehydrogenase 3 [Source:MGI Symbol;Acc:MGI:102499]	-2.52491	-1.33623	-1.79591	-0.876549	8.97382e-07	3.1455e-06
ENSMUSG00000030409	13400	Dmpk	protein_coding	dystrophia myotonica-protein kinase [Source:MGI Symbol;Acc:MGI:94906]	-2.71533	-1.44112	-1.9365	-0.945756	8.8427e-07	3.10426e-06
ENSMUSG00000055210	17301	Foxd2	protein_coding	forkhead box D2 [Source:MGI Symbol;Acc:MGI:1347471]	-2.3918	-1.25809	-1.68874	-0.827448	8.18688e-07	2.88428e-06
ENSMUSG00000000028	12544	Cdc45	protein_coding	cell division cycle 45 [Source:MGI Symbol;Acc:MGI:1338073]	-2.22643	-1.15474	-1.54389	-0.765582	6.13009e-07	2.19376e-06
ENSMUSG00000020600	328059	Slc7a15	protein_coding	solute carrier family 7 (cationic amino acid transporter, y+ system), member 15 [Source:MGI Symbol;Acc:MGI:3045351]	-2.33786	-1.22519	-1.63723	-0.81314	5.89831e-07	2.11959e-06
ENSMUSG00000030147	69810	Clec4b1	protein_coding	C-type lectin domain family 4, member b1 [Source:MGI Symbol;Acc:MGI:1917060]	-2.97961	-1.57512	-2.10382	-1.04642	5.68577e-07	2.0496e-06
ENSMUSG00000026274	269224	Pask	protein_coding	PAS domain containing serine/threonine kinase [Source:MGI Symbol;Acc:MGI:2155936]	-2.23829	-1.1624	-1.55141	-0.773389	5.3773e-07	1.94551e-06
ENSMUSG00000041930	433940	Fam222a	protein_coding	family with sequence similarity 222, member A [Source:MGI Symbol;Acc:MGI:3605543]	-2.47833	-1.30937	-1.74563	-0.87311	4.94641e-07	1.80045e-06
ENSMUSG00000046442	320472	Ppm1e	protein_coding	protein phosphatase 1E (PP2C domain containing) [Source:MGI Symbol;Acc:MGI:2444096]	-2.64804	-1.40493	-1.87264	-0.937208	4.87094e-07	1.77578e-06
ENSMUSG00000027203	110074	Dut	protein_coding	deoxyuridine triphosphatase [Source:MGI Symbol;Acc:MGI:1346051]	-2.13893	-1.09689	-1.45963	-0.734139	4.29344e-07	1.5794e-06
ENSMUSG00000054871	72309	Tmem158	protein_coding	transmembrane protein 158 [Source:MGI Symbol;Acc:MGI:1919559]	-2.61453	-1.38655	-1.84245	-0.930658	3.84407e-07	1.42386e-06
ENSMUSG00000039187	208836	Fanci	protein_coding	Fanconi anemia, complementation group I [Source:MGI Symbol;Acc:MGI:2384790]	-2.70007	-1.433	-1.90383	-0.962165	3.79243e-07	1.40632e-06
ENSMUSG00000052911	16779	Lamb2	protein_coding	laminin, beta 2 [Source:MGI Symbol;Acc:MGI:99916]	-2.14519	-1.1011	-1.46068	-0.741524	3.37223e-07	1.25842e-06
ENSMUSG00000051611	258096	Olfr112	protein_coding	olfactory receptor 112 [Source:MGI Symbol;Acc:MGI:2177495]	-4.41515	-2.14246	-2.83908	-1.44584	3.10104e-07	1.16493e-06
ENSMUSG00000039396	234258	Neil3	protein_coding	nei like 3 (E. coli) [Source:MGI Symbol;Acc:MGI:2384588]	-3.99924	-1.99972	-2.642	-1.35745	2.44246e-07	9.28376e-07
ENSMUSG00000030346	19362	Rad51ap1	protein_coding	RAD51 associated protein 1 [Source:MGI Symbol;Acc:MGI:1098224]	-3.04223	-1.60513	-2.12054	-1.08972	2.42998e-07	9.24394e-07
ENSMUSG00000049709	244202	Nlrp10	protein_coding	NLR family, pyrin domain containing 10 [Source:MGI Symbol;Acc:MGI:2444084]	-2.86002	-1.51603	-1.99794	-1.03412	1.99257e-07	7.675e-07
ENSMUSG00000036641	227933	Ccdc148	protein_coding	coiled-coil domain containing 148 [Source:MGI Symbol;Acc:MGI:3039583]	-2.95977	-1.56548	-2.06261	-1.06836	1.95319e-07	7.53171e-07
ENSMUSG00000062727	319184	Hist1h2bk	protein_coding	histone cluster 1, H2bk [Source:MGI Symbol;Acc:MGI:2448399]	-2.39885	-1.26234	-1.66205	-0.862637	1.84455e-07	7.13781e-07
ENSMUSG00000044433	69697	Camsap3	protein_coding	calmodulin regulated spectrin-associated protein family, member 3 [Source:MGI Symbol;Acc:MGI:1916947]	-3.55999	-1.83187	-2.41145	-1.25229	1.81595e-07	7.03585e-07
ENSMUSG00000032911	121021	Cspg4	protein_coding	chondroitin sulfate proteoglycan 4 [Source:MGI Symbol;Acc:MGI:2153093]	-6.77811	-2.76088	-3.63364	-1.88813	1.78501e-07	6.92178e-07
ENSMUSG00000042810	77827	Krba1	protein_coding	KRAB-A domain containing 1 [Source:MGI Symbol;Acc:MGI:1925077]	-2.10505	-1.07386	-1.41276	-0.734955	1.72742e-07	6.71352e-07
ENSMUSG00000033952	12316	Aspm	protein_coding	abnormal spindle microtubule assembly [Source:MGI Symbol;Acc:MGI:1334448]	-2.1194	-1.08366	-1.42393	-0.743381	1.56241e-07	6.10657e-07
ENSMUSG00000066510	330963	Ankdd1a	protein_coding	ankyrin repeat and death domain containing 1A [Source:MGI Symbol;Acc:MGI:2686319]	-3.69798	-1.88674	-2.47761	-1.29587	1.48126e-07	5.8058e-07
ENSMUSG00000038816	54366	Ctnnal1	protein_coding	catenin (cadherin associated protein), alpha-like 1 [Source:MGI Symbol;Acc:MGI:1859649]	-5.10891	-2.35302	-3.08723	-1.6188	1.37698e-07	5.42319e-07
ENSMUSG00000022235	69574	Cmbl	protein_coding	carboxymethylenebutenolidase-like (Pseudomonas) [Source:MGI Symbol;Acc:MGI:1916824]	-3.68556	-1.88188	-2.46801	-1.29575	1.32706e-07	5.24154e-07
ENSMUSG00000029869	13848	Ephb6	protein_coding	Eph receptor B6 [Source:MGI Symbol;Acc:MGI:1096338]	-3.77573	-1.91675	-2.51348	-1.32003	1.31537e-07	5.19833e-07
ENSMUSG00000094338	319185	Hist1h2bl	protein_coding	histone cluster 1, H2bl [Source:MGI Symbol;Acc:MGI:2448403]	-2.3986	-1.26219	-1.65391	-0.870478	1.23462e-07	4.8974e-07
ENSMUSG00000040016	19218	Ptger3	protein_coding	prostaglandin E receptor 3 (subtype EP3) [Source:MGI Symbol;Acc:MGI:97795]	-3.71994	-1.89528	-2.48332	-1.30724	1.22805e-07	4.87271e-07
ENSMUSG00000006378	26912	Gcat	protein_coding	glycine C-acetyltransferase (2-amino-3-ketobutyrate-coenzyme A ligase) [Source:MGI Symbol;Acc:MGI:1349389]	-2.20546	-1.14108	-1.49265	-0.789501	1.06643e-07	4.26573e-07
ENSMUSG00000002055	54141	Spag5	protein_coding	sperm associated antigen 5 [Source:MGI Symbol;Acc:MGI:1927470]	-2.11893	-1.08333	-1.41658	-0.750092	1.03174e-07	4.13655e-07
ENSMUSG00000041594	70551	Tmtc4	protein_coding	transmembrane and tetratricopeptide repeat containing 4 [Source:MGI Symbol;Acc:MGI:1921050]	-2.0397	-1.02835	-1.34302	-0.713689	9.26461e-08	3.73502e-07
ENSMUSG00000049281	235281	Scn3b	protein_coding	sodium channel, voltage-gated, type III, beta [Source:MGI Symbol;Acc:MGI:1918882]	-2.15854	-1.11005	-1.44954	-0.770571	9.16414e-08	3.69882e-07
ENSMUSG00000015222	17756	Map2	protein_coding	microtubule-associated protein 2 [Source:MGI Symbol;Acc:MGI:97175]	-9.78518	-3.2906	-4.29323	-2.28796	8.49586e-08	3.44014e-07
ENSMUSG00000038486	64051	Sv2a	protein_coding	synaptic vesicle glycoprotein 2 a [Source:MGI Symbol;Acc:MGI:1927139]	-2.68986	-1.42753	-1.85921	-0.99585	7.26965e-08	2.96796e-07
ENSMUSG00000062980	214642	Cped1	protein_coding	cadherin-like and PC-esterase domain containing 1 [Source:MGI Symbol;Acc:MGI:2444814]	-3.11403	-1.63878	-2.13334	-1.14422	6.97203e-08	2.85319e-07
ENSMUSG00000036330	110877	Slc18a1	protein_coding	solute carrier family 18 (vesicular monoamine), member 1 [Source:MGI Symbol;Acc:MGI:106684]	-2.85384	-1.5129	-1.96914	-1.05667	6.86563e-08	2.81131e-07
ENSMUSG00000049526	73893	Tmem202	protein_coding	transmembrane protein 202 [Source:MGI Symbol;Acc:MGI:1921143]	-9.60652	-3.26401	-4.23411	-2.29392	5.07244e-08	2.11397e-07
ENSMUSG00000030029	16206	Lrig1	protein_coding	leucine-rich repeats and immunoglobulin-like domains 1 [Source:MGI Symbol;Acc:MGI:107935]	-4.75869	-2.25056	-2.91494	-1.58619	4.39925e-08	1.84398e-07
ENSMUSG00000071724	100503915	Smpd5	protein_coding	sphingomyelin phosphodiesterase 5 [Source:MGI Symbol;Acc:MGI:3709877]	-2.98043	-1.57552	-2.03844	-1.1126	3.98346e-08	1.68039e-07
ENSMUSG00000028358	72701	Zfp618	protein_coding	zinc finger protein 618 [Source:MGI Symbol;Acc:MGI:1919950]	-3.22406	-1.68888	-2.18225	-1.19551	3.52442e-08	1.49404e-07
ENSMUSG00000037852	12876	Cpe	protein_coding	carboxypeptidase E [Source:MGI Symbol;Acc:MGI:101932]	-2.17382	-1.12023	-1.44626	-0.794208	3.2538e-08	1.38612e-07
ENSMUSG00000031432	19139	Prps1	protein_coding	phosphoribosyl pyrophosphate synthetase 1 [Source:MGI Symbol;Acc:MGI:97775]	-2.02728	-1.01955	-1.31604	-0.723057	3.19968e-08	1.36433e-07
ENSMUSG00000026435	212980	Slc45a3	protein_coding	solute carrier family 45, member 3 [Source:MGI Symbol;Acc:MGI:1922082]	-5.74014	-2.52108	-3.25347	-1.7887	3.12991e-08	1.33623e-07
ENSMUSG00000053004	15465	Hrh1	protein_coding	histamine receptor H1 [Source:MGI Symbol;Acc:MGI:107619]	-4.13622	-2.04831	-2.64284	-1.45378	3.07256e-08	1.31418e-07
ENSMUSG00000054976	241134	Nyap2	protein_coding	neuronal tyrosine-phophorylated phosphoinositide 3-kinase adaptor 2 [Source:MGI Symbol;Acc:MGI:2443135]	-7.98647	-2.99756	-3.85916	-2.13596	2.49206e-08	1.07924e-07
ENSMUSG00000067199	14296	Frat1	protein_coding	frequently rearranged in advanced T cell lymphomas [Source:MGI Symbol;Acc:MGI:109450]	-2.16279	-1.11289	-1.4314	-0.794387	2.27053e-08	9.89189e-08
ENSMUSG00000047604	212398	Frat2	protein_coding	frequently rearranged in advanced T cell lymphomas 2 [Source:MGI Symbol;Acc:MGI:2673967]	-2.04295	-1.03065	-1.32387	-0.737432	1.99584e-08	8.73646e-08
ENSMUSG00000021587	18548	Pcsk1	protein_coding	proprotein convertase subtilisin/kexin type 1 [Source:MGI Symbol;Acc:MGI:97511]	-6.89015	-2.78453	-3.57171	-1.99737	1.73734e-08	7.65582e-08
ENSMUSG00000025747	22171	Tyms	protein_coding	thymidylate synthase [Source:MGI Symbol;Acc:MGI:98878]	-2.17383	-1.12024	-1.4361	-0.804372	1.64181e-08	7.25797e-08
ENSMUSG00000024579	240334	Pcyox1l	protein_coding	prenylcysteine oxidase 1 like [Source:MGI Symbol;Acc:MGI:3606062]	-2.68534	-1.42511	-1.82561	-1.0246	1.52716e-08	6.77498e-08
ENSMUSG00000019214	214901	Chtf18	protein_coding	CTF18, chromosome transmission fidelity factor 18 [Source:MGI Symbol;Acc:MGI:2384887]	-2.51813	-1.33235	-1.70611	-0.958595	1.46774e-08	6.51556e-08
ENSMUSG00000075031	319178	Hist1h2bb	protein_coding	histone cluster 1, H2bb [Source:MGI Symbol;Acc:MGI:2448377]	-2.28943	-1.19499	-1.53006	-0.859916	1.45304e-08	6.45653e-08
ENSMUSG00000029648	14254	Flt1	protein_coding	FMS-like tyrosine kinase 1 [Source:MGI Symbol;Acc:MGI:95558]	-2.60981	-1.38395	-1.77168	-0.996215	1.42673e-08	6.34979e-08
ENSMUSG00000026068	16174	Il18rap	protein_coding	interleukin 18 receptor accessory protein [Source:MGI Symbol;Acc:MGI:1338888]	-2.43566	-1.28431	-1.6434	-0.92522	1.36468e-08	6.08343e-08
ENSMUSG00000029283	12545	Cdc7	protein_coding	cell division cycle 7 (S. cerevisiae) [Source:MGI Symbol;Acc:MGI:1309511]	-2.66051	-1.4117	-1.80527	-1.01813	1.28043e-08	5.72819e-08
ENSMUSG00000004044	19285	Cavin1	protein_coding	caveolae associated 1 [Source:MGI Symbol;Acc:MGI:1277968]	-2.59635	-1.37649	-1.75908	-0.993897	1.19736e-08	5.37566e-08
ENSMUSG00000060275	100042150	Nrg2	protein_coding	neuregulin 2 [Source:MGI Symbol;Acc:MGI:1098246]	-3.10005	-1.63229	-2.08459	-1.17999	1.1186e-08	5.04994e-08
ENSMUSG00000072949	26897	Acot1	protein_coding	acyl-CoA thioesterase 1 [Source:MGI Symbol;Acc:MGI:1349396]	-7.82156	-2.96746	-3.78409	-2.15082	9.60081e-09	4.36854e-08
ENSMUSG00000023826	50873	Prkn	protein_coding	parkin RBR E3 ubiquitin protein ligase [Source:MGI Symbol;Acc:MGI:1355296]	-2.09856	-1.0694	-1.36152	-0.777277	8.13291e-09	3.73008e-08
ENSMUSG00000006344	23887	Ggt5	protein_coding	gamma-glutamyltransferase 5 [Source:MGI Symbol;Acc:MGI:1346063]	-3.24047	-1.6962	-2.15906	-1.23334	7.94529e-09	3.64645e-08
ENSMUSG00000020282	13650	Rhbdf1	protein_coding	rhomboid 5 homolog 1 [Source:MGI Symbol;Acc:MGI:104328]	-3.69714	-1.88641	-2.39978	-1.37304	7.47488e-09	3.44083e-08
ENSMUSG00000019478	19341	Rab4a	protein_coding	RAB4A, member RAS oncogene family [Source:MGI Symbol;Acc:MGI:105069]	-2.09331	-1.06579	-1.35525	-0.776328	7.14353e-09	3.29929e-08
ENSMUSG00000031383	75590	Dusp9	protein_coding	dual specificity phosphatase 9 [Source:MGI Symbol;Acc:MGI:2387107]	-4.10564	-2.03761	-2.58899	-1.48622	6.57847e-09	3.05054e-08
ENSMUSG00000022893	11504	Adamts1	protein_coding	a disintegrin-like and metallopeptidase (reprolysin type) with thrombospondin type 1 motif, 1 [Source:MGI Symbol;Acc:MGI:109249]	-3.2884	-1.71739	-2.18196	-1.25281	6.53079e-09	3.02945e-08
ENSMUSG00000051278	71643	Zgrf1	protein_coding	zinc finger, GRF-type containing 1 [Source:MGI Symbol;Acc:MGI:1918893]	-2.01313	-1.00944	-1.28234	-0.736544	6.43824e-09	2.98852e-08
ENSMUSG00000079049	380839	Serpinb1c	protein_coding	serine (or cysteine) peptidase inhibitor, clade B, member 1c [Source:MGI Symbol;Acc:MGI:2445363]	-3.46394	-1.79242	-2.27642	-1.30841	6.2704e-09	2.91355e-08
ENSMUSG00000050530	269233	Fam171a1	protein_coding	family with sequence similarity 171, member A1 [Source:MGI Symbol;Acc:MGI:2442917]	-2.55737	-1.35466	-1.71899	-0.99033	5.72421e-09	2.68411e-08
ENSMUSG00000040204	68026	Pclaf	protein_coding	PCNA clamp associated factor [Source:MGI Symbol;Acc:MGI:1915276]	-2.50981	-1.32758	-1.68393	-0.971219	5.47884e-09	2.57779e-08
ENSMUSG00000027692	665113	Tnik	protein_coding	TRAF2 and NCK interacting kinase [Source:MGI Symbol;Acc:MGI:1916264]	-3.89952	-1.9633	-2.48822	-1.43837	5.0071e-09	2.36712e-08
ENSMUSG00000069265	360198	Hist1h3a	protein_coding	histone cluster 1, H3a [Source:MGI Symbol;Acc:MGI:2668828]	-2.31482	-1.2109	-1.53369	-0.888121	4.67425e-09	2.21963e-08
ENSMUSG00000021186	23876	Fbln5	protein_coding	fibulin 5 [Source:MGI Symbol;Acc:MGI:1346091]	-27.9108	-4.80275	-6.07965	-3.52585	4.40332e-09	2.1018e-08
ENSMUSG00000099517	97908	Hist1h3g	protein_coding	histone cluster 1, H3g [Source:MGI Symbol;Acc:MGI:2145541]	-3.44281	-1.78359	-2.25685	-1.31033	4.2074e-09	2.01176e-08
ENSMUSG00000039748	26909	Exo1	protein_coding	exonuclease 1 [Source:MGI Symbol;Acc:MGI:1349427]	-3.40015	-1.7656	-2.23401	-1.29718	4.19341e-09	2.00576e-08
ENSMUSG00000031861	53978	Lpar2	protein_coding	lysophosphatidic acid receptor 2 [Source:MGI Symbol;Acc:MGI:1858422]	-4.04072	-2.01461	-2.548	-1.48123	4.00061e-09	1.91885e-08
ENSMUSG00000065947	17720	mt-Nd4l	protein_coding	mitochondrially encoded NADH dehydrogenase 4L [Source:MGI Symbol;Acc:MGI:102497]	-2.1424	-1.09922	-1.38913	-0.809318	3.66031e-09	1.76481e-08
ENSMUSG00000022240	18163	Ctnnd2	protein_coding	catenin (cadherin associated protein), delta 2 [Source:MGI Symbol;Acc:MGI:1195966]	-2.1421	-1.09903	-1.3887	-0.809358	3.60697e-09	1.74284e-08
ENSMUSG00000021707	13361	Dhfr	protein_coding	dihydrofolate reductase [Source:MGI Symbol;Acc:MGI:94890]	-2.70155	-1.43379	-1.81115	-1.05642	3.49071e-09	1.69248e-08
ENSMUSG00000039485	72480	Tspyl4	protein_coding	TSPY-like 4 [Source:MGI Symbol;Acc:MGI:106393]	-2.33901	-1.22589	-1.54817	-0.903618	3.39884e-09	1.64967e-08
ENSMUSG00000007039	51793	Ddah2	protein_coding	dimethylarginine dimethylaminohydrolase 2 [Source:MGI Symbol;Acc:MGI:1859016]	-2.29853	-1.20071	-1.51439	-0.887038	2.93759e-09	1.4374e-08
ENSMUSG00000027323	19361	Rad51	protein_coding	RAD51 recombinase [Source:MGI Symbol;Acc:MGI:97890]	-3.13476	-1.64836	-2.07589	-1.22082	2.48541e-09	1.22876e-08
ENSMUSG00000079445	227327	B3gnt7	protein_coding	UDP-GlcNAc:betaGal beta-1,3-N-acetylglucosaminyltransferase 7 [Source:MGI Symbol;Acc:MGI:2384394]	-12.3058	-3.62127	-4.55611	-2.68643	2.22714e-09	1.10542e-08
ENSMUSG00000025395	19075	Prim1	protein_coding	DNA primase, p49 subunit [Source:MGI Symbol;Acc:MGI:97757]	-2.29439	-1.19811	-1.50702	-0.889196	2.16339e-09	1.07609e-08
ENSMUSG00000005233	66442	Spc25	protein_coding	SPC25, NDC80 kinetochore complex component, homolog (S. cerevisiae) [Source:MGI Symbol;Acc:MGI:1913692]	-2.34999	-1.23265	-1.55047	-0.914838	2.16264e-09	1.07609e-08
ENSMUSG00000030711	20887	Sult1a1	protein_coding	sulfotransferase family 1A, phenol-preferring, member 1 [Source:MGI Symbol;Acc:MGI:102896]	-3.17579	-1.66712	-2.0945	-1.23974	1.89109e-09	9.45753e-09
ENSMUSG00000034206	77782	Polq	protein_coding	polymerase (DNA directed), theta [Source:MGI Symbol;Acc:MGI:2155399]	-2.53853	-1.34399	-1.6872	-1.00079	1.72535e-09	8.67884e-09
ENSMUSG00000051220	236930	Ercc6l	protein_coding	excision repair cross-complementing rodent repair deficiency complementation group 6 like [Source:MGI Symbol;Acc:MGI:2654144]	-2.64691	-1.40431	-1.7628	-1.04582	1.71217e-09	8.61884e-09
ENSMUSG00000018417	17912	Myo1b	protein_coding	myosin IB [Source:MGI Symbol;Acc:MGI:107752]	-2.02745	-1.01967	-1.27984	-0.759498	1.69207e-09	8.52596e-09
ENSMUSG00000022793	56375	B4galt4	protein_coding	UDP-Gal:betaGlcNAc beta 1,4-galactosyltransferase, polypeptide 4 [Source:MGI Symbol;Acc:MGI:1928387]	-2.19495	-1.13419	-1.42327	-0.845108	1.64971e-09	8.32564e-09
ENSMUSG00000044749	76184	Abca6	protein_coding	ATP-binding cassette, sub-family A (ABC1), member 6 [Source:MGI Symbol;Acc:MGI:1923434]	-2.84477	-1.50831	-1.88994	-1.12668	1.38709e-09	7.04655e-09
ENSMUSG00000031778	20312	Cx3cl1	protein_coding	chemokine (C-X3-C motif) ligand 1 [Source:MGI Symbol;Acc:MGI:1097153]	-2.77602	-1.47302	-1.84487	-1.10117	1.31384e-09	6.70398e-09
ENSMUSG00000026630	381319	Batf3	protein_coding	basic leucine zipper transcription factor, ATF-like 3 [Source:MGI Symbol;Acc:MGI:1925491]	-4.65683	-2.21935	-2.77745	-1.66124	1.19901e-09	6.14297e-09
ENSMUSG00000035448	12771	Ccr3	protein_coding	chemokine (C-C motif) receptor 3 [Source:MGI Symbol;Acc:MGI:104616]	-2.59124	-1.37365	-1.71841	-1.02888	1.14465e-09	5.87534e-09
ENSMUSG00000029765	243743	Plxna4	protein_coding	plexin A4 [Source:MGI Symbol;Acc:MGI:2179061]	-3.57188	-1.83668	-2.29748	-1.37588	1.13422e-09	5.82616e-09
ENSMUSG00000026069	17082	Il1rl1	protein_coding	interleukin 1 receptor-like 1 [Source:MGI Symbol;Acc:MGI:98427]	-11.3054	-3.49894	-4.37594	-2.62194	1.10867e-09	5.69917e-09
ENSMUSG00000078532	67149	Nkain1	protein_coding	Na+/K+ transporting ATPase interacting 1 [Source:MGI Symbol;Acc:MGI:1914399]	-2.04815	-1.03432	-1.29233	-0.776324	9.87503e-10	5.11622e-09
ENSMUSG00000009614	192166	Sardh	protein_coding	sarcosine dehydrogenase [Source:MGI Symbol;Acc:MGI:2183102]	-31.2822	-4.96727	-6.20352	-3.73102	9.35642e-10	4.86942e-09
ENSMUSG00000027961	109245	Lrrc39	protein_coding	leucine rich repeat containing 39 [Source:MGI Symbol;Acc:MGI:1924557]	-4.62545	-2.2096	-2.75827	-1.66092	8.85935e-10	4.62116e-09
ENSMUSG00000023993	71326	Treml1	protein_coding	triggering receptor expressed on myeloid cells-like 1 [Source:MGI Symbol;Acc:MGI:1918576]	-2.45735	-1.2971	-1.61757	-0.976637	7.84438e-10	4.11503e-09
ENSMUSG00000025577	12416	Cbx2	protein_coding	chromobox 2 [Source:MGI Symbol;Acc:MGI:88289]	-2.65685	-1.40972	-1.75408	-1.06535	5.96175e-10	3.15858e-09
ENSMUSG00000004347	18575	Pde1c	protein_coding	phosphodiesterase 1C [Source:MGI Symbol;Acc:MGI:108413]	-13.4138	-3.74565	-4.65817	-2.83313	5.5836e-10	2.96962e-09
ENSMUSG00000063564	237759	Col23a1	protein_coding	collagen, type XXIII, alpha 1 [Source:MGI Symbol;Acc:MGI:2653243]	-2.98611	-1.57827	-1.96259	-1.19395	5.51976e-10	2.94019e-09
ENSMUSG00000002104	19400	Rapsn	protein_coding	receptor-associated protein of the synapse [Source:MGI Symbol;Acc:MGI:99422]	-2.03286	-1.02351	-1.27131	-0.775712	4.79452e-10	2.56872e-09
ENSMUSG00000032827	243725	Ppp1r9a	protein_coding	protein phosphatase 1, regulatory subunit 9A [Source:MGI Symbol;Acc:MGI:2442401]	-2.10546	-1.07414	-1.33342	-0.814845	4.46109e-10	2.40124e-09
ENSMUSG00000040957	63955	Cables1	protein_coding	CDK5 and Abl enzyme substrate 1 [Source:MGI Symbol;Acc:MGI:1927065]	-6.13111	-2.61615	-3.24378	-1.98851	3.83383e-10	2.08225e-09
ENSMUSG00000048078	23966	Tenm4	protein_coding	teneurin transmembrane protein 4 [Source:MGI Symbol;Acc:MGI:2447063]	-4.01636	-2.00589	-2.48529	-1.52649	3.49041e-10	1.90171e-09
ENSMUSG00000032656	320253	44623	protein_coding	membrane-associated ring finger (C3HC4) 3 [Source:MGI Symbol;Acc:MGI:2443667]	-4.4303	-2.1474	-2.66059	-1.63422	3.48367e-10	1.89954e-09
ENSMUSG00000033209	209683	Ttc28	protein_coding	tetratricopeptide repeat domain 28 [Source:MGI Symbol;Acc:MGI:2140873]	-2.04627	-1.033	-1.27933	-0.78666	3.3045e-10	1.80468e-09
ENSMUSG00000003153	20527	Slc2a3	protein_coding	solute carrier family 2 (facilitated glucose transporter), member 3 [Source:MGI Symbol;Acc:MGI:95757]	-2.43065	-1.28134	-1.58607	-0.976605	3.09141e-10	1.69702e-09
ENSMUSG00000032826	109676	Ank2	protein_coding	ankyrin 2, brain [Source:MGI Symbol;Acc:MGI:88025]	-2.13575	-1.09474	-1.35482	-0.834668	3.00914e-10	1.65712e-09
ENSMUSG00000036459	101543	Wtip	protein_coding	WT1-interacting protein [Source:MGI Symbol;Acc:MGI:2141920]	-3.1001	-1.63231	-2.01847	-1.24616	2.71154e-10	1.50101e-09
ENSMUSG00000000881	53310	Dlg3	protein_coding	discs large MAGUK scaffold protein 3 [Source:MGI Symbol;Acc:MGI:1888986]	-3.56416	-1.83356	-2.2634	-1.40372	2.16182e-10	1.20903e-09
ENSMUSG00000018012	170758	Rac3	protein_coding	Rac family small GTPase 3 [Source:MGI Symbol;Acc:MGI:2180784]	-2.29352	-1.19756	-1.47799	-0.917132	2.10229e-10	1.1779e-09
ENSMUSG00000041147	12190	Brca2	protein_coding	breast cancer 2, early onset [Source:MGI Symbol;Acc:MGI:109337]	-2.01879	-1.01349	-1.2505	-0.776484	2.03293e-10	1.14274e-09
ENSMUSG00000038204	117590	Asb10	protein_coding	ankyrin repeat and SOCS box-containing 10 [Source:MGI Symbol;Acc:MGI:2152836]	-20.6742	-4.36976	-5.38764	-3.35187	1.84301e-10	1.04191e-09
ENSMUSG00000032841	72446	Prr5l	protein_coding	proline rich 5 like [Source:MGI Symbol;Acc:MGI:1919696]	-2.41182	-1.27012	-1.56499	-0.975259	1.69329e-10	9.612e-10
ENSMUSG00000046186	235505	Cd109	protein_coding	CD109 antigen [Source:MGI Symbol;Acc:MGI:2445221]	-2.22104	-1.15123	-1.41825	-0.884215	1.65465e-10	9.40811e-10
ENSMUSG00000012443	16551	Kif11	protein_coding	kinesin family member 11 [Source:MGI Symbol;Acc:MGI:1098231]	-2.44606	-1.29046	-1.58957	-0.991342	1.62799e-10	9.27177e-10
ENSMUSG00000001552	16480	Jup	protein_coding	junction plakoglobin [Source:MGI Symbol;Acc:MGI:96650]	-2.05185	-1.03692	-1.27722	-0.796621	1.61979e-10	9.23645e-10
ENSMUSG00000047242	407786	Taf9b	protein_coding	TATA-box binding protein associated factor 9B [Source:MGI Symbol;Acc:MGI:3039562]	-2.13181	-1.09208	-1.345	-0.839159	1.59371e-10	9.09524e-10
ENSMUSG00000002799	16450	Jag2	protein_coding	jagged 2 [Source:MGI Symbol;Acc:MGI:1098270]	-3.2564	-1.70328	-2.09544	-1.31111	1.37502e-10	7.90591e-10
ENSMUSG00000010461	14051	Eya4	protein_coding	EYA transcriptional coactivator and phosphatase 4 [Source:MGI Symbol;Acc:MGI:1337104]	-2.24399	-1.16607	-1.43379	-0.898342	1.28056e-10	7.40592e-10
ENSMUSG00000017861	17865	Mybl2	protein_coding	myeloblastosis oncogene-like 2 [Source:MGI Symbol;Acc:MGI:101785]	-3.34479	-1.74192	-2.14117	-1.34266	1.22652e-10	7.11424e-10
ENSMUSG00000027715	12428	Ccna2	protein_coding	cyclin A2 [Source:MGI Symbol;Acc:MGI:108069]	-2.12351	-1.08645	-1.33479	-0.838113	1.14399e-10	6.65506e-10
ENSMUSG00000029414	208628	Kntc1	protein_coding	kinetochore associated 1 [Source:MGI Symbol;Acc:MGI:2673709]	-3.19346	-1.67512	-2.05678	-1.29346	1.05397e-10	6.14431e-10
ENSMUSG00000038372	218138	Gmds	protein_coding	GDP-mannose 4, 6-dehydratase [Source:MGI Symbol;Acc:MGI:1891112]	-2.25138	-1.17081	-1.43745	-0.904168	1.04251e-10	6.08293e-10
ENSMUSG00000090894	258325	Olfr110	protein_coding	olfactory receptor 110 [Source:MGI Symbol;Acc:MGI:2177493]	-7.79012	-2.96164	-3.63584	-2.28746	1.03077e-10	6.01919e-10
ENSMUSG00000031016	22390	Wee1	protein_coding	WEE 1 homolog 1 (S. pombe) [Source:MGI Symbol;Acc:MGI:103075]	-2.41129	-1.26981	-1.5581	-0.981512	9.63537e-11	5.65766e-10
ENSMUSG00000026193	14268	Fn1	protein_coding	fibronectin 1 [Source:MGI Symbol;Acc:MGI:95566]	-2.56166	-1.35708	-1.66407	-1.05008	8.7852e-11	5.1871e-10
ENSMUSG00000026566	68481	Mpzl1	protein_coding	myelin protein zero-like 1 [Source:MGI Symbol;Acc:MGI:1915731]	-2.05885	-1.04184	-1.27731	-0.806373	8.5839e-11	5.07908e-10
ENSMUSG00000040950	216864	Mgl2	protein_coding	macrophage galactose N-acetyl-galactosamine specific lectin 2 [Source:MGI Symbol;Acc:MGI:2385729]	-2.94998	-1.56071	-1.91084	-1.21057	7.09996e-11	4.25198e-10
ENSMUSG00000021811	108671	Dnajc9	protein_coding	DnaJ heat shock protein family (Hsp40) member C9 [Source:MGI Symbol;Acc:MGI:1915326]	-2.0036	-1.00259	-1.22742	-0.777766	7.0214e-11	4.20675e-10
ENSMUSG00000031907	22751	Zfp90	protein_coding	zinc finger protein 90 [Source:MGI Symbol;Acc:MGI:104786]	-2.04916	-1.03503	-1.26487	-0.80519	5.45773e-11	3.30568e-10
ENSMUSG00000031906	58994	Smpd3	protein_coding	sphingomyelin phosphodiesterase 3, neutral [Source:MGI Symbol;Acc:MGI:1927578]	-10.0817	-3.33366	-4.07126	-2.59607	4.96877e-11	3.01881e-10
ENSMUSG00000063021	319169	Hist1h2ak	protein_coding	histone cluster 1, H2ak [Source:MGI Symbol;Acc:MGI:2448297]	-2.0215	-1.01542	-1.23975	-0.791098	4.77545e-11	2.90903e-10
ENSMUSG00000020099	107449	Unc5b	protein_coding	unc-5 netrin receptor B [Source:MGI Symbol;Acc:MGI:894703]	-2.77808	-1.47409	-1.79847	-1.14971	4.31277e-11	2.64348e-10
ENSMUSG00000020042	74007	Btbd11	protein_coding	BTB (POZ) domain containing 11 [Source:MGI Symbol;Acc:MGI:1921257]	-4.95389	-2.30856	-2.81642	-1.80071	4.28044e-11	2.62716e-10
ENSMUSG00000004113	12287	Cacna1b	protein_coding	calcium channel, voltage-dependent, N type, alpha 1B subunit [Source:MGI Symbol;Acc:MGI:88296]	-2.66406	-1.41363	-1.72452	-1.10274	4.24853e-11	2.60873e-10
ENSMUSG00000054263	16880	Lifr	protein_coding	LIF receptor alpha [Source:MGI Symbol;Acc:MGI:96788]	-2.1876	-1.12935	-1.37676	-0.881945	3.839e-11	2.37732e-10
ENSMUSG00000049985	77318	Ankrd55	protein_coding	ankyrin repeat domain 55 [Source:MGI Symbol;Acc:MGI:1924568]	-3.63219	-1.86084	-2.26729	-1.45438	3.55621e-11	2.21112e-10
ENSMUSG00000037544	218977	Dlgap5	protein_coding	DLG associated protein 5 [Source:MGI Symbol;Acc:MGI:2183453]	-2.25163	-1.17097	-1.42569	-0.916252	3.19424e-11	1.99774e-10
ENSMUSG00000039713	269608	Plekhg5	protein_coding	pleckstrin homology domain containing, family G (with RhoGef domain) member 5 [Source:MGI Symbol;Acc:MGI:2652860]	-5.10985	-2.35328	-2.86412	-1.84244	3.02447e-11	1.89843e-10
ENSMUSG00000037474	76843	Dtl	protein_coding	denticleless E3 ubiquitin protein ligase [Source:MGI Symbol;Acc:MGI:1924093]	-3.45327	-1.78796	-2.17504	-1.40089	2.81738e-11	1.77731e-10
ENSMUSG00000033610	75735	Pank1	protein_coding	pantothenate kinase 1 [Source:MGI Symbol;Acc:MGI:1922985]	-2.04891	-1.03486	-1.25754	-0.812181	2.40188e-11	1.52845e-10
ENSMUSG00000055884	104806	Fancm	protein_coding	Fanconi anemia, complementation group M [Source:MGI Symbol;Acc:MGI:2442306]	-2.08486	-1.05995	-1.28777	-0.832131	2.33172e-11	1.48517e-10
ENSMUSG00000027200	214968	Sema6d	protein_coding	sema domain, transmembrane domain (TM), and cytoplasmic domain, (semaphorin) 6D [Source:MGI Symbol;Acc:MGI:2387661]	-23.7886	-4.5722	-5.55299	-3.59141	2.21396e-11	1.41212e-10
ENSMUSG00000034751	328329	Mast4	protein_coding	microtubule associated serine/threonine kinase family member 4 [Source:MGI Symbol;Acc:MGI:1918885]	-2.28947	-1.19502	-1.44989	-0.940149	1.90091e-11	1.22259e-10
ENSMUSG00000078772	NA	Gm12353	protein_coding	predicted gene 12353 [Source:MGI Symbol;Acc:MGI:3699710]	-2.50759	-1.3263	-1.60901	-1.04359	1.87341e-11	1.20642e-10
ENSMUSG00000001517	14235	Foxm1	protein_coding	forkhead box M1 [Source:MGI Symbol;Acc:MGI:1347487]	-2.44562	-1.2902	-1.56473	-1.01567	1.7875e-11	1.15448e-10
ENSMUSG00000024640	107272	Psat1	protein_coding	phosphoserine aminotransferase 1 [Source:MGI Symbol;Acc:MGI:2183441]	-3.83655	-1.93981	-2.35007	-1.52954	1.52286e-11	9.93309e-11
ENSMUSG00000037151	216011	Lrrc20	protein_coding	leucine rich repeat containing 20 [Source:MGI Symbol;Acc:MGI:2387182]	-2.08884	-1.0627	-1.28732	-0.838086	1.49753e-11	9.78167e-11
ENSMUSG00000073434	106618	Wdr90	protein_coding	WD repeat domain 90 [Source:MGI Symbol;Acc:MGI:1921267]	-2.08142	-1.05757	-1.27939	-0.835745	1.22059e-11	8.05646e-11
ENSMUSG00000047409	69274	Ctdspl	protein_coding	CTD (carboxy-terminal domain, RNA polymerase II, polypeptide A) small phosphatase-like [Source:MGI Symbol;Acc:MGI:1916524]	-2.22431	-1.15336	-1.39461	-0.91211	1.13422e-11	7.53312e-11
ENSMUSG00000007379	329727	Dennd2c	protein_coding	DENN/MADD domain containing 2C [Source:MGI Symbol;Acc:MGI:3036254]	-2.3698	-1.24476	-1.50496	-0.98457	1.11407e-11	7.41352e-11
ENSMUSG00000042489	269582	Clspn	protein_coding	claspin [Source:MGI Symbol;Acc:MGI:2445153]	-2.68944	-1.4273	-1.72457	-1.13004	1.01059e-11	6.76728e-11
ENSMUSG00000050410	106795	Tcf19	protein_coding	transcription factor 19 [Source:MGI Symbol;Acc:MGI:103180]	-2.84822	-1.51006	-1.82299	-1.19713	8.83807e-12	5.95869e-11
ENSMUSG00000000253	66355	Gmpr	protein_coding	guanosine monophosphate reductase [Source:MGI Symbol;Acc:MGI:1913605]	-2.64175	-1.40149	-1.69186	-1.11112	8.78683e-12	5.92993e-11
ENSMUSG00000020547	66912	Bzw2	protein_coding	basic leucine zipper and W2 domains 2 [Source:MGI Symbol;Acc:MGI:1914162]	-2.55324	-1.35233	-1.63121	-1.07345	7.75239e-12	5.26006e-11
ENSMUSG00000095332	NA	Gm9821	protein_coding	predicted gene 9821 [Source:MGI Symbol;Acc:MGI:3704208]	-2.04736	-1.03376	-1.24551	-0.822012	6.46168e-12	4.42776e-11
ENSMUSG00000060568	226610	Fam78b	protein_coding	family with sequence similarity 78, member B [Source:MGI Symbol;Acc:MGI:2443050]	-11.2836	-3.49616	-4.20103	-2.79128	4.20375e-12	2.95975e-11
ENSMUSG00000031137	14168	Fgf13	protein_coding	fibroblast growth factor 13 [Source:MGI Symbol;Acc:MGI:109178]	-44.8068	-5.48565	-6.59084	-4.38046	4.12225e-12	2.90533e-11
ENSMUSG00000046768	80837	Rhoj	protein_coding	ras homolog family member J [Source:MGI Symbol;Acc:MGI:1931551]	-4.02236	-2.00804	-2.41164	-1.60444	3.86441e-12	2.73733e-11
ENSMUSG00000020653	194655	Klf11	protein_coding	Kruppel-like factor 11 [Source:MGI Symbol;Acc:MGI:2653368]	-2.21572	-1.14778	-1.37784	-0.917713	3.58646e-12	2.55243e-11
ENSMUSG00000035455	60530	Fignl1	protein_coding	fidgetin-like 1 [Source:MGI Symbol;Acc:MGI:1890648]	-3.31125	-1.72738	-2.07334	-1.38141	3.50887e-12	2.50235e-11
ENSMUSG00000069310	319148	Hist1h3c	protein_coding	histone cluster 1, H3c [Source:MGI Symbol;Acc:MGI:2448320]	-3.74451	-1.90478	-2.28623	-1.52332	3.4993e-12	2.49682e-11
ENSMUSG00000029299	27405	Abcg3	protein_coding	ATP binding cassette subfamily G member 3 [Source:MGI Symbol;Acc:MGI:1351624]	-3.62249	-1.85698	-2.22743	-1.48653	3.14766e-12	2.25874e-11
ENSMUSG00000022177	219072	Haus4	protein_coding	HAUS augmin-like complex, subunit 4 [Source:MGI Symbol;Acc:MGI:1261794]	-2.05733	-1.04077	-1.24728	-0.834269	2.71358e-12	1.96767e-11
ENSMUSG00000038331	212712	Satb2	protein_coding	special AT-rich sequence binding protein 2 [Source:MGI Symbol;Acc:MGI:2679336]	-2.84901	-1.51046	-1.80883	-1.21209	2.4024e-12	1.75028e-11
ENSMUSG00000044708	16513	Kcnj10	protein_coding	potassium inwardly-rectifying channel, subfamily J, member 10 [Source:MGI Symbol;Acc:MGI:1194504]	-2.60522	-1.38141	-1.65425	-1.10856	2.39524e-12	1.74691e-11
ENSMUSG00000028716	67182	Pdzk1ip1	protein_coding	PDZK1 interacting protein 1 [Source:MGI Symbol;Acc:MGI:1914432]	-2.84455	-1.5082	-1.80364	-1.21276	1.90699e-12	1.4079e-11
ENSMUSG00000074141	100328588	Il4i1	protein_coding	interleukin 4 induced 1 [Source:MGI Symbol;Acc:MGI:109552]	-2.07861	-1.05562	-1.26144	-0.8498	1.67567e-12	1.24509e-11
ENSMUSG00000095217	319187	Hist1h2bn	protein_coding	histone cluster 1, H2bn [Source:MGI Symbol;Acc:MGI:2448407]	-3.06821	-1.6174	-1.93227	-1.30252	1.60702e-12	1.1973e-11
ENSMUSG00000023015	26934	Racgap1	protein_coding	Rac GTPase-activating protein 1 [Source:MGI Symbol;Acc:MGI:1349423]	-2.1214	-1.08502	-1.29601	-0.874021	1.55743e-12	1.1616e-11
ENSMUSG00000074743	21824	Thbd	protein_coding	thrombomodulin [Source:MGI Symbol;Acc:MGI:98736]	-2.32734	-1.21868	-1.45488	-0.982486	1.41931e-12	1.06145e-11
ENSMUSG00000026832	227929	Cytip	protein_coding	cytohesin 1 interacting protein [Source:MGI Symbol;Acc:MGI:2183535]	-2.09968	-1.07017	-1.276	-0.864345	1.14632e-12	8.66666e-12
ENSMUSG00000020185	52679	E2f7	protein_coding	E2F transcription factor 7 [Source:MGI Symbol;Acc:MGI:1289147]	-7.6609	-2.93751	-3.50241	-2.37262	1.14201e-12	8.63881e-12
ENSMUSG00000029516	12704	Cit	protein_coding	citron [Source:MGI Symbol;Acc:MGI:105313]	-2.8851	-1.52862	-1.82192	-1.23532	1.07244e-12	8.14819e-12
ENSMUSG00000045045	225875	Lrfn4	protein_coding	leucine rich repeat and fibronectin type III domain containing 4 [Source:MGI Symbol;Acc:MGI:2385612]	-2.81361	-1.49242	-1.77873	-1.20611	1.06786e-12	8.12235e-12
ENSMUSG00000031971	73420	Ccsap	protein_coding	centriole, cilia and spindle associated protein [Source:MGI Symbol;Acc:MGI:1920670]	-2.86963	-1.52087	-1.81197	-1.22976	1.0022e-12	7.64817e-12
ENSMUSG00000030313	320560	Dennd5b	protein_coding	DENN/MADD domain containing 5B [Source:MGI Symbol;Acc:MGI:2444273]	-8.79524	-3.13672	-3.7326	-2.54085	8.11163e-13	6.25586e-12
ENSMUSG00000024590	16906	Lmnb1	protein_coding	lamin B1 [Source:MGI Symbol;Acc:MGI:96795]	-2.2374	-1.16182	-1.38146	-0.942184	7.07568e-13	5.49677e-12
ENSMUSG00000037661	71862	Gpr160	protein_coding	G protein-coupled receptor 160 [Source:MGI Symbol;Acc:MGI:1919112]	-2.20089	-1.13809	-1.3531	-0.923081	6.94606e-13	5.40518e-12
ENSMUSG00000028328	21916	Tmod1	protein_coding	tropomodulin 1 [Source:MGI Symbol;Acc:MGI:98775]	-2.47126	-1.30525	-1.55127	-1.05922	6.51471e-13	5.09245e-12
ENSMUSG00000061991	319173	Hist1h2af	protein_coding	histone cluster 1, H2af [Source:MGI Symbol;Acc:MGI:2448309]	-4.46417	-2.15839	-2.56306	-1.75372	5.60323e-13	4.40987e-12
ENSMUSG00000049086	107771	Bmyc	protein_coding	brain expressed myelocytomatosis oncogene [Source:MGI Symbol;Acc:MGI:88184]	-7.99084	-2.99835	-3.55912	-2.43757	5.22935e-13	4.14155e-12
ENSMUSG00000070576	433938	Mn1	protein_coding	meningioma 1 [Source:MGI Symbol;Acc:MGI:1261813]	-7.70351	-2.94552	-3.4963	-2.39473	5.20101e-13	4.12147e-12
ENSMUSG00000090675	545205	Olfr111	protein_coding	olfactory receptor 111 [Source:MGI Symbol;Acc:MGI:2177494]	-5.52176	-2.46513	-2.92595	-2.00431	5.15813e-13	4.09453e-12
ENSMUSG00000045903	225872	Npas4	protein_coding	neuronal PAS domain protein 4 [Source:MGI Symbol;Acc:MGI:2664186]	-82.5349	-6.36693	-7.5519	-5.18197	4.55173e-13	3.63193e-12
ENSMUSG00000014158	63873	Trpv4	protein_coding	transient receptor potential cation channel, subfamily V, member 4 [Source:MGI Symbol;Acc:MGI:1926945]	-2.15713	-1.10911	-1.31549	-0.902728	4.52885e-13	3.61785e-12
ENSMUSG00000036617	208618	Etl4	protein_coding	enhancer trap locus 4 [Source:MGI Symbol;Acc:MGI:95454]	-2.79368	-1.48217	-1.75663	-1.2077	3.94663e-13	3.17475e-12
ENSMUSG00000057337	53374	Chst3	protein_coding	carbohydrate sulfotransferase 3 [Source:MGI Symbol;Acc:MGI:1858224]	-4.58359	-2.19648	-2.59879	-1.79417	2.88999e-13	2.35769e-12
ENSMUSG00000063873	94249	Slc24a3	protein_coding	solute carrier family 24 (sodium/potassium/calcium exchanger), member 3 [Source:MGI Symbol;Acc:MGI:2137513]	-10.5393	-3.39771	-4.01038	-2.78505	1.84612e-13	1.54529e-12
ENSMUSG00000026458	68507	Ppfia4	protein_coding	protein tyrosine phosphatase, receptor type, f polypeptide (PTPRF), interacting protein (liprin), alpha 4 [Source:MGI Symbol;Acc:MGI:1915757]	-2.17404	-1.12038	-1.3221	-0.918652	1.76949e-13	1.48564e-12
ENSMUSG00000033730	13655	Egr3	protein_coding	early growth response 3 [Source:MGI Symbol;Acc:MGI:1306780]	-4.29759	-2.10353	-2.48044	-1.72662	1.53879e-13	1.30223e-12
ENSMUSG00000039953	65945	Clstn1	protein_coding	calsyntenin 1 [Source:MGI Symbol;Acc:MGI:1929895]	-2.59885	-1.37788	-1.62462	-1.13113	1.51433e-13	1.28232e-12
ENSMUSG00000091119	100039139	Ccdc152	protein_coding	coiled-coil domain containing 152 [Source:MGI Symbol;Acc:MGI:3641617]	-3.56676	-1.83461	-2.16119	-1.50804	1.27371e-13	1.0899e-12
ENSMUSG00000027318	110751	Adam33	protein_coding	a disintegrin and metallopeptidase domain 33 [Source:MGI Symbol;Acc:MGI:1341813]	-2.32782	-1.21898	-1.43517	-1.00279	1.14543e-13	9.86241e-13
ENSMUSG00000025582	18164	Nptx1	protein_coding	neuronal pentraxin 1 [Source:MGI Symbol;Acc:MGI:107811]	-35.8892	-5.16548	-6.08119	-4.24977	1.13051e-13	9.74608e-13
ENSMUSG00000018800	217265	Abca5	protein_coding	ATP-binding cassette, sub-family A (ABC1), member 5 [Source:MGI Symbol;Acc:MGI:2386607]	-2.48617	-1.31393	-1.54618	-1.08167	1.03961e-13	9.00738e-13
ENSMUSG00000022469	223864	Rapgef3	protein_coding	Rap guanine nucleotide exchange factor (GEF) 3 [Source:MGI Symbol;Acc:MGI:2441741]	-2.83802	-1.50489	-1.77003	-1.23975	9.45652e-14	8.23974e-13
ENSMUSG00000019944	69288	Rhobtb1	protein_coding	Rho-related BTB domain containing 1 [Source:MGI Symbol;Acc:MGI:1916538]	-2.37013	-1.24497	-1.46401	-1.02593	9.0754e-14	7.92765e-13
ENSMUSG00000069255	105352	Dusp22	protein_coding	dual specificity phosphatase 22 [Source:MGI Symbol;Acc:MGI:1915926]	-2.27617	-1.18661	-1.39509	-0.978129	8.71913e-14	7.65512e-13
ENSMUSG00000045287	237847	Rtn4rl1	protein_coding	reticulon 4 receptor-like 1 [Source:MGI Symbol;Acc:MGI:2661375]	-15.9637	-3.99672	-4.69606	-3.29738	7.74272e-14	6.82821e-13
ENSMUSG00000022303	75766	Dcstamp	protein_coding	dendrocyte expressed seven transmembrane protein [Source:MGI Symbol;Acc:MGI:1923016]	-15.6959	-3.97232	-4.66317	-3.28146	6.48613e-14	5.77157e-13
ENSMUSG00000026688	66447	Mgst3	protein_coding	microsomal glutathione S-transferase 3 [Source:MGI Symbol;Acc:MGI:1913697]	-2.26563	-1.17991	-1.38409	-0.97574	5.59632e-14	5.02179e-13
ENSMUSG00000029730	17220	Mcm7	protein_coding	minichromosome maintenance complex component 7 [Source:MGI Symbol;Acc:MGI:1298398]	-2.05698	-1.04053	-1.22003	-0.861028	5.11501e-14	4.61084e-13
ENSMUSG00000007080	18973	Pole	protein_coding	polymerase (DNA directed), epsilon [Source:MGI Symbol;Acc:MGI:1196391]	-3.8198	-1.9335	-2.26696	-1.60004	5.07646e-14	4.57908e-13
ENSMUSG00000066191	75691	Anks6	protein_coding	ankyrin repeat and sterile alpha motif domain containing 6 [Source:MGI Symbol;Acc:MGI:1922941]	-2.24669	-1.1678	-1.36891	-0.966695	4.85993e-14	4.39524e-13
ENSMUSG00000039716	208869	Dock3	protein_coding	dedicator of cyto-kinesis 3 [Source:MGI Symbol;Acc:MGI:2429763]	-2.98152	-1.57605	-1.84714	-1.30496	4.69513e-14	4.25175e-13
ENSMUSG00000030852	57752	Tacc2	protein_coding	transforming, acidic coiled-coil containing protein 2 [Source:MGI Symbol;Acc:MGI:1928899]	-3.56307	-1.83312	-2.14654	-1.5197	3.93645e-14	3.60724e-13
ENSMUSG00000021720	71816	Rnf180	protein_coding	ring finger protein 180 [Source:MGI Symbol;Acc:MGI:1919066]	-2.17545	-1.12131	-1.31201	-0.930613	3.3665e-14	3.09934e-13
ENSMUSG00000040133	381413	Gpr176	protein_coding	G protein-coupled receptor 176 [Source:MGI Symbol;Acc:MGI:2685858]	-3.24194	-1.69686	-1.98467	-1.40904	3.11376e-14	2.87239e-13
ENSMUSG00000032528	22354	Vipr1	protein_coding	vasoactive intestinal peptide receptor 1 [Source:MGI Symbol;Acc:MGI:109272]	-3.53212	-1.82054	-2.12754	-1.51353	2.62363e-14	2.4365e-13
ENSMUSG00000027199	67092	Gatm	protein_coding	glycine amidinotransferase (L-arginine:glycine amidinotransferase) [Source:MGI Symbol;Acc:MGI:1914342]	-2.98037	-1.57549	-1.84059	-1.3104	2.45667e-14	2.29068e-13
ENSMUSG00000035283	11554	Adrb1	protein_coding	adrenergic receptor, beta 1 [Source:MGI Symbol;Acc:MGI:87937]	-24.7736	-4.63073	-5.40696	-3.8545	2.19673e-14	2.06081e-13
ENSMUSG00000047139	12484	Cd24a	protein_coding	CD24a antigen [Source:MGI Symbol;Acc:MGI:88323]	-3.4504	-1.78676	-2.08477	-1.48876	1.89293e-14	1.78794e-13
ENSMUSG00000003484	72054	Cyp4f18	protein_coding	cytochrome P450, family 4, subfamily f, polypeptide 18 [Source:MGI Symbol;Acc:MGI:1919304]	-2.89908	-1.53559	-1.79061	-1.28058	1.66528e-14	1.58374e-13
ENSMUSG00000096606	100503386	Tpbgl	protein_coding	trophoblast glycoprotein-like [Source:MGI Symbol;Acc:MGI:3646425]	-10.3106	-3.36606	-3.9189	-2.81322	1.19766e-14	1.15894e-13
ENSMUSG00000036875	327762	Dna2	protein_coding	DNA replication helicase/nuclease 2 [Source:MGI Symbol;Acc:MGI:2443732]	-2.07602	-1.05382	-1.22679	-0.880847	1.17567e-14	1.13925e-13
ENSMUSG00000030134	70727	Rasgef1a	protein_coding	RasGEF domain family, member 1A [Source:MGI Symbol;Acc:MGI:1917977]	-2.69358	-1.42952	-1.66345	-1.1956	1.07316e-14	1.04578e-13
ENSMUSG00000006678	18968	Pola1	protein_coding	polymerase (DNA directed), alpha 1 [Source:MGI Symbol;Acc:MGI:99660]	-2.30478	-1.20463	-1.40141	-1.00784	1.01971e-14	9.95103e-14
ENSMUSG00000032194	235041	Kank2	protein_coding	KN motif and ankyrin repeat domains 2 [Source:MGI Symbol;Acc:MGI:2384568]	-2.00145	-1.00105	-1.16428	-0.837812	9.66228e-15	9.46917e-14
ENSMUSG00000036086	226409	Zranb3	protein_coding	zinc finger, RAN-binding domain containing 3 [Source:MGI Symbol;Acc:MGI:1918362]	-2.07098	-1.05032	-1.22102	-0.879609	8.75893e-15	8.60828e-14
ENSMUSG00000028031	56811	Dkk2	protein_coding	dickkopf WNT signaling pathway inhibitor 2 [Source:MGI Symbol;Acc:MGI:1890663]	-16.4647	-4.0413	-4.69448	-3.38812	7.40945e-15	7.34992e-14
ENSMUSG00000028229	66302	Rmdn1	protein_coding	regulator of microtubule dynamics 1 [Source:MGI Symbol;Acc:MGI:1913552]	-2.48192	-1.31146	-1.52133	-1.10158	5.50136e-15	5.54062e-14
ENSMUSG00000020435	74309	Osbp2	protein_coding	oxysterol binding protein 2 [Source:MGI Symbol;Acc:MGI:1921559]	-2.98049	-1.57555	-1.82602	-1.32508	4.50169e-15	4.5738e-14
ENSMUSG00000020598	319504	Nrcam	protein_coding	neuronal cell adhesion molecule [Source:MGI Symbol;Acc:MGI:104750]	-5.58864	-2.4825	-2.87597	-2.08903	4.11238e-15	4.19986e-14
ENSMUSG00000035459	192188	Stab2	protein_coding	stabilin 2 [Source:MGI Symbol;Acc:MGI:2178743]	-5.53192	-2.46778	-2.85527	-2.0803	3.09572e-15	3.20416e-14
ENSMUSG00000034353	51801	Ramp1	protein_coding	receptor (calcitonin) activity modifying protein 1 [Source:MGI Symbol;Acc:MGI:1858418]	-5.69871	-2.51063	-2.90269	-2.11858	2.62114e-15	2.73136e-14
ENSMUSG00000072437	332397	Nanos1	protein_coding	nanos C2HC-type zinc finger 1 [Source:MGI Symbol;Acc:MGI:2669254]	-4.48253	-2.16432	-2.49835	-1.83028	1.83446e-15	1.94234e-14
ENSMUSG00000034959	271221	Rubcnl	protein_coding	RUN and cysteine rich domain containing beclin 1 interacting protein like [Source:MGI Symbol;Acc:MGI:2685590]	-2.14453	-1.10066	-1.26991	-0.931413	1.6386e-15	1.74835e-14
ENSMUSG00000089774	53881	Slc5a3	protein_coding	solute carrier family 5 (inositol transporters), member 3 [Source:MGI Symbol;Acc:MGI:1858226]	-2.3165	-1.21195	-1.39781	-1.02608	1.5099e-15	1.62229e-14
ENSMUSG00000040229	23890	Gpr34	protein_coding	G protein-coupled receptor 34 [Source:MGI Symbol;Acc:MGI:1346334]	-14.6774	-3.87553	-4.46756	-3.28349	1.34015e-15	1.45232e-14
ENSMUSG00000039774	230145	Galnt12	protein_coding	polypeptide N-acetylgalactosaminyltransferase 12 [Source:MGI Symbol;Acc:MGI:2444664]	-2.71133	-1.439	-1.65781	-1.2202	1.16225e-15	1.26948e-14
ENSMUSG00000042842	20708	Serpinb6b	protein_coding	serine (or cysteine) peptidase inhibitor, clade B, member 6b [Source:MGI Symbol;Acc:MGI:894688]	-2.8813	-1.52672	-1.75857	-1.29487	1.11807e-15	1.22509e-14
ENSMUSG00000000318	17312	Clec10a	protein_coding	C-type lectin domain family 10, member A [Source:MGI Symbol;Acc:MGI:96975]	-3.01761	-1.59341	-1.83405	-1.35277	9.43323e-16	1.04271e-14
ENSMUSG00000015202	215748	Cnksr3	protein_coding	Cnksr family member 3 [Source:MGI Symbol;Acc:MGI:2674130]	-2.01878	-1.01348	-1.16638	-0.860587	9.12901e-16	1.0107e-14
ENSMUSG00000023034	15370	Nr4a1	protein_coding	nuclear receptor subfamily 4, group A, member 1 [Source:MGI Symbol;Acc:MGI:1352454]	-2.32471	-1.21705	-1.40054	-1.03357	8.94149e-16	9.9286e-15
ENSMUSG00000004698	79221	Hdac9	protein_coding	histone deacetylase 9 [Source:MGI Symbol;Acc:MGI:1931221]	-3.11517	-1.63931	-1.88517	-1.39345	7.61593e-16	8.55509e-15
ENSMUSG00000016756	12763	Cmah	protein_coding	cytidine monophospho-N-acetylneuraminic acid hydroxylase [Source:MGI Symbol;Acc:MGI:103227]	-11.6831	-3.54636	-4.07438	-3.01834	6.08704e-16	6.9277e-15
ENSMUSG00000024140	13819	Epas1	protein_coding	endothelial PAS domain protein 1 [Source:MGI Symbol;Acc:MGI:109169]	-2.20888	-1.14332	-1.31265	-0.973986	5.16899e-16	5.93661e-15
ENSMUSG00000045136	73710	Tubb2b	protein_coding	tubulin, beta 2B class IIB [Source:MGI Symbol;Acc:MGI:1920960]	-2.71714	-1.44209	-1.65545	-1.22873	5.00796e-16	5.77084e-15
ENSMUSG00000021226	171210	Acot2	protein_coding	acyl-CoA thioesterase 2 [Source:MGI Symbol;Acc:MGI:2159605]	-2.56876	-1.36107	-1.56226	-1.15988	4.86983e-16	5.62573e-15
ENSMUSG00000031398	18846	Plxna3	protein_coding	plexin A3 [Source:MGI Symbol;Acc:MGI:107683]	-4.17021	-2.06012	-2.36439	-1.75584	4.74697e-16	5.50219e-15
ENSMUSG00000029438	77045	Bcl7a	protein_coding	B cell CLL/lymphoma 7A [Source:MGI Symbol;Acc:MGI:1924295]	-2.9365	-1.5541	-1.78297	-1.32523	4.33909e-16	5.06337e-15
ENSMUSG00000069267	319150	Hist1h3b	protein_coding	histone cluster 1, H3b [Source:MGI Symbol;Acc:MGI:2448319]	-3.99958	-1.99985	-2.29435	-1.70534	4.33418e-16	5.06191e-15
ENSMUSG00000023909	76498	Paqr4	protein_coding	progestin and adipoQ receptor family member IV [Source:MGI Symbol;Acc:MGI:1923748]	-3.82006	-1.9336	-2.21741	-1.64979	3.91089e-16	4.59471e-15
ENSMUSG00000070858	381633	Gm1673	protein_coding	predicted gene 1673 [Source:MGI Symbol;Acc:MGI:2686519]	-4.04198	-2.01506	-2.30991	-1.72021	3.55194e-16	4.1908e-15
ENSMUSG00000025402	17937	Nab2	protein_coding	Ngfi-A binding protein 2 [Source:MGI Symbol;Acc:MGI:107563]	-2.03729	-1.02665	-1.17686	-0.876439	3.54402e-16	4.18503e-15
ENSMUSG00000055612	66953	Cdca7	protein_coding	cell division cycle associated 7 [Source:MGI Symbol;Acc:MGI:1914203]	-7.05277	-2.81819	-3.22979	-2.40659	3.35289e-16	3.97244e-15
ENSMUSG00000063810	236266	Alms1	protein_coding	ALMS1, centrosome and basal body associated [Source:MGI Symbol;Acc:MGI:1934606]	-3.15861	-1.65929	-1.90129	-1.41729	3.20811e-16	3.82099e-15
ENSMUSG00000049539	80838	Hist1h1a	protein_coding	histone cluster 1, H1a [Source:MGI Symbol;Acc:MGI:1931523]	-3.71786	-1.89447	-2.16984	-1.6191	2.89006e-16	3.46907e-15
ENSMUSG00000032470	17532	Mras	protein_coding	muscle and microspikes RAS [Source:MGI Symbol;Acc:MGI:1100856]	-4.86583	-2.28268	-2.61062	-1.95475	2.00588e-16	2.46993e-15
ENSMUSG00000027956	70652	Tmem144	protein_coding	transmembrane protein 144 [Source:MGI Symbol;Acc:MGI:1917902]	-3.04169	-1.60487	-1.83473	-1.37502	1.82301e-16	2.25278e-15
ENSMUSG00000056394	16881	Lig1	protein_coding	ligase I, DNA, ATP-dependent [Source:MGI Symbol;Acc:MGI:101789]	-2.19539	-1.13448	-1.29615	-0.972802	1.56018e-16	1.94889e-15
ENSMUSG00000058773	56702	Hist1h1b	protein_coding	histone cluster 1, H1b [Source:MGI Symbol;Acc:MGI:1861461]	-4.32652	-2.11321	-2.41431	-1.8121	1.55158e-16	1.9399e-15
ENSMUSG00000021356	16364	Irf4	protein_coding	interferon regulatory factor 4 [Source:MGI Symbol;Acc:MGI:1096873]	-6.36723	-2.67067	-3.0487	-2.29263	1.26256e-16	1.59731e-15
ENSMUSG00000011256	11492	Adam19	protein_coding	a disintegrin and metallopeptidase domain 19 (meltrin beta) [Source:MGI Symbol;Acc:MGI:105377]	-4.18151	-2.06402	-2.35575	-1.77229	1.20467e-16	1.52828e-15
ENSMUSG00000051212	321019	Gpr183	protein_coding	G protein-coupled receptor 183 [Source:MGI Symbol;Acc:MGI:2442034]	-4.85157	-2.27845	-2.60032	-1.95658	1.18523e-16	1.50638e-15
ENSMUSG00000020649	20135	Rrm2	protein_coding	ribonucleotide reductase M2 [Source:MGI Symbol;Acc:MGI:98181]	-4.09861	-2.03514	-2.3214	-1.74887	1.03573e-16	1.32734e-15
ENSMUSG00000032750	100503280	Gab3	protein_coding	growth factor receptor bound protein 2-associated protein 3 [Source:MGI Symbol;Acc:MGI:2387324]	-2.16537	-1.11461	-1.27076	-0.958467	9.11321e-17	1.18215e-15
ENSMUSG00000026077	18143	Npas2	protein_coding	neuronal PAS domain protein 2 [Source:MGI Symbol;Acc:MGI:109232]	-3.98192	-1.99346	-2.27142	-1.7155	7.8641e-17	1.0288e-15
ENSMUSG00000074361	319430	C5ar2	protein_coding	complement component 5a receptor 2 [Source:MGI Symbol;Acc:MGI:2442013]	-2.46413	-1.30108	-1.48242	-1.11973	7.76274e-17	1.01844e-15
ENSMUSG00000020961	108800	Ston2	protein_coding	stonin 2 [Source:MGI Symbol;Acc:MGI:1918272]	-4.63633	-2.21298	-2.52077	-1.9052	7.25875e-17	9.55943e-16
ENSMUSG00000042724	338372	Map3k9	protein_coding	mitogen-activated protein kinase kinase kinase 9 [Source:MGI Symbol;Acc:MGI:2449952]	-2.43803	-1.28571	-1.46446	-1.10697	7.16885e-17	9.45905e-16
ENSMUSG00000061143	433586	Maml3	protein_coding	mastermind like transcriptional coactivator 3 [Source:MGI Symbol;Acc:MGI:2389461]	-3.69256	-1.88462	-2.14572	-1.62353	6.41742e-17	8.5327e-16
ENSMUSG00000052565	14957	Hist1h1d	protein_coding	histone cluster 1, H1d [Source:MGI Symbol;Acc:MGI:107502]	-2.46932	-1.30411	-1.48344	-1.12478	5.07075e-17	6.89462e-16
ENSMUSG00000046841	216197	Ckap4	protein_coding	cytoskeleton-associated protein 4 [Source:MGI Symbol;Acc:MGI:2444926]	-2.19411	-1.13364	-1.28901	-0.978263	4.56735e-17	6.24702e-16
ENSMUSG00000051339	243219	2900026A02Rik	protein_coding	RIKEN cDNA 2900026A02 gene [Source:MGI Symbol;Acc:MGI:1920194]	-2.44466	-1.28964	-1.46633	-1.11294	4.52077e-17	6.19556e-16
ENSMUSG00000003420	14132	Fcgrt	protein_coding	Fc receptor, IgG, alpha chain transporter [Source:MGI Symbol;Acc:MGI:103017]	-2.12468	-1.08725	-1.2359	-0.938597	4.22613e-17	5.80903e-16
ENSMUSG00000036390	13197	Gadd45a	protein_coding	growth arrest and DNA-damage-inducible 45 alpha [Source:MGI Symbol;Acc:MGI:107799]	-2.25183	-1.17109	-1.33108	-1.01111	4.12192e-17	5.67144e-16
ENSMUSG00000030117	14562	Gdf3	protein_coding	growth differentiation factor 3 [Source:MGI Symbol;Acc:MGI:95686]	-2.10241	-1.07204	-1.21813	-0.925955	3.80512e-17	5.25121e-16
ENSMUSG00000071324	213402	Armc2	protein_coding	armadillo repeat containing 2 [Source:MGI Symbol;Acc:MGI:1916449]	-8.2309	-3.04105	-3.45025	-2.63185	2.5471e-17	3.59035e-16
ENSMUSG00000024534	67847	Sncaip	protein_coding	synuclein, alpha interacting protein (synphilin) [Source:MGI Symbol;Acc:MGI:1915097]	-9.8413	-3.29885	-3.73756	-2.86014	1.7529e-17	2.50405e-16
ENSMUSG00000039652	208922	Cpeb3	protein_coding	cytoplasmic polyadenylation element binding protein 3 [Source:MGI Symbol;Acc:MGI:2443075]	-2.3199	-1.21406	-1.37447	-1.05365	1.42425e-17	2.07092e-16
ENSMUSG00000064363	17719	mt-Nd4	protein_coding	mitochondrially encoded NADH dehydrogenase 4 [Source:MGI Symbol;Acc:MGI:102498]	-2.00587	-1.00423	-1.1369	-0.871555	1.41912e-17	2.06781e-16
ENSMUSG00000019876	18768	Pkib	protein_coding	protein kinase inhibitor beta, cAMP dependent, testis specific [Source:MGI Symbol;Acc:MGI:101937]	-2.83203	-1.50184	-1.69913	-1.30454	1.18495e-17	1.73759e-16
ENSMUSG00000015854	11801	Cd5l	protein_coding	CD5 antigen-like [Source:MGI Symbol;Acc:MGI:1334419]	-4.11291	-2.04016	-2.30476	-1.77556	7.85116e-18	1.16737e-16
ENSMUSG00000004933	17179	Matk	protein_coding	megakaryocyte-associated tyrosine kinase [Source:MGI Symbol;Acc:MGI:99259]	-2.91677	-1.54437	-1.74337	-1.34537	6.37154e-18	9.55594e-17
ENSMUSG00000027624	13821	Epb41l1	protein_coding	erythrocyte membrane protein band 4.1 like 1 [Source:MGI Symbol;Acc:MGI:103010]	-2.03932	-1.02809	-1.16023	-0.895951	5.87334e-18	8.83748e-17
ENSMUSG00000002289	57875	Angptl4	protein_coding	angiopoietin-like 4 [Source:MGI Symbol;Acc:MGI:1888999]	-56.6262	-5.8234	-6.57082	-5.07597	5.61276e-18	8.46382e-17
ENSMUSG00000020102	20503	Slc16a7	protein_coding	solute carrier family 16 (monocarboxylic acid transporters), member 7 [Source:MGI Symbol;Acc:MGI:1330284]	-2.0392	-1.028	-1.15885	-0.897149	4.29478e-18	6.58406e-17
ENSMUSG00000067714	381810	Lpar5	protein_coding	lysophosphatidic acid receptor 5 [Source:MGI Symbol;Acc:MGI:2685918]	-2.38294	-1.25274	-1.41186	-1.09363	4.00583e-18	6.18221e-17
ENSMUSG00000030657	233781	Xylt1	protein_coding	xylosyltransferase 1 [Source:MGI Symbol;Acc:MGI:2451073]	-2.08224	-1.05813	-1.192	-0.924269	3.52415e-18	5.50022e-17
ENSMUSG00000005672	16590	Kit	protein_coding	KIT proto-oncogene receptor tyrosine kinase [Source:MGI Symbol;Acc:MGI:96677]	-10.561	-3.40067	-3.83025	-2.97109	3.35837e-18	5.25929e-17
ENSMUSG00000037664	12577	Cdkn1c	protein_coding	cyclin-dependent kinase inhibitor 1C (P57) [Source:MGI Symbol;Acc:MGI:104564]	-3.16617	-1.66274	-1.87	-1.45548	2.18079e-18	3.4782e-17
ENSMUSG00000020577	66109	Tspan13	protein_coding	tetraspanin 13 [Source:MGI Symbol;Acc:MGI:1913359]	-3.3444	-1.74175	-1.95791	-1.52559	1.8919e-18	3.04554e-17
ENSMUSG00000024421	16774	Lama3	protein_coding	laminin, alpha 3 [Source:MGI Symbol;Acc:MGI:99909]	-26.6127	-4.73404	-5.32146	-4.14662	1.88184e-18	3.03288e-17
ENSMUSG00000037568	226841	Vash2	protein_coding	vasohibin 2 [Source:MGI Symbol;Acc:MGI:2444826]	-6.48462	-2.69702	-3.03163	-2.36241	1.87323e-18	3.02252e-17
ENSMUSG00000015112	50799	Slc25a13	protein_coding	solute carrier family 25 (mitochondrial carrier, adenine nucleotide translocator), member 13 [Source:MGI Symbol;Acc:MGI:1354721]	-2.5723	-1.36306	-1.53192	-1.1942	1.78548e-18	2.89106e-17
ENSMUSG00000055782	26874	Abcd2	protein_coding	ATP-binding cassette, sub-family D (ALD), member 2 [Source:MGI Symbol;Acc:MGI:1349467]	-3.73547	-1.90129	-2.13667	-1.66591	1.7466e-18	2.83141e-17
ENSMUSG00000018819	16985	Lsp1	protein_coding	lymphocyte specific 1 [Source:MGI Symbol;Acc:MGI:96832]	-2.0473	-1.03373	-1.16108	-0.906372	1.49103e-18	2.45452e-17
ENSMUSG00000027452	68738	Acss1	protein_coding	acyl-CoA synthetase short-chain family member 1 [Source:MGI Symbol;Acc:MGI:1915988]	-2.9614	-1.56628	-1.75909	-1.37347	1.45359e-18	2.3986e-17
ENSMUSG00000076431	20677	Sox4	protein_coding	SRY (sex determining region Y)-box 4 [Source:MGI Symbol;Acc:MGI:98366]	-16.1944	-4.01742	-4.51192	-3.52293	1.44805e-18	2.39231e-17
ENSMUSG00000028832	16765	Stmn1	protein_coding	stathmin 1 [Source:MGI Symbol;Acc:MGI:96739]	-3.54243	-1.82474	-2.04869	-1.60078	1.31784e-18	2.18765e-17
ENSMUSG00000026360	19735	Rgs2	protein_coding	regulator of G-protein signaling 2 [Source:MGI Symbol;Acc:MGI:1098271]	-2.15282	-1.10623	-1.24193	-0.970525	1.29643e-18	2.15728e-17
ENSMUSG00000037370	18605	Enpp1	protein_coding	ectonucleotide pyrophosphatase/phosphodiesterase 1 [Source:MGI Symbol;Acc:MGI:97370]	-2.88348	-1.52781	-1.71521	-1.34041	1.29207e-18	2.15261e-17
ENSMUSG00000023087	12457	Noct	protein_coding	nocturnin [Source:MGI Symbol;Acc:MGI:109382]	-3.32062	-1.73145	-1.94368	-1.51923	1.26271e-18	2.11388e-17
ENSMUSG00000060098	214572	Prmt7	protein_coding	protein arginine N-methyltransferase 7 [Source:MGI Symbol;Acc:MGI:2384879]	-2.67495	-1.41951	-1.59346	-1.24557	1.25215e-18	2.09876e-17
ENSMUSG00000037868	13654	Egr2	protein_coding	early growth response 2 [Source:MGI Symbol;Acc:MGI:95296]	-2.38369	-1.2532	-1.40604	-1.10035	1.07391e-18	1.81541e-17
ENSMUSG00000022505	13731	Emp2	protein_coding	epithelial membrane protein 2 [Source:MGI Symbol;Acc:MGI:1098726]	-3.16938	-1.6642	-1.86706	-1.46134	1.05472e-18	1.78514e-17
ENSMUSG00000033949	28105	Trim36	protein_coding	tripartite motif-containing 36 [Source:MGI Symbol;Acc:MGI:106264]	-3.25957	-1.70468	-1.90983	-1.49954	6.93578e-19	1.19437e-17
ENSMUSG00000036526	108723	Card11	protein_coding	caspase recruitment domain family, member 11 [Source:MGI Symbol;Acc:MGI:1916978]	-3.36553	-1.75083	-1.96149	-1.54018	6.88963e-19	1.18874e-17
ENSMUSG00000041762	68526	Gpr155	protein_coding	G protein-coupled receptor 155 [Source:MGI Symbol;Acc:MGI:1915776]	-4.13798	-2.04893	-2.29504	-1.80281	6.52966e-19	1.13148e-17
ENSMUSG00000004633	69993	Chn2	protein_coding	chimerin 2 [Source:MGI Symbol;Acc:MGI:1917243]	-6.2323	-2.63976	-2.95683	-2.3227	6.51415e-19	1.13021e-17
ENSMUSG00000005410	17218	Mcm5	protein_coding	minichromosome maintenance complex component 5 [Source:MGI Symbol;Acc:MGI:103197]	-3.48797	-1.80239	-2.01856	-1.58622	6.20919e-19	1.08018e-17
ENSMUSG00000059994	229499	Fcrl1	protein_coding	Fc receptor-like 1 [Source:MGI Symbol;Acc:MGI:2442862]	-3.27013	-1.70935	-1.91356	-1.50513	5.47009e-19	9.61123e-18
ENSMUSG00000053559	207818	Smagp	protein_coding	small cell adhesion glycoprotein [Source:MGI Symbol;Acc:MGI:2448476]	-2.42586	-1.2785	-1.43104	-1.12596	5.23169e-19	9.23932e-18
ENSMUSG00000018341	16162	Il12rb2	protein_coding	interleukin 12 receptor, beta 2 [Source:MGI Symbol;Acc:MGI:1270861]	-3.89555	-1.96183	-2.19484	-1.72881	4.51778e-19	8.06088e-18
ENSMUSG00000030737	101488	Slco2b1	protein_coding	solute carrier organic anion transporter family, member 2b1 [Source:MGI Symbol;Acc:MGI:1351872]	-18.2363	-4.18874	-4.68513	-3.69236	4.19076e-19	7.50645e-18
ENSMUSG00000039976	207592	Tbc1d16	protein_coding	TBC1 domain family, member 16 [Source:MGI Symbol;Acc:MGI:2652878]	-3.08678	-1.6261	-1.81836	-1.43384	3.88829e-19	7.01923e-18
ENSMUSG00000064370	17711	mt-Cytb	protein_coding	mitochondrially encoded cytochrome b [Source:MGI Symbol;Acc:MGI:102501]	-2.36681	-1.24294	-1.38944	-1.09645	3.50341e-19	6.35763e-18
ENSMUSG00000049119	242297	Fam110b	protein_coding	family with sequence similarity 110, member B [Source:MGI Symbol;Acc:MGI:1916593]	-3.2388	-1.69546	-1.8947	-1.49622	3.18137e-19	5.81136e-18
ENSMUSG00000001228	18140	Uhrf1	protein_coding	ubiquitin-like, containing PHD and RING finger domains, 1 [Source:MGI Symbol;Acc:MGI:1338889]	-3.8223	-1.93444	-2.1597	-1.70918	2.35648e-19	4.36801e-18
ENSMUSG00000047747	330812	Rnf150	protein_coding	ring finger protein 150 [Source:MGI Symbol;Acc:MGI:2443860]	-2.0905	-1.06384	-1.18763	-0.940059	2.29746e-19	4.27005e-18
ENSMUSG00000059401	333639	Mamld1	protein_coding	mastermind-like domain containing 1 [Source:MGI Symbol;Acc:MGI:3045303]	-3.18615	-1.67181	-1.86418	-1.47945	1.58894e-19	3.00574e-18
ENSMUSG00000000489	18591	Pdgfb	protein_coding	platelet derived growth factor, B polypeptide [Source:MGI Symbol;Acc:MGI:97528]	-2.49341	-1.31812	-1.46898	-1.16726	1.33138e-19	2.55699e-18
ENSMUSG00000004891	18008	Nes	protein_coding	nestin [Source:MGI Symbol;Acc:MGI:101784]	-11.1784	-3.48264	-3.87798	-3.0873	1.01604e-19	1.97884e-18
ENSMUSG00000002870	17216	Mcm2	protein_coding	minichromosome maintenance complex component 2 [Source:MGI Symbol;Acc:MGI:105380]	-2.77461	-1.47229	-1.63857	-1.306	8.59219e-20	1.69008e-18
ENSMUSG00000057706	108797	Mex3b	protein_coding	mex3 RNA binding family member B [Source:MGI Symbol;Acc:MGI:1918252]	-3.55315	-1.8291	-2.03556	-1.62264	8.41105e-20	1.65681e-18
ENSMUSG00000007682	13371	Dio2	protein_coding	deiodinase, iodothyronine, type II [Source:MGI Symbol;Acc:MGI:1338833]	-2.95952	-1.56536	-1.74106	-1.38967	6.9765e-20	1.39208e-18
ENSMUSG00000008305	21885	Tle1	protein_coding	transducin-like enhancer of split 1 [Source:MGI Symbol;Acc:MGI:104636]	-3.77412	-1.91614	-2.1312	-1.70108	6.97344e-20	1.39208e-18
ENSMUSG00000024084	70536	Qpct	protein_coding	glutaminyl-peptide cyclotransferase (glutaminyl cyclase) [Source:MGI Symbol;Acc:MGI:1917786]	-4.18132	-2.06396	-2.29559	-1.83232	6.95521e-20	1.39185e-18
ENSMUSG00000037999	212285	Arap2	protein_coding	ArfGAP with RhoGAP domain, ankyrin repeat and PH domain 2 [Source:MGI Symbol;Acc:MGI:2684416]	-4.50676	-2.17209	-2.41508	-1.9291	6.25622e-20	1.26109e-18
ENSMUSG00000031355	11856	Arhgap6	protein_coding	Rho GTPase activating protein 6 [Source:MGI Symbol;Acc:MGI:1196332]	-2.50682	-1.32586	-1.47351	-1.17821	5.37293e-20	1.09582e-18
ENSMUSG00000033207	71738	Mamdc2	protein_coding	MAM domain containing 2 [Source:MGI Symbol;Acc:MGI:1918988]	-7.34305	-2.87638	-3.19657	-2.55619	5.30606e-20	1.08378e-18
ENSMUSG00000037235	17122	Mxd4	protein_coding	Max dimerization protein 4 [Source:MGI Symbol;Acc:MGI:104991]	-2.03959	-1.02828	-1.1425	-0.91406	4.94117e-20	1.01886e-18
ENSMUSG00000035759	71769	Bbs10	protein_coding	Bardet-Biedl syndrome 10 (human) [Source:MGI Symbol;Acc:MGI:1919019]	-2.88673	-1.52944	-1.69931	-1.35957	4.92609e-20	1.0182e-18
ENSMUSG00000023809	20112	Rps6ka2	protein_coding	ribosomal protein S6 kinase, polypeptide 2 [Source:MGI Symbol;Acc:MGI:1342290]	-2.07429	-1.05262	-1.1692	-0.936027	4.49158e-20	9.35384e-19
ENSMUSG00000020654	104111	Adcy3	protein_coding	adenylate cyclase 3 [Source:MGI Symbol;Acc:MGI:99675]	-5.33033	-2.41423	-2.68051	-2.14794	3.90688e-20	8.19792e-19
ENSMUSG00000066687	235320	Zbtb16	protein_coding	zinc finger and BTB domain containing 16 [Source:MGI Symbol;Acc:MGI:103222]	-11.2174	-3.48766	-3.87083	-3.10449	3.4267e-20	7.25642e-19
ENSMUSG00000039031	73910	Arhgap18	protein_coding	Rho GTPase activating protein 18 [Source:MGI Symbol;Acc:MGI:1921160]	-2.4685	-1.30364	-1.44567	-1.1616	2.59382e-20	5.65253e-19
ENSMUSG00000030329	319352	Pianp	protein_coding	PILR alpha associated neural protein [Source:MGI Symbol;Acc:MGI:2441908]	-3.62758	-1.85901	-2.06155	-1.65646	2.59571e-20	5.65253e-19
ENSMUSG00000050022	231842	Amz1	protein_coding	archaelysin family metallopeptidase 1 [Source:MGI Symbol;Acc:MGI:2442258]	-3.31409	-1.72861	-1.9162	-1.54102	2.27409e-20	5.02334e-19
ENSMUSG00000037907	268445	Ankrd13b	protein_coding	ankyrin repeat domain 13b [Source:MGI Symbol;Acc:MGI:2144501]	-2.99646	-1.58326	-1.75479	-1.41172	2.15182e-20	4.77615e-19
ENSMUSG00000005533	16001	Igf1r	protein_coding	insulin-like growth factor I receptor [Source:MGI Symbol;Acc:MGI:96433]	-2.85824	-1.51513	-1.6791	-1.35115	2.0763e-20	4.62337e-19
ENSMUSG00000039115	104099	Itga9	protein_coding	integrin alpha 9 [Source:MGI Symbol;Acc:MGI:104756]	-2.67202	-1.41793	-1.57088	-1.26498	1.85826e-20	4.15121e-19
ENSMUSG00000022494	72555	Shisa9	protein_coding	shisa family member 9 [Source:MGI Symbol;Acc:MGI:1919805]	-46.1089	-5.52697	-6.12175	-4.93219	1.71736e-20	3.8614e-19
ENSMUSG00000040537	11496	Adam22	protein_coding	a disintegrin and metallopeptidase domain 22 [Source:MGI Symbol;Acc:MGI:1340046]	-4.11228	-2.03994	-2.25901	-1.82086	1.60372e-20	3.64142e-19
ENSMUSG00000006585	67177	Cdt1	protein_coding	chromatin licensing and DNA replication factor 1 [Source:MGI Symbol;Acc:MGI:1914427]	-2.33201	-1.22157	-1.35196	-1.09118	1.30797e-20	3.01443e-19
ENSMUSG00000071669	74478	Snx29	protein_coding	sorting nexin 29 [Source:MGI Symbol;Acc:MGI:1921728]	-2.38735	-1.25541	-1.38935	-1.12147	1.2854e-20	2.96737e-19
ENSMUSG00000027068	241452	Dhrs9	protein_coding	dehydrogenase/reductase (SDR family) member 9 [Source:MGI Symbol;Acc:MGI:2442798]	-3.23152	-1.69221	-1.87253	-1.51189	1.23448e-20	2.8735e-19
ENSMUSG00000022346	17869	Myc	protein_coding	myelocytomatosis oncogene [Source:MGI Symbol;Acc:MGI:97250]	-7.03259	-2.81406	-3.11361	-2.5145	1.19335e-20	2.79216e-19
ENSMUSG00000041552	211612	Ptchd1	protein_coding	patched domain containing 1 [Source:MGI Symbol;Acc:MGI:2685233]	-8.06848	-3.0123	-3.33292	-2.69168	1.18848e-20	2.78548e-19
ENSMUSG00000070348	12443	Ccnd1	protein_coding	cyclin D1 [Source:MGI Symbol;Acc:MGI:88313]	-4.65654	-2.21926	-2.4542	-1.98432	9.91739e-21	2.34423e-19
ENSMUSG00000054150	212073	Syne3	protein_coding	spectrin repeat containing, nuclear envelope family member 3 [Source:MGI Symbol;Acc:MGI:2442408]	-2.72412	-1.44579	-1.59871	-1.29287	9.61316e-21	2.27621e-19
ENSMUSG00000005583	17260	Mef2c	protein_coding	myocyte enhancer factor 2C [Source:MGI Symbol;Acc:MGI:99458]	-2.07907	-1.05594	-1.16708	-0.944798	8.16687e-21	1.95046e-19
ENSMUSG00000089762	72500	Ier5l	protein_coding	immediate early response 5-like [Source:MGI Symbol;Acc:MGI:1919750]	-6.23452	-2.64028	-2.91762	-2.36294	7.62989e-21	1.8317e-19
ENSMUSG00000026170	104086	Cyp27a1	protein_coding	cytochrome P450, family 27, subfamily a, polypeptide 1 [Source:MGI Symbol;Acc:MGI:88594]	-2.10823	-1.07603	-1.18843	-0.963634	6.32381e-21	1.53954e-19
ENSMUSG00000001270	12709	Ckb	protein_coding	creatine kinase, brain [Source:MGI Symbol;Acc:MGI:88407]	-2.53477	-1.34186	-1.48134	-1.20236	5.37637e-21	1.31583e-19
ENSMUSG00000023990	21425	Tfeb	protein_coding	transcription factor EB [Source:MGI Symbol;Acc:MGI:103270]	-2.02589	-1.01856	-1.12403	-0.913087	4.71463e-21	1.16418e-19
ENSMUSG00000019966	17311	Kitl	protein_coding	kit ligand [Source:MGI Symbol;Acc:MGI:96974]	-4.43451	-2.14877	-2.3706	-1.92695	4.25295e-21	1.06727e-19
ENSMUSG00000074505	270120	Fat3	protein_coding	FAT atypical cadherin 3 [Source:MGI Symbol;Acc:MGI:2444314]	-3.93952	-1.97802	-2.18148	-1.77456	3.76644e-21	9.55639e-20
ENSMUSG00000048142	269642	Nat8l	protein_coding	N-acetyltransferase 8-like [Source:MGI Symbol;Acc:MGI:2447776]	-8.47174	-3.08266	-3.39959	-2.76572	3.70695e-21	9.43824e-20
ENSMUSG00000022091	20410	Sorbs3	protein_coding	sorbin and SH3 domain containing 3 [Source:MGI Symbol;Acc:MGI:700013]	-2.70287	-1.43449	-1.58192	-1.28706	3.66378e-21	9.34737e-20
ENSMUSG00000030789	16411	Itgax	protein_coding	integrin alpha X [Source:MGI Symbol;Acc:MGI:96609]	-8.889	-3.15202	-3.47553	-2.82852	3.4964e-21	8.98206e-20
ENSMUSG00000013089	104156	Etv5	protein_coding	ets variant 5 [Source:MGI Symbol;Acc:MGI:1096867]	-2.50388	-1.32417	-1.45954	-1.1888	3.06101e-21	7.93579e-20
ENSMUSG00000032035	23871	Ets1	protein_coding	E26 avian leukemia oncogene 1, 5' domain [Source:MGI Symbol;Acc:MGI:95455]	-6.44338	-2.68782	-2.96247	-2.41316	3.01668e-21	7.84109e-20
ENSMUSG00000032589	12217	Bsn	protein_coding	bassoon [Source:MGI Symbol;Acc:MGI:1277955]	-2.7283	-1.448	-1.59573	-1.30027	2.85867e-21	7.50088e-20
ENSMUSG00000031824	234797	6430548M08Rik	protein_coding	RIKEN cDNA 6430548M08 gene [Source:MGI Symbol;Acc:MGI:2443793]	-2.06877	-1.04877	-1.15462	-0.942927	1.98273e-21	5.34447e-20
ENSMUSG00000037341	236727	Slc9a7	protein_coding	solute carrier family 9 (sodium/hydrogen exchanger), member 7 [Source:MGI Symbol;Acc:MGI:2444530]	-2.07135	-1.05057	-1.15593	-0.945213	1.59873e-21	4.38636e-20
ENSMUSG00000026748	67448	Plxdc2	protein_coding	plexin domain containing 2 [Source:MGI Symbol;Acc:MGI:1914698]	-2.01027	-1.00739	-1.10805	-0.906731	1.41434e-21	3.92722e-20
ENSMUSG00000023066	246102	Rttn	protein_coding	rotatin [Source:MGI Symbol;Acc:MGI:2179288]	-4.04301	-2.01543	-2.21643	-1.81442	1.32632e-21	3.69764e-20
ENSMUSG00000029650	71706	Slc46a3	protein_coding	solute carrier family 46, member 3 [Source:MGI Symbol;Acc:MGI:1918956]	-3.0209	-1.59498	-1.754	-1.43595	1.31341e-21	3.66907e-20
ENSMUSG00000070738	227333	Dgkd	protein_coding	diacylglycerol kinase, delta [Source:MGI Symbol;Acc:MGI:2138334]	-2.04867	-1.03469	-1.13782	-0.931562	1.2986e-21	3.63503e-20
ENSMUSG00000045875	11549	Adra1a	protein_coding	adrenergic receptor, alpha 1a [Source:MGI Symbol;Acc:MGI:104773]	-3.34096	-1.74026	-1.91346	-1.56707	1.2346e-21	3.46993e-20
ENSMUSG00000033174	23945	Mgll	protein_coding	monoglyceride lipase [Source:MGI Symbol;Acc:MGI:1346042]	-7.96245	-2.99321	-3.29006	-2.69636	1.09643e-21	3.11324e-20
ENSMUSG00000032254	71819	Kif23	protein_coding	kinesin family member 23 [Source:MGI Symbol;Acc:MGI:1919069]	-4.80631	-2.26493	-2.48743	-2.04243	7.93768e-22	2.31566e-20
ENSMUSG00000053617	14218	Sh3pxd2a	protein_coding	SH3 and PX domains 2A [Source:MGI Symbol;Acc:MGI:1298393]	-2.44132	-1.28766	-1.41384	-1.16148	7.29963e-22	2.14308e-20
ENSMUSG00000026355	17219	Mcm6	protein_coding	minichromosome maintenance complex component 6 [Source:MGI Symbol;Acc:MGI:1298227]	-2.38345	-1.25305	-1.3756	-1.1305	6.83063e-22	2.02257e-20
ENSMUSG00000030649	75430	Anapc15	protein_coding	anaphase prompoting complex C subunit 15 [Source:MGI Symbol;Acc:MGI:1922680]	-3.96977	-1.98906	-2.18218	-1.79593	5.33488e-22	1.60023e-20
ENSMUSG00000052688	226421	Rab7b	protein_coding	RAB7B, member RAS oncogene family [Source:MGI Symbol;Acc:MGI:2442295]	-2.18266	-1.12609	-1.23419	-1.01798	3.62844e-22	1.14032e-20
ENSMUSG00000037224	231125	Zfyve28	protein_coding	zinc finger, FYVE domain containing 28 [Source:MGI Symbol;Acc:MGI:2684992]	-5.82876	-2.54319	-2.78633	-2.30005	3.15097e-22	1.01094e-20
ENSMUSG00000008734	64297	Gprc5b	protein_coding	G protein-coupled receptor, family C, group 5, member B [Source:MGI Symbol;Acc:MGI:1927596]	-5.09552	-2.34923	-2.57185	-2.1266	2.33199e-22	7.69611e-21
ENSMUSG00000001930	22371	Vwf	protein_coding	Von Willebrand factor [Source:MGI Symbol;Acc:MGI:98941]	-2.32155	-1.21509	-1.33021	-1.09997	2.31429e-22	7.65599e-21
ENSMUSG00000063450	319565	Syne2	protein_coding	spectrin repeat containing, nuclear envelope 2 [Source:MGI Symbol;Acc:MGI:2449316]	-3.84196	-1.94184	-2.12492	-1.75876	1.95779e-22	6.60302e-21
ENSMUSG00000041633	207474	Kctd12b	protein_coding	potassium channel tetramerisation domain containing 12b [Source:MGI Symbol;Acc:MGI:2444667]	-2.8522	-1.51208	-1.65452	-1.36963	1.90454e-22	6.45489e-21
ENSMUSG00000050390	97130	C77080	protein_coding	expressed sequence C77080 [Source:MGI Symbol;Acc:MGI:2140651]	-2.04385	-1.03129	-1.12834	-0.934239	1.83624e-22	6.25409e-21
ENSMUSG00000054027	103466	Nt5dc3	protein_coding	5'-nucleotidase domain containing 3 [Source:MGI Symbol;Acc:MGI:3513266]	-2.18169	-1.12545	-1.23085	-1.02004	1.56158e-22	5.38492e-21
ENSMUSG00000021822	18792	Plau	protein_coding	plasminogen activator, urokinase [Source:MGI Symbol;Acc:MGI:97611]	-2.66946	-1.41655	-1.54873	-1.28436	1.3754e-22	4.79069e-21
ENSMUSG00000047875	269604	Gpr157	protein_coding	G protein-coupled receptor 157 [Source:MGI Symbol;Acc:MGI:2442046]	-4.01117	-2.00402	-2.18912	-1.81893	9.68202e-23	3.4329e-21
ENSMUSG00000019823	171580	Mical1	protein_coding	microtubule associated monooxygenase, calponin and LIM domain containing 1 [Source:MGI Symbol;Acc:MGI:2385847]	-2.9654	-1.56823	-1.71202	-1.42443	7.54708e-23	2.71068e-21
ENSMUSG00000006360	12925	Crip1	protein_coding	cysteine-rich protein 1 (intestinal) [Source:MGI Symbol;Acc:MGI:88501]	-2.45945	-1.29834	-1.41655	-1.18013	5.92338e-23	2.16689e-21
ENSMUSG00000096210	14958	H1f0	protein_coding	H1 histone family, member 0 [Source:MGI Symbol;Acc:MGI:95893]	-2.25622	-1.17391	-1.28076	-1.06705	5.87758e-23	2.15584e-21
ENSMUSG00000034656	12286	Cacna1a	protein_coding	calcium channel, voltage-dependent, P/Q type, alpha 1A subunit [Source:MGI Symbol;Acc:MGI:109482]	-2.89747	-1.53479	-1.67405	-1.39553	5.26118e-23	1.94523e-21
ENSMUSG00000044629	380686	Cnrip1	protein_coding	cannabinoid receptor interacting protein 1 [Source:MGI Symbol;Acc:MGI:1917505]	-4.4498	-2.15374	-2.34913	-1.95835	5.23442e-23	1.94053e-21
ENSMUSG00000035064	13631	Eef2k	protein_coding	eukaryotic elongation factor-2 kinase [Source:MGI Symbol;Acc:MGI:1195261]	-5.34095	-2.4171	-2.63477	-2.19942	4.06357e-23	1.52693e-21
ENSMUSG00000074607	269389	Tox2	protein_coding	TOX high mobility group box family member 2 [Source:MGI Symbol;Acc:MGI:3611233]	-43.9581	-5.45806	-5.94944	-4.96667	4.02202e-23	1.51957e-21
ENSMUSG00000020689	16416	Itgb3	protein_coding	integrin beta 3 [Source:MGI Symbol;Acc:MGI:96612]	-7.39184	-2.88593	-3.14556	-2.62631	3.92022e-23	1.48517e-21
ENSMUSG00000026014	77300	Raph1	protein_coding	Ras association (RalGDS/AF-6) and pleckstrin homology domains 1 [Source:MGI Symbol;Acc:MGI:1924550]	-2.16737	-1.11595	-1.21632	-1.01557	3.89414e-23	1.47934e-21
ENSMUSG00000027765	18441	P2ry1	protein_coding	purinergic receptor P2Y, G-protein coupled 1 [Source:MGI Symbol;Acc:MGI:105049]	-8.76094	-3.13109	-3.41216	-2.85001	3.64111e-23	1.39086e-21
ENSMUSG00000038175	218203	Mylip	protein_coding	myosin regulatory light chain interacting protein [Source:MGI Symbol;Acc:MGI:2388271]	-2.07193	-1.05097	-1.14476	-0.957184	2.97156e-23	1.14459e-21
ENSMUSG00000025154	71085	Arhgap19	protein_coding	Rho GTPase activating protein 19 [Source:MGI Symbol;Acc:MGI:1918335]	-2.76952	-1.46963	-1.60046	-1.33881	2.72519e-23	1.06452e-21
ENSMUSG00000074212	70604	Dnajb14	protein_coding	DnaJ heat shock protein family (Hsp40) member B14 [Source:MGI Symbol;Acc:MGI:1917854]	-2.39615	-1.26072	-1.37265	-1.14879	2.49043e-23	9.8113e-22
ENSMUSG00000027955	68659	Fam198b	protein_coding	family with sequence similarity 198, member B [Source:MGI Symbol;Acc:MGI:1915909]	-4.94077	-2.30474	-2.50918	-2.10029	2.41734e-23	9.57792e-22
ENSMUSG00000004105	26360	Angptl2	protein_coding	angiopoietin-like 2 [Source:MGI Symbol;Acc:MGI:1347002]	-4.49029	-2.16681	-2.35804	-1.97558	2.02723e-23	8.14898e-22
ENSMUSG00000030342	12527	Cd9	protein_coding	CD9 antigen [Source:MGI Symbol;Acc:MGI:88348]	-2.12857	-1.08989	-1.18598	-0.993792	1.96053e-23	7.90384e-22
ENSMUSG00000041058	107568	Wwp1	protein_coding	WW domain containing E3 ubiquitin protein ligase 1 [Source:MGI Symbol;Acc:MGI:1861728]	-2.3433	-1.22854	-1.33612	-1.12096	1.54689e-23	6.36621e-22
ENSMUSG00000068747	20661	Sort1	protein_coding	sortilin 1 [Source:MGI Symbol;Acc:MGI:1338015]	-2.94491	-1.55822	-1.6945	-1.42195	1.48185e-23	6.15347e-22
ENSMUSG00000035967	236790	Ints6l	protein_coding	integrator complex subunit 6 like [Source:MGI Symbol;Acc:MGI:2442593]	-2.19945	-1.13714	-1.23658	-1.03771	1.47182e-23	6.13023e-22
ENSMUSG00000061589	208266	Dot1l	protein_coding	DOT1-like, histone H3 methyltransferase (S. cerevisiae) [Source:MGI Symbol;Acc:MGI:2143886]	-2.11334	-1.07953	-1.17358	-0.985478	1.29721e-23	5.48556e-22
ENSMUSG00000024589	83814	Nedd4l	protein_coding	neural precursor cell expressed, developmentally down-regulated gene 4-like [Source:MGI Symbol;Acc:MGI:1933754]	-2.52042	-1.33366	-1.44973	-1.21759	1.25149e-23	5.30847e-22
ENSMUSG00000038370	66425	Pcp4l1	protein_coding	Purkinje cell protein 4-like 1 [Source:MGI Symbol;Acc:MGI:1913675]	-7.68489	-2.94202	-3.19779	-2.68626	1.20522e-23	5.12792e-22
ENSMUSG00000031295	110094	Phka2	protein_coding	phosphorylase kinase alpha 2 [Source:MGI Symbol;Acc:MGI:97577]	-2.33646	-1.22433	-1.32998	-1.11868	9.32644e-24	4.05553e-22
ENSMUSG00000056153	54607	Socs6	protein_coding	suppressor of cytokine signaling 6 [Source:MGI Symbol;Acc:MGI:1924885]	-2.6508	-1.40643	-1.52776	-1.28509	9.23614e-24	4.02894e-22
ENSMUSG00000028121	29815	Bcar3	protein_coding	breast cancer anti-estrogen resistance 3 [Source:MGI Symbol;Acc:MGI:1352501]	-3.35565	-1.74659	-1.89695	-1.59623	8.59386e-24	3.77257e-22
ENSMUSG00000064373	20363	Selenop	protein_coding	selenoprotein P [Source:MGI Symbol;Acc:MGI:894288]	-2.9887	-1.57952	-1.71495	-1.44409	7.47629e-24	3.3457e-22
ENSMUSG00000041773	13803	Enc1	protein_coding	ectodermal-neural cortex 1 [Source:MGI Symbol;Acc:MGI:109610]	-2.66801	-1.41576	-1.53694	-1.29459	7.01902e-24	3.17186e-22
ENSMUSG00000024900	12894	Cpt1a	protein_coding	carnitine palmitoyltransferase 1a, liver [Source:MGI Symbol;Acc:MGI:1098296]	-2.02659	-1.01905	-1.10623	-0.931875	6.90643e-24	3.13122e-22
ENSMUSG00000029177	12615	Cenpa	protein_coding	centromere protein A [Source:MGI Symbol;Acc:MGI:88375]	-5.38126	-2.42794	-2.63522	-2.22067	6.42743e-24	2.95278e-22
ENSMUSG00000024659	16952	Anxa1	protein_coding	annexin A1 [Source:MGI Symbol;Acc:MGI:96819]	-2.26094	-1.17692	-1.27727	-1.07658	6.15503e-24	2.83706e-22
ENSMUSG00000005580	11515	Adcy9	protein_coding	adenylate cyclase 9 [Source:MGI Symbol;Acc:MGI:108450]	-2.58575	-1.37058	-1.48712	-1.25404	5.59451e-24	2.6224e-22
ENSMUSG00000025810	18186	Nrp1	protein_coding	neuropilin 1 [Source:MGI Symbol;Acc:MGI:106206]	-2.29205	-1.19664	-1.2983	-1.09498	5.42795e-24	2.55299e-22
ENSMUSG00000021838	74480	Samd4	protein_coding	sterile alpha motif domain containing 4 [Source:MGI Symbol;Acc:MGI:1921730]	-14.3133	-3.83929	-4.16441	-3.51417	4.85495e-24	2.29912e-22
ENSMUSG00000000440	19016	Pparg	protein_coding	peroxisome proliferator activated receptor gamma [Source:MGI Symbol;Acc:MGI:97747]	-10.5282	-3.39619	-3.68355	-3.10881	4.72549e-24	2.2455e-22
ENSMUSG00000058672	22151	Tubb2a	protein_coding	tubulin, beta 2A class IIA [Source:MGI Symbol;Acc:MGI:107861]	-2.94678	-1.55914	-1.68885	-1.42942	2.62898e-24	1.303e-22
ENSMUSG00000051043	70355	Gprc5c	protein_coding	G protein-coupled receptor, family C, group 5, member C [Source:MGI Symbol;Acc:MGI:1917605]	-12.8298	-3.68142	-3.9861	-3.37675	2.18943e-24	1.09298e-22
ENSMUSG00000052512	78286	Nav2	protein_coding	neuron navigator 2 [Source:MGI Symbol;Acc:MGI:2183691]	-3.06903	-1.61778	-1.75155	-1.48402	2.11922e-24	1.06176e-22
ENSMUSG00000000149	14673	Gna12	protein_coding	guanine nucleotide binding protein, alpha 12 [Source:MGI Symbol;Acc:MGI:95767]	-2.16319	-1.11316	-1.20476	-1.02156	1.79562e-24	9.09519e-23
ENSMUSG00000031129	331004	Slc9a9	protein_coding	solute carrier family 9 (sodium/hydrogen exchanger), member 9 [Source:MGI Symbol;Acc:MGI:2679732]	-2.39992	-1.26298	-1.36642	-1.15955	1.52152e-24	7.87996e-23
ENSMUSG00000034858	235493	Fam214a	protein_coding	family with sequence similarity 214, member A [Source:MGI Symbol;Acc:MGI:2387648]	-7.27165	-2.86228	-3.09635	-2.62821	1.44535e-24	7.54199e-23
ENSMUSG00000035181	320487	Heatr5a	protein_coding	HEAT repeat containing 5A [Source:MGI Symbol;Acc:MGI:2444133]	-2.13242	-1.09249	-1.18072	-1.00426	9.34448e-25	5.14803e-23
ENSMUSG00000026389	68428	Steap3	protein_coding	STEAP family member 3 [Source:MGI Symbol;Acc:MGI:1915678]	-2.39242	-1.25847	-1.36004	-1.1569	9.14797e-25	5.05992e-23
ENSMUSG00000034652	217303	Cd300a	protein_coding	CD300A molecule [Source:MGI Symbol;Acc:MGI:2443411]	-2.46725	-1.3029	-1.40791	-1.19789	8.70315e-25	4.87236e-23
ENSMUSG00000027342	18538	Pcna	protein_coding	proliferating cell nuclear antigen [Source:MGI Symbol;Acc:MGI:97503]	-2.59028	-1.37311	-1.48372	-1.26249	8.56019e-25	4.8118e-23
ENSMUSG00000028207	65973	Asph	protein_coding	aspartate-beta-hydroxylase [Source:MGI Symbol;Acc:MGI:1914186]	-2.63164	-1.39596	-1.50802	-1.2839	7.57124e-25	4.29079e-23
ENSMUSG00000039908	268512	Slc26a11	protein_coding	solute carrier family 26, member 11 [Source:MGI Symbol;Acc:MGI:2444589]	-3.94577	-1.98031	-2.13895	-1.82167	7.05215e-25	4.02963e-23
ENSMUSG00000033857	217364	Engase	protein_coding	endo-beta-N-acetylglucosaminidase [Source:MGI Symbol;Acc:MGI:2443788]	-5.73125	-2.51885	-2.72058	-2.31712	6.98567e-25	4.00821e-23
ENSMUSG00000031613	15446	Hpgd	protein_coding	hydroxyprostaglandin dehydrogenase 15 (NAD) [Source:MGI Symbol;Acc:MGI:108085]	-14.3876	-3.84675	-4.1542	-3.5393	6.50109e-25	3.74571e-23
ENSMUSG00000023150	117198	Ivns1abp	protein_coding	influenza virus NS1A binding protein [Source:MGI Symbol;Acc:MGI:2152389]	-2.42556	-1.27832	-1.38041	-1.17623	6.3361e-25	3.66592e-23
ENSMUSG00000020661	13435	Dnmt3a	protein_coding	DNA methyltransferase 3A [Source:MGI Symbol;Acc:MGI:1261827]	-2.18586	-1.1282	-1.21809	-1.03832	5.82015e-25	3.38155e-23
ENSMUSG00000041695	16518	Kcnj2	protein_coding	potassium inwardly-rectifying channel, subfamily J, member 2 [Source:MGI Symbol;Acc:MGI:104744]	-2.25985	-1.17623	-1.26857	-1.08389	3.47566e-25	2.20465e-23
ENSMUSG00000024030	11307	Abcg1	protein_coding	ATP binding cassette subfamily G member 1 [Source:MGI Symbol;Acc:MGI:107704]	-2.26012	-1.1764	-1.26844	-1.08437	3.08131e-25	1.98178e-23
ENSMUSG00000039206	231871	Daglb	protein_coding	diacylglycerol lipase, beta [Source:MGI Symbol;Acc:MGI:2442032]	-2.5161	-1.33119	-1.43477	-1.22761	2.54703e-25	1.66921e-23
ENSMUSG00000066026	20148	Dhrs3	protein_coding	dehydrogenase/reductase (SDR family) member 3 [Source:MGI Symbol;Acc:MGI:1315215]	-2.31236	-1.20936	-1.30335	-1.11538	2.44442e-25	1.6096e-23
ENSMUSG00000048120	12495	Entpd1	protein_coding	ectonucleoside triphosphate diphosphohydrolase 1 [Source:MGI Symbol;Acc:MGI:102805]	-3.16721	-1.66321	-1.79237	-1.53406	2.37569e-25	1.58701e-23
ENSMUSG00000022353	211401	Mtss1	protein_coding	metastasis suppressor 1 [Source:MGI Symbol;Acc:MGI:2384818]	-2.87081	-1.52146	-1.6394	-1.40351	2.2358e-25	1.50081e-23
ENSMUSG00000015396	12522	Cd83	protein_coding	CD83 antigen [Source:MGI Symbol;Acc:MGI:1328316]	-3.06716	-1.6169	-1.74172	-1.49209	1.9321e-25	1.31612e-23
ENSMUSG00000025932	14048	Eya1	protein_coding	EYA transcriptional coactivator and phosphatase 1 [Source:MGI Symbol;Acc:MGI:109344]	-2.39107	-1.25766	-1.35312	-1.1622	1.06944e-25	7.50669e-24
ENSMUSG00000055013	347722	Agap1	protein_coding	ArfGAP with GTPase domain, ankyrin repeat and PH domain 1 [Source:MGI Symbol;Acc:MGI:2653690]	-2.364	-1.24123	-1.33541	-1.14705	1.05555e-25	7.44704e-24
ENSMUSG00000034522	380912	Zfp395	protein_coding	zinc finger protein 395 [Source:MGI Symbol;Acc:MGI:2682318]	-3.63405	-1.86158	-2.00281	-1.72035	1.05036e-25	7.44704e-24
ENSMUSG00000032788	216134	Pdxk	protein_coding	pyridoxal (pyridoxine, vitamin B6) kinase [Source:MGI Symbol;Acc:MGI:1351869]	-2.38838	-1.25603	-1.35073	-1.16133	8.45045e-26	6.10641e-24
ENSMUSG00000048285	319710	Frmd6	protein_coding	FERM domain containing 6 [Source:MGI Symbol;Acc:MGI:2442579]	-5.04765	-2.33561	-2.5116	-2.15962	8.27107e-26	6.01959e-24
ENSMUSG00000041797	217262	Abca9	protein_coding	ATP-binding cassette, sub-family A (ABC1), member 9 [Source:MGI Symbol;Acc:MGI:2386796]	-3.12783	-1.64516	-1.76909	-1.52124	8.18392e-26	5.98769e-24
ENSMUSG00000037306	230815	Man1c1	protein_coding	mannosidase, alpha, class 1C, member 1 [Source:MGI Symbol;Acc:MGI:2446214]	-2.63207	-1.3962	-1.50068	-1.29171	6.5011e-26	4.83318e-24
ENSMUSG00000029207	11787	Apbb2	protein_coding	amyloid beta (A4) precursor protein-binding, family B, member 2 [Source:MGI Symbol;Acc:MGI:108405]	-2.08639	-1.06101	-1.13954	-0.982472	4.4218e-26	3.43509e-24
ENSMUSG00000030605	17304	Mfge8	protein_coding	milk fat globule-EGF factor 8 protein [Source:MGI Symbol;Acc:MGI:102768]	-2.63479	-1.39769	-1.49964	-1.29574	2.64313e-26	2.24229e-24
ENSMUSG00000032076	54725	Cadm1	protein_coding	cell adhesion molecule 1 [Source:MGI Symbol;Acc:MGI:1889272]	-3.0925	-1.62877	-1.74749	-1.51006	2.57288e-26	2.19616e-24
ENSMUSG00000021756	16195	Il6st	protein_coding	interleukin 6 signal transducer [Source:MGI Symbol;Acc:MGI:96560]	-2.50493	-1.32477	-1.42068	-1.22886	2.02854e-26	1.76419e-24
ENSMUSG00000040249	16971	Lrp1	protein_coding	low density lipoprotein receptor-related protein 1 [Source:MGI Symbol;Acc:MGI:96828]	-2.28056	-1.18939	-1.27548	-1.1033	2.01347e-26	1.76217e-24
ENSMUSG00000040855	194590	Reps2	protein_coding	RALBP1 associated Eps domain containing protein 2 [Source:MGI Symbol;Acc:MGI:2663511]	-4.15081	-2.05339	-2.20126	-1.90552	1.68106e-26	1.4901e-24
ENSMUSG00000021549	218397	Rasa1	protein_coding	RAS p21 protein activator 1 [Source:MGI Symbol;Acc:MGI:97860]	-2.46415	-1.30109	-1.39419	-1.20799	1.34383e-26	1.22253e-24
ENSMUSG00000038332	140742	Sesn1	protein_coding	sestrin 1 [Source:MGI Symbol;Acc:MGI:2155278]	-3.56877	-1.83543	-1.96667	-1.70418	1.31177e-26	1.20127e-24
ENSMUSG00000020593	14245	Lpin1	protein_coding	lipin 1 [Source:MGI Symbol;Acc:MGI:1891340]	-3.40202	-1.76639	-1.89263	-1.64015	1.28694e-26	1.18639e-24
ENSMUSG00000034593	17918	Myo5a	protein_coding	myosin VA [Source:MGI Symbol;Acc:MGI:105976]	-2.26944	-1.18234	-1.26578	-1.09889	8.2707e-27	7.99771e-25
ENSMUSG00000025986	227059	Slc39a10	protein_coding	solute carrier family 39 (zinc transporter), member 10 [Source:MGI Symbol;Acc:MGI:1914515]	-2.87534	-1.52373	-1.63096	-1.41651	7.4538e-27	7.31001e-25
ENSMUSG00000039959	215114	Hip1	protein_coding	huntingtin interacting protein 1 [Source:MGI Symbol;Acc:MGI:1099804]	-2.68222	-1.42343	-1.52338	-1.32348	6.90894e-27	6.87316e-25
ENSMUSG00000032122	56857	Slc37a2	protein_coding	solute carrier family 37 (glycerol-3-phosphate transporter), member 2 [Source:MGI Symbol;Acc:MGI:1929693]	-2.44847	-1.29188	-1.3816	-1.20216	4.67935e-27	4.90197e-25
ENSMUSG00000006800	72043	Sulf2	protein_coding	sulfatase 2 [Source:MGI Symbol;Acc:MGI:1919293]	-7.37573	-2.88279	-3.08259	-2.68298	4.36317e-27	4.67705e-25
ENSMUSG00000038068	218215	Rnf144b	protein_coding	ring finger protein 144B [Source:MGI Symbol;Acc:MGI:2384986]	-5.40955	-2.43551	-2.60362	-2.2674	3.77014e-27	4.07293e-25
ENSMUSG00000056758	15364	Hmga2	protein_coding	high mobility group AT-hook 2 [Source:MGI Symbol;Acc:MGI:101761]	-5.99526	-2.58382	-2.75974	-2.4079	2.31998e-27	2.67066e-25
ENSMUSG00000020658	668212	Efr3b	protein_coding	EFR3 homolog B [Source:MGI Symbol;Acc:MGI:2444851]	-17.9601	-4.16672	-4.45047	-3.88298	2.33693e-27	2.67066e-25
ENSMUSG00000022265	11732	Ank	protein_coding	progressive ankylosis [Source:MGI Symbol;Acc:MGI:3045421]	-3.08155	-1.62366	-1.7339	-1.51341	2.105e-27	2.46678e-25
ENSMUSG00000022415	20972	Syngr1	protein_coding	synaptogyrin 1 [Source:MGI Symbol;Acc:MGI:1328323]	-2.26699	-1.18078	-1.2608	-1.10076	1.9707e-27	2.34922e-25
ENSMUSG00000055322	21961	Tns1	protein_coding	tensin 1 [Source:MGI Symbol;Acc:MGI:104552]	-4.16565	-2.05854	-2.19752	-1.91956	1.72197e-27	2.12602e-25
ENSMUSG00000019302	11975	Atp6v0a1	protein_coding	ATPase, H+ transporting, lysosomal V0 subunit A1 [Source:MGI Symbol;Acc:MGI:103286]	-3.83908	-1.94076	-2.07144	-1.81008	1.56714e-27	1.97004e-25
ENSMUSG00000036853	171166	Mcoln3	protein_coding	mucolipin 3 [Source:MGI Symbol;Acc:MGI:1890500]	-3.61239	-1.85295	-1.97758	-1.72833	1.50396e-27	1.93566e-25
ENSMUSG00000022010	21807	Tsc22d1	protein_coding	TSC22 domain family, member 1 [Source:MGI Symbol;Acc:MGI:109127]	-3.33085	-1.73589	-1.85232	-1.61947	1.36297e-27	1.79496e-25
ENSMUSG00000026012	12487	Cd28	protein_coding	CD28 antigen [Source:MGI Symbol;Acc:MGI:88327]	-3.15465	-1.65748	-1.76574	-1.54922	5.32669e-28	7.75342e-26
ENSMUSG00000028927	18600	Padi2	protein_coding	peptidyl arginine deiminase, type II [Source:MGI Symbol;Acc:MGI:1338892]	-3.4763	-1.79755	-1.91317	-1.68194	3.07818e-28	4.62663e-26
ENSMUSG00000032046	76192	Abhd12	protein_coding	abhydrolase domain containing 12 [Source:MGI Symbol;Acc:MGI:1923442]	-2.79191	-1.48125	-1.57595	-1.38655	2.48795e-28	3.8226e-26
ENSMUSG00000018339	14778	Gpx3	protein_coding	glutathione peroxidase 3 [Source:MGI Symbol;Acc:MGI:105102]	-4.68774	-2.22889	-2.37133	-2.08646	2.4481e-28	3.8226e-26
ENSMUSG00000032741	252972	Tpcn1	protein_coding	two pore channel 1 [Source:MGI Symbol;Acc:MGI:2182472]	-3.37694	-1.75572	-1.86777	-1.64366	2.34196e-28	3.76566e-26
ENSMUSG00000040209	170753	Zfp704	protein_coding	zinc finger protein 704 [Source:MGI Symbol;Acc:MGI:2180715]	-3.93317	-1.97569	-2.09944	-1.85194	1.20019e-28	2.15535e-26
ENSMUSG00000032220	71602	Myo1e	protein_coding	myosin IE [Source:MGI Symbol;Acc:MGI:106621]	-2.82697	-1.49926	-1.59197	-1.40654	7.61665e-29	1.38583e-26
ENSMUSG00000034957	12606	Cebpa	protein_coding	CCAAT/enhancer binding protein (C/EBP), alpha [Source:MGI Symbol;Acc:MGI:99480]	-4.4027	-2.13839	-2.26975	-2.00703	5.99953e-29	1.1211e-26
ENSMUSG00000071042	240168	Rasgrp3	protein_coding	RAS, guanyl releasing protein 3 [Source:MGI Symbol;Acc:MGI:3028579]	-7.83982	-2.97082	-3.14644	-2.7952	1.52441e-29	3.69816e-27
ENSMUSG00000026687	56752	Aldh9a1	protein_coding	aldehyde dehydrogenase 9, subfamily A1 [Source:MGI Symbol;Acc:MGI:1861622]	-2.50734	-1.32616	-1.40183	-1.25048	4.30901e-30	1.26777e-27
ENSMUSG00000031996	11804	Aplp2	protein_coding	amyloid beta (A4) precursor-like protein 2 [Source:MGI Symbol;Acc:MGI:88047]	-2.11558	-1.08105	-1.14259	-1.01952	3.93787e-30	1.18376e-27
ENSMUSG00000025993	53945	Slc40a1	protein_coding	solute carrier family 40 (iron-regulated transporter), member 1 [Source:MGI Symbol;Acc:MGI:1315204]	-5.04297	-2.33427	-2.45295	-2.2156	6.80507e-32	3.36073e-29
ENSMUSG00000028238	242341	Atp6v0d2	protein_coding	ATPase, H+ transporting, lysosomal V0 subunit D2 [Source:MGI Symbol;Acc:MGI:1924415]	-10.5727	-3.40227	-3.57371	-3.23083	4.947e-32	2.63104e-29
ENSMUSG00000030208	13730	Emp1	protein_coding	epithelial membrane protein 1 [Source:MGI Symbol;Acc:MGI:107941]	-6.14872	-2.62029	-2.74876	-2.49182	1.84294e-32	1.34127e-29
ENSMUSG00000015568	16956	Lpl	protein_coding	lipoprotein lipase [Source:MGI Symbol;Acc:MGI:96820]	-15.9223	-3.99297	-4.18389	-3.80206	7.43782e-33	6.42813e-30

## Sheet: 5µmF vs UI
Differentially expressed genes (adj P val ≥0.01 and linear FC ≥2 in WT BMDMs infected with H37Rv for 72 hours post infection at MOI 5; Differentially expressed genes presented in 5µmF- relative to uninfected BMDMs.
Feature_ID	entrezgene	external_gene_name	gene_biotype	description	LinearFC	logFC	CI.L	CI.R	P.Value	adj.P.Val
ENSMUSG00000024164	12266	C3	protein_coding	complement component 3 [Source:MGI Symbol;Acc:MGI:88227]	12.1982	3.60859	3.46517	3.75202	9.21788e-36	1.27465e-31
ENSMUSG00000021322	27052	Aoah	protein_coding	acyloxyacyl hydrolase [Source:MGI Symbol;Acc:MGI:1350928]	3.26147	1.70552	1.62593	1.78512	3.10701e-33	1.43213e-29
ENSMUSG00000023067	12575	Cdkn1a	protein_coding	cyclin-dependent kinase inhibitor 1A (P21) [Source:MGI Symbol;Acc:MGI:104556]	2.77216	1.47101	1.40247	1.53955	2.93343e-33	1.43213e-29
ENSMUSG00000027514	58203	Zbp1	protein_coding	Z-DNA binding protein 1 [Source:MGI Symbol;Acc:MGI:1927449]	4.28132	2.09806	1.99794	2.19817	6.92732e-33	2.39477e-29
ENSMUSG00000025498	54123	Irf7	protein_coding	interferon regulatory factor 7 [Source:MGI Symbol;Acc:MGI:1859212]	3.65477	1.86978	1.77763	1.96193	2.22035e-32	6.1406e-29
ENSMUSG00000028270	14469	Gbp2	protein_coding	guanylate binding protein 2 [Source:MGI Symbol;Acc:MGI:102772]	6.73324	2.7513	2.61165	2.89095	6.42534e-32	1.0611e-28
ENSMUSG00000034459	15957	Ifit1	protein_coding	interferon-induced protein with tetratricopeptide repeats 1 [Source:MGI Symbol;Acc:MGI:99450]	4.76537	2.25259	2.13847	2.36671	6.00008e-32	1.0611e-28
ENSMUSG00000009585	80287	Apobec3	protein_coding	apolipoprotein B mRNA editing enzyme, catalytic polypeptide 3 [Source:MGI Symbol;Acc:MGI:1933111]	2.99116	1.58071	1.50036	1.66105	6.74507e-32	1.0611e-28
ENSMUSG00000061232	14972	H2-K1	protein_coding	histocompatibility 2, K1, K region [Source:MGI Symbol;Acc:MGI:95904]	2.11225	1.07878	1.02391	1.13365	6.90618e-32	1.0611e-28
ENSMUSG00000022587	17069	Ly6e	protein_coding	lymphocyte antigen 6 complex, locus E [Source:MGI Symbol;Acc:MGI:106651]	3.21022	1.68267	1.5961	1.76925	1.0456e-31	1.44585e-28
ENSMUSG00000037405	15894	Icam1	protein_coding	intercellular adhesion molecule 1 [Source:MGI Symbol;Acc:MGI:96392]	4.1434	2.05081	1.94417	2.15745	1.53227e-31	1.80087e-28
ENSMUSG00000078853	16145	Igtp	protein_coding	interferon gamma induced GTPase [Source:MGI Symbol;Acc:MGI:107729]	3.25936	1.70459	1.6159	1.79327	1.56281e-31	1.80087e-28
ENSMUSG00000060519	30935	Tor3a	protein_coding	torsin family 3, member A [Source:MGI Symbol;Acc:MGI:1353652]	2.45381	1.29502	1.22658	1.36346	2.74644e-31	2.92137e-28
ENSMUSG00000036067	227659	Slc2a6	protein_coding	solute carrier family 2 (facilitated glucose transporter), member 6 [Source:MGI Symbol;Acc:MGI:2443286]	4.90842	2.29526	2.17279	2.41772	3.87121e-31	3.82365e-28
ENSMUSG00000029561	23962	Oasl2	protein_coding	2'-5' oligoadenylate synthetase-like 2 [Source:MGI Symbol;Acc:MGI:1344390]	2.11415	1.08007	1.02226	1.13789	4.33887e-31	3.99986e-28
ENSMUSG00000025790	108116	Slco3a1	protein_coding	solute carrier organic anion transporter family, member 3a1 [Source:MGI Symbol;Acc:MGI:1351867]	4.81427	2.26732	2.14417	2.39047	7.34083e-31	5.97112e-28
ENSMUSG00000056116	15051	H2-T22	protein_coding	histocompatibility 2, T region locus 22 [Source:MGI Symbol;Acc:MGI:95956]	3.11157	1.63764	1.54879	1.72649	7.05045e-31	5.97112e-28
ENSMUSG00000018899	16362	Irf1	protein_coding	interferon regulatory factor 1 [Source:MGI Symbol;Acc:MGI:96590]	2.82961	1.5006	1.41874	1.58247	8.59515e-31	6.60298e-28
ENSMUSG00000018920	66102	Cxcl16	protein_coding	chemokine (C-X-C motif) ligand 16 [Source:MGI Symbol;Acc:MGI:1932682]	2.60534	1.38147	1.30579	1.45715	9.98395e-31	6.9029e-28
ENSMUSG00000002103	11432	Acp2	protein_coding	acid phosphatase 2, lysosomal [Source:MGI Symbol;Acc:MGI:87882]	2.00385	1.00277	0.947877	1.05767	9.74748e-31	6.9029e-28
ENSMUSG00000037321	21354	Tap1	protein_coding	transporter 1, ATP-binding cassette, sub-family B (MDR/TAP) [Source:MGI Symbol;Acc:MGI:98483]	2.52122	1.33412	1.26053	1.4077	1.27411e-30	8.38971e-28
ENSMUSG00000040033	20847	Stat2	protein_coding	signal transducer and activator of transcription 2 [Source:MGI Symbol;Acc:MGI:103039]	2.43378	1.2832	1.21221	1.35418	1.41798e-30	8.91262e-28
ENSMUSG00000030830	16408	Itgal	protein_coding	integrin alpha L [Source:MGI Symbol;Acc:MGI:96606]	8.60848	3.10576	2.93343	3.27809	1.57809e-30	9.48775e-28
ENSMUSG00000034422	547253	Parp14	protein_coding	poly (ADP-ribose) polymerase family, member 14 [Source:MGI Symbol;Acc:MGI:1919489]	2.00365	1.00263	0.946833	1.05843	1.75709e-30	1.01238e-27
ENSMUSG00000040296	230073	Ddx58	protein_coding	DEAD (Asp-Glu-Ala-Asp) box polypeptide 58 [Source:MGI Symbol;Acc:MGI:2442858]	2.48262	1.31186	1.23855	1.38518	2.04012e-30	1.12843e-27
ENSMUSG00000023367	66058	Tmem176a	protein_coding	transmembrane protein 176A [Source:MGI Symbol;Acc:MGI:1913308]	5.23386	2.38788	2.25217	2.52358	3.72466e-30	1.90758e-27
ENSMUSG00000032661	246727	Oas3	protein_coding	2'-5' oligoadenylate synthetase 3 [Source:MGI Symbol;Acc:MGI:2180850]	2.4673	1.30293	1.22855	1.37732	4.37387e-30	2.16007e-27
ENSMUSG00000029810	65963	Tmem176b	protein_coding	transmembrane protein 176B [Source:MGI Symbol;Acc:MGI:1916348]	4.06411	2.02294	1.90662	2.13926	5.66308e-30	2.70031e-27
ENSMUSG00000046718	69550	Bst2	protein_coding	bone marrow stromal cell antigen 2 [Source:MGI Symbol;Acc:MGI:1916800]	2.83757	1.50466	1.41747	1.59184	7.45314e-30	3.4354e-27
ENSMUSG00000029063	192185	Nadk	protein_coding	NAD kinase [Source:MGI Symbol;Acc:MGI:2183149]	2.26218	1.17771	1.10886	1.24656	1.02452e-29	4.57002e-27
ENSMUSG00000041827	231655	Oasl1	protein_coding	2'-5' oligoadenylate synthetase-like 1 [Source:MGI Symbol;Acc:MGI:2180849]	4.66989	2.22339	2.09305	2.35373	1.13035e-29	4.88454e-27
ENSMUSG00000035929	15015	H2-Q4	protein_coding	histocompatibility 2, Q region locus 4 [Source:MGI Symbol;Acc:MGI:95933]	2.66976	1.41671	1.33338	1.50004	1.27317e-29	5.33496e-27
ENSMUSG00000029798	67138	Herc6	protein_coding	hect domain and RLD 6 [Source:MGI Symbol;Acc:MGI:1914388]	3.04923	1.60844	1.51179	1.7051	2.73381e-29	1.11186e-26
ENSMUSG00000031304	16186	Il2rg	protein_coding	interleukin 2 receptor, gamma chain [Source:MGI Symbol;Acc:MGI:96551]	2.64184	1.40154	1.31717	1.48591	2.91466e-29	1.15154e-26
ENSMUSG00000020638	22169	Cmpk2	protein_coding	cytidine monophosphate (UMP-CMP) kinase 2, mitochondrial [Source:MGI Symbol;Acc:MGI:99830]	3.72166	1.89595	1.78166	2.01023	3.05946e-29	1.17517e-26
ENSMUSG00000074896	15959	Ifit3	protein_coding	interferon-induced protein with tetratricopeptide repeats 3 [Source:MGI Symbol;Acc:MGI:1101055]	4.15536	2.05498	1.93073	2.17922	3.40893e-29	1.27402e-26
ENSMUSG00000024397	11629	Aif1	protein_coding	allograft inflammatory factor 1 [Source:MGI Symbol;Acc:MGI:1343098]	3.32225	1.73216	1.62698	1.83734	3.97398e-29	1.44266e-26
ENSMUSG00000026896	71586	Ifih1	protein_coding	interferon induced with helicase C domain 1 [Source:MGI Symbol;Acc:MGI:1918836]	2.39497	1.26001	1.18345	1.33657	4.06882e-29	1.44266e-26
ENSMUSG00000003617	12870	Cp	protein_coding	ceruloplasmin [Source:MGI Symbol;Acc:MGI:88476]	6.74456	2.75372	2.58444	2.923	6.15667e-29	2.12836e-26
ENSMUSG00000030403	22323	Vasp	protein_coding	vasodilator-stimulated phosphoprotein [Source:MGI Symbol;Acc:MGI:109268]	3.50515	1.80948	1.69669	1.92227	1.01061e-28	3.40847e-26
ENSMUSG00000073409	110557	H2-Q6	protein_coding	histocompatibility 2, Q region locus 6 [Source:MGI Symbol;Acc:MGI:95935]	8.29112	3.05157	2.86094	3.2422	1.09187e-28	3.51126e-26
ENSMUSG00000028268	55932	Gbp3	protein_coding	guanylate binding protein 3 [Source:MGI Symbol;Acc:MGI:1926263]	5.16455	2.36864	2.22076	2.51653	1.0697e-28	3.51126e-26
ENSMUSG00000030990	233575	Pgap2	protein_coding	post-GPI attachment to proteins 2 [Source:MGI Symbol;Acc:MGI:2385286]	2.22767	1.15553	1.08272	1.22835	1.48755e-28	4.57109e-26
ENSMUSG00000060550	15018	H2-Q7	protein_coding	histocompatibility 2, Q region locus 7 [Source:MGI Symbol;Acc:MGI:95936]	7.57255	2.92078	2.73533	3.10623	1.94796e-28	5.85575e-26
ENSMUSG00000042349	56489	Ikbke	protein_coding	inhibitor of kappaB kinase epsilon [Source:MGI Symbol;Acc:MGI:1929612]	2.426	1.27858	1.19734	1.35982	1.99993e-28	5.88405e-26
ENSMUSG00000000386	NA	Mx1	protein_coding	MX dynamin-like GTPase 1 [Source:MGI Symbol;Acc:MGI:97243]	4.30401	2.10568	1.97156	2.23981	2.18237e-28	6.28704e-26
ENSMUSG00000078920	15953	Ifi47	protein_coding	interferon gamma inducible protein 47 [Source:MGI Symbol;Acc:MGI:99448]	3.36666	1.75132	1.63872	1.86392	3.03943e-28	8.40583e-26
ENSMUSG00000045932	15958	Ifit2	protein_coding	interferon-induced protein with tetratricopeptide repeats 2 [Source:MGI Symbol;Acc:MGI:99449]	4.36228	2.12508	1.98836	2.2618	3.11679e-28	8.45078e-26
ENSMUSG00000079362	NA	Gm43302	protein_coding	predicted gene 43302 [Source:MGI Symbol;Acc:MGI:5663439]	7.62054	2.92989	2.74117	3.11862	3.24733e-28	8.63539e-26
ENSMUSG00000021871	NA	Gm49342	protein_coding	predicted gene, 49342 [Source:MGI Symbol;Acc:MGI:6121535]	2.62353	1.39151	1.30152	1.48149	3.7378e-28	9.75212e-26
ENSMUSG00000035692	100038882	Isg15	protein_coding	ISG15 ubiquitin-like modifier [Source:MGI Symbol;Acc:MGI:1855694]	5.03385	2.33166	2.18068	2.48265	3.92086e-28	1.00403e-25
ENSMUSG00000062488	667370	Ifit3b	protein_coding	interferon-induced protein with tetratricopeptide repeats 3B [Source:MGI Symbol;Acc:MGI:3698419]	4.7605	2.25111	2.10485	2.39737	4.41727e-28	1.11058e-25
ENSMUSG00000027580	229003	Helz2	protein_coding	helicase with zinc finger 2, transcriptional coactivator [Source:MGI Symbol;Acc:MGI:2385169]	2.52611	1.33692	1.24997	1.42387	4.5815e-28	1.1313e-25
ENSMUSG00000047945	17357	Marcksl1	protein_coding	MARCKS-like 1 [Source:MGI Symbol;Acc:MGI:97143]	6.45713	2.69089	2.51567	2.86611	4.77563e-28	1.1455e-25
ENSMUSG00000032000	11796	Birc3	protein_coding	baculoviral IAP repeat-containing 3 [Source:MGI Symbol;Acc:MGI:1197007]	3.00145	1.58566	1.48239	1.68893	4.80469e-28	1.1455e-25
ENSMUSG00000028037	99899	Ifi44	protein_coding	interferon-induced protein 44 [Source:MGI Symbol;Acc:MGI:2443016]	4.49688	2.16892	2.02633	2.31152	6.71313e-28	1.57338e-25
ENSMUSG00000036887	12259	C1qa	protein_coding	complement component 1, q subcomponent, alpha polypeptide [Source:MGI Symbol;Acc:MGI:88223]	2.03422	1.02448	0.95611	1.09284	1.13969e-27	2.54187e-25
ENSMUSG00000002983	19698	Relb	protein_coding	avian reticuloendotheliosis viral (v-rel) oncogene related B [Source:MGI Symbol;Acc:MGI:103289]	2.71554	1.44124	1.3449	1.53758	1.20933e-27	2.65438e-25
ENSMUSG00000075602	110454	Ly6a	protein_coding	lymphocyte antigen 6 complex, locus A [Source:MGI Symbol;Acc:MGI:107527]	6.18027	2.62767	2.45187	2.80347	1.24807e-27	2.65512e-25
ENSMUSG00000044350	210808	Lacc1	protein_coding	laccase domain containing 1 [Source:MGI Symbol;Acc:MGI:2445077]	2.36806	1.2437	1.16051	1.3269	1.24118e-27	2.65512e-25
ENSMUSG00000027995	24088	Tlr2	protein_coding	toll-like receptor 2 [Source:MGI Symbol;Acc:MGI:1346060]	3.73157	1.89978	1.77151	2.02805	1.72549e-27	3.61517e-25
ENSMUSG00000020641	58185	Rsad2	protein_coding	radical S-adenosyl methionine domain containing 2 [Source:MGI Symbol;Acc:MGI:1929628]	4.17484	2.06172	1.92214	2.2013	1.90044e-27	3.92228e-25
ENSMUSG00000066677	100033459	Ifi208	protein_coding	interferon activated gene 208 [Source:MGI Symbol;Acc:MGI:2442822]	4.53197	2.18014	2.03227	2.328	2.02502e-27	4.11793e-25
ENSMUSG00000038507	243771	Parp12	protein_coding	poly (ADP-ribose) polymerase family, member 12 [Source:MGI Symbol;Acc:MGI:2143990]	2.02153	1.01545	0.946372	1.08452	2.24814e-27	4.5054e-25
ENSMUSG00000021025	18035	Nfkbia	protein_coding	nuclear factor of kappa light polypeptide gene enhancer in B cells inhibitor, alpha [Source:MGI Symbol;Acc:MGI:104741]	3.68993	1.88359	1.755	2.01219	2.55403e-27	5.04531e-25
ENSMUSG00000030107	24110	Usp18	protein_coding	ubiquitin specific peptidase 18 [Source:MGI Symbol;Acc:MGI:1344364]	3.2526	1.70159	1.58403	1.81916	3.89429e-27	7.4792e-25
ENSMUSG00000053835	15042	H2-T24	protein_coding	histocompatibility 2, T region locus 24 [Source:MGI Symbol;Acc:MGI:95958]	2.04227	1.03017	0.95846	1.10189	5.08701e-27	9.63605e-25
ENSMUSG00000027078	56791	Ube2l6	protein_coding	ubiquitin-conjugating enzyme E2L 6 [Source:MGI Symbol;Acc:MGI:1914500]	2.95604	1.56367	1.45474	1.67259	5.21512e-27	9.74523e-25
ENSMUSG00000003283	15162	Hck	protein_coding	hemopoietic cell kinase [Source:MGI Symbol;Acc:MGI:96052]	2.14715	1.10242	1.02524	1.1796	6.21668e-27	1.11646e-24
ENSMUSG00000052776	246730	Oas1a	protein_coding	2'-5' oligoadenylate synthetase 1A [Source:MGI Symbol;Acc:MGI:2180860]	2.03509	1.02509	0.953327	1.09686	6.21692e-27	1.11646e-24
ENSMUSG00000022575	69146	Gsdmd	protein_coding	gasdermin D [Source:MGI Symbol;Acc:MGI:1916396]	2.01051	1.00756	0.936426	1.07869	8.36728e-27	1.47779e-24
ENSMUSG00000046879	15944	Irgm1	protein_coding	immunity-related GTPase family M member 1 [Source:MGI Symbol;Acc:MGI:107567]	2.24906	1.16932	1.08665	1.25199	8.77908e-27	1.51746e-24
ENSMUSG00000040264	14468	Gbp2b	protein_coding	guanylate binding protein 2b [Source:MGI Symbol;Acc:MGI:95666]	7.04217	2.81602	2.61625	3.01579	9.91286e-27	1.69228e-24
ENSMUSG00000038352	217151	Arl5c	protein_coding	ADP-ribosylation factor-like 5C [Source:MGI Symbol;Acc:MGI:3028577]	4.31042	2.10783	1.95781	2.25785	1.112e-26	1.8752e-24
ENSMUSG00000040253	229900	Gbp7	protein_coding	guanylate binding protein 7 [Source:MGI Symbol;Acc:MGI:2444421]	3.28505	1.71591	1.5937	1.83813	1.1414e-26	1.90159e-24
ENSMUSG00000049502	209200	Dtx3l	protein_coding	deltex 3-like, E3 ubiquitin ligase [Source:MGI Symbol;Acc:MGI:2656973]	2.04735	1.03375	0.960046	1.10746	1.18578e-26	1.95202e-24
ENSMUSG00000022014	108670	Epsti1	protein_coding	epithelial stromal interaction 1 (breast) [Source:MGI Symbol;Acc:MGI:1915168]	2.19458	1.13394	1.05272	1.21517	1.39328e-26	2.26661e-24
ENSMUSG00000026104	20846	Stat1	protein_coding	signal transducer and activator of transcription 1 [Source:MGI Symbol;Acc:MGI:103063]	2.44645	1.29069	1.19779	1.38359	1.6516e-26	2.65561e-24
ENSMUSG00000079197	19188	Psme2	protein_coding	proteasome (prosome, macropain) activator subunit 2 (PA28 beta) [Source:MGI Symbol;Acc:MGI:1096365]	2.5189	1.33279	1.2363	1.42928	2.02763e-26	3.22277e-24
ENSMUSG00000026875	22029	Traf1	protein_coding	TNF receptor-associated factor 1 [Source:MGI Symbol;Acc:MGI:101836]	7.76412	2.95682	2.74269	3.17096	2.05231e-26	3.22493e-24
ENSMUSG00000078921	100039796	Tgtp2	protein_coding	T cell specific GTPase 2 [Source:MGI Symbol;Acc:MGI:3710083]	4.81052	2.26619	2.10131	2.43108	2.41808e-26	3.75699e-24
ENSMUSG00000069874	54396	Irgm2	protein_coding	immunity-related GTPase family M member 2 [Source:MGI Symbol;Acc:MGI:1926262]	2.52443	1.33596	1.23832	1.43359	2.82709e-26	4.29593e-24
ENSMUSG00000032596	74153	Uba7	protein_coding	ubiquitin-like modifier activating enzyme 7 [Source:MGI Symbol;Acc:MGI:1349462]	2.04163	1.02972	0.95439	1.10506	2.93331e-26	4.40889e-24
ENSMUSG00000066861	23960	Oas1g	protein_coding	2'-5' oligoadenylate synthetase 1G [Source:MGI Symbol;Acc:MGI:97429]	2.53061	1.33949	1.2411	1.43787	3.37494e-26	4.96476e-24
ENSMUSG00000034855	15945	Cxcl10	protein_coding	chemokine (C-X-C motif) ligand 10 [Source:MGI Symbol;Acc:MGI:1352450]	18.5895	4.21641	3.90399	4.52884	4.59247e-26	6.63303e-24
ENSMUSG00000035356	80859	Nfkbiz	protein_coding	nuclear factor of kappa light polypeptide gene enhancer in B cells inhibitor, zeta [Source:MGI Symbol;Acc:MGI:1931595]	2.61997	1.38955	1.28651	1.49259	4.71434e-26	6.66369e-24
ENSMUSG00000039942	19219	Ptger4	protein_coding	prostaglandin E receptor 4 (subtype EP4) [Source:MGI Symbol;Acc:MGI:104311]	2.47974	1.31019	1.21303	1.40735	4.7226e-26	6.66369e-24
ENSMUSG00000091649	236451	Phf11b	protein_coding	PHD finger protein 11B [Source:MGI Symbol;Acc:MGI:3645789]	4.03322	2.01193	1.86221	2.16165	5.33748e-26	7.45522e-24
ENSMUSG00000037921	234311	Ddx60	protein_coding	DEAD (Asp-Glu-Ala-Asp) box polypeptide 60 [Source:MGI Symbol;Acc:MGI:2384570]	2.82692	1.49923	1.38762	1.61084	5.40672e-26	7.47641e-24
ENSMUSG00000022906	80285	Parp9	protein_coding	poly (ADP-ribose) polymerase family, member 9 [Source:MGI Symbol;Acc:MGI:1933117]	2.12062	1.08448	1.00362	1.16535	5.7258e-26	7.83925e-24
ENSMUSG00000073491	623121	Ifi213	protein_coding	interferon activated gene 213 [Source:MGI Symbol;Acc:MGI:3695276]	3.25412	1.70227	1.57452	1.83002	7.17971e-26	9.73344e-24
ENSMUSG00000024772	13660	Ehd1	protein_coding	EH-domain containing 1 [Source:MGI Symbol;Acc:MGI:1341878]	3.15815	1.65908	1.53426	1.7839	7.82731e-26	1.05083e-23
ENSMUSG00000037849	102639543	Ifi206	protein_coding	interferon activated gene 206 [Source:MGI Symbol;Acc:MGI:3646410]	3.00876	1.58917	1.46922	1.70912	8.78202e-26	1.16767e-23
[truncated: 565 more rows]
